# Supplementary material for: Feasibility of associative mechanism in enyne metathesis catalyzed by grubbs complexes
Source: Royal Society of Chemistry journal article supplement (doi:10.1039/b702680c), 2007-01-01
Supplement: b702680c.pdf [file b702680c.pdf]

## Supplementary Data

### Feasibility of Associative Mechanism in Enyne Metathesis Catalyzed by Grubbs Complexes

Rebeca García-Fandiño,<sup>a</sup> Luis Castedo,<sup>a</sup> Juan R. Granja,<sup>\*,a</sup> Diego J Cárdenas<sup>\*,b</sup>

<sup>a</sup>*Departamento de Química Orgánica e Unidade Asociada ó CSIC, Facultade de  
Química, Universidade de Santiago, 15706 Santiago de Compostela, Spain*

<sup>b</sup>*Departamento de Química Orgánica, Universidad Autónoma de Madrid, Cantoblanco,  
28049 Madrid, Spain*

---

#### Atomic Cartesian coordinates and computed energies (atomic units) for the stationary points calculated with basis set B<sub>1</sub> [B3LYP/6-31G(d) (C, H, N, O, P) LANL2DZ (Ru)]

##### Ethyne

Zero-point correction= 0.026655  
(Hartree/Particle)  
Thermal correction to Energy= 0.029583  
Thermal correction to Enthalpy= 0.030527  
Thermal correction to Gibbs Free Energy= 0.007632  
Sum of electronic and zero-point Energies= -77.297147  
Sum of electronic and thermal Energies= -77.294219  
Sum of electronic and thermal Enthalpies= -77.293275  
Sum of electronic and thermal Free Energies= -77.316170

---

| Center<br>Number | Atomic<br>Number | Atomic<br>Type | Coordinates (Angstroms) |          |           |
|------------------|------------------|----------------|-------------------------|----------|-----------|
|                  |                  |                | X                       | Y        | Z         |
| 1                | 6                | 0              | -0.000000               | 0.000000 | 0.602562  |
| 2                | 6                | 0              | 0.000000                | 0.000000 | -0.602562 |
| 3                | 1                | 0              | -0.000000               | 0.000000 | 1.669064  |
| 4                | 1                | 0              | 0.000000                | 0.000000 | -1.669064 |

---

##### 1-propyne

Zero-point correction= 0.055733  
(Hartree/Particle)  
Thermal correction to Energy= 0.059729

Thermal correction to Enthalpy= 0.060673  
 Thermal correction to Gibbs Free Energy= 0.031505  
 Sum of electronic and zero-point Energies= -116.594950  
 Sum of electronic and thermal Energies= -116.590954  
 Sum of electronic and thermal Enthalpies= -116.590010  
 Sum of electronic and thermal Free Energies= -116.619177

| Center<br>Number | Atomic<br>Number | Atomic<br>Type | Coordinates (Angstroms) |           |           |
|------------------|------------------|----------------|-------------------------|-----------|-----------|
|                  |                  |                | X                       | Y         | Z         |
| 1                | 6                | 0              | 1.426249                | 0.000506  | -0.001418 |
| 2                | 6                | 0              | 0.218985                | -0.000013 | 0.001406  |
| 3                | 6                | 0              | -1.241535               | -0.000082 | -0.000209 |
| 4                | 1                | 0              | 2.492147                | -0.002133 | 0.003103  |
| 5                | 1                | 0              | -1.637384               | -0.873787 | -0.531674 |
| 6                | 1                | 0              | -1.637598               | 0.896719  | -0.491566 |
| 7                | 1                | 0              | -1.639361               | -0.023263 | 1.021461  |

### 3-methyl-1-butyne

Zero-point correction= 0.113315  
 (Hartree/Particle)  
 Thermal correction to Energy= 0.119607  
 Thermal correction to Enthalpy= 0.120552  
 Thermal correction to Gibbs Free Energy= 0.084461  
 Sum of electronic and zero-point Energies= -195.163932  
 Sum of electronic and thermal Energies= -195.157639  
 Sum of electronic and thermal Enthalpies= -195.156695  
 Sum of electronic and thermal Free Energies= -195.192785

| Center<br>Number | Atomic<br>Number | Atomic<br>Type | Coordinates (Angstroms) |           |           |
|------------------|------------------|----------------|-------------------------|-----------|-----------|
|                  |                  |                | X                       | Y         | Z         |
| 1                | 6                | 0              | 2.235116                | -0.000570 | 0.117535  |
| 2                | 6                | 0              | 1.050828                | -0.001153 | -0.121938 |
| 3                | 6                | 0              | -0.391342               | -0.000053 | -0.400734 |
| 4                | 6                | 0              | -1.060285               | 1.275260  | 0.152822  |
| 5                | 6                | 0              | -1.062523               | -1.274113 | 0.153001  |
| 6                | 1                | 0              | 3.279742                | -0.000543 | 0.329927  |
| 7                | 1                | 0              | -0.520808               | -0.000038 | -1.493327 |
| 8                | 1                | 0              | -2.126833               | 1.282510  | -0.099617 |
| 9                | 1                | 0              | -0.599180               | 2.175949  | -0.264460 |
| 10               | 1                | 0              | -0.964630               | 1.318779  | 1.243378  |
| 11               | 1                | 0              | -2.129075               | -1.279559 | -0.099460 |
| 12               | 1                | 0              | -0.966984               | -1.317637 | 1.243570  |
| 13               | 1                | 0              | -0.602995               | -2.175685 | -0.264124 |

### 2-butyne

Zero-point correction= 0.084674  
 (Hartree/Particle)  
 Thermal correction to Energy= 0.090421  
 Thermal correction to Enthalpy= 0.091365  
 Thermal correction to Gibbs Free Energy= 0.055956  
 Sum of electronic and zero-point Energies= -155.890994  
 Sum of electronic and thermal Energies= -155.885248

Sum of electronic and thermal Enthalpies= -155.884303  
 Sum of electronic and thermal Free Energies= -155.919713

| Center<br>Number | Atomic<br>Number | Atomic<br>Type | Coordinates (Angstroms) |           |           |
|------------------|------------------|----------------|-------------------------|-----------|-----------|
|                  |                  |                | X                       | Y         | Z         |
| 1                | 6                | 0              | 0.604637                | -0.000162 | 0.000316  |
| 2                | 6                | 0              | -0.604643               | -0.000725 | 0.000914  |
| 3                | 6                | 0              | 2.066248                | 0.000181  | -0.000280 |
| 4                | 6                | 0              | -2.066240               | 0.000257  | -0.000357 |
| 5                | 1                | 0              | 2.466168                | 1.021196  | -0.037474 |
| 6                | 1                | 0              | 2.466336                | -0.542171 | -0.866028 |
| 7                | 1                | 0              | 2.467073                | -0.478069 | 0.902151  |
| 8                | 1                | 0              | -2.466092               | -0.515037 | -0.882579 |
| 9                | 1                | 0              | -2.465649               | 1.022103  | -0.006318 |
| 10               | 1                | 0              | -2.467846               | -0.505333 | 0.886691  |

## 1

Zero-point correction= 0.258172  
 (Hartree/Particle)  
 Thermal correction to Energy= 0.280477  
 Thermal correction to Enthalpy= 0.281421  
 Thermal correction to Gibbs Free Energy= 0.204654  
 Sum of electronic and zero-point Energies= -1975.626592  
 Sum of electronic and thermal Energies= -1975.604288  
 Sum of electronic and thermal Enthalpies= -1975.603343  
 Sum of electronic and thermal Free Energies= -1975.680110

| Center<br>Number | Atomic<br>Number | Atomic<br>Type | Coordinates (Angstroms) |           |           |
|------------------|------------------|----------------|-------------------------|-----------|-----------|
|                  |                  |                | X                       | Y         | Z         |
| 1                | 17               | 0              | 0.000015                | -2.448191 | 0.024770  |
| 2                | 44               | 0              | 0.000000                | 0.001351  | -0.209803 |
| 3                | 6                | 0              | -0.000001               | 0.002396  | -2.025252 |
| 4                | 17               | 0              | -0.000014               | 2.450201  | 0.026175  |
| 5                | 15               | 0              | -2.377367               | -0.000342 | 0.167321  |
| 6                | 15               | 0              | 2.377367                | -0.000330 | 0.167321  |
| 7                | 6                | 0              | -3.330828               | -1.450333 | -0.444905 |
| 8                | 6                | 0              | -3.332463               | 1.454761  | -0.430041 |
| 9                | 6                | 0              | -2.670491               | -0.009930 | 1.989683  |
| 10               | 6                | 0              | 3.330841                | -1.450290 | -0.444961 |
| 11               | 6                | 0              | 2.670485                | -0.009991 | 1.989684  |
| 12               | 6                | 0              | 3.332455                | 1.454802  | -0.429980 |
| 13               | 1                | 0              | -3.353110               | 1.447508  | -1.524271 |
| 14               | 1                | 0              | -2.823406               | 2.365773  | -0.106348 |
| 15               | 1                | 0              | -4.359955               | 1.434529  | -0.049724 |
| 16               | 1                | 0              | -2.211057               | -0.903156 | 2.423882  |
| 17               | 1                | 0              | -3.742756               | -0.010841 | 2.215417  |
| 18               | 1                | 0              | -2.210801               | 0.878358  | 2.433688  |
| 19               | 1                | 0              | -2.820228               | -2.363834 | -0.130748 |
| 20               | 1                | 0              | -3.352028               | -1.431493 | -1.538989 |
| 21               | 1                | 0              | -4.358184               | -1.435659 | -0.063972 |
| 22               | 1                | 0              | 3.353104                | 1.447595  | -1.524210 |
| 23               | 1                | 0              | 4.359946                | 1.434560  | -0.049663 |

|    |   |   |           |           |           |
|----|---|---|-----------|-----------|-----------|
| 24 | 1 | 0 | 2.823393  | 2.365800  | -0.106253 |
| 25 | 1 | 0 | 2.211057  | -0.903240 | 2.423842  |
| 26 | 1 | 0 | 2.210785  | 0.878274  | 2.433726  |
| 27 | 1 | 0 | 3.742749  | -0.010901 | 2.215421  |
| 28 | 1 | 0 | 3.352047  | -1.431404 | -1.539044 |
| 29 | 1 | 0 | 2.820245  | -2.363806 | -0.130843 |
| 30 | 1 | 0 | 4.358194  | -1.435624 | -0.064022 |
| 31 | 1 | 0 | 0.000015  | -0.933507 | -2.599417 |
| 32 | 1 | 0 | -0.000001 | 0.939018  | -2.598217 |

## 2

Zero-point correction= 0.143001  
(Hartree/Particle)  
Thermal correction to Energy= 0.156724  
Thermal correction to Enthalpy= 0.157668  
Thermal correction to Gibbs Free Energy= 0.102018  
Sum of electronic and zero-point Energies= -1514.611307  
Sum of electronic and thermal Energies= -1514.597584  
Sum of electronic and thermal Enthalpies= -1514.596639  
Sum of electronic and thermal Free Energies= -1514.652289

| Center<br>Number | Atomic<br>Number | Atomic<br>Type | Coordinates (Angstroms) |           |           |
|------------------|------------------|----------------|-------------------------|-----------|-----------|
|                  |                  |                | X                       | Y         | Z         |
| 1                | 17               | 0              | -1.041271               | -2.232370 | -0.591665 |
| 2                | 44               | 0              | -0.839238               | 0.000504  | 0.130873  |
| 3                | 6                | 0              | -0.915808               | 0.000595  | 1.942875  |
| 4                | 17               | 0              | -1.038317               | 2.233529  | -0.591723 |
| 5                | 15               | 0              | 1.397773                | -0.000814 | -0.002681 |
| 6                | 6                | 0              | 2.220987                | -1.459231 | 0.756273  |
| 7                | 6                | 0              | 2.222722                | 1.456563  | 0.756414  |
| 8                | 6                | 0              | 1.954347                | -0.001082 | -1.754636 |
| 9                | 1                | 0              | -1.926249               | 0.001154  | 2.379796  |
| 10               | 1                | 0              | -0.091973               | 0.000202  | 2.664808  |
| 11               | 1                | 0              | 1.817965                | -2.367209 | 0.301209  |
| 12               | 1                | 0              | 2.007599                | -1.489113 | 1.828679  |
| 13               | 1                | 0              | 3.305476                | -1.411905 | 0.606451  |
| 14               | 1                | 0              | 2.010350                | 1.485824  | 1.829046  |
| 15               | 1                | 0              | 1.819920                | 2.365125  | 0.302326  |
| 16               | 1                | 0              | 3.307037                | 1.408547  | 0.605593  |
| 17               | 1                | 0              | 1.559587                | -0.890061 | -2.254769 |
| 18               | 1                | 0              | 3.048633                | -0.001957 | -1.814779 |
| 19               | 1                | 0              | 1.561041                | 0.888686  | -2.254524 |

## PMe<sub>3</sub>

Zero-point correction= 0.113368  
(Hartree/Particle)  
Thermal correction to Energy= 0.120095  
Thermal correction to Enthalpy= 0.121039  
Thermal correction to Gibbs Free Energy= 0.083992  
Sum of electronic and zero-point Energies= -460.980554  
Sum of electronic and thermal Energies= -460.973827  
Sum of electronic and thermal Enthalpies= -460.972883  
Sum of electronic and thermal Free Energies= -461.009930

| Center Number | Atomic Number | Atomic Type | Coordinates (Angstroms) |           |           |
|---------------|---------------|-------------|-------------------------|-----------|-----------|
|               |               |             | X                       | Y         | Z         |
| 1             | 15            | 0           | -0.000202               | -0.000526 | -0.604976 |
| 2             | 6             | 0           | 0.325032                | 1.611150  | 0.280178  |
| 3             | 6             | 0           | -1.558470               | -0.523760 | 0.280795  |
| 4             | 6             | 0           | 1.233587                | -1.086435 | 0.280828  |
| 5             | 1             | 0           | 1.305780                | 2.000315  | -0.015001 |
| 6             | 1             | 0           | 0.302998                | 1.509328  | 1.372755  |
| 7             | 1             | 0           | -0.425627               | 2.351762  | -0.017209 |
| 8             | 1             | 0           | -1.811513               | -1.552125 | -0.000149 |
| 9             | 1             | 0           | -2.391023               | 0.116544  | -0.031075 |
| 10            | 1             | 0           | -1.466486               | -0.471498 | 1.373143  |
| 11            | 1             | 0           | 1.081841                | -2.130240 | -0.015541 |
| 12            | 1             | 0           | 1.156438                | -1.017332 | 1.373436  |
| 13            | 1             | 0           | 2.249727                | -0.804590 | -0.016516 |

### 3a

Zero-point correction= 0.172058  
 (Hartree/Particle)  
 Thermal correction to Energy= 0.189281  
 Thermal correction to Enthalpy= 0.190225  
 Thermal correction to Gibbs Free Energy= 0.127552  
 Sum of electronic and zero-point Energies= -1591.923944  
 Sum of electronic and thermal Energies= -1591.906721  
 Sum of electronic and thermal Enthalpies= -1591.905777  
 Sum of electronic and thermal Free Energies= -1591.968450

| Center Number | Atomic Number | Atomic Type | Coordinates (Angstroms) |           |           |
|---------------|---------------|-------------|-------------------------|-----------|-----------|
|               |               |             | X                       | Y         | Z         |
| 1             | 17            | 0           | 0.509794                | 2.295198  | -0.636405 |
| 2             | 44            | 0           | 0.631038                | -0.000264 | 0.090224  |
| 3             | 6             | 0           | 0.664383                | -0.000790 | 1.910998  |
| 4             | 17            | 0           | 0.508613                | -2.295243 | -0.636603 |
| 5             | 15            | 0           | -1.699440               | 0.000369  | 0.045203  |
| 6             | 6             | 0           | -2.512479               | 1.447177  | 0.842792  |
| 7             | 6             | 0           | -2.513243               | -1.445896 | 0.843004  |
| 8             | 6             | 0           | -2.343695               | 0.000239  | -1.677126 |
| 9             | 1             | 0           | -0.203803               | -0.001003 | 2.580071  |
| 10            | 1             | 0           | 1.638929                | -0.001044 | 2.413103  |
| 11            | 1             | 0           | -3.600600               | 1.392437  | 0.727841  |
| 12            | 1             | 0           | -2.132277               | 2.363645  | 0.386565  |
| 13            | 1             | 0           | -2.267888               | 1.467556  | 1.909358  |
| 14            | 1             | 0           | -2.271344               | -1.464452 | 1.910222  |
| 15            | 1             | 0           | -2.131114               | -2.362664 | 0.388961  |
| 16            | 1             | 0           | -3.601120               | -1.392256 | 0.725331  |
| 17            | 1             | 0           | -1.970484               | 0.888965  | -2.194053 |
| 18            | 1             | 0           | -3.439202               | 0.001483  | -1.689594 |
| 19            | 1             | 0           | -1.972461               | -0.889927 | -2.193009 |
| 20            | 6             | 0           | 3.027913                | -0.609324 | 0.040309  |
| 21            | 6             | 0           | 3.028402                | 0.609272  | 0.040667  |
| 22            | 1             | 0           | 3.128634                | -1.672700 | 0.011809  |
| 23            | 1             | 0           | 3.128057                | 1.672721  | 0.012731  |

### 3a'

Zero-point correction= 0.173149  
(Hartree/Particle)  
Thermal correction to Energy= 0.189678  
Thermal correction to Enthalpy= 0.190622  
Thermal correction to Gibbs Free Energy= 0.129619  
Sum of electronic and zero-point Energies= -1591.920691  
Sum of electronic and thermal Energies= -1591.904162  
Sum of electronic and thermal Enthalpies= -1591.903218  
Sum of electronic and thermal Free Energies= -1591.964221

---

| Center<br>Number | Atomic<br>Number | Atomic<br>Type | Coordinates (Angstroms) |           |           |
|------------------|------------------|----------------|-------------------------|-----------|-----------|
|                  |                  |                | X                       | Y         | Z         |
| 1                | 17               | 0              | 0.603468                | -0.707248 | 2.294877  |
| 2                | 44               | 0              | -0.193628               | -0.955487 | -0.050873 |
| 3                | 6                | 0              | -1.923712               | -0.849576 | 0.510290  |
| 4                | 17               | 0              | -0.958708               | -0.734056 | -2.394111 |
| 5                | 15               | 0              | 0.097667                | 1.441874  | -0.061205 |
| 6                | 6                | 0              | -0.575520               | 2.367678  | 1.376864  |
| 7                | 6                | 0              | -0.518018               | 2.390418  | -1.508767 |
| 8                | 6                | 0              | 1.908900                | 1.774909  | -0.031912 |
| 9                | 1                | 0              | -2.748439               | -0.856298 | -0.208548 |
| 10               | 1                | 0              | -2.164303               | -0.841435 | 1.577982  |
| 11               | 1                | 0              | -0.225186               | 3.405559  | 1.360006  |
| 12               | 1                | 0              | -0.256882               | 1.875993  | 2.297786  |
| 13               | 1                | 0              | -1.668849               | 2.357114  | 1.327865  |
| 14               | 1                | 0              | -1.602411               | 2.278747  | -1.586978 |
| 15               | 1                | 0              | -0.079597               | 1.994326  | -2.426095 |
| 16               | 1                | 0              | -0.261874               | 3.449323  | -1.389763 |
| 17               | 1                | 0              | 2.333548                | 1.325107  | 0.869268  |
| 18               | 1                | 0              | 2.104600                | 2.853062  | -0.037275 |
| 19               | 1                | 0              | 2.379721                | 1.323849  | -0.911278 |
| 20               | 6                | 0              | 0.688836                | -2.901564 | 0.318165  |
| 21               | 6                | 0              | 0.319380                | -2.900390 | -0.868964 |
| 22               | 1                | 0              | 1.091186                | -3.189639 | 1.269455  |
| 23               | 1                | 0              | 0.103822                | -3.182266 | -1.880789 |

---

### TS (3-4) a

Zero-point correction= 0.171685  
(Hartree/Particle)  
Thermal correction to Energy= 0.188207  
Thermal correction to Enthalpy= 0.189151  
Thermal correction to Gibbs Free Energy= 0.126897  
Sum of electronic and zero-point Energies= -1591.896590  
Sum of electronic and thermal Energies= -1591.880068  
Sum of electronic and thermal Enthalpies= -1591.879124  
Sum of electronic and thermal Free Energies= -1591.941378

---

| Center<br>Number | Atomic<br>Number | Atomic<br>Type | Coordinates (Angstroms) |   |   |
|------------------|------------------|----------------|-------------------------|---|---|
|                  |                  |                | X                       | Y | Z |

|    |    |   |           |           |           |
|----|----|---|-----------|-----------|-----------|
| 1  | 17 | 0 | 0.386742  | -2.435938 | -0.175559 |
| 2  | 44 | 0 | 0.602624  | 0.003942  | -0.029508 |
| 3  | 6  | 0 | 2.501755  | -0.174975 | -1.015030 |
| 4  | 17 | 0 | 0.718720  | 2.427540  | -0.192213 |
| 5  | 15 | 0 | -1.779624 | 0.075722  | 0.023918  |
| 6  | 6  | 0 | -2.393856 | -0.380721 | -1.651052 |
| 7  | 6  | 0 | -2.584600 | 1.681624  | 0.410355  |
| 8  | 6  | 0 | -2.564926 | -1.130714 | 1.166401  |
| 9  | 6  | 0 | 2.960850  | -0.147958 | 0.147288  |
| 10 | 6  | 0 | 1.373538  | -0.045178 | 1.654128  |
| 11 | 1  | 0 | 2.607864  | -0.232326 | -2.082482 |
| 12 | 1  | 0 | -3.489264 | -0.384861 | -1.673793 |
| 13 | 1  | 0 | -2.014166 | -1.375126 | -1.901488 |
| 14 | 1  | 0 | -2.026375 | 0.339451  | -2.388898 |
| 15 | 1  | 0 | -2.182751 | 2.452352  | -0.250756 |
| 16 | 1  | 0 | -2.342488 | 1.969128  | 1.437473  |
| 17 | 1  | 0 | -3.672170 | 1.606249  | 0.299072  |
| 18 | 1  | 0 | -2.139852 | -2.117995 | 0.971412  |
| 19 | 1  | 0 | -3.651739 | -1.144319 | 1.028042  |
| 20 | 1  | 0 | -2.338729 | -0.849987 | 2.199621  |
| 21 | 1  | 0 | 3.705259  | -0.127033 | 0.918427  |
| 22 | 1  | 0 | 1.643829  | 0.876707  | 2.179736  |
| 23 | 1  | 0 | 1.530063  | -0.991243 | 2.182824  |

#### 4a

Zero-point correction= 0.176535  
(Hartree/Particle)  
Thermal correction to Energy= 0.192365  
Thermal correction to Enthalpy= 0.193309  
Thermal correction to Gibbs Free Energy= 0.132528  
Sum of electronic and zero-point Energies= -1591.942432  
Sum of electronic and thermal Energies= -1591.926602  
Sum of electronic and thermal Enthalpies= -1591.925658  
Sum of electronic and thermal Free Energies= -1591.986439

| Center Number | Atomic Number | Atomic Type | Coordinates (Angstroms) |           |           |
|---------------|---------------|-------------|-------------------------|-----------|-----------|
|               |               |             | X                       | Y         | Z         |
| 1             | 17            | 0           | 0.177404                | -2.378185 | -0.323944 |
| 2             | 44            | 0           | 0.695707                | 0.068328  | -0.247196 |
| 3             | 6             | 0           | 2.410787                | -0.726076 | -0.513632 |
| 4             | 17            | 0           | 0.758658                | 2.416918  | -0.336882 |
| 5             | 15            | 0           | -1.757400               | 0.090207  | 0.099553  |
| 6             | 6             | 0           | -2.728868               | -0.582606 | -1.315824 |
| 7             | 6             | 0           | -2.510641               | 1.750551  | 0.379903  |
| 8             | 6             | 0           | -2.335343               | -0.884552 | 1.552380  |
| 9             | 6             | 0           | 2.690246                | -0.147671 | 0.705995  |
| 10            | 6             | 0           | 1.575653                | -0.197781 | 1.644053  |
| 11            | 1             | 0           | 2.961806                | -1.183982 | -1.326857 |
| 12            | 1             | 0           | -3.802086               | -0.572691 | -1.094665 |
| 13            | 1             | 0           | -2.401248               | -1.605343 | -1.516446 |
| 14            | 1             | 0           | -2.543701               | 0.025989  | -2.206810 |
| 15            | 1             | 0           | -2.302319               | 2.395785  | -0.476869 |
| 16            | 1             | 0           | -2.057314               | 2.213934  | 1.260054  |
| 17            | 1             | 0           | -3.593419               | 1.662694  | 0.525624  |
| 18            | 1             | 0           | -1.979603               | -1.912548 | 1.457011  |
| 19            | 1             | 0           | -3.429118               | -0.871216 | 1.616269  |

|    |   |   |           |           |          |
|----|---|---|-----------|-----------|----------|
| 20 | 1 | 0 | -1.918676 | -0.451273 | 2.466848 |
| 21 | 1 | 0 | 3.514173  | 0.566163  | 0.816095 |
| 22 | 1 | 0 | 1.505733  | 0.617078  | 2.363198 |
| 23 | 1 | 0 | 1.271621  | -1.173764 | 2.016672 |

---

### 3b

|                                              |              |
|----------------------------------------------|--------------|
| Zero-point correction=                       | 0.200860     |
| (Hartree/Particle)                           |              |
| Thermal correction to Energy=                | 0.219786     |
| Thermal correction to Enthalpy=              | 0.220730     |
| Thermal correction to Gibbs Free Energy=     | 0.153506     |
| Sum of electronic and zero-point Energies=   | -1631.220940 |
| Sum of electronic and thermal Energies=      | -1631.202013 |
| Sum of electronic and thermal Enthalpies=    | -1631.201069 |
| Sum of electronic and thermal Free Energies= | -1631.268294 |

---

| Center<br>Number | Atomic<br>Number | Atomic<br>Type | Coordinates (Angstroms) |           |           |
|------------------|------------------|----------------|-------------------------|-----------|-----------|
|                  |                  |                | X                       | Y         | Z         |
| 1                | 17               | 0              | 0.362811                | 2.427398  | -0.562679 |
| 2                | 44               | 0              | -0.371068               | 0.213314  | 0.044897  |
| 3                | 15               | 0              | 1.867607                | -0.376706 | 0.094216  |
| 4                | 6                | 0              | 2.586512                | -0.466555 | -1.596408 |
| 5                | 6                | 0              | 2.242154                | -2.015303 | 0.846898  |
| 6                | 6                | 0              | 2.976328                | 0.775858  | 1.006470  |
| 7                | 6                | 0              | -0.507143               | 0.159599  | 1.859311  |
| 8                | 1                | 0              | 3.647343                | -0.738668 | -1.562938 |
| 9                | 1                | 0              | 2.474602                | 0.508751  | -2.078562 |
| 10               | 1                | 0              | 2.034965                | -1.212122 | -2.176212 |
| 11               | 1                | 0              | 1.679951                | -2.787586 | 0.317752  |
| 12               | 1                | 0              | 1.927549                | -2.018794 | 1.895196  |
| 13               | 1                | 0              | 3.315239                | -2.230179 | 0.797198  |
| 14               | 1                | 0              | 2.876116                | 1.776557  | 0.580852  |
| 15               | 1                | 0              | 4.018170                | 0.442650  | 0.945053  |
| 16               | 1                | 0              | 2.677520                | 0.819261  | 2.058311  |
| 17               | 1                | 0              | 0.284082                | -0.108789 | 2.569454  |
| 18               | 1                | 0              | -1.467630               | 0.429832  | 2.314164  |
| 19               | 6                | 0              | -2.559544               | 1.371871  | -0.172746 |
| 20               | 6                | 0              | -3.091789               | 0.297644  | 0.049995  |
| 21               | 6                | 0              | -3.827951               | -0.937426 | 0.301975  |
| 22               | 1                | 0              | -2.271802               | 2.381010  | -0.375406 |
| 23               | 1                | 0              | -4.889471               | -0.787738 | 0.072255  |
| 24               | 1                | 0              | -3.437845               | -1.747742 | -0.320294 |
| 25               | 1                | 0              | -3.743084               | -1.241688 | 1.351340  |
| 26               | 17               | 0              | -0.817176               | -1.976464 | -0.822605 |

---

### 3b'

|                                            |              |
|--------------------------------------------|--------------|
| Zero-point correction=                     | 0.201647     |
| (Hartree/Particle)                         |              |
| Thermal correction to Energy=              | 0.219889     |
| Thermal correction to Enthalpy=            | 0.220834     |
| Thermal correction to Gibbs Free Energy=   | 0.155857     |
| Sum of electronic and zero-point Energies= | -1631.216395 |
| Sum of electronic and thermal Energies=    | -1631.198153 |



Sum of electronic and thermal Enthalpies= -1631.197209  
 Sum of electronic and thermal Free Energies= -1631.262186

| Center<br>Number | Atomic<br>Number | Atomic<br>Type | Coordinates (Angstroms) |           |           |
|------------------|------------------|----------------|-------------------------|-----------|-----------|
|                  |                  |                | X                       | Y         | Z         |
| 1                | 17               | 0              | 0.651729                | -2.476369 | -0.001808 |
| 2                | 44               | 0              | -0.484193               | -0.257772 | -0.138120 |
| 3                | 6                | 0              | -2.064656               | -1.524006 | 0.547038  |
| 4                | 17               | 0              | -1.093434               | 2.129615  | -0.258032 |
| 5                | 15               | 0              | 1.784078                | 0.516227  | 0.218266  |
| 6                | 6                | 0              | 2.254905                | 0.070811  | 1.942666  |
| 7                | 6                | 0              | 2.137935                | 2.316766  | 0.105844  |
| 8                | 6                | 0              | 3.089743                | -0.236512 | -0.835228 |
| 9                | 6                | 0              | -2.614678               | -0.404297 | 0.518048  |
| 10               | 6                | 0              | -0.329482               | -0.287902 | -1.953606 |
| 11               | 6                | 0              | -3.675201               | 0.608496  | 0.623343  |
| 12               | 1                | 0              | -1.931767               | -2.580897 | 0.674452  |
| 13               | 1                | 0              | 3.283154                | 0.382260  | 2.157896  |
| 14               | 1                | 0              | 2.160999                | -1.011690 | 2.060047  |
| 15               | 1                | 0              | 1.578896                | 0.565591  | 2.647458  |
| 16               | 1                | 0              | 1.504385                | 2.864944  | 0.805077  |
| 17               | 1                | 0              | 1.906111                | 2.676420  | -0.899453 |
| 18               | 1                | 0              | 3.195396                | 2.498077  | 0.330080  |
| 19               | 1                | 0              | 2.971328                | -1.321599 | -0.827885 |
| 20               | 1                | 0              | 4.083911                | 0.038746  | -0.466334 |
| 21               | 1                | 0              | 2.974100                | 0.128520  | -1.860493 |
| 22               | 1                | 0              | -0.638715               | 0.568649  | -2.560234 |
| 23               | 1                | 0              | 0.017282                | -1.189425 | -2.468147 |
| 24               | 1                | 0              | -4.594410               | 0.130149  | 0.981990  |
| 25               | 1                | 0              | -3.387800               | 1.411201  | 1.306685  |
| 26               | 1                | 0              | -3.861948               | 1.072305  | -0.349221 |

### TS (3-4) b

Zero-point correction= 0.201208  
 (Hartree/Particle)  
 Thermal correction to Energy= 0.219021  
 Thermal correction to Enthalpy= 0.219965  
 Thermal correction to Gibbs Free Energy= 0.154850  
 Sum of electronic and zero-point Energies= -1631.190949  
 Sum of electronic and thermal Energies= -1631.173136  
 Sum of electronic and thermal Enthalpies= -1631.172192  
 Sum of electronic and thermal Free Energies= -1631.237307

| Center<br>Number | Atomic<br>Number | Atomic<br>Type | Coordinates (Angstroms) |           |           |
|------------------|------------------|----------------|-------------------------|-----------|-----------|
|                  |                  |                | X                       | Y         | Z         |
| 1                | 17               | 0              | -0.012316               | -2.441257 | -0.166865 |
| 2                | 44               | 0              | 0.369660                | 0.001409  | -0.120984 |
| 3                | 6                | 0              | 2.101635                | -0.490800 | -1.223516 |
| 4                | 17               | 0              | 0.604825                | 2.405099  | -0.293242 |
| 5                | 15               | 0              | -2.008685               | 0.138035  | 0.114781  |
| 6                | 6                | 0              | -2.803562               | -0.437736 | -1.443179 |
| 7                | 6                | 0              | -2.722972               | 1.805626  | 0.417807  |
| 8                | 6                | 0              | -2.726168               | -0.922643 | 1.433379  |
| 9                | 6                | 0              | 2.748065                | -0.267105 | -0.163561 |
| 10               | 6                | 0              | 1.334378                | -0.134508 | 1.456414  |

|    |   |   |           |           |           |
|----|---|---|-----------|-----------|-----------|
| 11 | 6 | 0 | 3.991651  | 0.067831  | 0.566982  |
| 12 | 1 | 0 | 2.105806  | -0.764187 | -2.263663 |
| 13 | 1 | 0 | -3.895107 | -0.405261 | -1.353800 |
| 14 | 1 | 0 | -2.475821 | -1.461592 | -1.641489 |
| 15 | 1 | 0 | -2.496328 | 0.203513  | -2.275465 |
| 16 | 1 | 0 | -2.375046 | 2.491551  | -0.357765 |
| 17 | 1 | 0 | -2.363274 | 2.187077  | 1.377406  |
| 18 | 1 | 0 | -3.818057 | 1.763257  | 0.427426  |
| 19 | 1 | 0 | -2.356459 | -1.941198 | 1.295440  |
| 20 | 1 | 0 | -3.821032 | -0.902648 | 1.392865  |
| 21 | 1 | 0 | -2.396400 | -0.557561 | 2.410763  |
| 22 | 1 | 0 | 1.673123  | 0.765302  | 1.979377  |
| 23 | 1 | 0 | 1.511075  | -1.096767 | 1.946551  |
| 24 | 1 | 0 | 4.841242  | -0.101134 | -0.104385 |
| 25 | 1 | 0 | 3.991650  | 1.123054  | 0.860531  |
| 26 | 1 | 0 | 4.129039  | -0.545234 | 1.463665  |

#### 4b

Zero-point correction= 0.204441  
(Hartree/Particle)  
Thermal correction to Energy= 0.221901  
Thermal correction to Enthalpy= 0.222846  
Thermal correction to Gibbs Free Energy= 0.158437  
Sum of electronic and zero-point Energies= -1631.236155  
Sum of electronic and thermal Energies= -1631.218695  
Sum of electronic and thermal Enthalpies= -1631.217751  
Sum of electronic and thermal Free Energies= -1631.282159

| Center<br>Number | Atomic<br>Number | Atomic<br>Type | Coordinates (Angstroms) |           |           |
|------------------|------------------|----------------|-------------------------|-----------|-----------|
|                  |                  |                | X                       | Y         | Z         |
| 1                | 17               | 0              | -0.334203               | -2.411297 | -0.349298 |
| 2                | 44               | 0              | 0.451045                | -0.037834 | -0.356988 |
| 3                | 6                | 0              | 2.053662                | -1.053348 | -0.607936 |
| 4                | 17               | 0              | 0.751741                | 2.290102  | -0.556128 |
| 5                | 15               | 0              | -1.930406               | 0.252828  | 0.205294  |
| 6                | 6                | 0              | -3.107811               | -0.333269 | -1.087780 |
| 7                | 6                | 0              | -2.476669               | 1.988362  | 0.512640  |
| 8                | 6                | 0              | -2.465769               | -0.628503 | 1.732201  |
| 9                | 6                | 0              | 2.495075                | -0.434871 | 0.543159  |
| 10               | 6                | 0              | 1.393832                | -0.292651 | 1.500251  |
| 11               | 6                | 0              | 3.797582                | 0.322405  | 0.649219  |
| 12               | 1                | 0              | 2.486085                | -1.656600 | -1.397956 |
| 13               | 1                | 0              | -4.145656               | -0.201332 | -0.761485 |
| 14               | 1                | 0              | -2.913966               | -1.388985 | -1.291188 |
| 15               | 1                | 0              | -2.949613               | 0.236013  | -2.009444 |
| 16               | 1                | 0              | -2.282809               | 2.596375  | -0.374111 |
| 17               | 1                | 0              | -1.898820               | 2.413704  | 1.337238  |
| 18               | 1                | 0              | -3.544615               | 2.017243  | 0.757848  |
| 19               | 1                | 0              | -2.232748               | -1.690540 | 1.631529  |
| 20               | 1                | 0              | -3.540704               | -0.495933 | 1.898757  |
| 21               | 1                | 0              | -1.918777               | -0.228043 | 2.591187  |
| 22               | 1                | 0              | 1.442877                | 0.562903  | 2.174991  |
| 23               | 1                | 0              | 1.007693                | -1.205100 | 1.951910  |
| 24               | 1                | 0              | 4.430735                | 0.171533  | -0.229530 |
| 25               | 1                | 0              | 3.589532                | 1.393957  | 0.746834  |

26            1            0            4.343358    -0.001380    1.543192

---

### 3c

Zero-point correction= 0.257914  
 (Hartree/Particle)  
 Thermal correction to Energy= 0.279525  
 Thermal correction to Enthalpy= 0.280469  
 Thermal correction to Gibbs Free Energy= 0.206506  
 Sum of electronic and zero-point Energies= -1709.790223  
 Sum of electronic and thermal Energies= -1709.768612  
 Sum of electronic and thermal Enthalpies= -1709.767668  
 Sum of electronic and thermal Free Energies= -1709.841631

---

| Center<br>Number | Atomic<br>Number | Atomic<br>Type | Coordinates (Angstroms) |           |           |
|------------------|------------------|----------------|-------------------------|-----------|-----------|
|                  |                  |                | X                       | Y         | Z         |
| 1                | 17               | 0              | 1.138603                | 2.369394  | -0.705600 |
| 2                | 44               | 0              | 0.146542                | 0.302541  | 0.031662  |
| 3                | 17               | 0              | -0.579290               | -1.862300 | -0.698864 |
| 4                | 15               | 0              | 2.291618                | -0.551280 | 0.136356  |
| 5                | 6                | 0              | 3.001105                | -0.832424 | -1.536786 |
| 6                | 6                | 0              | 2.458387                | -2.176713 | 0.986158  |
| 7                | 6                | 0              | 3.530937                | 0.509996  | 0.989325  |
| 8                | 6                | 0              | -0.000633               | 0.368640  | 1.844651  |
| 9                | 1                | 0              | 4.016230                | -1.239557 | -1.471485 |
| 10               | 1                | 0              | 3.021302                | 0.118860  | -2.076148 |
| 11               | 1                | 0              | 2.359912                | -1.532399 | -2.080039 |
| 12               | 1                | 0              | 1.806433                | -2.902686 | 0.495490  |
| 13               | 1                | 0              | 2.141798                | -2.081297 | 2.029377  |
| 14               | 1                | 0              | 3.497222                | -2.523825 | 0.958816  |
| 15               | 1                | 0              | 3.551356                | 1.489034  | 0.505808  |
| 16               | 1                | 0              | 4.525122                | 0.051026  | 0.954139  |
| 17               | 1                | 0              | 3.239989                | 0.650037  | 2.034941  |
| 18               | 1                | 0              | 0.750395                | 0.051148  | 2.577957  |
| 19               | 1                | 0              | -0.928143               | 0.768653  | 2.270698  |
| 20               | 6                | 0              | -1.899377               | 1.719508  | -0.220617 |
| 21               | 6                | 0              | -2.579653               | 0.721847  | -0.046121 |
| 22               | 6                | 0              | -3.511551               | -0.393220 | 0.178171  |
| 23               | 6                | 0              | -4.539626               | -0.017855 | 1.266451  |
| 24               | 6                | 0              | -4.195478               | -0.803198 | -1.142645 |
| 25               | 1                | 0              | -1.465720               | 2.676870  | -0.414201 |
| 26               | 1                | 0              | -2.923108               | -1.250539 | 0.525229  |
| 27               | 1                | 0              | -5.151779               | 0.835038  | 0.953010  |
| 28               | 1                | 0              | -4.046505               | 0.244045  | 2.208250  |
| 29               | 1                | 0              | -5.206271               | -0.867375 | 1.451810  |
| 30               | 1                | 0              | -3.450284               | -1.104569 | -1.883398 |
| 31               | 1                | 0              | -4.785538               | 0.024399  | -1.552388 |
| 32               | 1                | 0              | -4.867513               | -1.649534 | -0.962000 |

---

### TS (3-4) c

Zero-point correction= 0.258096  
 (Hartree/Particle)  
 Thermal correction to Energy= 0.278706  
 Thermal correction to Enthalpy= 0.279651  
 Thermal correction to Gibbs Free Energy= 0.207620

Sum of electronic and zero-point Energies= -1709.760989  
 Sum of electronic and thermal Energies= -1709.740378  
 Sum of electronic and thermal Enthalpies= -1709.739434  
 Sum of electronic and thermal Free Energies= -1709.811464

| Center<br>Number | Atomic<br>Number | Atomic<br>Type | Coordinates (Angstroms) |           |           |
|------------------|------------------|----------------|-------------------------|-----------|-----------|
|                  |                  |                | X                       | Y         | Z         |
| 1                | 17               | 0              | -0.559963               | -2.469373 | -0.060947 |
| 2                | 44               | 0              | -0.097719               | -0.039918 | -0.135760 |
| 3                | 6                | 0              | 1.606926                | -0.656724 | -1.222571 |
| 4                | 17               | 0              | 0.191165                | 2.346994  | -0.435166 |
| 5                | 15               | 0              | -2.468015               | 0.182108  | 0.122528  |
| 6                | 6                | 0              | -3.299555               | -0.425936 | -1.404105 |
| 7                | 6                | 0              | -3.128156               | 1.880864  | 0.370904  |
| 8                | 6                | 0              | -3.206070               | -0.804061 | 1.487097  |
| 9                | 6                | 0              | 2.274258                | -0.405132 | -0.180627 |
| 10               | 6                | 0              | 0.874712                | -0.132850 | 1.439238  |
| 11               | 6                | 0              | 3.573040                | -0.111768 | 0.500832  |
| 12               | 6                | 0              | 4.677939                | -0.929698 | -0.199116 |
| 13               | 6                | 0              | 3.887980                | 1.397412  | 0.482324  |
| 14               | 1                | 0              | 1.581709                | -0.995565 | -2.242755 |
| 15               | 1                | 0              | -4.388496               | -0.357325 | -1.304110 |
| 16               | 1                | 0              | -3.005611               | -1.466041 | -1.568030 |
| 17               | 1                | 0              | -2.983456               | 0.174540  | -2.263094 |
| 18               | 1                | 0              | -2.773577               | 2.526199  | -0.435734 |
| 19               | 1                | 0              | -2.741744               | 2.287419  | 1.309620  |
| 20               | 1                | 0              | -4.223659               | 1.870767  | 0.399208  |
| 21               | 1                | 0              | -2.876776               | -1.840055 | 1.381086  |
| 22               | 1                | 0              | -4.299883               | -0.744047 | 1.459700  |
| 23               | 1                | 0              | -2.849125               | -0.417837 | 2.446661  |
| 24               | 1                | 0              | 1.241798                | 0.777486  | 1.923158  |
| 25               | 1                | 0              | 1.029112                | -1.077526 | 1.969420  |
| 26               | 1                | 0              | 3.519634                | -0.444025 | 1.545128  |
| 27               | 1                | 0              | 4.776510                | -0.629535 | -1.247930 |
| 28               | 1                | 0              | 4.463941                | -2.002150 | -0.163931 |
| 29               | 1                | 0              | 5.636791                | -0.749532 | 0.299722  |
| 30               | 1                | 0              | 3.079633                | 1.988038  | 0.921042  |
| 31               | 1                | 0              | 4.025530                | 1.745020  | -0.546525 |
| 32               | 1                | 0              | 4.810648                | 1.586734  | 1.042951  |

#### 4c

Zero-point correction= 0.262138  
 (Hartree/Particle)  
 Thermal correction to Energy= 0.282068  
 Thermal correction to Enthalpy= 0.283012  
 Thermal correction to Gibbs Free Energy= 0.212567  
 Sum of electronic and zero-point Energies= -1709.802564  
 Sum of electronic and thermal Energies= -1709.782634  
 Sum of electronic and thermal Enthalpies= -1709.781690  
 Sum of electronic and thermal Free Energies= -1709.852134

| Center<br>Number | Atomic<br>Number | Atomic<br>Type | Coordinates (Angstroms) |           |           |
|------------------|------------------|----------------|-------------------------|-----------|-----------|
|                  |                  |                | X                       | Y         | Z         |
| 1                | 17               | 0              | -0.890294               | -2.431562 | -0.209008 |
| 2                | 44               | 0              | 0.003270                | -0.096694 | -0.394950 |

|    |    |   |           |           |           |
|----|----|---|-----------|-----------|-----------|
| 3  | 6  | 0 | 1.521063  | -1.266974 | -0.566597 |
| 4  | 17 | 0 | 0.360803  | 2.190130  | -0.823637 |
| 5  | 15 | 0 | -2.324498 | 0.323807  | 0.223750  |
| 6  | 6  | 0 | -3.584601 | -0.302031 | -0.968589 |
| 7  | 6  | 0 | -2.785365 | 2.099801  | 0.420012  |
| 8  | 6  | 0 | -2.823287 | -0.412010 | 1.837219  |
| 9  | 6  | 0 | 2.050008  | -0.634982 | 0.533307  |
| 10 | 6  | 0 | 0.955185  | -0.296467 | 1.460106  |
| 11 | 6  | 0 | 3.493456  | -0.155044 | 0.660153  |
| 12 | 6  | 0 | 4.353952  | -0.554611 | -0.546247 |
| 13 | 6  | 0 | 3.591214  | 1.356881  | 0.938543  |
| 14 | 1  | 0 | 1.861707  | -1.962435 | -1.322907 |
| 15 | 1  | 0 | -4.599212 | -0.099239 | -0.607449 |
| 16 | 1  | 0 | -3.445622 | -1.377249 | -1.101498 |
| 17 | 1  | 0 | -3.445737 | 0.191587  | -1.935812 |
| 18 | 1  | 0 | -2.623303 | 2.627855  | -0.522407 |
| 19 | 1  | 0 | -2.144007 | 2.564198  | 1.173335  |
| 20 | 1  | 0 | -3.835152 | 2.189595  | 0.722103  |
| 21 | 1  | 0 | -2.648505 | -1.489372 | 1.808624  |
| 22 | 1  | 0 | -3.880494 | -0.209799 | 2.042974  |
| 23 | 1  | 0 | -2.214022 | 0.022898  | 2.635322  |
| 24 | 1  | 0 | 1.076961  | 0.594864  | 2.075275  |
| 25 | 1  | 0 | 0.500471  | -1.136385 | 1.985239  |
| 26 | 1  | 0 | 3.881153  | -0.682287 | 1.547387  |
| 27 | 1  | 0 | 4.002653  | -0.059049 | -1.459204 |
| 28 | 1  | 0 | 4.340679  | -1.637248 | -0.715137 |
| 29 | 1  | 0 | 5.395040  | -0.256559 | -0.382844 |
| 30 | 1  | 0 | 3.052770  | 1.643279  | 1.846895  |
| 31 | 1  | 0 | 3.177204  | 1.933971  | 0.106922  |
| 32 | 1  | 0 | 4.642649  | 1.635751  | 1.072226  |

### 3d

Zero-point correction= 0.229940  
(Hartree/Particle)  
Thermal correction to Energy= 0.250513  
Thermal correction to Enthalpy= 0.251457  
Thermal correction to Gibbs Free Energy= 0.179950  
Sum of electronic and zero-point Energies= -1670.512019  
Sum of electronic and thermal Energies= -1670.491446  
Sum of electronic and thermal Enthalpies= -1670.490502  
Sum of electronic and thermal Free Energies= -1670.562009

| Center<br>Number | Atomic<br>Number | Atomic<br>Type | Coordinates (Angstroms) |           |           |
|------------------|------------------|----------------|-------------------------|-----------|-----------|
|                  |                  |                | X                       | Y         | Z         |
| 1                | 17               | 0              | 0.127617                | -2.154128 | -0.963285 |
| 2                | 44               | 0              | 0.259835                | 0.010510  | 0.063580  |
| 3                | 15               | 0              | -2.058540               | -0.025193 | 0.084949  |
| 4                | 6                | 0              | -2.769911               | 0.146310  | -1.601875 |
| 5                | 6                | 0              | -2.876038               | 1.300492  | 1.068874  |
| 6                | 6                | 0              | -2.816540               | -1.567290 | 0.748924  |
| 7                | 6                | 0              | 0.349051                | -0.150932 | 1.875104  |
| 8                | 1                | 0              | -3.864696               | 0.110453  | -1.575369 |
| 9                | 1                | 0              | -2.390587               | -0.667414 | -2.226245 |
| 10               | 1                | 0              | -2.443790               | 1.099506  | -2.027323 |
| 11               | 1                | 0              | -2.538819               | 2.273520  | 0.705849  |

|    |    |   |           |           |           |
|----|----|---|-----------|-----------|-----------|
| 12 | 1  | 0 | -2.590935 | 1.207884  | 2.121489  |
| 13 | 1  | 0 | -3.966136 | 1.225247  | 0.988262  |
| 14 | 1  | 0 | -2.455544 | -2.419843 | 0.169938  |
| 15 | 1  | 0 | -3.909650 | -1.513350 | 0.698413  |
| 16 | 1  | 0 | -2.514388 | -1.706662 | 1.791519  |
| 17 | 1  | 0 | -0.496993 | -0.222475 | 2.569307  |
| 18 | 1  | 0 | 1.338760  | -0.164680 | 2.346757  |
| 19 | 6  | 0 | 2.808071  | -0.627525 | 0.152942  |
| 20 | 6  | 0 | 2.835498  | 0.578241  | -0.046650 |
| 21 | 6  | 0 | 3.081052  | -2.045225 | 0.410642  |
| 22 | 6  | 0 | 3.207831  | 1.979205  | -0.268631 |
| 23 | 1  | 0 | 4.156015  | -2.179776 | 0.583314  |
| 24 | 1  | 0 | 2.775419  | -2.665022 | -0.435373 |
| 25 | 1  | 0 | 2.541044  | -2.404051 | 1.293037  |
| 26 | 1  | 0 | 2.823773  | 2.349687  | -1.222640 |
| 27 | 1  | 0 | 4.301814  | 2.060930  | -0.270777 |
| 28 | 1  | 0 | 2.806424  | 2.629733  | 0.513408  |
| 29 | 17 | 0 | 0.046477  | 2.343665  | -0.456202 |

### 3d'

|                                              |              |
|----------------------------------------------|--------------|
| Zero-point correction=                       | 0.230794     |
| (Hartree/Particle)                           |              |
| Thermal correction to Energy=                | 0.250579     |
| Thermal correction to Enthalpy=              | 0.251523     |
| Thermal correction to Gibbs Free Energy=     | 0.183197     |
| Sum of electronic and zero-point Energies=   | -1670.508507 |
| Sum of electronic and thermal Energies=      | -1670.488722 |
| Sum of electronic and thermal Enthalpies=    | -1670.487778 |
| Sum of electronic and thermal Free Energies= | -1670.556104 |

| Center<br>Number | Atomic<br>Number | Atomic<br>Type | Coordinates (Angstroms) |           |           |
|------------------|------------------|----------------|-------------------------|-----------|-----------|
|                  |                  |                | X                       | Y         | Z         |
| 1                | 17               | 0              | 0.220207                | 2.481200  | -0.191638 |
| 2                | 44               | 0              | 0.398531                | 0.015376  | -0.190551 |
| 3                | 6                | 0              | 2.418426                | 0.519311  | 0.404978  |
| 4                | 17               | 0              | -0.095258               | -2.426607 | -0.200060 |
| 5                | 15               | 0              | -1.998419               | 0.065722  | 0.275168  |
| 6                | 6                | 0              | -2.266796               | -0.630923 | 1.960023  |
| 7                | 6                | 0              | -3.081014               | -0.936311 | -0.824448 |
| 8                | 6                | 0              | -2.863910               | 1.687839  | 0.332500  |
| 9                | 6                | 0              | 2.343673                | -0.735015 | 0.378320  |
| 10               | 6                | 0              | 0.195962                | 0.044412  | -2.003610 |
| 11               | 6                | 0              | 3.137185                | 1.797400  | 0.571853  |
| 12               | 6                | 0              | 2.908707                | -2.094116 | 0.494543  |
| 13               | 1                | 0              | -3.333108               | -0.633797 | 2.212186  |
| 14               | 1                | 0              | -1.729230               | -0.025106 | 2.696688  |
| 15               | 1                | 0              | -1.875196               | -1.650634 | 1.984435  |
| 16               | 1                | 0              | -2.656098               | -1.935869 | -0.929060 |
| 17               | 1                | 0              | -3.124497               | -0.460626 | -1.809163 |
| 18               | 1                | 0              | -4.093571               | -0.996104 | -0.410236 |
| 19               | 1                | 0              | -2.384190               | 2.341409  | 1.062932  |
| 20               | 1                | 0              | -3.916020               | 1.531151  | 0.597558  |
| 21               | 1                | 0              | -2.795728               | 2.177711  | -0.641561 |
| 22               | 1                | 0              | 0.108434                | -0.887389 | -2.570699 |
| 23               | 1                | 0              | 0.221815                | 0.986777  | -2.558271 |

|    |   |   |          |           |           |
|----|---|---|----------|-----------|-----------|
| 24 | 1 | 0 | 4.165443 | 1.589215  | 0.893271  |
| 25 | 1 | 0 | 2.647749 | 2.439619  | 1.307804  |
| 26 | 1 | 0 | 3.159429 | 2.355317  | -0.368534 |
| 27 | 1 | 0 | 2.358955 | -2.694939 | 1.222855  |
| 28 | 1 | 0 | 3.959494 | -2.019245 | 0.801210  |
| 29 | 1 | 0 | 2.849681 | -2.623494 | -0.460762 |

**TS (3-4) d**

Zero-point correction= 0.229852  
(Hartree/Particle)  
Thermal correction to Energy= 0.249393  
Thermal correction to Enthalpy= 0.250337  
Thermal correction to Gibbs Free Energy= 0.181502  
Sum of electronic and zero-point Energies= -1670.488452  
Sum of electronic and thermal Energies= -1670.468910  
Sum of electronic and thermal Enthalpies= -1670.467966  
Sum of electronic and thermal Free Energies= -1670.536802

| Center<br>Number | Atomic<br>Number | Atomic<br>Type | Coordinates (Angstroms) |           |           |
|------------------|------------------|----------------|-------------------------|-----------|-----------|
|                  |                  |                | X                       | Y         | Z         |
| 1                | 17               | 0              | 0.002644                | -2.387540 | -0.332787 |
| 2                | 44               | 0              | -0.258176               | 0.058064  | -0.039116 |
| 3                | 6                | 0              | -2.164811               | -0.492397 | 0.779159  |
| 4                | 17               | 0              | -0.414055               | 2.411577  | 0.513858  |
| 5                | 15               | 0              | 2.132435                | 0.092348  | -0.012215 |
| 6                | 6                | 0              | 2.748118                | -0.740125 | 1.511915  |
| 7                | 6                | 0              | 2.944247                | 1.743131  | 0.000610  |
| 8                | 6                | 0              | 2.943973                | -0.807190 | -1.395610 |
| 9                | 6                | 0              | -2.622291               | -0.035419 | -0.304081 |
| 10               | 6                | 0              | -1.012793               | 0.224434  | -1.720643 |
| 11               | 6                | 0              | -2.316414               | -1.104457 | 2.113473  |
| 12               | 6                | 0              | -3.726328               | 0.567137  | -1.088859 |
| 13               | 1                | 0              | 3.843582                | -0.752670 | 1.532743  |
| 14               | 1                | 0              | 2.365086                | -1.763944 | 1.527342  |
| 15               | 1                | 0              | 2.382554                | -0.208853 | 2.396483  |
| 16               | 1                | 0              | 2.548464                | 2.332425  | 0.830855  |
| 17               | 1                | 0              | 2.699592                | 2.274448  | -0.923365 |
| 18               | 1                | 0              | 4.031954                | 1.641611  | 0.087709  |
| 19               | 1                | 0              | 2.513304                | -1.809229 | -1.454879 |
| 20               | 1                | 0              | 4.027252                | -0.863751 | -1.240220 |
| 21               | 1                | 0              | 2.743337                | -0.282468 | -2.334708 |
| 22               | 1                | 0              | -1.238614               | 1.210953  | -2.138695 |
| 23               | 1                | 0              | -1.184162               | -0.640839 | -2.369045 |
| 24               | 1                | 0              | -3.378223               | -1.233110 | 2.356591  |
| 25               | 1                | 0              | -1.855789               | -0.478375 | 2.886075  |
| 26               | 1                | 0              | -1.827837               | -2.084369 | 2.122974  |
| 27               | 1                | 0              | -3.589607               | 1.650826  | -1.173369 |
| 28               | 1                | 0              | -4.668499               | 0.382296  | -0.559785 |
| 29               | 1                | 0              | -3.807408               | 0.145687  | -2.096378 |

**4d**

Zero-point correction= 0.233071  
(Hartree/Particle)

Thermal correction to Energy= 0.252232  
 Thermal correction to Enthalpy= 0.253176  
 Thermal correction to Gibbs Free Energy= 0.185290  
 Sum of electronic and zero-point Energies= -1670.536782  
 Sum of electronic and thermal Energies= -1670.517622  
 Sum of electronic and thermal Enthalpies= -1670.516678  
 Sum of electronic and thermal Free Energies= -1670.584564

| Center<br>Number | Atomic<br>Number | Atomic<br>Type | Coordinates (Angstroms) |           |           |
|------------------|------------------|----------------|-------------------------|-----------|-----------|
|                  |                  |                | X                       | Y         | Z         |
| 1                | 17               | 0              | -0.172157               | -2.381939 | 0.102993  |
| 2                | 44               | 0              | 0.343859                | 0.036071  | -0.201133 |
| 3                | 6                | 0              | 2.115506                | -0.678863 | -0.323109 |
| 4                | 17               | 0              | 0.357552                | 2.356400  | -0.677243 |
| 5                | 15               | 0              | -2.141017               | 0.105937  | 0.057773  |
| 6                | 6                | 0              | -3.070447               | -0.843158 | -1.223310 |
| 7                | 6                | 0              | -2.937577               | 1.769399  | -0.004155 |
| 8                | 6                | 0              | -2.751401               | -0.590408 | 1.652197  |
| 9                | 6                | 0              | 2.324648                | 0.096153  | 0.813748  |
| 10               | 6                | 0              | 1.187164                | 0.059879  | 1.724896  |
| 11               | 6                | 0              | 2.915316                | -1.472346 | -1.271750 |
| 12               | 6                | 0              | 3.401365                | 1.156425  | 0.889121  |
| 13               | 1                | 0              | -4.147850               | -0.822321 | -1.023977 |
| 14               | 1                | 0              | -2.713310               | -1.875665 | -1.225675 |
| 15               | 1                | 0              | -2.882905               | -0.404963 | -2.209008 |
| 16               | 1                | 0              | -2.714699               | 2.244410  | -0.962678 |
| 17               | 1                | 0              | -2.521760               | 2.404514  | 0.782269  |
| 18               | 1                | 0              | -4.022620               | 1.684287  | 0.125046  |
| 19               | 1                | 0              | -2.366323               | -1.606485 | 1.762285  |
| 20               | 1                | 0              | -3.846941               | -0.599734 | 1.682407  |
| 21               | 1                | 0              | -2.375786               | 0.019167  | 2.479964  |
| 22               | 1                | 0              | 1.040702                | 0.941601  | 2.349349  |
| 23               | 1                | 0              | 0.932457                | -0.885319 | 2.199847  |
| 24               | 1                | 0              | 3.987615                | -1.259181 | -1.174478 |
| 25               | 1                | 0              | 2.594870                | -1.319018 | -2.306975 |
| 26               | 1                | 0              | 2.757511                | -2.533887 | -1.032655 |
| 27               | 1                | 0              | 2.941110                | 2.149594  | 0.926173  |
| 28               | 1                | 0              | 4.072252                | 1.123164  | 0.025789  |
| 29               | 1                | 0              | 3.991965                | 1.015347  | 1.802016  |

## 5b

Zero-point correction= 0.200666  
 (Hartree/Particle)  
 Thermal correction to Energy= 0.219595  
 Thermal correction to Enthalpy= 0.220539  
 Thermal correction to Gibbs Free Energy= 0.153316  
 Sum of electronic and zero-point Energies= -1631.221133  
 Sum of electronic and thermal Energies= -1631.202205  
 Sum of electronic and thermal Enthalpies= -1631.201261  
 Sum of electronic and thermal Free Energies= -1631.268483

| Center<br>Number | Atomic<br>Number | Atomic<br>Type | Coordinates (Angstroms) |           |           |
|------------------|------------------|----------------|-------------------------|-----------|-----------|
|                  |                  |                | X                       | Y         | Z         |
| 1                | 17               | 0              | 0.817728                | -1.976480 | -0.822072 |



|    |    |   |           |           |           |
|----|----|---|-----------|-----------|-----------|
| 2  | 44 | 0 | 0.370797  | 0.213328  | 0.044873  |
| 3  | 6  | 0 | 3.092520  | 0.297976  | 0.049728  |
| 4  | 17 | 0 | -0.363174 | 2.427570  | -0.562117 |
| 5  | 15 | 0 | -1.867740 | -0.376830 | 0.094053  |
| 6  | 6  | 0 | -2.586138 | -0.467263 | -1.596739 |
| 7  | 6  | 0 | -2.976926 | 0.775614  | 1.005890  |
| 8  | 6  | 0 | -2.241930 | -2.015420 | 0.846944  |
| 9  | 6  | 0 | 2.559643  | 1.371751  | -0.173733 |
| 10 | 6  | 0 | 0.506846  | 0.159928  | 1.859289  |
| 11 | 6  | 0 | 3.828821  | -0.936886 | 0.302260  |
| 12 | 1  | 0 | -3.646956 | -0.739448 | -1.563497 |
| 13 | 1  | 0 | -2.034354 | -1.213033 | -2.176063 |
| 14 | 1  | 0 | -2.474150 | 0.507845  | -2.079277 |
| 15 | 1  | 0 | -2.876632 | 1.776348  | 0.580392  |
| 16 | 1  | 0 | -2.678578 | 0.818923  | 2.057857  |
| 17 | 1  | 0 | -4.018709 | 0.442307  | 0.944011  |
| 18 | 1  | 0 | -1.679014 | -2.787502 | 0.318273  |
| 19 | 1  | 0 | -3.314872 | -2.230898 | 0.796765  |
| 20 | 1  | 0 | -1.927841 | -2.018432 | 1.895398  |
| 21 | 1  | 0 | 2.271569  | 2.380567  | -0.377526 |
| 22 | 1  | 0 | -0.284371 | -0.108001 | 2.569593  |
| 23 | 1  | 0 | 1.467498  | 0.430032  | 2.313848  |
| 24 | 1  | 0 | 4.890045  | -0.787691 | 0.070950  |
| 25 | 1  | 0 | 3.437756  | -1.747805 | -0.318659 |
| 26 | 1  | 0 | 3.745202  | -1.239922 | 1.352085  |

## ET (5-6)b

Zero-point correction= 0.200522  
(Hartree/Particle)  
Thermal correction to Energy= 0.218704  
Thermal correction to Enthalpy= 0.219648  
Thermal correction to Gibbs Free Energy= 0.153243  
Sum of electronic and zero-point Energies= -1631.195305  
Sum of electronic and thermal Energies= -1631.177123  
Sum of electronic and thermal Enthalpies= -1631.176179  
Sum of electronic and thermal Free Energies= -1631.242584

| Center<br>Number | Atomic<br>Number | Atomic<br>Type | Coordinates (Angstroms) |           |           |
|------------------|------------------|----------------|-------------------------|-----------|-----------|
|                  |                  |                | X                       | Y         | Z         |
| 1                | 17               | 0              | -0.399234               | -2.383861 | -0.154580 |
| 2                | 44               | 0              | -0.431440               | 0.077001  | -0.188066 |
| 3                | 6                | 0              | -2.515648               | -0.110755 | 0.433921  |
| 4                | 17               | 0              | -0.441707               | 2.483578  | 0.141352  |
| 5                | 15               | 0              | 1.922270                | -0.026670 | 0.159660  |
| 6                | 6                | 0              | 2.231391                | -0.580287 | 1.890132  |
| 7                | 6                | 0              | 2.872515                | 1.537342  | -0.015054 |
| 8                | 6                | 0              | 2.829970                | -1.238339 | -0.883581 |
| 9                | 6                | 0              | -2.705614               | 0.121683  | -0.781618 |
| 10               | 6                | 0              | -0.896929               | 0.151940  | -1.977825 |
| 11               | 6                | 0              | -2.872842               | -0.395048 | 1.833817  |
| 12               | 1                | 0              | 3.306078                | -0.669901 | 2.084015  |
| 13               | 1                | 0              | 1.748871                | -1.550700 | 2.036480  |
| 14               | 1                | 0              | 1.803030                | 0.142510  | 2.591629  |
| 15               | 1                | 0              | 2.413138                | 2.306441  | 0.609648  |
| 16               | 1                | 0              | 2.817195                | 1.879111  | -1.052722 |
| 17               | 1                | 0              | 3.921801                | 1.389261  | 0.263749  |
| 18               | 1                | 0              | 2.335377                | -2.208686 | -0.799282 |

|    |   |   |           |           |           |
|----|---|---|-----------|-----------|-----------|
| 19 | 1 | 0 | 3.876934  | -1.312099 | -0.568699 |
| 20 | 1 | 0 | 2.791743  | -0.917151 | -1.928943 |
| 21 | 1 | 0 | -3.299775 | 0.392081  | -1.632521 |
| 22 | 1 | 0 | -0.997083 | 1.111330  | -2.497302 |
| 23 | 1 | 0 | -1.036066 | -0.754795 | -2.575964 |
| 24 | 1 | 0 | -3.962744 | -0.424659 | 1.948446  |
| 25 | 1 | 0 | -2.471971 | 0.379032  | 2.497220  |
| 26 | 1 | 0 | -2.458244 | -1.364190 | 2.130391  |

## 6b

Zero-point correction= 0.204439  
(Hartree/Particle)  
Thermal correction to Energy= 0.222101  
Thermal correction to Enthalpy= 0.223045  
Thermal correction to Gibbs Free Energy= 0.157791  
Sum of electronic and zero-point Energies= -1631.245221  
Sum of electronic and thermal Energies= -1631.227559  
Sum of electronic and thermal Enthalpies= -1631.226615  
Sum of electronic and thermal Free Energies= -1631.291869

| Center<br>Number | Atomic<br>Number | Atomic<br>Type | Coordinates (Angstroms) |           |           |
|------------------|------------------|----------------|-------------------------|-----------|-----------|
|                  |                  |                | X                       | Y         | Z         |
| 1                | 17               | 0              | 0.334028                | -2.299508 | 0.036122  |
| 2                | 44               | 0              | 0.521165                | 0.182246  | -0.063029 |
| 3                | 6                | 0              | 2.375156                | -0.234807 | -0.211588 |
| 4                | 17               | 0              | 0.250252                | 2.516817  | -0.322450 |
| 5                | 15               | 0              | -1.975130               | -0.113153 | -0.062899 |
| 6                | 6                | 0              | -2.609929               | -1.052449 | -1.518558 |
| 7                | 6                | 0              | -2.994623               | 1.425098  | -0.079205 |
| 8                | 6                | 0              | -2.635367               | -1.040503 | 1.386654  |
| 9                | 6                | 0              | 2.404220                | 0.421967  | 1.014706  |
| 10               | 6                | 0              | 1.297345                | 0.129835  | 1.902256  |
| 11               | 6                | 0              | 3.320043                | -0.740732 | -1.218206 |
| 12               | 1                | 0              | -3.693551               | -1.199696 | -1.449493 |
| 13               | 1                | 0              | -2.106077               | -2.021174 | -1.559335 |
| 14               | 1                | 0              | -2.384101               | -0.500626 | -2.436788 |
| 15               | 1                | 0              | -2.741120               | 2.022417  | -0.958549 |
| 16               | 1                | 0              | -2.763671               | 2.026339  | 0.804134  |
| 17               | 1                | 0              | -4.063581               | 1.182918  | -0.090070 |
| 18               | 1                | 0              | -2.119291               | -2.000628 | 1.455155  |
| 19               | 1                | 0              | -3.715053               | -1.201154 | 1.289873  |
| 20               | 1                | 0              | -2.438042               | -0.470127 | 2.299500  |
| 21               | 1                | 0              | 2.974801                | 1.352993  | 1.109188  |
| 22               | 1                | 0              | 1.008075                | 0.919198  | 2.593842  |
| 23               | 1                | 0              | 1.167292                | -0.885496 | 2.268710  |
| 24               | 1                | 0              | 4.304035                | -0.264871 | -1.113568 |
| 25               | 1                | 0              | 2.942956                | -0.606864 | -2.236332 |
| 26               | 1                | 0              | 3.449208                | -1.819483 | -1.048303 |

## 5c

Zero-point correction= 0.258167  
(Hartree/Particle)  
Thermal correction to Energy= 0.279645

Thermal correction to Enthalpy= 0.280589  
 Thermal correction to Gibbs Free Energy= 0.207420  
 Sum of electronic and zero-point Energies= -1709.790076  
 Sum of electronic and thermal Energies= -1709.768598  
 Sum of electronic and thermal Enthalpies= -1709.767654  
 Sum of electronic and thermal Free Energies= -1709.840823

| Center<br>Number | Atomic<br>Number | Atomic<br>Type | Coordinates (Angstroms) |           |           |
|------------------|------------------|----------------|-------------------------|-----------|-----------|
|                  |                  |                | X                       | Y         | Z         |
| 1                | 17               | 0              | 1.115498                | 2.449299  | -0.396073 |
| 2                | 44               | 0              | 0.126854                | 0.297397  | 0.047296  |
| 3                | 17               | 0              | -0.551209               | -1.767221 | -0.966176 |
| 4                | 15               | 0              | 2.285665                | -0.543216 | 0.050994  |
| 5                | 6                | 0              | 3.011088                | -0.558840 | -1.639448 |
| 6                | 6                | 0              | 2.473791                | -2.275368 | 0.648925  |
| 7                | 6                | 0              | 3.504760                | 0.392907  | 1.065234  |
| 8                | 6                | 0              | -0.030744               | 0.129643  | 1.852772  |
| 9                | 1                | 0              | 4.033913                | -0.951675 | -1.628723 |
| 10               | 1                | 0              | 3.015812                | 0.462546  | -2.030467 |
| 11               | 1                | 0              | 2.386960                | -1.181501 | -2.286851 |
| 12               | 1                | 0              | 1.841672                | -2.930853 | 0.046090  |
| 13               | 1                | 0              | 2.143920                | -2.343626 | 1.690132  |
| 14               | 1                | 0              | 3.519209                | -2.596640 | 0.584630  |
| 15               | 1                | 0              | 3.514848                | 1.434548  | 0.737141  |
| 16               | 1                | 0              | 4.505302                | -0.042513 | 0.967100  |
| 17               | 1                | 0              | 3.207562                | 0.366310  | 2.118136  |
| 18               | 1                | 0              | -0.963841               | 0.464232  | 2.320290  |
| 19               | 1                | 0              | 0.720607                | -0.269552 | 2.544600  |
| 20               | 6                | 0              | -2.581036               | 0.719271  | -0.053548 |
| 21               | 6                | 0              | -1.899923               | 1.730764  | 0.003253  |
| 22               | 6                | 0              | -3.532863               | -0.397706 | -0.127535 |
| 23               | 6                | 0              | -4.879041               | 0.112957  | -0.687095 |
| 24               | 6                | 0              | -3.709342               | -1.090197 | 1.238235  |
| 25               | 1                | 0              | -1.476085               | 2.711595  | 0.024035  |
| 26               | 1                | 0              | -3.117495               | -1.131831 | -0.827783 |
| 27               | 1                | 0              | -4.749264               | 0.577554  | -1.669348 |
| 28               | 1                | 0              | -5.330704               | 0.850814  | -0.014747 |
| 29               | 1                | 0              | -5.574265               | -0.727414 | -0.790810 |
| 30               | 1                | 0              | -4.095967               | -0.389870 | 1.987658  |
| 31               | 1                | 0              | -2.759649               | -1.498824 | 1.594961  |
| 32               | 1                | 0              | -4.422145               | -1.916411 | 1.141502  |

### 5c'

Zero-point correction= 0.259180  
 (Hartree/Particle)  
 Thermal correction to Energy= 0.280054  
 Thermal correction to Enthalpy= 0.280999  
 Thermal correction to Gibbs Free Energy= 0.209786  
 Sum of electronic and zero-point Energies= -1709.785231  
 Sum of electronic and thermal Energies= -1709.764356  
 Sum of electronic and thermal Enthalpies= -1709.763412  
 Sum of electronic and thermal Free Energies= -1709.834625

| Center<br>Number | Atomic<br>Number | Atomic<br>Type | Coordinates (Angstroms) |   |   |
|------------------|------------------|----------------|-------------------------|---|---|
|                  |                  |                | X                       | Y | Z |

|    |    |   |           |           |           |
|----|----|---|-----------|-----------|-----------|
| 1  | 17 | 0 | -0.589359 | -1.976988 | -0.646632 |
| 2  | 44 | 0 | 0.005817  | 0.393928  | -0.200970 |
| 3  | 17 | 0 | 1.119224  | 2.556143  | 0.288114  |
| 4  | 15 | 0 | 2.157020  | -0.622189 | 0.257552  |
| 5  | 6  | 0 | 2.004985  | -1.559614 | 1.836935  |
| 6  | 6  | 0 | 3.608084  | 0.473147  | 0.525097  |
| 7  | 6  | 0 | 2.786842  | -1.852401 | -0.956595 |
| 8  | 6  | 0 | 0.367759  | 0.642836  | -1.969966 |
| 9  | 1  | 0 | 2.954974  | -2.040403 | 2.095909  |
| 10 | 1  | 0 | 1.225226  | -2.316828 | 1.722056  |
| 11 | 1  | 0 | 1.721531  | -0.875823 | 2.643542  |
| 12 | 1  | 0 | 3.397071  | 1.182855  | 1.326413  |
| 13 | 1  | 0 | 3.805667  | 1.049614  | -0.382024 |
| 14 | 1  | 0 | 4.484636  | -0.135348 | 0.775185  |
| 15 | 1  | 0 | 2.003870  | -2.581713 | -1.170337 |
| 16 | 1  | 0 | 3.675668  | -2.355651 | -0.560192 |
| 17 | 1  | 0 | 3.052299  | -1.334220 | -1.883366 |
| 18 | 1  | 0 | 0.127470  | -0.132384 | -2.704614 |
| 19 | 1  | 0 | 0.772469  | 1.592381  | -2.332551 |
| 20 | 6  | 0 | -2.186828 | 0.523937  | 0.219765  |
| 21 | 6  | 0 | -1.621223 | 1.603471  | 0.493377  |
| 22 | 6  | 0 | -3.319727 | -0.421994 | 0.072628  |
| 23 | 6  | 0 | -4.590361 | 0.359630  | -0.318721 |
| 24 | 6  | 0 | -3.520337 | -1.226784 | 1.372490  |
| 25 | 1  | 0 | -1.472925 | 2.622561  | 0.793234  |
| 26 | 1  | 0 | -3.072066 | -1.131952 | -0.722158 |
| 27 | 1  | 0 | -4.444220 | 0.917912  | -1.249113 |
| 28 | 1  | 0 | -4.873627 | 1.070083  | 0.466013  |
| 29 | 1  | 0 | -5.422423 | -0.338740 | -0.464611 |
| 30 | 1  | 0 | -3.741380 | -0.562248 | 2.215715  |
| 31 | 1  | 0 | -2.626424 | -1.811293 | 1.605024  |
| 32 | 1  | 0 | -4.361937 | -1.917779 | 1.250022  |

### TS (5-6) c

|                                              |              |
|----------------------------------------------|--------------|
| Zero-point correction=                       | 0.257805     |
| (Hartree/Particle)                           |              |
| Thermal correction to Energy=                | 0.278656     |
| Thermal correction to Enthalpy=              | 0.279601     |
| Thermal correction to Gibbs Free Energy=     | 0.206377     |
| Sum of electronic and zero-point Energies=   | -1709.765063 |
| Sum of electronic and thermal Energies=      | -1709.744211 |
| Sum of electronic and thermal Enthalpies=    | -1709.743267 |
| Sum of electronic and thermal Free Energies= | -1709.816491 |

| Center Number | Atomic Number | Atomic Type | Coordinates (Angstroms) |           |           |
|---------------|---------------|-------------|-------------------------|-----------|-----------|
|               |               |             | X                       | Y         | Z         |
| 1             | 17            | 0           | 0.096464                | -2.432504 | -0.197890 |
| 2             | 44            | 0           | 0.037827                | 0.010430  | -0.421186 |
| 3             | 6             | 0           | -2.117828               | -0.064931 | -0.287986 |
| 4             | 17            | 0           | -0.078014               | 2.445701  | -0.306498 |
| 5             | 15            | 0           | 2.225767                | 0.035639  | 0.518531  |
| 6             | 6             | 0           | 2.112999                | -0.441746 | 2.295106  |
| 7             | 6             | 0           | 3.160284                | 1.618689  | 0.519451  |
| 8             | 6             | 0           | 3.385189                | -1.186388 | -0.218874 |
| 9             | 6             | 0           | -2.016872               | -0.093363 | -1.539362 |

|    |   |   |           |           |           |
|----|---|---|-----------|-----------|-----------|
| 10 | 6 | 0 | -0.006710 | -0.022113 | -2.274677 |
| 11 | 6 | 0 | -2.860342 | -0.052514 | 1.002165  |
| 12 | 6 | 0 | -3.838703 | -1.242639 | 1.054800  |
| 13 | 6 | 0 | -3.562050 | 1.307010  | 1.191783  |
| 14 | 1 | 0 | 3.107856  | -0.467541 | 2.753781  |
| 15 | 1 | 0 | 1.649061  | -1.429625 | 2.363060  |
| 16 | 1 | 0 | 1.493283  | 0.282584  | 2.833156  |
| 17 | 1 | 0 | 2.547195  | 2.397829  | 0.977318  |
| 18 | 1 | 0 | 3.362446  | 1.921738  | -0.511781 |
| 19 | 1 | 0 | 4.106942  | 1.506433  | 1.059910  |
| 20 | 1 | 0 | 2.899103  | -2.164812 | -0.222910 |
| 21 | 1 | 0 | 4.321200  | -1.224394 | 0.349552  |
| 22 | 1 | 0 | 3.604454  | -0.900269 | -1.252068 |
| 23 | 1 | 0 | -2.404894 | -0.149206 | -2.537785 |
| 24 | 1 | 0 | -0.025195 | 0.901914  | -2.861813 |
| 25 | 1 | 0 | 0.049550  | -0.964262 | -2.830142 |
| 26 | 1 | 0 | -2.136026 | -0.178298 | 1.817493  |
| 27 | 1 | 0 | -3.307997 | -2.190145 | 0.924812  |
| 28 | 1 | 0 | -4.595538 | -1.156121 | 0.267273  |
| 29 | 1 | 0 | -4.351158 | -1.255682 | 2.023477  |
| 30 | 1 | 0 | -4.329107 | 1.454452  | 0.423604  |
| 31 | 1 | 0 | -2.843989 | 2.129028  | 1.123540  |
| 32 | 1 | 0 | -4.047541 | 1.336517  | 2.173921  |

## 6c

Zero-point correction= 0.262720  
(Hartree/Particle)  
Thermal correction to Energy= 0.283124  
Thermal correction to Enthalpy= 0.284068  
Thermal correction to Gibbs Free Energy= 0.213193  
Sum of electronic and zero-point Energies= -1709.844816  
Sum of electronic and thermal Energies= -1709.824412  
Sum of electronic and thermal Enthalpies= -1709.823468  
Sum of electronic and thermal Free Energies= -1709.894343

| Center<br>Number | Atomic<br>Number | Atomic<br>Type | Coordinates (Angstroms) |           |           |
|------------------|------------------|----------------|-------------------------|-----------|-----------|
|                  |                  |                | X                       | Y         | Z         |
| 1                | 17               | 0              | 0.621032                | -0.606954 | 2.527114  |
| 2                | 44               | 0              | 0.085507                | -0.722598 | 0.211292  |
| 3                | 6                | 0              | -1.492500               | 0.187115  | 0.032294  |
| 4                | 17               | 0              | 0.459949                | -1.794026 | -1.889629 |
| 5                | 15               | 0              | 1.682577                | 0.816530  | -0.257049 |
| 6                | 6                | 0              | 1.756384                | 2.292064  | 0.843080  |
| 7                | 6                | 0              | 1.671806                | 1.518398  | -1.959312 |
| 8                | 6                | 0              | 3.359136                | 0.067786  | -0.099345 |
| 9                | 6                | 0              | -2.437156               | -0.828589 | 0.521224  |
| 10               | 6                | 0              | -2.528206               | -2.079495 | 0.018415  |
| 11               | 6                | 0              | -1.909184               | 1.585867  | -0.332969 |
| 12               | 6                | 0              | -2.642597               | 2.279102  | 0.836473  |
| 13               | 6                | 0              | -2.784873               | 1.558626  | -1.605379 |
| 14               | 1                | 0              | 2.615408                | 2.922317  | 0.586051  |
| 15               | 1                | 0              | 1.836554                | 1.953228  | 1.878691  |
| 16               | 1                | 0              | 0.840348                | 2.881642  | 0.743488  |
| 17               | 1                | 0              | 0.739591                | 2.062977  | -2.134772 |
| 18               | 1                | 0              | 1.728307                | 0.696795  | -2.677141 |
| 19               | 1                | 0              | 2.517570                | 2.201010  | -2.099588 |
| 20               | 1                | 0              | 3.485222                | -0.309380 | 0.919700  |

|    |   |   |           |           |           |
|----|---|---|-----------|-----------|-----------|
| 21 | 1 | 0 | 4.142607  | 0.802290  | -0.317160 |
| 22 | 1 | 0 | 3.440455  | -0.770233 | -0.797739 |
| 23 | 1 | 0 | -2.994210 | -0.580653 | 1.428041  |
| 24 | 1 | 0 | -2.024715 | -2.367892 | -0.899408 |
| 25 | 1 | 0 | -3.139414 | -2.829607 | 0.513258  |
| 26 | 1 | 0 | -1.007872 | 2.167455  | -0.556396 |
| 27 | 1 | 0 | -2.033877 | 2.281202  | 1.746731  |
| 28 | 1 | 0 | -3.592918 | 1.782008  | 1.060239  |
| 29 | 1 | 0 | -2.866653 | 3.317905  | 0.568523  |
| 30 | 1 | 0 | -3.706221 | 0.991713  | -1.432718 |
| 31 | 1 | 0 | -2.253688 | 1.094956  | -2.442983 |
| 32 | 1 | 0 | -3.061010 | 2.580060  | -1.892029 |

## TS (1-7) a

Zero-point correction= 0.286666  
(Hartree/Particle)  
Thermal correction to Energy= 0.311857  
Thermal correction to Enthalpy= 0.312802  
Thermal correction to Gibbs Free Energy= 0.232185  
Sum of electronic and zero-point Energies= -2052.911880  
Sum of electronic and thermal Energies= -2052.886689  
Sum of electronic and thermal Enthalpies= -2052.885745  
Sum of electronic and thermal Free Energies= -2052.966362

| Center<br>Number | Atomic<br>Number | Atomic<br>Type | Coordinates (Angstroms) |           |           |
|------------------|------------------|----------------|-------------------------|-----------|-----------|
|                  |                  |                | X                       | Y         | Z         |
| 1                | 6                | 0              | -0.000345               | 3.131983  | -0.347303 |
| 2                | 6                | 0              | -0.000320               | 3.437662  | -1.517240 |
| 3                | 1                | 0              | -0.000097               | 2.834860  | 0.686020  |
| 4                | 1                | 0              | -0.001546               | 3.718852  | -2.546470 |
| 5                | 6                | 0              | 0.000038                | -0.106070 | -2.142784 |
| 6                | 17               | 0              | 0.000078                | -2.432681 | -0.308202 |
| 7                | 44               | 0              | 0.000037                | -0.026571 | -0.302222 |
| 8                | 17               | 0              | -0.000012               | 0.845777  | 2.179393  |
| 9                | 15               | 0              | 2.385957                | -0.156239 | 0.061628  |
| 10               | 6                | 0              | 3.350251                | -0.925246 | -1.309509 |
| 11               | 6                | 0              | 3.245727                | 1.443766  | 0.377659  |
| 12               | 6                | 0              | 2.817849                | -1.188351 | 1.519103  |
| 13               | 15               | 0              | -2.385892               | -0.156412 | 0.061667  |
| 14               | 6                | 0              | -2.817702               | -1.188613 | 1.519108  |
| 15               | 6                | 0              | -3.245734               | 1.443536  | 0.377797  |
| 16               | 6                | 0              | -3.350213               | -0.925403 | -1.309465 |
| 17               | 1                | 0              | 0.000002                | -1.024592 | -2.745303 |
| 18               | 1                | 0              | 0.000101                | 0.822488  | -2.734680 |
| 19               | 1                | 0              | 3.289299                | -0.297111 | -2.203640 |
| 20               | 1                | 0              | 4.402220                | -1.057445 | -1.032712 |
| 21               | 1                | 0              | 2.907767                | -1.899442 | -1.536841 |
| 22               | 1                | 0              | 2.789686                | 1.911361  | 1.254779  |
| 23               | 1                | 0              | 4.314342                | 1.285897  | 0.562719  |
| 24               | 1                | 0              | 3.120664                | 2.112595  | -0.478926 |
| 25               | 1                | 0              | 3.905084                | -1.239802 | 1.648296  |
| 26               | 1                | 0              | 2.350921                | -0.751680 | 2.405019  |
| 27               | 1                | 0              | 2.409540                | -2.190824 | 1.368180  |
| 28               | 1                | 0              | -2.409377               | -2.191068 | 1.368118  |
| 29               | 1                | 0              | -2.350751               | -0.751980 | 2.405027  |
| 30               | 1                | 0              | -3.904931               | -1.240100 | 1.648341  |

|    |   |   |           |           |           |
|----|---|---|-----------|-----------|-----------|
| 31 | 1 | 0 | -2.789695 | 1.911097  | 1.254936  |
| 32 | 1 | 0 | -3.120708 | 2.112422  | -0.478748 |
| 33 | 1 | 0 | -4.314340 | 1.285610  | 0.562863  |
| 34 | 1 | 0 | -3.289320 | -0.297235 | -2.203576 |
| 35 | 1 | 0 | -2.907721 | -1.899579 | -1.536853 |
| 36 | 1 | 0 | -4.402166 | -1.057646 | -1.032627 |

### TS (1-7)b

Zero-point correction= 0.315421  
(Hartree/Particle)  
Thermal correction to Energy= 0.342408  
Thermal correction to Enthalpy= 0.343352  
Thermal correction to Gibbs Free Energy= 0.256823  
Sum of electronic and zero-point Energies= -2092.209940  
Sum of electronic and thermal Energies= -2092.182953  
Sum of electronic and thermal Enthalpies= -2092.182009  
Sum of electronic and thermal Free Energies= -2092.268538

| Center<br>Number | Atomic<br>Number | Atomic<br>Type | Coordinates (Angstroms) |           |           |
|------------------|------------------|----------------|-------------------------|-----------|-----------|
|                  |                  |                | X                       | Y         | Z         |
| 1                | 6                | 0              | -0.000835               | 2.920359  | 0.898625  |
| 2                | 6                | 0              | -0.001352               | 3.756373  | 0.022324  |
| 3                | 6                | 0              | -0.001949               | 4.770552  | -1.028621 |
| 4                | 1                | 0              | -0.000467               | 2.192811  | 1.688190  |
| 5                | 1                | 0              | 0.882408                | 5.414904  | -0.958183 |
| 6                | 1                | 0              | 0.000192                | 4.311388  | -2.025252 |
| 7                | 1                | 0              | -0.888913               | 5.411555  | -0.960438 |
| 8                | 6                | 0              | -0.000149               | 0.588833  | -1.912067 |
| 9                | 17               | 0              | 0.000791                | -2.306204 | -1.286821 |
| 10               | 44               | 0              | 0.000078                | -0.144247 | -0.225146 |
| 11               | 15               | 0              | 2.383042                | -0.412115 | 0.055716  |
| 12               | 6                | 0              | 3.348418                | -0.579420 | -1.506210 |
| 13               | 6                | 0              | 3.242541                | 0.928452  | 0.983168  |
| 14               | 6                | 0              | 2.797698                | -1.941574 | 0.986084  |
| 15               | 15               | 0              | -2.382744               | -0.413432 | 0.055742  |
| 16               | 6                | 0              | -2.796537               | -1.943258 | 0.985887  |
| 17               | 6                | 0              | -3.242824               | 0.926589  | 0.983439  |
| 18               | 6                | 0              | -3.348142               | -0.580976 | -1.506144 |
| 19               | 1                | 0              | 0.000126                | 0.033567  | -2.860103 |
| 20               | 1                | 0              | -0.000609               | 1.684566  | -2.021909 |
| 21               | 1                | 0              | 3.295890                | 0.354079  | -2.075103 |
| 22               | 1                | 0              | 4.398086                | -0.819911 | -1.303608 |
| 23               | 1                | 0              | 2.898867                | -1.377561 | -2.103714 |
| 24               | 1                | 0              | 2.793531                | 0.997401  | 1.977754  |
| 25               | 1                | 0              | 4.314256                | 0.719342  | 1.077592  |
| 26               | 1                | 0              | 3.101507                | 1.885293  | 0.471820  |
| 27               | 1                | 0              | 3.883141                | -2.052346 | 1.090476  |
| 28               | 1                | 0              | 2.326067                | -1.886968 | 1.970177  |
| 29               | 1                | 0              | 2.384065                | -2.798254 | 0.447575  |
| 30               | 1                | 0              | -2.382396               | -2.799613 | 0.447251  |
| 31               | 1                | 0              | -2.324944               | -1.888531 | 1.969990  |
| 32               | 1                | 0              | -3.881915               | -2.054685 | 1.090254  |
| 33               | 1                | 0              | -2.793677               | 0.995713  | 1.977952  |
| 34               | 1                | 0              | -3.102376               | 1.883540  | 0.472135  |
| 35               | 1                | 0              | -4.314413               | 0.716907  | 1.078020  |
| 36               | 1                | 0              | -3.296075               | 0.352632  | -2.074902 |

|    |    |   |           |           |           |
|----|----|---|-----------|-----------|-----------|
| 37 | 1  | 0 | -2.898278 | -1.378826 | -2.103802 |
| 38 | 1  | 0 | -4.397686 | -0.821970 | -1.303504 |
| 39 | 17 | 0 | 0.000061  | -0.247945 | 2.394289  |

---

### TS (1-9)b

|                                              |              |
|----------------------------------------------|--------------|
| Zero-point correction=                       | 0.315305     |
| (Hartree/Particle)                           |              |
| Thermal correction to Energy=                | 0.342216     |
| Thermal correction to Enthalpy=              | 0.343160     |
| Thermal correction to Gibbs Free Energy=     | 0.257303     |
| Sum of electronic and zero-point Energies=   | -2092.208368 |
| Sum of electronic and thermal Energies=      | -2092.181457 |
| Sum of electronic and thermal Enthalpies=    | -2092.180512 |
| Sum of electronic and thermal Free Energies= | -2092.266370 |

---

| Center<br>Number | Atomic<br>Number | Atomic<br>Type | Coordinates (Angstroms) |           |           |
|------------------|------------------|----------------|-------------------------|-----------|-----------|
|                  |                  |                | X                       | Y         | Z         |
| 1                | 6                | 0              | -0.000003               | 2.904534  | -1.967195 |
| 2                | 6                | 0              | 0.000157                | 3.475633  | -0.899588 |
| 3                | 6                | 0              | 0.000345                | 4.157699  | 0.390185  |
| 4                | 1                | 0              | -0.000145               | 2.477907  | -2.943498 |
| 5                | 1                | 0              | -0.885798               | 4.794814  | 0.496207  |
| 6                | 1                | 0              | 0.000301                | 3.419694  | 1.202062  |
| 7                | 1                | 0              | 0.886678                | 4.794573  | 0.496078  |
| 8                | 6                | 0              | -0.000019               | -0.643426 | -2.112220 |
| 9                | 17               | 0              | -0.000113               | -2.677404 | 0.030928  |
| 10               | 44               | 0              | -0.000019               | -0.295440 | -0.300033 |
| 11               | 15               | 0              | 2.387093                | -0.344007 | 0.057054  |
| 12               | 6                | 0              | 3.357443                | -1.291761 | -1.192567 |
| 13               | 6                | 0              | 3.197878                | 1.309784  | 0.110925  |
| 14               | 6                | 0              | 2.851575                | -1.135306 | 1.648406  |
| 15               | 15               | 0              | -2.387133               | -0.343832 | 0.057072  |
| 16               | 6                | 0              | -2.851671               | -1.135075 | 1.648436  |
| 17               | 6                | 0              | -3.197806               | 1.310013  | 0.110928  |
| 18               | 6                | 0              | -3.357542               | -1.291538 | -1.192540 |
| 19               | 1                | 0              | -0.000068               | -1.644112 | -2.566432 |
| 20               | 1                | 0              | 0.000047                | 0.174742  | -2.849490 |
| 21               | 1                | 0              | 3.265958                | -0.813428 | -2.172659 |
| 22               | 1                | 0              | 4.416451                | -1.350753 | -0.917144 |
| 23               | 1                | 0              | 2.940516                | -2.301000 | -1.257599 |
| 24               | 1                | 0              | 2.743239                | 1.881326  | 0.924654  |
| 25               | 1                | 0              | 4.277138                | 1.221279  | 0.279888  |
| 26               | 1                | 0              | 3.016993                | 1.841856  | -0.827787 |
| 27               | 1                | 0              | 3.939476                | -1.138006 | 1.780914  |
| 28               | 1                | 0              | 2.370826                | -0.586382 | 2.461351  |
| 29               | 1                | 0              | 2.472348                | -2.160629 | 1.649903  |
| 30               | 1                | 0              | -2.472542               | -2.160434 | 1.649938  |
| 31               | 1                | 0              | -2.370860               | -0.586186 | 2.461368  |
| 32               | 1                | 0              | -3.939570               | -1.137673 | 1.780958  |
| 33               | 1                | 0              | -2.743173               | 1.881510  | 0.924692  |
| 34               | 1                | 0              | -3.016835               | 1.842092  | -0.827762 |
| 35               | 1                | 0              | -4.277082               | 1.221577  | 0.279833  |
| 36               | 1                | 0              | -3.266026               | -0.813221 | -2.172637 |
| 37               | 1                | 0              | -2.940674               | -2.300802 | -1.257560 |
| 38               | 1                | 0              | -4.416554               | -1.350463 | -0.917116 |
| 39               | 17               | 0              | 0.000033                | 0.921246  | 2.001000  |

---



## TS (1-7) c

Zero-point correction= 0.373075  
 (Hartree/Particle)  
 Thermal correction to Energy= 0.402338  
 Thermal correction to Enthalpy= 0.403282  
 Thermal correction to Gibbs Free Energy= 0.311518  
 Sum of electronic and zero-point Energies= -2170.779050  
 Sum of electronic and thermal Energies= -2170.749787  
 Sum of electronic and thermal Enthalpies= -2170.748842  
 Sum of electronic and thermal Free Energies= -2170.840606

| Center<br>Number | Atomic<br>Number | Atomic<br>Type | Coordinates (Angstroms) |           |           |
|------------------|------------------|----------------|-------------------------|-----------|-----------|
|                  |                  |                | X                       | Y         | Z         |
| 1                | 6                | 0              | 2.333964                | -0.293425 | 1.263892  |
| 2                | 6                | 0              | 3.244527                | -0.345248 | 0.465461  |
| 3                | 6                | 0              | 4.365791                | -0.405852 | -0.481546 |
| 4                | 6                | 0              | 5.482495                | -1.329776 | 0.048911  |
| 5                | 6                | 0              | 4.905008                | 1.004423  | -0.799103 |
| 6                | 1                | 0              | 1.534912                | -0.246036 | 1.979069  |
| 7                | 1                | 0              | 3.989363                | -0.840981 | -1.420250 |
| 8                | 1                | 0              | 5.101851                | -2.336587 | 0.246717  |
| 9                | 1                | 0              | 5.898897                | -0.934446 | 0.981764  |
| 10               | 1                | 0              | 6.291950                | -1.402424 | -0.686167 |
| 11               | 1                | 0              | 5.297647                | 1.480072  | 0.106152  |
| 12               | 1                | 0              | 4.117628                | 1.646593  | -1.207049 |
| 13               | 1                | 0              | 5.714968                | 0.942608  | -1.534618 |
| 14               | 6                | 0              | 0.377251                | -0.026491 | -1.793243 |
| 15               | 17               | 0              | -2.555923               | 0.261407  | -1.521739 |
| 16               | 44               | 0              | -0.552296               | 0.025257  | -0.206217 |
| 17               | 15               | 0              | -1.089213               | -2.320342 | -0.022212 |
| 18               | 6                | 0              | -1.144985               | -3.253031 | -1.612309 |
| 19               | 6                | 0              | 0.029904                | -3.316229 | 1.051095  |
| 20               | 6                | 0              | -2.760297               | -2.587537 | 0.692696  |
| 21               | 15               | 0              | -0.619093               | 2.417790  | 0.105352  |
| 22               | 6                | 0              | -2.203683               | 2.974627  | 0.850758  |
| 23               | 6                | 0              | 0.672357                | 3.121525  | 1.215665  |
| 24               | 6                | 0              | -0.493969               | 3.418765  | -1.438437 |
| 25               | 1                | 0              | -0.056518               | 0.039171  | -2.800576 |
| 26               | 1                | 0              | 1.472717                | -0.133836 | -1.771567 |
| 27               | 1                | 0              | -0.144492               | -3.290911 | -2.054313 |
| 28               | 1                | 0              | -1.512187               | -4.274595 | -1.462330 |
| 29               | 1                | 0              | -1.810327               | -2.723027 | -2.299895 |
| 30               | 1                | 0              | 0.011542                | -2.884320 | 2.055445  |
| 31               | 1                | 0              | -0.290500               | -4.363435 | 1.094510  |
| 32               | 1                | 0              | 1.054033                | -3.263619 | 0.669780  |
| 33               | 1                | 0              | -2.984094               | -3.657457 | 0.772159  |
| 34               | 1                | 0              | -2.793019               | -2.118619 | 1.679022  |
| 35               | 1                | 0              | -3.495302               | -2.097658 | 0.048695  |
| 36               | 1                | 0              | -3.023939               | 2.658044  | 0.201269  |
| 37               | 1                | 0              | -2.319604               | 2.488775  | 1.822440  |
| 38               | 1                | 0              | -2.216986               | 4.064281  | 0.967832  |
| 39               | 1                | 0              | 0.568000                | 2.652357  | 2.197919  |
| 40               | 1                | 0              | 1.667475                | 2.889134  | 0.825092  |
| 41               | 1                | 0              | 0.561999                | 4.207589  | 1.313072  |
| 42               | 1                | 0              | 0.493390                | 3.280757  | -1.889875 |
| 43               | 1                | 0              | -1.251777               | 3.061287  | -2.141437 |

|    |    |   |           |           |           |
|----|----|---|-----------|-----------|-----------|
| 44 | 1  | 0 | -0.653509 | 4.484272  | -1.238315 |
| 45 | 17 | 0 | -0.982236 | -0.006733 | 2.379909  |

-----

### TS (1-9) c

|                                              |              |
|----------------------------------------------|--------------|
| Zero-point correction=                       | 0.372664     |
| (Hartree/Particle)                           |              |
| Thermal correction to Energy=                | 0.402130     |
| Thermal correction to Enthalpy=              | 0.403074     |
| Thermal correction to Gibbs Free Energy=     | 0.311463     |
| Sum of electronic and zero-point Energies=   | -2170.777064 |
| Sum of electronic and thermal Energies=      | -2170.747598 |
| Sum of electronic and thermal Enthalpies=    | -2170.746654 |
| Sum of electronic and thermal Free Energies= | -2170.838265 |

-----

| Center<br>Number | Atomic<br>Number | Atomic<br>Type | Coordinates (Angstroms) |           |           |
|------------------|------------------|----------------|-------------------------|-----------|-----------|
|                  |                  |                | X                       | Y         | Z         |
| 1                | 6                | 0              | 2.332252                | -0.000105 | -2.114552 |
| 2                | 6                | 0              | 3.003271                | -0.000281 | -1.105546 |
| 3                | 6                | 0              | 3.830646                | -0.000050 | 0.106383  |
| 4                | 6                | 0              | 4.697471                | 1.274102  | 0.182096  |
| 5                | 6                | 0              | 4.698207                | -1.273694 | 0.182160  |
| 6                | 1                | 0              | 1.816884                | -0.000043 | -3.046957 |
| 7                | 1                | 0              | 3.137278                | -0.000178 | 0.958838  |
| 8                | 1                | 0              | 4.078274                | 2.176283  | 0.158688  |
| 9                | 1                | 0              | 5.402103                | 1.320953  | -0.656139 |
| 10               | 1                | 0              | 5.272333                | 1.277164  | 1.114795  |
| 11               | 1                | 0              | 5.403054                | -1.320020 | -0.655923 |
| 12               | 1                | 0              | 4.079633                | -2.176279 | 0.158514  |
| 13               | 1                | 0              | 5.272859                | -1.276489 | 1.114987  |
| 14               | 6                | 0              | -1.180235               | 0.000008  | -2.086965 |
| 15               | 17               | 0              | -3.065181               | 0.000017  | 0.182622  |
| 16               | 44               | 0              | -0.707943               | -0.000007 | -0.302122 |
| 17               | 15               | 0              | -0.744314               | -2.386723 | 0.060867  |
| 18               | 6                | 0              | -1.768021               | -3.351845 | -1.131653 |
| 19               | 6                | 0              | 0.902816                | -3.211276 | 0.024049  |
| 20               | 6                | 0              | -1.445318               | -2.845259 | 1.696209  |
| 21               | 15               | 0              | -0.744318               | 2.386702  | 0.060849  |
| 22               | 6                | 0              | -1.445397               | 2.845153  | 1.696187  |
| 23               | 6                | 0              | 0.902799                | 3.211296  | 0.024105  |
| 24               | 6                | 0              | -1.767975               | 3.351871  | -1.131675 |
| 25               | 17               | 0              | 0.656133                | -0.000025 | 1.913755  |
| 26               | 1                | 0              | -2.210776               | 0.000219  | -2.468322 |
| 27               | 1                | 0              | -0.419009               | -0.000198 | -2.882851 |
| 28               | 1                | 0              | -1.343763               | -3.266259 | -2.136908 |
| 29               | 1                | 0              | -1.821430               | -4.409704 | -0.850771 |
| 30               | 1                | 0              | -2.775322               | -2.925502 | -1.141638 |
| 31               | 1                | 0              | 1.521916                | -2.757877 | 0.802971  |
| 32               | 1                | 0              | 0.814862                | -4.289038 | 0.202252  |
| 33               | 1                | 0              | 1.382347                | -3.038235 | -0.943852 |
| 34               | 1                | 0              | -1.441702               | -3.932859 | 1.831345  |
| 35               | 1                | 0              | -0.849918               | -2.363774 | 2.475434  |
| 36               | 1                | 0              | -2.468360               | -2.464808 | 1.755533  |
| 37               | 1                | 0              | -2.468430               | 2.464665  | 1.755446  |
| 38               | 1                | 0              | -0.850023               | 2.363642  | 2.475424  |
| 39               | 1                | 0              | -1.441820               | 3.932747  | 1.831375  |
| 40               | 1                | 0              | 1.521869                | 2.757923  | 0.803067  |
| 41               | 1                | 0              | 1.382389                | 3.038257  | -0.943782 |
| 42               | 1                | 0              | 0.814817                | 4.289060  | 0.202280  |
| 43               | 1                | 0              | -1.343664               | 3.266339  | -2.136912 |

|    |   |   |           |          |           |
|----|---|---|-----------|----------|-----------|
| 44 | 1 | 0 | -2.775276 | 2.925529 | -1.141737 |
| 45 | 1 | 0 | -1.821399 | 4.409717 | -0.850742 |

-----

### TS (1-7) d

|                                              |              |
|----------------------------------------------|--------------|
| Zero-point correction=                       | 0.345039     |
| (Hartree/Particle)                           |              |
| Thermal correction to Energy=                | 0.373139     |
| Thermal correction to Enthalpy=              | 0.374084     |
| Thermal correction to Gibbs Free Energy=     | 0.286667     |
| Sum of electronic and zero-point Energies=   | -2131.500183 |
| Sum of electronic and thermal Energies=      | -2131.472083 |
| Sum of electronic and thermal Enthalpies=    | -2131.471139 |
| Sum of electronic and thermal Free Energies= | -2131.558555 |

-----

| Center<br>Number | Atomic<br>Number | Atomic<br>Type | Coordinates (Angstroms) |           |           |
|------------------|------------------|----------------|-------------------------|-----------|-----------|
|                  |                  |                | X                       | Y         | Z         |
| 1                | 6                | 0              | 0.885500                | 2.853223  | -0.883028 |
| 2                | 6                | 0              | 0.365364                | 3.029739  | 0.201277  |
| 3                | 6                | 0              | -0.188179               | 3.382542  | 1.507797  |
| 4                | 6                | 0              | 1.571369                | 2.873624  | -2.177588 |
| 5                | 1                | 0              | -1.188862               | 3.819262  | 1.407129  |
| 6                | 1                | 0              | -0.254582               | 2.496710  | 2.150111  |
| 7                | 1                | 0              | 0.452652                | 4.125522  | 1.998660  |
| 8                | 1                | 0              | 2.190419                | 1.983253  | -2.332560 |
| 9                | 1                | 0              | 2.225293                | 3.752090  | -2.242165 |
| 10               | 1                | 0              | 0.862559                | 2.932855  | -3.012194 |
| 11               | 6                | 0              | -0.004638               | -0.128449 | -2.129711 |
| 12               | 17               | 0              | -0.340836               | -2.596863 | -0.544355 |
| 13               | 44               | 0              | -0.052231               | -0.214644 | -0.282228 |
| 14               | 15               | 0              | 2.276346                | -0.675593 | 0.212582  |
| 15               | 6                | 0              | 3.303788                | -1.197497 | -1.231591 |
| 16               | 6                | 0              | 3.241368                | 0.697822  | 0.976019  |
| 17               | 6                | 0              | 2.500350                | -2.057402 | 1.403330  |
| 18               | 15               | 0              | -2.464899               | -0.105501 | -0.114807 |
| 19               | 6                | 0              | -3.162637               | -1.283331 | 1.110442  |
| 20               | 6                | 0              | -3.178044               | 1.520707  | 0.383083  |
| 21               | 6                | 0              | -3.376786               | -0.526948 | -1.663515 |
| 22               | 1                | 0              | -0.077830               | -1.006912 | -2.785730 |
| 23               | 1                | 0              | 0.055884                | 0.820149  | -2.682022 |
| 24               | 1                | 0              | 3.363795                | -0.385307 | -1.963117 |
| 25               | 1                | 0              | 4.317424                | -1.477950 | -0.923429 |
| 26               | 1                | 0              | 2.818985                | -2.055552 | -1.706517 |
| 27               | 1                | 0              | 2.738443                | 0.986131  | 1.903195  |
| 28               | 1                | 0              | 4.266265                | 0.378576  | 1.197120  |
| 29               | 1                | 0              | 3.264214                | 1.566161  | 0.312428  |
| 30               | 1                | 0              | 3.565194                | -2.220608 | 1.605785  |
| 31               | 1                | 0              | 1.971409                | -1.804259 | 2.325032  |
| 32               | 1                | 0              | 2.051721                | -2.961332 | 0.985400  |
| 33               | 1                | 0              | -2.864001               | -2.295097 | 0.825505  |
| 34               | 1                | 0              | -2.733319               | -1.062284 | 2.090106  |
| 35               | 1                | 0              | -4.255500               | -1.205484 | 1.141582  |
| 36               | 1                | 0              | -2.793877               | 1.775944  | 1.374129  |
| 37               | 1                | 0              | -2.869225               | 2.295998  | -0.324704 |
| 38               | 1                | 0              | -4.272535               | 1.476634  | 0.418458  |
| 39               | 1                | 0              | -3.150070               | 0.208322  | -2.441990 |
| 40               | 1                | 0              | -3.039038               | -1.510165 | -2.003686 |
| 41               | 1                | 0              | -4.459541               | -0.552847 | -1.496218 |
| 42               | 17               | 0              | -0.177056               | 0.014321  | 2.318002  |

-----  
**7a**

Zero-point correction= 0.289447  
(Hartree/Particle)  
Thermal correction to Energy= 0.313764  
Thermal correction to Enthalpy= 0.314708  
Thermal correction to Gibbs Free Energy= 0.237096  
Sum of electronic and zero-point Energies= -2052.921631  
Sum of electronic and thermal Energies= -2052.897314  
Sum of electronic and thermal Enthalpies= -2052.896370  
Sum of electronic and thermal Free Energies= -2052.973982

-----

| Center<br>Number | Atomic<br>Number | Atomic<br>Type | Coordinates (Angstroms) |           |           |
|------------------|------------------|----------------|-------------------------|-----------|-----------|
|                  |                  |                | X                       | Y         | Z         |
| 1                | 44               | 0              | -0.004480               | -0.092027 | -0.449339 |
| 2                | 15               | 0              | -2.371070               | 0.115151  | 0.099480  |
| 3                | 6                | 0              | -3.338749               | 1.177768  | -1.058414 |
| 4                | 6                | 0              | -3.348193               | -1.447013 | 0.196816  |
| 5                | 6                | 0              | -2.674899               | 0.878690  | 1.742123  |
| 6                | 17               | 0              | 0.070611                | 2.254492  | 0.404184  |
| 7                | 6                | 0              | 0.487648                | -2.131267 | -1.199938 |
| 8                | 6                | 0              | -0.681417               | -1.919488 | -1.552730 |
| 9                | 6                | 0              | 0.106978                | 0.687067  | -2.134164 |
| 10               | 1                | 0              | -3.342483               | 0.736098  | -2.059786 |
| 11               | 1                | 0              | -4.372252               | 1.298331  | -0.714589 |
| 12               | 1                | 0              | -2.856972               | 2.158279  | -1.109608 |
| 13               | 1                | 0              | -2.792661               | -2.155734 | 0.817254  |
| 14               | 1                | 0              | -4.326496               | -1.251181 | 0.648807  |
| 15               | 1                | 0              | -3.507705               | -1.881875 | -0.794039 |
| 16               | 1                | 0              | -3.753114               | 0.918952  | 1.935062  |
| 17               | 1                | 0              | -2.171624               | 0.271868  | 2.497866  |
| 18               | 1                | 0              | -2.246412               | 1.881660  | 1.756327  |
| 19               | 1                | 0              | 1.389592                | -2.685295 | -1.046388 |
| 20               | 1                | 0              | -1.639134               | -2.098881 | -1.994013 |
| 21               | 1                | 0              | 0.105980                | 0.100898  | -3.064593 |
| 22               | 1                | 0              | 0.200284                | 1.769009  | -2.287453 |
| 23               | 17               | 0              | -0.077832               | -1.395170 | 1.848346  |
| 24               | 15               | 0              | 2.382196                | 0.061219  | 0.095677  |
| 25               | 6                | 0              | 3.291214                | 1.282883  | -0.944792 |
| 26               | 6                | 0              | 2.699059                | 0.623799  | 1.815178  |
| 27               | 6                | 0              | 3.437021                | -1.451029 | -0.017428 |
| 28               | 1                | 0              | 2.762977                | 2.238035  | -0.883533 |
| 29               | 1                | 0              | 4.322082                | 1.410409  | -0.595929 |
| 30               | 1                | 0              | 3.301132                | 0.949570  | -1.987407 |
| 31               | 1                | 0              | 2.242235                | -0.091425 | 2.502476  |
| 32               | 1                | 0              | 3.779207                | 0.693208  | 1.988520  |
| 33               | 1                | 0              | 2.225773                | 1.596125  | 1.960508  |
| 34               | 1                | 0              | 4.450012                | -1.226410 | 0.333682  |
| 35               | 1                | 0              | 3.010465                | -2.234196 | 0.616787  |
| 36               | 1                | 0              | 3.500128                | -1.810744 | -1.049303 |

-----

**TS (7-8) a**

Zero-point correction= 0.287648  
(Hartree/Particle)

Thermal correction to Energy= 0.311766  
 Thermal correction to Enthalpy= 0.312711  
 Thermal correction to Gibbs Free Energy= 0.235303  
 Sum of electronic and zero-point Energies= -2052.906384  
 Sum of electronic and thermal Energies= -2052.882265  
 Sum of electronic and thermal Enthalpies= -2052.881321  
 Sum of electronic and thermal Free Energies= -2052.958728

| Center<br>Number | Atomic<br>Number | Atomic<br>Type | Coordinates (Angstroms) |           |           |
|------------------|------------------|----------------|-------------------------|-----------|-----------|
|                  |                  |                | X                       | Y         | Z         |
| 1                | 44               | 0              | 0.007595                | 0.218287  | -0.157763 |
| 2                | 15               | 0              | 2.422865                | 0.032561  | -0.044106 |
| 3                | 6                | 0              | 3.272044                | -0.110146 | -1.679566 |
| 4                | 6                | 0              | 3.359327                | 1.399093  | 0.782480  |
| 5                | 6                | 0              | 3.003514                | -1.463497 | 0.852001  |
| 6                | 17               | 0              | 0.132749                | -2.016063 | -1.129091 |
| 7                | 6                | 0              | 0.017289                | 1.946283  | 1.154167  |
| 8                | 6                | 0              | -0.063184               | 2.577585  | 0.076610  |
| 9                | 6                | 0              | 0.059901                | 1.279432  | -1.740724 |
| 10               | 1                | 0              | 3.154994                | 0.811094  | -2.259900 |
| 11               | 1                | 0              | 4.342020                | -0.311101 | -1.556303 |
| 12               | 1                | 0              | 2.807290                | -0.931537 | -2.232266 |
| 13               | 1                | 0              | 3.041059                | 1.475111  | 1.826898  |
| 14               | 1                | 0              | 4.438419                | 1.211677  | 0.755462  |
| 15               | 1                | 0              | 3.151167                | 2.354940  | 0.291730  |
| 16               | 1                | 0              | 4.098382                | -1.505782 | 0.874485  |
| 17               | 1                | 0              | 2.597122                | -1.447666 | 1.865910  |
| 18               | 1                | 0              | 2.599995                | -2.344298 | 0.347047  |
| 19               | 1                | 0              | 0.054318                | 1.864864  | 2.223709  |
| 20               | 1                | 0              | -0.188993               | 3.424170  | -0.569932 |
| 21               | 1                | 0              | 0.970112                | 1.689562  | -2.197727 |
| 22               | 1                | 0              | -0.831216               | 1.599721  | -2.295852 |
| 23               | 17               | 0              | -0.175130               | -0.918619 | 2.182116  |
| 24               | 15               | 0              | -2.412498               | 0.010636  | -0.124200 |
| 25               | 6                | 0              | -3.364950               | 0.561113  | -1.616339 |
| 26               | 6                | 0              | -3.012880               | -1.708835 | 0.123945  |
| 27               | 6                | 0              | -3.239260               | 0.938175  | 1.242073  |
| 28               | 1                | 0              | -3.018811               | 0.008612  | -2.495725 |
| 29               | 1                | 0              | -4.437755               | 0.380442  | -1.486634 |
| 30               | 1                | 0              | -3.215320               | 1.631250  | -1.797235 |
| 31               | 1                | 0              | -2.546820               | -2.101322 | 1.031051  |
| 32               | 1                | 0              | -4.104885               | -1.727449 | 0.214710  |
| 33               | 1                | 0              | -2.691525               | -2.328476 | -0.715934 |
| 34               | 1                | 0              | -4.318595               | 0.749788  | 1.255833  |
| 35               | 1                | 0              | -2.796629               | 0.605381  | 2.185411  |
| 36               | 1                | 0              | -3.064327               | 2.012822  | 1.132133  |

## 8a

Zero-point correction= 0.292445  
 (Hartree/Particle)  
 Thermal correction to Energy= 0.316455  
 Thermal correction to Enthalpy= 0.317399  
 Thermal correction to Gibbs Free Energy= 0.238803  
 Sum of electronic and zero-point Energies= -2052.969908  
 Sum of electronic and thermal Energies= -2052.945898  
 Sum of electronic and thermal Enthalpies= -2052.944954

Sum of electronic and thermal Free Energies= -2053.023550

| Center<br>Number | Atomic<br>Number | Atomic<br>Type | Coordinates (Angstroms) |           |           |
|------------------|------------------|----------------|-------------------------|-----------|-----------|
|                  |                  |                | X                       | Y         | Z         |
| 1                | 44               | 0              | 0.007227                | 0.303838  | -0.217342 |
| 2                | 15               | 0              | -2.358874               | -0.159395 | 0.066655  |
| 3                | 6                | 0              | -3.283954               | 0.824656  | 1.324000  |
| 4                | 6                | 0              | -3.354404               | 0.024399  | -1.477244 |
| 5                | 6                | 0              | -2.685851               | -1.893761 | 0.576638  |
| 6                | 6                | 0              | 0.038755                | 1.392144  | -1.715108 |
| 7                | 6                | 0              | 0.411811                | 2.464577  | -0.825558 |
| 8                | 6                | 0              | -0.348829               | 2.706764  | 0.306289  |
| 9                | 15               | 0              | 2.342586                | -0.185265 | 0.121422  |
| 10               | 6                | 0              | 3.178330                | 0.896792  | 1.355986  |
| 11               | 6                | 0              | 2.689614                | -1.892843 | 0.694256  |
| 12               | 6                | 0              | 3.366879                | -0.025360 | -1.405634 |
| 13               | 1                | 0              | -3.372709               | 1.871529  | 1.017975  |
| 14               | 1                | 0              | -4.290870               | 0.416439  | 1.465538  |
| 15               | 1                | 0              | -2.730419               | 0.773645  | 2.265573  |
| 16               | 1                | 0              | -2.880271               | -0.575147 | -2.259658 |
| 17               | 1                | 0              | -4.385768               | -0.315931 | -1.330543 |
| 18               | 1                | 0              | -3.363283               | 1.071554  | -1.795832 |
| 19               | 1                | 0              | -3.765357               | -2.060488 | 0.668057  |
| 20               | 1                | 0              | -2.258684               | -2.566465 | -0.169755 |
| 21               | 1                | 0              | -2.190326               | -2.071249 | 1.533462  |
| 22               | 1                | 0              | 0.067567                | 1.327492  | -2.804179 |
| 23               | 1                | 0              | 1.422404                | 2.881339  | -0.882421 |
| 24               | 1                | 0              | -1.426070               | 2.626391  | 0.288929  |
| 25               | 1                | 0              | 0.086070                | 3.222161  | 1.157388  |
| 26               | 1                | 0              | 2.642511                | 0.800359  | 2.304148  |
| 27               | 1                | 0              | 4.226843                | 0.607639  | 1.489970  |
| 28               | 1                | 0              | 3.136208                | 1.941590  | 1.031856  |
| 29               | 1                | 0              | 2.295995                | -2.593637 | -0.045308 |
| 30               | 1                | 0              | 3.768651                | -2.036890 | 0.820609  |
| 31               | 1                | 0              | 2.168340                | -2.051112 | 1.640493  |
| 32               | 1                | 0              | 4.405934                | -0.320159 | -1.220230 |
| 33               | 1                | 0              | 2.933542                | -0.673887 | -2.172301 |
| 34               | 1                | 0              | 3.349659                | 1.007331  | -1.768467 |
| 35               | 17               | 0              | -0.022750               | -0.492554 | 2.284285  |
| 36               | 17               | 0              | 0.023471                | -1.770135 | -1.548705 |

## 7b

Zero-point correction= 0.317099  
(Hartree/Particle)  
Thermal correction to Energy= 0.343649  
Thermal correction to Enthalpy= 0.344593  
Thermal correction to Gibbs Free Energy= 0.261789  
Sum of electronic and zero-point Energies= -2092.215574  
Sum of electronic and thermal Energies= -2092.189024  
Sum of electronic and thermal Enthalpies= -2092.188080  
Sum of electronic and thermal Free Energies= -2092.270884

| Center<br>Number | Atomic<br>Number | Atomic<br>Type | Coordinates (Angstroms) |          |           |
|------------------|------------------|----------------|-------------------------|----------|-----------|
|                  |                  |                | X                       | Y        | Z         |
| 1                | 44               | 0              | 0.037641                | 0.166376 | -0.214909 |

|    |    |   |           |           |           |
|----|----|---|-----------|-----------|-----------|
| 2  | 15 | 0 | 2.469795  | 0.055323  | 0.017861  |
| 3  | 6  | 0 | 3.375650  | 0.032866  | -1.589594 |
| 4  | 6  | 0 | 3.326105  | 1.399845  | 0.953556  |
| 5  | 6  | 0 | 3.063675  | -1.471077 | 0.848539  |
| 6  | 17 | 0 | 0.343902  | -2.065989 | -1.248035 |
| 7  | 6  | 0 | 0.172852  | 0.812826  | -1.959203 |
| 8  | 15 | 0 | -2.306921 | -0.444338 | 0.014799  |
| 9  | 6  | 0 | -3.345302 | -0.243126 | -1.502596 |
| 10 | 6  | 0 | -2.578151 | -2.207168 | 0.454960  |
| 11 | 6  | 0 | -3.242218 | 0.452901  | 1.327171  |
| 12 | 1  | 0 | 3.240525  | 0.986102  | -2.110462 |
| 13 | 1  | 0 | 4.446116  | -0.145508 | -1.437574 |
| 14 | 1  | 0 | 2.955932  | -0.768975 | -2.203397 |
| 15 | 1  | 0 | 3.007803  | 1.375831  | 2.000121  |
| 16 | 1  | 0 | 4.412000  | 1.258909  | 0.916864  |
| 17 | 1  | 0 | 3.076845  | 2.378316  | 0.532045  |
| 18 | 1  | 0 | 4.158515  | -1.470679 | 0.901944  |
| 19 | 1  | 0 | 2.627373  | -1.523339 | 1.848069  |
| 20 | 1  | 0 | 2.709934  | -2.332055 | 0.277388  |
| 21 | 1  | 0 | 0.163283  | 1.870238  | -2.258897 |
| 22 | 1  | 0 | 0.340141  | 0.132289  | -2.802858 |
| 23 | 1  | 0 | -2.897278 | -0.833174 | -2.307696 |
| 24 | 1  | 0 | -4.370697 | -0.589878 | -1.330616 |
| 25 | 1  | 0 | -3.370699 | 0.804917  | -1.816001 |
| 26 | 1  | 0 | -2.053011 | -2.411721 | 1.390241  |
| 27 | 1  | 0 | -3.650886 | -2.403597 | 0.566030  |
| 28 | 1  | 0 | -2.151998 | -2.840664 | -0.325054 |
| 29 | 1  | 0 | -4.254338 | 0.045280  | 1.427365  |
| 30 | 1  | 0 | -2.695432 | 0.322603  | 2.264872  |
| 31 | 1  | 0 | -3.308861 | 1.521588  | 1.107611  |
| 32 | 6  | 0 | 0.132114  | 2.021403  | 1.083377  |
| 33 | 6  | 0 | -0.650262 | 2.424322  | 0.219095  |
| 34 | 6  | 0 | -1.564426 | 3.245941  | -0.583337 |
| 35 | 1  | 0 | 0.690989  | 1.967695  | 1.993387  |
| 36 | 1  | 0 | -1.637450 | 4.248040  | -0.143880 |
| 37 | 1  | 0 | -1.217105 | 3.359197  | -1.615514 |
| 38 | 1  | 0 | -2.572000 | 2.817685  | -0.619038 |
| 39 | 17 | 0 | 0.015555  | -0.761470 | 2.259761  |

## TS (7-8) b

Zero-point correction= 0.317056  
(Hartree/Particle)  
Thermal correction to Energy= 0.342554  
Thermal correction to Enthalpy= 0.343498  
Thermal correction to Gibbs Free Energy= 0.262915  
Sum of electronic and zero-point Energies= -2092.198752  
Sum of electronic and thermal Energies= -2092.173253  
Sum of electronic and thermal Enthalpies= -2092.172309  
Sum of electronic and thermal Free Energies= -2092.252893

| Center<br>Number | Atomic<br>Number | Atomic<br>Type | Coordinates (Angstroms) |           |           |
|------------------|------------------|----------------|-------------------------|-----------|-----------|
|                  |                  |                | X                       | Y         | Z         |
| 1                | 44               | 0              | 0.031054                | 0.069606  | -0.114363 |
| 2                | 15               | 0              | 2.457109                | -0.012900 | -0.046155 |
| 3                | 6                | 0              | 3.266416                | 0.013622  | -1.706009 |
| 4                | 6                | 0              | 3.359114                | 1.322818  | 0.865124  |

|    |    |   |           |           |           |
|----|----|---|-----------|-----------|-----------|
| 5  | 6  | 0 | 3.111161  | -1.550020 | 0.720943  |
| 6  | 17 | 0 | 0.269107  | -2.022981 | -1.347822 |
| 7  | 6  | 0 | 0.076690  | 1.602377  | 1.347926  |
| 8  | 6  | 0 | -0.211873 | 2.388801  | 0.398118  |
| 9  | 6  | 0 | 0.052262  | 1.407979  | -1.480236 |
| 10 | 15 | 0 | -2.368147 | -0.280753 | -0.129402 |
| 11 | 6  | 0 | -3.327814 | 0.324139  | -1.595560 |
| 12 | 6  | 0 | -2.881286 | -2.042162 | -0.018750 |
| 13 | 6  | 0 | -3.253217 | 0.501187  | 1.290666  |
| 14 | 6  | 0 | -0.782700 | 3.675955  | -0.075665 |
| 15 | 1  | 0 | 3.085003  | 0.971527  | -2.204069 |
| 16 | 1  | 0 | 4.347857  | -0.142057 | -1.624498 |
| 17 | 1  | 0 | 2.823906  | -0.782107 | -2.311307 |
| 18 | 1  | 0 | 3.082083  | 1.291897  | 1.923444  |
| 19 | 1  | 0 | 4.443998  | 1.195150  | 0.780723  |
| 20 | 1  | 0 | 3.083958  | 2.305595  | 0.469558  |
| 21 | 1  | 0 | 4.207212  | -1.554804 | 0.720810  |
| 22 | 1  | 0 | 2.724551  | -1.627858 | 1.740013  |
| 23 | 1  | 0 | 2.728391  | -2.403416 | 0.156240  |
| 24 | 1  | 0 | 0.218765  | 1.460578  | 2.404153  |
| 25 | 1  | 0 | 0.941555  | 1.962383  | -1.805581 |
| 26 | 1  | 0 | -0.832820 | 1.730348  | -2.041815 |
| 27 | 1  | 0 | -2.926754 | -0.137720 | -2.503328 |
| 28 | 1  | 0 | -4.389250 | 0.067115  | -1.506261 |
| 29 | 1  | 0 | -3.243290 | 1.411736  | -1.695517 |
| 30 | 1  | 0 | -2.401459 | -2.478276 | 0.860526  |
| 31 | 1  | 0 | -3.971737 | -2.121736 | 0.058389  |
| 32 | 1  | 0 | -2.524677 | -2.578179 | -0.900968 |
| 33 | 1  | 0 | -4.326322 | 0.281365  | 1.265285  |
| 34 | 1  | 0 | -2.817390 | 0.103656  | 2.211736  |
| 35 | 1  | 0 | -3.108608 | 1.586226  | 1.278467  |
| 36 | 1  | 0 | -0.830866 | 4.362596  | 0.777815  |
| 37 | 1  | 0 | -0.181531 | 4.143893  | -0.861978 |
| 38 | 1  | 0 | -1.799999 | 3.545373  | -0.463487 |
| 39 | 17 | 0 | -0.121217 | -1.336979 | 2.080623  |

## 8b

Zero-point correction= 0.320516  
(Hartree/Particle)  
Thermal correction to Energy= 0.346354  
Thermal correction to Enthalpy= 0.347298  
Thermal correction to Gibbs Free Energy= 0.264508  
Sum of electronic and zero-point Energies= -2092.287960  
Sum of electronic and thermal Energies= -2092.262122  
Sum of electronic and thermal Enthalpies= -2092.261177  
Sum of electronic and thermal Free Energies= -2092.343968

| Center<br>Number | Atomic<br>Number | Atomic<br>Type | Coordinates (Angstroms) |           |           |
|------------------|------------------|----------------|-------------------------|-----------|-----------|
|                  |                  |                | X                       | Y         | Z         |
| 1                | 44               | 0              | 0.154675                | -0.206715 | 0.040428  |
| 2                | 15               | 0              | -2.179260               | -0.865233 | 0.102409  |
| 3                | 6                | 0              | -3.291858               | -0.290679 | 1.458273  |
| 4                | 6                | 0              | -3.162930               | -0.552304 | -1.427150 |
| 5                | 6                | 0              | -2.253829               | -2.703389 | 0.282333  |
| 6                | 17               | 0              | 0.158073                | 0.027321  | 2.455910  |
| 7                | 6                | 0              | -0.065305               | 1.498846  | -0.640938 |



|    |    |   |           |           |           |
|----|----|---|-----------|-----------|-----------|
| 8  | 6  | 0 | -1.088239 | 2.521971  | -0.410343 |
| 9  | 6  | 0 | -1.627297 | 2.725486  | 0.809055  |
| 10 | 15 | 0 | 2.550743  | -0.000488 | 0.040306  |
| 11 | 6  | 0 | 3.304847  | 1.194646  | 1.225713  |
| 12 | 6  | 0 | 3.331793  | -1.609604 | 0.493620  |
| 13 | 6  | 0 | 3.354618  | 0.425874  | -1.565261 |
| 14 | 6  | 0 | -1.421316 | 3.408674  | -1.596685 |
| 15 | 1  | 0 | -3.482850 | 0.780692  | 1.352467  |
| 16 | 1  | 0 | -4.246082 | -0.828911 | 1.434045  |
| 17 | 1  | 0 | -2.795330 | -0.457132 | 2.418035  |
| 18 | 1  | 0 | -2.608393 | -0.947702 | -2.282697 |
| 19 | 1  | 0 | -4.150823 | -1.023752 | -1.375527 |
| 20 | 1  | 0 | -3.289998 | 0.526359  | -1.562017 |
| 21 | 1  | 0 | -3.287728 | -3.066943 | 0.266958  |
| 22 | 1  | 0 | -1.690880 | -3.161983 | -0.535409 |
| 23 | 1  | 0 | -1.789616 | -2.990464 | 1.231539  |
| 24 | 1  | 0 | 0.673272  | 1.810474  | -1.396960 |
| 25 | 1  | 0 | -1.342306 | 2.108821  | 1.655476  |
| 26 | 1  | 0 | -2.322953 | 3.543148  | 0.984919  |
| 27 | 1  | 0 | 2.916277  | 0.990237  | 2.226716  |
| 28 | 1  | 0 | 4.398361  | 1.124315  | 1.225919  |
| 29 | 1  | 0 | 3.011298  | 2.212837  | 0.950540  |
| 30 | 1  | 0 | 3.014444  | -2.371884 | -0.224233 |
| 31 | 1  | 0 | 4.425516  | -1.540376 | 0.492471  |
| 32 | 1  | 0 | 2.990950  | -1.903302 | 1.491304  |
| 33 | 1  | 0 | 4.446544  | 0.377638  | -1.488833 |
| 34 | 1  | 0 | 3.002314  | -0.270344 | -2.330929 |
| 35 | 1  | 0 | 3.068179  | 1.439777  | -1.864095 |
| 36 | 1  | 0 | -0.527463 | 3.929426  | -1.963379 |
| 37 | 1  | 0 | -1.811283 | 2.819306  | -2.436079 |
| 38 | 1  | 0 | -2.169628 | 4.161915  | -1.331194 |
| 39 | 17 | 0 | 0.354123  | -1.491909 | -2.022399 |

## 7c

|                                              |              |
|----------------------------------------------|--------------|
| Zero-point correction=                       | 0.374620     |
| (Hartree/Particle)                           |              |
| Thermal correction to Energy=                | 0.403644     |
| Thermal correction to Enthalpy=              | 0.404588     |
| Thermal correction to Gibbs Free Energy=     | 0.316328     |
| Sum of electronic and zero-point Energies=   | -2170.783447 |
| Sum of electronic and thermal Energies=      | -2170.754423 |
| Sum of electronic and thermal Enthalpies=    | -2170.753479 |
| Sum of electronic and thermal Free Energies= | -2170.841739 |

| Center<br>Number | Atomic<br>Number | Atomic<br>Type | Coordinates (Angstroms) |           |           |
|------------------|------------------|----------------|-------------------------|-----------|-----------|
|                  |                  |                | X                       | Y         | Z         |
| 1                | 44               | 0              | 0.168840                | -0.154421 | -0.174926 |
| 2                | 15               | 0              | 2.449043                | 0.664639  | 0.093784  |
| 3                | 6                | 0              | 3.276466                | 1.063330  | -1.506365 |
| 4                | 6                | 0              | 2.703216                | 2.202811  | 1.086800  |
| 5                | 6                | 0              | 3.599396                | -0.541576 | 0.864052  |
| 6                | 6                | 0              | -0.037022               | 0.633762  | -1.857356 |
| 7                | 15               | 0              | -1.846118               | -1.514583 | -0.102267 |
| 8                | 6                | 0              | -2.982368               | -1.356005 | -1.553926 |
| 9                | 6                | 0              | -1.527987               | -3.321496 | -0.026271 |
| 10               | 6                | 0              | -2.951620               | -1.218363 | 1.342722  |
| 11               | 1                | 0              | 2.772188                | 1.907538  | -1.987432 |

|    |    |   |           |           |           |
|----|----|---|-----------|-----------|-----------|
| 12 | 1  | 0 | 4.333023  | 1.311696  | -1.356305 |
| 13 | 1  | 0 | 3.193224  | 0.186459  | -2.154366 |
| 14 | 1  | 0 | 2.386721  | 2.029674  | 2.119430  |
| 15 | 1  | 0 | 3.759229  | 2.495356  | 1.086184  |
| 16 | 1  | 0 | 2.102901  | 3.019756  | 0.675512  |
| 17 | 1  | 0 | 4.618201  | -0.137330 | 0.883846  |
| 18 | 1  | 0 | 3.256720  | -0.774452 | 1.874001  |
| 19 | 1  | 0 | 3.565247  | -1.462700 | 0.277634  |
| 20 | 1  | 0 | -0.558670 | 1.564255  | -2.113415 |
| 21 | 1  | 0 | 0.401242  | 0.145294  | -2.735870 |
| 22 | 1  | 0 | -2.431477 | -1.615405 | -2.463084 |
| 23 | 1  | 0 | -3.848937 | -2.020077 | -1.457370 |
| 24 | 1  | 0 | -3.334335 | -0.323492 | -1.645228 |
| 25 | 1  | 0 | -0.916926 | -3.520529 | 0.856881  |
| 26 | 1  | 0 | -2.473650 | -3.873159 | 0.027851  |
| 27 | 1  | 0 | -0.959101 | -3.622795 | -0.908132 |
| 28 | 1  | 0 | -3.803919 | -1.906593 | 1.325169  |
| 29 | 1  | 0 | -2.362444 | -1.380159 | 2.249183  |
| 30 | 1  | 0 | -3.316462 | -0.188053 | 1.342550  |
| 31 | 17 | 0 | 1.277685  | -1.985098 | -1.411816 |
| 32 | 6  | 0 | -0.508413 | 1.303307  | 1.459168  |
| 33 | 6  | 0 | -1.151429 | 1.782637  | 0.523229  |
| 34 | 6  | 0 | -2.038052 | 2.655764  | -0.275439 |
| 35 | 6  | 0 | -1.304439 | 3.945213  | -0.701668 |
| 36 | 6  | 0 | -3.312961 | 2.990270  | 0.528554  |
| 37 | 1  | 0 | -0.121635 | 1.062160  | 2.427769  |
| 38 | 1  | 0 | -2.344067 | 2.120690  | -1.184121 |
| 39 | 1  | 0 | -0.403863 | 3.722816  | -1.282343 |
| 40 | 1  | 0 | -1.005324 | 4.523353  | 0.179461  |
| 41 | 1  | 0 | -1.964421 | 4.569198  | -1.314945 |
| 42 | 1  | 0 | -3.061219 | 3.531376  | 1.446874  |
| 43 | 1  | 0 | -3.859907 | 2.084356  | 0.807265  |
| 44 | 1  | 0 | -3.977614 | 3.622028  | -0.071613 |
| 45 | 17 | 0 | 0.563122  | -1.448166 | 2.095205  |

### TS (7-8) c

|                                              |              |
|----------------------------------------------|--------------|
| Zero-point correction=                       | 0.374224     |
| (Hartree/Particle)                           |              |
| Thermal correction to Energy=                | 0.402322     |
| Thermal correction to Enthalpy=              | 0.403266     |
| Thermal correction to Gibbs Free Energy=     | 0.316934     |
| Sum of electronic and zero-point Energies=   | -2170.767275 |
| Sum of electronic and thermal Energies=      | -2170.739176 |
| Sum of electronic and thermal Enthalpies=    | -2170.738232 |
| Sum of electronic and thermal Free Energies= | -2170.824564 |

| Center<br>Number | Atomic<br>Number | Atomic<br>Type | Coordinates (Angstroms) |           |           |
|------------------|------------------|----------------|-------------------------|-----------|-----------|
|                  |                  |                | X                       | Y         | Z         |
| 1                | 44               | 0              | 0.204765                | -0.220197 | -0.126875 |
| 2                | 15               | 0              | 2.419192                | 0.773316  | 0.017266  |
| 3                | 6                | 0              | 3.222208                | 1.086807  | -1.616245 |
| 4                | 6                | 0              | 2.607332                | 2.406774  | 0.870610  |
| 5                | 6                | 0              | 3.637691                | -0.288919 | 0.892090  |
| 6                | 17               | 0              | 1.409586                | -2.022755 | -1.251097 |
| 7                | 6                | 0              | -0.465790               | 1.228923  | 1.278297  |
| 8                | 6                | 0              | -1.075560               | 1.775091  | 0.313270  |

|    |    |   |           |           |           |
|----|----|---|-----------|-----------|-----------|
| 9  | 6  | 0 | -0.287763 | 0.945155  | -1.554965 |
| 10 | 15 | 0 | -1.787746 | -1.595372 | -0.203818 |
| 11 | 6  | 0 | -2.861857 | -1.491102 | -1.711098 |
| 12 | 6  | 0 | -1.462197 | -3.399748 | -0.073731 |
| 13 | 6  | 0 | -2.983003 | -1.293409 | 1.170982  |
| 14 | 6  | 0 | -2.210587 | 2.628534  | -0.169568 |
| 15 | 6  | 0 | -1.750446 | 3.850029  | -0.987578 |
| 16 | 6  | 0 | -3.041680 | 3.071645  | 1.053160  |
| 17 | 1  | 0 | 2.676231  | 1.857869  | -2.169454 |
| 18 | 1  | 0 | 4.260628  | 1.412669  | -1.490544 |
| 19 | 1  | 0 | 3.192810  | 0.158151  | -2.192194 |
| 20 | 1  | 0 | 2.316460  | 2.307179  | 1.920898  |
| 21 | 1  | 0 | 3.644511  | 2.757093  | 0.823998  |
| 22 | 1  | 0 | 1.957322  | 3.155198  | 0.406315  |
| 23 | 1  | 0 | 4.621908  | 0.191855  | 0.930679  |
| 24 | 1  | 0 | 3.268738  | -0.494157 | 1.899919  |
| 25 | 1  | 0 | 3.702279  | -1.242598 | 0.362987  |
| 26 | 1  | 0 | -0.282223 | 1.174994  | 2.335959  |
| 27 | 1  | 0 | 0.296327  | 1.813590  | -1.881216 |
| 28 | 1  | 0 | -1.200550 | 0.841074  | -2.154229 |
| 29 | 1  | 0 | -2.264712 | -1.733920 | -2.595706 |
| 30 | 1  | 0 | -3.701666 | -2.191891 | -1.647141 |
| 31 | 1  | 0 | -3.264576 | -0.479690 | -1.832500 |
| 32 | 1  | 0 | -0.880464 | -3.572382 | 0.834820  |
| 33 | 1  | 0 | -2.403918 | -3.959698 | -0.040227 |
| 34 | 1  | 0 | -0.860762 | -3.720459 | -0.926904 |
| 35 | 1  | 0 | -3.815148 | -2.005473 | 1.138703  |
| 36 | 1  | 0 | -2.437558 | -1.404715 | 2.112230  |
| 37 | 1  | 0 | -3.380517 | -0.275465 | 1.113970  |
| 38 | 1  | 0 | -2.852504 | 2.009484  | -0.810874 |
| 39 | 1  | 0 | -1.207674 | 3.556981  | -1.890361 |
| 40 | 1  | 0 | -1.096365 | 4.491915  | -0.386809 |
| 41 | 1  | 0 | -2.620233 | 4.442079  | -1.292951 |
| 42 | 1  | 0 | -2.437795 | 3.685077  | 1.730601  |
| 43 | 1  | 0 | -3.414764 | 2.210136  | 1.614961  |
| 44 | 1  | 0 | -3.898229 | 3.670579  | 0.724129  |
| 45 | 17 | 0 | 0.568708  | -1.492224 | 2.130530  |

## 8c

Zero-point correction= 0.378238  
(Hartree/Particle)  
Thermal correction to Energy= 0.406415  
Thermal correction to Enthalpy= 0.407359  
Thermal correction to Gibbs Free Energy= 0.319659  
Sum of electronic and zero-point Energies= -2170.854654  
Sum of electronic and thermal Energies= -2170.826478  
Sum of electronic and thermal Enthalpies= -2170.825534  
Sum of electronic and thermal Free Energies= -2170.913233

| Center<br>Number | Atomic<br>Number | Atomic<br>Type | Coordinates (Angstroms) |          |           |
|------------------|------------------|----------------|-------------------------|----------|-----------|
|                  |                  |                | X                       | Y        | Z         |
| 1                | 44               | 0              | -0.518544               | 0.307301 | 0.012094  |
| 2                | 15               | 0              | 1.141102                | 2.078139 | -0.019864 |
| 3                | 6                | 0              | 2.208250                | 2.408715 | 1.449487  |
| 4                | 6                | 0              | 2.327840                | 2.118974 | -1.431201 |
| 5                | 6                | 0              | 0.216501                | 3.667823 | -0.210118 |

|    |    |   |           |           |           |
|----|----|---|-----------|-----------|-----------|
| 6  | 6  | 0 | 0.581690  | -1.177401 | -0.126293 |
| 7  | 6  | 0 | 1.873212  | -1.527726 | 0.473695  |
| 8  | 6  | 0 | 2.214468  | -1.078676 | 1.699995  |
| 9  | 15 | 0 | -2.500529 | -1.050273 | -0.013557 |
| 10 | 6  | 0 | -2.811479 | -2.145065 | 1.437664  |
| 11 | 6  | 0 | -3.996876 | 0.028313  | -0.068826 |
| 12 | 6  | 0 | -2.730885 | -2.175130 | -1.457715 |
| 13 | 6  | 0 | 2.725877  | -2.510057 | -0.338340 |
| 14 | 6  | 0 | 3.906663  | -3.110502 | 0.434129  |
| 15 | 6  | 0 | 3.208749  | -1.857437 | -1.649931 |
| 16 | 1  | 0 | 2.939136  | 1.603383  | 1.564535  |
| 17 | 1  | 0 | 2.739076  | 3.361154  | 1.340153  |
| 18 | 1  | 0 | 1.579822  | 2.434635  | 2.343801  |
| 19 | 1  | 0 | 1.763065  | 2.019758  | -2.362100 |
| 20 | 1  | 0 | 2.903908  | 3.051139  | -1.442564 |
| 21 | 1  | 0 | 3.016787  | 1.272867  | -1.353869 |
| 22 | 1  | 0 | 0.898376  | 4.523488  | -0.274743 |
| 23 | 1  | 0 | -0.391069 | 3.616407  | -1.118407 |
| 24 | 1  | 0 | -0.446955 | 3.802907  | 0.650092  |
| 25 | 1  | 0 | 0.218948  | -1.959778 | -0.812261 |
| 26 | 1  | 0 | 1.549505  | -0.421154 | 2.249916  |
| 27 | 1  | 0 | 3.127168  | -1.397654 | 2.193966  |
| 28 | 1  | 0 | -2.722638 | -1.550686 | 2.350667  |
| 29 | 1  | 0 | -3.803428 | -2.607731 | 1.385680  |
| 30 | 1  | 0 | -2.050358 | -2.931322 | 1.469860  |
| 31 | 1  | 0 | -3.941362 | 0.663854  | -0.957693 |
| 32 | 1  | 0 | -4.918847 | -0.563408 | -0.100076 |
| 33 | 1  | 0 | -4.008955 | 0.667191  | 0.819751  |
| 34 | 1  | 0 | -3.716531 | -2.653023 | -1.436105 |
| 35 | 1  | 0 | -2.616514 | -1.594195 | -2.376568 |
| 36 | 1  | 0 | -1.961682 | -2.954580 | -1.445738 |
| 37 | 1  | 0 | 2.058867  | -3.340270 | -0.618350 |
| 38 | 1  | 0 | 3.579065  | -3.615003 | 1.349577  |
| 39 | 1  | 0 | 4.637301  | -2.341009 | 0.711839  |
| 40 | 1  | 0 | 4.427108  | -3.845776 | -0.189659 |
| 41 | 1  | 0 | 3.909758  | -1.040635 | -1.437070 |
| 42 | 1  | 0 | 2.376420  | -1.443428 | -2.229321 |
| 43 | 1  | 0 | 3.728849  | -2.590193 | -2.277951 |
| 44 | 17 | 0 | -0.842363 | 0.692391  | 2.389825  |
| 45 | 17 | 0 | -0.923021 | 0.780719  | -2.348851 |

## 7d

Zero-point correction= 0.345890  
(Hartree/Particle)  
Thermal correction to Energy= 0.374229  
Thermal correction to Enthalpy= 0.375173  
Thermal correction to Gibbs Free Energy= 0.286913  
Sum of electronic and zero-point Energies= -2131.505016  
Sum of electronic and thermal Energies= -2131.476678  
Sum of electronic and thermal Enthalpies= -2131.475733  
Sum of electronic and thermal Free Energies= -2131.563994

| Center<br>Number | Atomic<br>Number | Atomic<br>Type | Coordinates (Angstroms) |           |           |
|------------------|------------------|----------------|-------------------------|-----------|-----------|
|                  |                  |                | X                       | Y         | Z         |
| 1                | 44               | 0              | 0.011247                | -0.039579 | -0.267237 |
| 2                | 15               | 0              | 2.447549                | -0.171377 | -0.118614 |

|    |    |   |           |           |           |
|----|----|---|-----------|-----------|-----------|
| 3  | 6  | 0 | 3.211540  | -1.142656 | -1.488345 |
| 4  | 6  | 0 | 3.444443  | 1.388781  | -0.172420 |
| 5  | 6  | 0 | 3.050681  | -1.030470 | 1.388266  |
| 6  | 17 | 0 | 0.169554  | -2.511655 | -0.425100 |
| 7  | 6  | 0 | 0.136521  | 2.200034  | 0.451443  |
| 8  | 6  | 0 | -0.384648 | 2.219816  | -0.671751 |
| 9  | 6  | 0 | 0.097612  | -0.080538 | -2.137480 |
| 10 | 15 | 0 | -2.386215 | -0.338025 | 0.035089  |
| 11 | 6  | 0 | -3.367576 | -0.512910 | -1.524467 |
| 12 | 6  | 0 | -2.876945 | -1.840586 | 0.970913  |
| 13 | 6  | 0 | -3.240091 | 1.027076  | 0.933175  |
| 14 | 6  | 0 | -0.996501 | 2.838926  | -1.863208 |
| 15 | 6  | 0 | 0.617729  | 2.706519  | 1.747442  |
| 16 | 1  | 0 | 3.092142  | -0.604358 | -2.434350 |
| 17 | 1  | 0 | 4.278521  | -1.308462 | -1.301880 |
| 18 | 1  | 0 | 2.692402  | -2.101503 | -1.559800 |
| 19 | 1  | 0 | 3.236062  | 2.012621  | 0.699994  |
| 20 | 1  | 0 | 4.515357  | 1.156996  | -0.189337 |
| 21 | 1  | 0 | 3.188987  | 1.959888  | -1.070247 |
| 22 | 1  | 0 | 4.143215  | -1.117372 | 1.373518  |
| 23 | 1  | 0 | 2.718628  | -0.491651 | 2.277883  |
| 24 | 1  | 0 | 2.590296  | -2.021390 | 1.414788  |
| 25 | 1  | 0 | 0.057747  | 0.757943  | -2.843026 |
| 26 | 1  | 0 | 0.216844  | -1.047175 | -2.641363 |
| 27 | 1  | 0 | -2.985692 | -1.375760 | -2.078533 |
| 28 | 1  | 0 | -4.431481 | -0.666842 | -1.311074 |
| 29 | 1  | 0 | -3.256574 | 0.376659  | -2.151871 |
| 30 | 1  | 0 | -2.409370 | -1.802234 | 1.956609  |
| 31 | 1  | 0 | -3.968406 | -1.887358 | 1.061864  |
| 32 | 1  | 0 | -2.499087 | -2.722168 | 0.449004  |
| 33 | 1  | 0 | -4.306457 | 0.807393  | 1.056514  |
| 34 | 1  | 0 | -2.769222 | 1.125524  | 1.914747  |
| 35 | 1  | 0 | -3.125072 | 1.970597  | 0.392590  |
| 36 | 1  | 0 | -1.298552 | 3.866305  | -1.627147 |
| 37 | 1  | 0 | -0.295766 | 2.889851  | -2.704524 |
| 38 | 1  | 0 | -1.881508 | 2.292453  | -2.206331 |
| 39 | 1  | 0 | 1.530016  | 2.206881  | 2.079090  |
| 40 | 1  | 0 | -0.127060 | 2.526686  | 2.526356  |
| 41 | 1  | 0 | 0.806786  | 3.785061  | 1.663191  |
| 42 | 17 | 0 | -0.127449 | -0.303052 | 2.334701  |

### ET (7-8) d

Zero-point correction= 0.345834  
(Hartree/Particle)  
Thermal correction to Energy= 0.372960  
Thermal correction to Enthalpy= 0.373904  
Thermal correction to Gibbs Free Energy= 0.290042  
Sum of electronic and zero-point Energies= -2131.492133  
Sum of electronic and thermal Energies= -2131.465007  
Sum of electronic and thermal Enthalpies= -2131.464063  
Sum of electronic and thermal Free Energies= -2131.547924

| Center<br>Number | Atomic<br>Number | Atomic<br>Type | Coordinates (Angstroms) |           |           |
|------------------|------------------|----------------|-------------------------|-----------|-----------|
|                  |                  |                | X                       | Y         | Z         |
| 1                | 44               | 0              | 0.016237                | -0.046197 | -0.197574 |
| 2                | 15               | 0              | 2.437092                | -0.157503 | -0.121120 |
| 3                | 6                | 0              | 3.236841                | -0.599308 | -1.728296 |

|    |    |   |           |           |           |
|----|----|---|-----------|-----------|-----------|
| 4  | 6  | 0 | 3.386281  | 1.355670  | 0.373360  |
| 5  | 6  | 0 | 3.084918  | -1.445840 | 1.019771  |
| 6  | 17 | 0 | 0.201503  | -2.391543 | -0.918649 |
| 7  | 6  | 0 | 0.016804  | 1.889795  | 0.819291  |
| 8  | 6  | 0 | -0.156409 | 2.329999  | -0.351960 |
| 9  | 6  | 0 | 0.046360  | 0.772615  | -1.911836 |
| 10 | 15 | 0 | -2.391381 | -0.324026 | -0.130871 |
| 11 | 6  | 0 | -3.353846 | 0.045711  | -1.672709 |
| 12 | 6  | 0 | -2.950502 | -2.023276 | 0.290855  |
| 13 | 6  | 0 | -3.252398 | 0.713386  | 1.131816  |
| 14 | 6  | 0 | -0.501574 | 3.431265  | -1.284240 |
| 15 | 6  | 0 | 0.135364  | 2.236124  | 2.253108  |
| 16 | 1  | 0 | 3.078364  | 0.190837  | -2.469585 |
| 17 | 1  | 0 | 4.314802  | -0.750181 | -1.603263 |
| 18 | 1  | 0 | 2.775530  | -1.519755 | -2.096034 |
| 19 | 1  | 0 | 3.122645  | 1.641787  | 1.395767  |
| 20 | 1  | 0 | 4.466358  | 1.177097  | 0.326114  |
| 21 | 1  | 0 | 3.135405  | 2.189896  | -0.289556 |
| 22 | 1  | 0 | 4.180590  | -1.471985 | 1.000503  |
| 23 | 1  | 0 | 2.721783  | -1.246747 | 2.030517  |
| 24 | 1  | 0 | 2.677505  | -2.410769 | 0.708057  |
| 25 | 1  | 0 | 0.945053  | 1.143738  | -2.421309 |
| 26 | 1  | 0 | -0.844459 | 0.941358  | -2.529333 |
| 27 | 1  | 0 | -2.989753 | -0.586329 | -2.489087 |
| 28 | 1  | 0 | -4.422213 | -0.148114 | -1.526834 |
| 29 | 1  | 0 | -3.229661 | 1.094409  | -1.964434 |
| 30 | 1  | 0 | -2.481192 | -2.305636 | 1.236348  |
| 31 | 1  | 0 | -4.042512 | -2.062319 | 0.376957  |
| 32 | 1  | 0 | -2.604267 | -2.718337 | -0.476941 |
| 33 | 1  | 0 | -4.328425 | 0.507364  | 1.154601  |
| 34 | 1  | 0 | -2.814691 | 0.479001  | 2.106185  |
| 35 | 1  | 0 | -3.094724 | 1.775775  | 0.921269  |
| 36 | 1  | 0 | -0.533367 | 4.363017  | -0.705400 |
| 37 | 1  | 0 | 0.230279  | 3.557072  | -2.089622 |
| 38 | 1  | 0 | -1.485737 | 3.288651  | -1.745810 |
| 39 | 1  | 0 | 1.039838  | 1.799903  | 2.685521  |
| 40 | 1  | 0 | -0.698243 | 1.809016  | 2.815814  |
| 41 | 1  | 0 | 0.153709  | 3.325562  | 2.384316  |
| 42 | 17 | 0 | -0.132311 | -0.964077 | 2.218851  |

## 8d

Zero-point correction= 0.349218  
(Hartree/Particle)  
Thermal correction to Energy= 0.376226  
Thermal correction to Enthalpy= 0.377170  
Thermal correction to Gibbs Free Energy= 0.293630  
Sum of electronic and zero-point Energies= -2131.556469  
Sum of electronic and thermal Energies= -2131.529462  
Sum of electronic and thermal Enthalpies= -2131.528518  
Sum of electronic and thermal Free Energies= -2131.612058

| Center<br>Number | Atomic<br>Number | Atomic<br>Type | Coordinates (Angstroms) |           |           |
|------------------|------------------|----------------|-------------------------|-----------|-----------|
|                  |                  |                | X                       | Y         | Z         |
| 1                | 44               | 0              | 0.026885                | 0.140822  | -0.072507 |
| 2                | 15               | 0              | 2.431135                | -0.202620 | -0.057100 |
| 3                | 6                | 0              | 3.321262                | -0.196802 | -1.675161 |

|    |    |   |           |           |           |
|----|----|---|-----------|-----------|-----------|
| 4  | 6  | 0 | 3.382290  | 1.003321  | 0.968973  |
| 5  | 6  | 0 | 2.913414  | -1.824988 | 0.659553  |
| 6  | 17 | 0 | 0.206903  | -2.075870 | -1.469019 |
| 7  | 6  | 0 | -0.023337 | 1.959263  | 0.364942  |
| 8  | 6  | 0 | -0.501764 | 2.149258  | -0.986344 |
| 9  | 6  | 0 | 0.228794  | 1.516637  | -1.999081 |
| 10 | 15 | 0 | -2.235363 | -0.700671 | 0.126932  |
| 11 | 6  | 0 | -3.211335 | -0.769005 | -1.435677 |
| 12 | 6  | 0 | -2.328431 | -2.417746 | 0.773404  |
| 13 | 6  | 0 | -3.308323 | 0.229477  | 1.308738  |
| 14 | 6  | 0 | -1.849918 | 2.784328  | -1.265464 |
| 15 | 6  | 0 | 0.065000  | 2.896792  | 1.511510  |
| 16 | 1  | 0 | 3.338288  | 0.804289  | -2.116950 |
| 17 | 1  | 0 | 4.354801  | -0.534475 | -1.540334 |
| 18 | 1  | 0 | 2.797756  | -0.878128 | -2.351362 |
| 19 | 1  | 0 | 2.952608  | 1.007923  | 1.974700  |
| 20 | 1  | 0 | 4.441685  | 0.729238  | 1.027637  |
| 21 | 1  | 0 | 3.297059  | 2.009213  | 0.545088  |
| 22 | 1  | 0 | 4.004642  | -1.928410 | 0.647343  |
| 23 | 1  | 0 | 2.536247  | -1.886169 | 1.682085  |
| 24 | 1  | 0 | 2.448294  | -2.614703 | 0.065916  |
| 25 | 1  | 0 | 1.307464  | 1.548036  | -2.024323 |
| 26 | 1  | 0 | -0.255523 | 1.299475  | -2.948339 |
| 27 | 1  | 0 | -2.639135 | -1.355605 | -2.159775 |
| 28 | 1  | 0 | -4.188440 | -1.236862 | -1.270724 |
| 29 | 1  | 0 | -3.361017 | 0.237916  | -1.835680 |
| 30 | 1  | 0 | -1.835867 | -2.447692 | 1.747714  |
| 31 | 1  | 0 | -3.376082 | -2.727177 | 0.864904  |
| 32 | 1  | 0 | -1.792313 | -3.076829 | 0.088086  |
| 33 | 1  | 0 | -4.274818 | -0.270177 | 1.439739  |
| 34 | 1  | 0 | -2.786671 | 0.273155  | 2.268930  |
| 35 | 1  | 0 | -3.483735 | 1.249817  | 0.956060  |
| 36 | 1  | 0 | -2.533069 | 2.725109  | -0.413578 |
| 37 | 1  | 0 | -1.700562 | 3.847454  | -1.496558 |
| 38 | 1  | 0 | -2.327365 | 2.327539  | -2.138328 |
| 39 | 1  | 0 | 0.169826  | 2.354403  | 2.453755  |
| 40 | 1  | 0 | -0.824612 | 3.542664  | 1.553877  |
| 41 | 1  | 0 | 0.927466  | 3.567964  | 1.384541  |
| 42 | 17 | 0 | 0.178840  | -0.582835 | 2.315257  |

## 9b

Zero-point correction= 0.317651  
(Hartree/Particle)  
Thermal correction to Energy= 0.343890  
Thermal correction to Enthalpy= 0.344835  
Thermal correction to Gibbs Free Energy= 0.263114  
Sum of electronic and zero-point Energies= -2092.214734  
Sum of electronic and thermal Energies= -2092.188494  
Sum of electronic and thermal Enthalpies= -2092.187550  
Sum of electronic and thermal Free Energies= -2092.269271

| Center Number | Atomic Number | Atomic Type | Coordinates (Angstroms) |           |           |
|---------------|---------------|-------------|-------------------------|-----------|-----------|
|               |               |             | X                       | Y         | Z         |
| 1             | 44            | 0           | -0.023611               | -0.089762 | -0.356357 |
| 2             | 15            | 0           | 2.392744                | -0.237643 | -0.020387 |
| 3             | 6             | 0           | 3.172365                | -1.624138 | -0.955692 |

|    |    |   |           |           |           |
|----|----|---|-----------|-----------|-----------|
| 4  | 6  | 0 | 3.480696  | 1.190043  | -0.472924 |
| 5  | 6  | 0 | 2.872240  | -0.590659 | 1.717253  |
| 6  | 6  | 0 | 0.095869  | -0.890195 | -2.042200 |
| 7  | 15 | 0 | -2.434098 | -0.138616 | -0.027006 |
| 8  | 6  | 0 | -3.406761 | -0.872976 | -1.417920 |
| 9  | 6  | 0 | -2.992493 | -1.114289 | 1.424999  |
| 10 | 6  | 0 | -3.225096 | 1.506946  | 0.226191  |
| 11 | 1  | 0 | 3.119549  | -1.424840 | -2.030790 |
| 12 | 1  | 0 | 4.221148  | -1.750912 | -0.664466 |
| 13 | 1  | 0 | 2.616075  | -2.538719 | -0.735920 |
| 14 | 1  | 0 | 3.291901  | 2.026752  | 0.204207  |
| 15 | 1  | 0 | 4.536279  | 0.907246  | -0.390989 |
| 16 | 1  | 0 | 3.275941  | 1.513709  | -1.497953 |
| 17 | 1  | 0 | 3.958742  | -0.712109 | 1.796608  |
| 18 | 1  | 0 | 2.526319  | 0.220675  | 2.360662  |
| 19 | 1  | 0 | 2.362899  | -1.505332 | 2.029749  |
| 20 | 1  | 0 | 0.046707  | -0.392548 | -3.022347 |
| 21 | 1  | 0 | 0.238937  | -1.973903 | -2.127706 |
| 22 | 1  | 0 | -3.069593 | -1.901513 | -1.577689 |
| 23 | 1  | 0 | -4.480113 | -0.877579 | -1.196703 |
| 24 | 1  | 0 | -3.236091 | -0.305505 | -2.338354 |
| 25 | 1  | 0 | -2.525000 | -0.697123 | 2.319553  |
| 26 | 1  | 0 | -4.084614 | -1.075997 | 1.509302  |
| 27 | 1  | 0 | -2.654245 | -2.146302 | 1.312798  |
| 28 | 1  | 0 | -4.293693 | 1.395693  | 0.441281  |
| 29 | 1  | 0 | -2.726610 | 1.992026  | 1.069525  |
| 30 | 1  | 0 | -3.098070 | 2.130758  | -0.662756 |
| 31 | 17 | 0 | 0.027795  | -2.404927 | 0.517032  |
| 32 | 6  | 0 | 0.153327  | 2.372898  | -0.777227 |
| 33 | 6  | 0 | -0.405029 | 1.716629  | -1.660064 |
| 34 | 6  | 0 | 0.705333  | 3.387147  | 0.120244  |
| 35 | 1  | 0 | -0.894313 | 1.585284  | -2.605274 |
| 36 | 1  | 0 | 0.129257  | 4.314738  | 0.010852  |
| 37 | 1  | 0 | 0.632458  | 3.049303  | 1.159242  |
| 38 | 1  | 0 | 1.750596  | 3.609243  | -0.121051 |
| 39 | 17 | 0 | -0.185911 | 0.855629  | 2.081374  |

## TS (9-10)b

|                                              |              |
|----------------------------------------------|--------------|
| Zero-point correction=                       | 0.316129     |
| (Hartree/Particle)                           |              |
| Thermal correction to Energy=                | 0.342245     |
| Thermal correction to Enthalpy=              | 0.343189     |
| Thermal correction to Gibbs Free Energy=     | 0.261351     |
| Sum of electronic and zero-point Energies=   | -2092.201113 |
| Sum of electronic and thermal Energies=      | -2092.174997 |
| Sum of electronic and thermal Enthalpies=    | -2092.174053 |
| Sum of electronic and thermal Free Energies= | -2092.255891 |

| Center<br>Number | Atomic<br>Number | Atomic<br>Type | Coordinates (Angstroms) |           |           |
|------------------|------------------|----------------|-------------------------|-----------|-----------|
|                  |                  |                | X                       | Y         | Z         |
| 1                | 44               | 0              | -0.001312               | -0.072957 | -0.274457 |
| 2                | 15               | 0              | 2.412143                | -0.181798 | -0.084156 |
| 3                | 6                | 0              | 3.210950                | -1.472195 | -1.140205 |
| 4                | 6                | 0              | 3.415583                | 1.323253  | -0.489421 |
| 5                | 6                | 0              | 2.997637                | -0.627132 | 1.600945  |
| 6                | 17               | 0              | 0.075525                | -2.404193 | 0.505361  |
| 7                | 6                | 0              | 0.068367                | 2.237320  | -0.578018 |



|    |    |   |           |           |           |
|----|----|---|-----------|-----------|-----------|
| 8  | 6  | 0 | -0.096549 | 1.824535  | -1.737993 |
| 9  | 6  | 0 | 0.047095  | -0.534236 | -2.105284 |
| 10 | 15 | 0 | -2.417123 | -0.184348 | -0.119056 |
| 11 | 6  | 0 | -3.351777 | -0.819929 | -1.588490 |
| 12 | 6  | 0 | -3.045730 | -1.252512 | 1.239254  |
| 13 | 6  | 0 | -3.258714 | 1.427061  | 0.215007  |
| 14 | 6  | 0 | 0.227705  | 3.260446  | 0.468355  |
| 15 | 1  | 0 | 3.106008  | -1.225308 | -2.201861 |
| 16 | 1  | 0 | 4.277547  | -1.566972 | -0.908120 |
| 17 | 1  | 0 | 2.707251  | -2.424255 | -0.950991 |
| 18 | 1  | 0 | 3.166781  | 2.131929  | 0.204222  |
| 19 | 1  | 0 | 4.488489  | 1.114546  | -0.411310 |
| 20 | 1  | 0 | 3.191655  | 1.663957  | -1.505213 |
| 21 | 1  | 0 | 4.091314  | -0.691761 | 1.632775  |
| 22 | 1  | 0 | 2.634259  | 0.115630  | 2.314673  |
| 23 | 1  | 0 | 2.553146  | -1.588347 | 1.870682  |
| 24 | 1  | 0 | -0.266689 | 1.844609  | -2.794549 |
| 25 | 1  | 0 | 0.950053  | -0.559264 | -2.731261 |
| 26 | 1  | 0 | -0.842161 | -0.777316 | -2.702829 |
| 27 | 1  | 0 | -3.006574 | -1.830907 | -1.827788 |
| 28 | 1  | 0 | -4.427502 | -0.855469 | -1.384687 |
| 29 | 1  | 0 | -3.185753 | -0.179756 | -2.461887 |
| 30 | 1  | 0 | -2.602288 | -0.905257 | 2.175524  |
| 31 | 1  | 0 | -4.139484 | -1.207855 | 1.293553  |
| 32 | 1  | 0 | -2.715711 | -2.279878 | 1.071616  |
| 33 | 1  | 0 | -4.345243 | 1.302780  | 0.284381  |
| 34 | 1  | 0 | -2.878775 | 1.815916  | 1.164032  |
| 35 | 1  | 0 | -3.029692 | 2.146371  | -0.577254 |
| 36 | 1  | 0 | 0.376608  | 4.243263  | 0.004865  |
| 37 | 1  | 0 | -0.656832 | 3.284540  | 1.109072  |
| 38 | 1  | 0 | 1.067481  | 3.023771  | 1.125344  |
| 39 | 17 | 0 | -0.173692 | 0.634056  | 2.202075  |

## 10b

|                                              |              |
|----------------------------------------------|--------------|
| Zero-point correction=                       | 0.321282     |
| (Hartree/Particle)                           |              |
| Thermal correction to Energy=                | 0.346594     |
| Thermal correction to Enthalpy=              | 0.347538     |
| Thermal correction to Gibbs Free Energy=     | 0.267507     |
| Sum of electronic and zero-point Energies=   | -2092.268924 |
| Sum of electronic and thermal Energies=      | -2092.243612 |
| Sum of electronic and thermal Enthalpies=    | -2092.242668 |
| Sum of electronic and thermal Free Energies= | -2092.322699 |

| Center<br>Number | Atomic<br>Number | Atomic<br>Type | Coordinates (Angstroms) |           |           |
|------------------|------------------|----------------|-------------------------|-----------|-----------|
|                  |                  |                | X                       | Y         | Z         |
| 1                | 44               | 0              | -0.012076               | 0.169175  | -0.199543 |
| 2                | 15               | 0              | 2.363678                | -0.273729 | 0.083915  |
| 3                | 6                | 0              | 3.298186                | -0.949619 | -1.357192 |
| 4                | 6                | 0              | 3.363471                | 1.185468  | 0.616697  |
| 5                | 6                | 0              | 2.696746                | -1.509189 | 1.402871  |
| 6                | 17               | 0              | -0.008438               | -2.428178 | -0.511024 |
| 7                | 6                | 0              | 0.009839                | 2.007977  | -0.529500 |
| 8                | 6                | 0              | -0.421297               | 1.587097  | -1.843986 |
| 9                | 6                | 0              | 0.306817                | 0.599184  | -2.510349 |
| 10               | 15               | 0              | -2.356073               | -0.296908 | 0.098710  |

|    |    |   |           |           |           |
|----|----|---|-----------|-----------|-----------|
| 11 | 6  | 0 | -3.212366 | -0.923501 | -1.407522 |
| 12 | 6  | 0 | -2.726930 | -1.547423 | 1.388676  |
| 13 | 6  | 0 | -3.354759 | 1.166101  | 0.621687  |
| 14 | 6  | 0 | 0.095920  | 3.338321  | 0.115009  |
| 15 | 1  | 0 | 3.392091  | -0.203137 | -2.151921 |
| 16 | 1  | 0 | 4.303078  | -1.260860 | -1.051276 |
| 17 | 1  | 0 | 2.748313  | -1.813232 | -1.741597 |
| 18 | 1  | 0 | 2.898494  | 1.607167  | 1.512440  |
| 19 | 1  | 0 | 4.397201  | 0.901325  | 0.843828  |
| 20 | 1  | 0 | 3.367533  | 1.947836  | -0.169000 |
| 21 | 1  | 0 | 3.777143  | -1.650994 | 1.521245  |
| 22 | 1  | 0 | 2.253624  | -1.154510 | 2.335577  |
| 23 | 1  | 0 | 2.215639  | -2.448930 | 1.123715  |
| 24 | 1  | 0 | -1.442723 | 1.811335  | -2.167630 |
| 25 | 1  | 0 | 1.387220  | 0.614295  | -2.535155 |
| 26 | 1  | 0 | -0.177413 | 0.001568  | -3.277163 |
| 27 | 1  | 0 | -2.684253 | -1.820464 | -1.742560 |
| 28 | 1  | 0 | -4.260054 | -1.166498 | -1.197509 |
| 29 | 1  | 0 | -3.174970 | -0.173763 | -2.204536 |
| 30 | 1  | 0 | -2.306163 | -1.202288 | 2.335737  |
| 31 | 1  | 0 | -3.809836 | -1.689208 | 1.479502  |
| 32 | 1  | 0 | -2.239074 | -2.483773 | 1.110321  |
| 33 | 1  | 0 | -4.400928 | 0.892567  | 0.799303  |
| 34 | 1  | 0 | -2.919355 | 1.560043  | 1.544508  |
| 35 | 1  | 0 | -3.319293 | 1.947023  | -0.145039 |
| 36 | 1  | 0 | 0.956759  | 3.895010  | -0.283867 |
| 37 | 1  | 0 | -0.794957 | 3.938987  | -0.123072 |
| 38 | 1  | 0 | 0.196978  | 3.243831  | 1.198550  |
| 39 | 17 | 0 | -0.008124 | 0.433827  | 2.278541  |

### 9c

|                                              |              |
|----------------------------------------------|--------------|
| Zero-point correction=                       | 0.375008     |
| (Hartree/Particle)                           |              |
| Thermal correction to Energy=                | 0.403791     |
| Thermal correction to Enthalpy=              | 0.404735     |
| Thermal correction to Gibbs Free Energy=     | 0.318005     |
| Sum of electronic and zero-point Energies=   | -2170.782636 |
| Sum of electronic and thermal Energies=      | -2170.753853 |
| Sum of electronic and thermal Enthalpies=    | -2170.752909 |
| Sum of electronic and thermal Free Energies= | -2170.839639 |

| Center<br>Number | Atomic<br>Number | Atomic<br>Type | Coordinates (Angstroms) |           |           |
|------------------|------------------|----------------|-------------------------|-----------|-----------|
|                  |                  |                | X                       | Y         | Z         |
| 1                | 44               | 0              | -0.187299               | -0.363804 | -0.351867 |
| 2                | 15               | 0              | 2.041926                | -1.290594 | 0.050228  |
| 3                | 6                | 0              | 2.333068                | -2.881813 | -0.837952 |
| 4                | 6                | 0              | 3.554957                | -0.331720 | -0.412773 |
| 5                | 6                | 0              | 2.341103                | -1.731750 | 1.808297  |
| 6                | 17               | 0              | -0.894265               | -2.575905 | 0.513040  |
| 7                | 6                | 0              | -0.247844               | -1.169360 | -2.038721 |
| 8                | 15               | 0              | -2.514343               | 0.301868  | -0.099467 |
| 9                | 6                | 0              | -3.611717               | -0.188147 | -1.504908 |
| 10               | 6                | 0              | -3.368286               | -0.415214 | 1.359494  |
| 11               | 6                | 0              | -2.830242               | 2.110154  | 0.073881  |
| 12               | 1                | 0              | 2.370063                | -2.702032 | -1.917330 |
| 13               | 1                | 0              | 3.275747                | -3.339669 | -0.517782 |
| 14               | 1                | 0              | 1.501673                | -3.556035 | -0.618632 |

|    |    |   |           |           |           |
|----|----|---|-----------|-----------|-----------|
| 15 | 1  | 0 | 3.638014  | 0.568507  | 0.200548  |
| 16 | 1  | 0 | 4.453116  | -0.941073 | -0.261123 |
| 17 | 1  | 0 | 3.499467  | -0.033727 | -1.464141 |
| 18 | 1  | 0 | 3.325895  | -2.199208 | 1.923781  |
| 19 | 1  | 0 | 2.264088  | -0.834751 | 2.426120  |
| 20 | 1  | 0 | 1.553594  | -2.420948 | 2.122493  |
| 21 | 1  | 0 | -0.102453 | -0.679136 | -3.012953 |
| 22 | 1  | 0 | -0.428735 | -2.246837 | -2.131953 |
| 23 | 1  | 0 | -3.566064 | -1.274950 | -1.621919 |
| 24 | 1  | 0 | -4.650458 | 0.110940  | -1.324424 |
| 25 | 1  | 0 | -3.264593 | 0.275573  | -2.433798 |
| 26 | 1  | 0 | -2.808274 | -0.136695 | 2.254763  |
| 27 | 1  | 0 | -4.396718 | -0.040407 | 1.417172  |
| 28 | 1  | 0 | -3.362773 | -1.503632 | 1.277407  |
| 29 | 1  | 0 | -3.901180 | 2.302929  | 0.203175  |
| 30 | 1  | 0 | -2.284999 | 2.468196  | 0.950673  |
| 31 | 1  | 0 | -2.469393 | 2.650805  | -0.805074 |
| 32 | 6  | 0 | 0.760518  | 1.870327  | -0.742941 |
| 33 | 6  | 0 | 0.015260  | 1.480719  | -1.647838 |
| 34 | 6  | 0 | 1.642321  | 2.701923  | 0.104582  |
| 35 | 6  | 0 | 0.829274  | 3.812280  | 0.803378  |
| 36 | 6  | 0 | 2.774652  | 3.306582  | -0.754369 |
| 37 | 1  | 0 | -0.505334 | 1.527820  | -2.583464 |
| 38 | 1  | 0 | 2.067588  | 2.071747  | 0.891736  |
| 39 | 1  | 0 | 0.079344  | 3.369765  | 1.461441  |
| 40 | 1  | 0 | 0.335737  | 4.457664  | 0.067411  |
| 41 | 1  | 0 | 1.502959  | 4.432271  | 1.406197  |
| 42 | 1  | 0 | 2.364381  | 3.973662  | -1.520758 |
| 43 | 1  | 0 | 3.364600  | 2.535379  | -1.258348 |
| 44 | 1  | 0 | 3.446716  | 3.894124  | -0.118472 |
| 45 | 17 | 0 | -0.113557 | 0.618499  | 2.072090  |

### TS (9-10) c

|                                              |              |
|----------------------------------------------|--------------|
| Zero-point correction=                       | 0.373636     |
| (Hartree/Particle)                           |              |
| Thermal correction to Energy=                | 0.402103     |
| Thermal correction to Enthalpy=              | 0.403047     |
| Thermal correction to Gibbs Free Energy=     | 0.316441     |
| Sum of electronic and zero-point Energies=   | -2170.769097 |
| Sum of electronic and thermal Energies=      | -2170.740630 |
| Sum of electronic and thermal Enthalpies=    | -2170.739686 |
| Sum of electronic and thermal Free Energies= | -2170.826292 |

| Center<br>Number | Atomic<br>Number | Atomic<br>Type | Coordinates (Angstroms) |           |           |
|------------------|------------------|----------------|-------------------------|-----------|-----------|
|                  |                  |                | X                       | Y         | Z         |
| 1                | 44               | 0              | -0.091444               | -0.360104 | -0.263437 |
| 2                | 15               | 0              | 2.248221                | -0.979850 | -0.049704 |
| 3                | 6                | 0              | 2.726642                | -2.441008 | -1.077202 |
| 4                | 6                | 0              | 3.571811                | 0.244569  | -0.476823 |
| 5                | 6                | 0              | 2.723673                | -1.512295 | 1.645492  |
| 6                | 17               | 0              | -0.531305               | -2.616015 | 0.615647  |
| 7                | 6                | 0              | -0.107382               | -0.851663 | -2.090510 |
| 8                | 15               | 0              | -2.499375               | -0.094474 | -0.158567 |
| 9                | 6                | 0              | -3.452361               | -1.190046 | -1.306411 |
| 10               | 6                | 0              | -3.238615               | -0.505905 | 1.474053  |
| 11               | 6                | 0              | -3.221658               | 1.570802  | -0.524276 |
| 12               | 1                | 0              | 2.670561                | -2.199975 | -2.143720 |

|    |    |   |           |           |           |
|----|----|---|-----------|-----------|-----------|
| 13 | 1  | 0 | 3.746167  | -2.769613 | -0.847242 |
| 14 | 1  | 0 | 2.023037  | -3.250934 | -0.864842 |
| 15 | 1  | 0 | 3.512271  | 1.098712  | 0.204071  |
| 16 | 1  | 0 | 4.567647  | -0.204238 | -0.389011 |
| 17 | 1  | 0 | 3.435931  | 0.609624  | -1.499853 |
| 18 | 1  | 0 | 3.773044  | -1.827683 | 1.675643  |
| 19 | 1  | 0 | 2.549054  | -0.687928 | 2.340267  |
| 20 | 1  | 0 | 2.072061  | -2.338040 | 1.941382  |
| 21 | 1  | 0 | 0.787621  | -0.992936 | -2.711550 |
| 22 | 1  | 0 | -1.016276 | -0.983799 | -2.693810 |
| 23 | 1  | 0 | -3.131203 | -2.223275 | -1.145091 |
| 24 | 1  | 0 | -4.529005 | -1.111459 | -1.119455 |
| 25 | 1  | 0 | -3.262668 | -0.922976 | -2.351466 |
| 26 | 1  | 0 | -2.808879 | 0.151294  | 2.232751  |
| 27 | 1  | 0 | -4.329104 | -0.399765 | 1.441661  |
| 28 | 1  | 0 | -2.965356 | -1.532631 | 1.728548  |
| 29 | 1  | 0 | -4.313836 | 1.553822  | -0.436663 |
| 30 | 1  | 0 | -2.819103 | 2.302905  | 0.181063  |
| 31 | 1  | 0 | -2.951520 | 1.889352  | -1.536047 |
| 32 | 6  | 0 | 0.477702  | 1.844668  | -0.678460 |
| 33 | 6  | 0 | 0.114758  | 1.441791  | -1.801859 |
| 34 | 6  | 0 | 0.972773  | 2.910427  | 0.235018  |
| 35 | 6  | 0 | -0.202058 | 3.726772  | 0.810116  |
| 36 | 6  | 0 | 1.969780  | 3.818210  | -0.513377 |
| 37 | 1  | 0 | -0.183201 | 1.503487  | -2.829215 |
| 38 | 1  | 0 | 1.468058  | 2.426431  | 1.082601  |
| 39 | 1  | 0 | -0.851731 | 3.082478  | 1.406081  |
| 40 | 1  | 0 | -0.782341 | 4.201028  | 0.009815  |
| 41 | 1  | 0 | 0.190792  | 4.515177  | 1.462160  |
| 42 | 1  | 0 | 1.477532  | 4.343698  | -1.339891 |
| 43 | 1  | 0 | 2.808642  | 3.247968  | -0.924538 |
| 44 | 1  | 0 | 2.372016  | 4.570421  | 0.174949  |
| 45 | 17 | 0 | -0.041034 | 0.473095  | 2.178007  |

## 10c

Zero-point correction= 0.378620  
(Hartree/Particle)  
Thermal correction to Energy= 0.406696  
Thermal correction to Enthalpy= 0.407640  
Thermal correction to Gibbs Free Energy= 0.321319  
Sum of electronic and zero-point Energies= -2170.836427  
Sum of electronic and thermal Energies= -2170.808352  
Sum of electronic and thermal Enthalpies= -2170.807407  
Sum of electronic and thermal Free Energies= -2170.893729

| Center<br>Number | Atomic<br>Number | Atomic<br>Type | Coordinates (Angstroms) |           |           |
|------------------|------------------|----------------|-------------------------|-----------|-----------|
|                  |                  |                | X                       | Y         | Z         |
| 1                | 44               | 0              | -0.042365               | -0.125518 | -0.168632 |
| 2                | 15               | 0              | 2.246229                | -0.906624 | 0.113027  |
| 3                | 6                | 0              | 3.096745                | -1.622343 | -1.361229 |
| 4                | 6                | 0              | 3.460216                | 0.333629  | 0.747642  |
| 5                | 6                | 0              | 2.378100                | -2.251307 | 1.359940  |
| 6                | 6                | 0              | 0.333800                | 0.363723  | -2.450534 |
| 7                | 15               | 0              | -2.441191               | -0.327842 | 0.028336  |
| 8                | 6                | 0              | -3.289764               | -0.807926 | -1.536175 |
| 9                | 6                | 0              | -3.003686               | -1.575800 | 1.251307  |
| 10               | 6                | 0              | -3.332855               | 1.198786  | 0.564826  |

|    |    |   |           |           |           |
|----|----|---|-----------|-----------|-----------|
| 11 | 1  | 0 | 3.314736  | -0.848054 | -2.103460 |
| 12 | 1  | 0 | 4.039463  | -2.095861 | -1.065377 |
| 13 | 1  | 0 | 2.436168  | -2.370672 | -1.807558 |
| 14 | 1  | 0 | 3.061775  | 0.767069  | 1.669567  |
| 15 | 1  | 0 | 4.426527  | -0.137369 | 0.960555  |
| 16 | 1  | 0 | 3.608755  | 1.133547  | 0.016097  |
| 17 | 1  | 0 | 3.427422  | -2.543280 | 1.484540  |
| 18 | 1  | 0 | 1.967159  | -1.890316 | 2.304985  |
| 19 | 1  | 0 | 1.781792  | -3.101004 | 1.022445  |
| 20 | 1  | 0 | 1.402686  | 0.210572  | -2.491490 |
| 21 | 1  | 0 | -0.244309 | -0.111371 | -3.237733 |
| 22 | 1  | 0 | -2.849575 | -1.747471 | -1.880589 |
| 23 | 1  | 0 | -4.366339 | -0.937492 | -1.378210 |
| 24 | 1  | 0 | -3.133599 | -0.042283 | -2.303047 |
| 25 | 1  | 0 | -2.591497 | -1.313713 | 2.228309  |
| 26 | 1  | 0 | -4.098833 | -1.599342 | 1.291128  |
| 27 | 1  | 0 | -2.609559 | -2.550175 | 0.956549  |
| 28 | 1  | 0 | -4.409383 | 1.013440  | 0.651791  |
| 29 | 1  | 0 | -2.938961 | 1.501671  | 1.539090  |
| 30 | 1  | 0 | -3.170174 | 2.011699  | -0.149041 |
| 31 | 17 | 0 | -0.362386 | -2.679008 | -0.632927 |
| 32 | 6  | 0 | 0.296739  | 1.701263  | -0.402531 |
| 33 | 6  | 0 | -0.223661 | 1.420349  | -1.725514 |
| 34 | 6  | 0 | 0.694279  | 2.969342  | 0.273570  |
| 35 | 6  | 0 | -0.554676 | 3.851292  | 0.512343  |
| 36 | 6  | 0 | 1.752457  | 3.737882  | -0.544231 |
| 37 | 1  | 0 | -1.199966 | 1.816186  | -2.020245 |
| 38 | 1  | 0 | 1.103682  | 2.707377  | 1.255051  |
| 39 | 1  | 0 | -1.272099 | 3.343939  | 1.161829  |
| 40 | 1  | 0 | -1.050194 | 4.109539  | -0.431467 |
| 41 | 1  | 0 | -0.251908 | 4.785859  | 0.997952  |
| 42 | 1  | 0 | 1.347878  | 4.048938  | -1.514445 |
| 43 | 1  | 0 | 2.643655  | 3.129281  | -0.730016 |
| 44 | 1  | 0 | 2.066846  | 4.636022  | -0.000404 |
| 45 | 17 | 0 | -0.067015 | -0.015127 | 2.323285  |

## 11

Zero-point correction= 0.296561  
(Hartree/Particle)  
Thermal correction to Energy= 0.319201  
Thermal correction to Enthalpy= 0.320145  
Thermal correction to Gibbs Free Energy= 0.244156  
Sum of electronic and zero-point Energies= -1820.507054  
Sum of electronic and thermal Energies= -1820.484415  
Sum of electronic and thermal Enthalpies= -1820.483471  
Sum of electronic and thermal Free Energies= -1820.559459

| Center<br>Number | Atomic<br>Number | Atomic<br>Type | Coordinates (Angstroms) |           |           |
|------------------|------------------|----------------|-------------------------|-----------|-----------|
|                  |                  |                | X                       | Y         | Z         |
| 1                | 6                | 0              | -2.360932               | -2.241255 | -1.039947 |
| 2                | 6                | 0              | 0.263070                | -0.721582 | -1.795373 |
| 3                | 17               | 0              | 0.122488                | -1.745188 | 1.527198  |
| 4                | 44               | 0              | 0.235932                | 0.007821  | -0.125082 |
| 5                | 15               | 0              | 2.667260                | -0.101162 | 0.042837  |
| 6                | 6                | 0              | 3.408648                | -1.793089 | 0.041228  |
| 7                | 6                | 0              | 3.660252                | 0.787010  | -1.236300 |
| 8                | 6                | 0              | 3.281186                | 0.622875  | 1.626686  |

|    |    |   |           |           |           |
|----|----|---|-----------|-----------|-----------|
| 9  | 6  | 0 | -1.886250 | 0.051428  | -0.085845 |
| 10 | 6  | 0 | -4.093691 | 0.671951  | 0.456017  |
| 11 | 7  | 0 | -2.668856 | 1.028694  | 0.427825  |
| 12 | 7  | 0 | -2.709251 | -0.928109 | -0.530326 |
| 13 | 6  | 0 | -4.132946 | -0.584026 | -0.418985 |
| 14 | 6  | 0 | -2.247796 | 2.128300  | 1.277287  |
| 15 | 1  | 0 | -2.995914 | -2.989511 | -0.550103 |
| 16 | 1  | 0 | -1.323386 | -2.465768 | -0.802258 |
| 17 | 1  | 0 | -2.523823 | -2.312049 | -2.124546 |
| 18 | 1  | 0 | 1.163309  | -1.133007 | -2.270218 |
| 19 | 1  | 0 | -0.626712 | -0.741572 | -2.434405 |
| 20 | 1  | 0 | 3.222586  | -2.274118 | -0.924917 |
| 21 | 1  | 0 | 4.489485  | -1.762741 | 0.218635  |
| 22 | 1  | 0 | 2.919728  | -2.388912 | 0.816579  |
| 23 | 1  | 0 | 3.334911  | 1.829889  | -1.270408 |
| 24 | 1  | 0 | 4.733665  | 0.735852  | -1.022193 |
| 25 | 1  | 0 | 3.472921  | 0.343049  | -2.219635 |
| 26 | 1  | 0 | 4.372143  | 0.556712  | 1.708818  |
| 27 | 1  | 0 | 2.978171  | 1.673306  | 1.677337  |
| 28 | 1  | 0 | 2.821751  | 0.086724  | 2.462730  |
| 29 | 1  | 0 | -4.706359 | 1.490805  | 0.064892  |
| 30 | 1  | 0 | -4.409590 | 0.473577  | 1.490655  |
| 31 | 1  | 0 | -4.558042 | -0.390676 | -1.413782 |
| 32 | 1  | 0 | -4.693938 | -1.408087 | 0.035010  |
| 33 | 1  | 0 | -1.188797 | 2.327317  | 1.133155  |
| 34 | 1  | 0 | -2.804973 | 3.033354  | 1.009444  |
| 35 | 1  | 0 | -2.449846 | 1.893564  | 2.332848  |
| 36 | 17 | 0 | 0.505764  | 2.354706  | -0.661766 |

## 12

Zero-point correction= 0.181056  
(Hartree/Particle)  
Thermal correction to Energy= 0.195533  
Thermal correction to Enthalpy= 0.196477  
Thermal correction to Gibbs Free Energy= 0.138402  
Sum of electronic and zero-point Energies= -1359.493552  
Sum of electronic and thermal Energies= -1359.479075  
Sum of electronic and thermal Enthalpies= -1359.478131  
Sum of electronic and thermal Free Energies= -1359.536206

| Center<br>Number | Atomic<br>Number | Atomic<br>Type | Coordinates (Angstroms) |           |           |
|------------------|------------------|----------------|-------------------------|-----------|-----------|
|                  |                  |                | X                       | Y         | Z         |
| 1                | 17               | 0              | 0.720657                | -1.849829 | 1.642099  |
| 2                | 44               | 0              | 1.045916                | -0.225472 | -0.038248 |
| 3                | 6                | 0              | 1.118417                | -1.058002 | -1.644296 |
| 4                | 6                | 0              | -0.885071               | 0.177475  | -0.102847 |
| 5                | 6                | 0              | -2.924427               | 1.251635  | 0.312011  |
| 6                | 7                | 0              | -1.459130               | 1.336063  | 0.310027  |
| 7                | 7                | 0              | -1.868732               | -0.652383 | -0.528088 |
| 8                | 6                | 0              | -3.181271               | 0.003627  | -0.537404 |
| 9                | 17               | 0              | 2.065848                | 1.840866  | -0.583077 |
| 10               | 6                | 0              | -0.849653               | 2.372913  | 1.128469  |
| 11               | 6                | 0              | -1.778828               | -2.035779 | -0.962027 |
| 12               | 1                | 0              | 0.324305                | -1.098836 | -2.395245 |
| 13               | 1                | 0              | 2.070663                | -1.531154 | -1.927926 |
| 14               | 1                | 0              | -3.363788               | 2.159896  | -0.111407 |
| 15               | 1                | 0              | -3.291640               | 1.138168  | 1.342511  |

|    |   |   |           |           |           |
|----|---|---|-----------|-----------|-----------|
| 16 | 1 | 0 | -3.476535 | 0.251236  | -1.566587 |
| 17 | 1 | 0 | -3.943152 | -0.656955 | -0.111908 |
| 18 | 1 | 0 | -1.059309 | 2.197082  | 2.193334  |
| 19 | 1 | 0 | 0.224783  | 2.403983  | 0.960070  |
| 20 | 1 | 0 | -1.268919 | 3.343579  | 0.843833  |
| 21 | 1 | 0 | -0.836070 | -2.466783 | -0.631775 |
| 22 | 1 | 0 | -2.597392 | -2.599162 | -0.499698 |
| 23 | 1 | 0 | -1.873824 | -2.124891 | -2.052673 |

### 13a

|                                              |              |
|----------------------------------------------|--------------|
| Zero-point correction=                       | 0.210979     |
| (Hartree/Particle)                           |              |
| Thermal correction to Energy=                | 0.228383     |
| Thermal correction to Enthalpy=              | 0.229328     |
| Thermal correction to Gibbs Free Energy=     | 0.165605     |
| Sum of electronic and zero-point Energies=   | -1436.807106 |
| Sum of electronic and thermal Energies=      | -1436.789701 |
| Sum of electronic and thermal Enthalpies=    | -1436.788757 |
| Sum of electronic and thermal Free Energies= | -1436.852480 |

| Center<br>Number | Atomic<br>Number | Atomic<br>Type | Coordinates (Angstroms) |           |           |
|------------------|------------------|----------------|-------------------------|-----------|-----------|
|                  |                  |                | X                       | Y         | Z         |
| 1                | 17               | 0              | 0.532217                | 2.262202  | -1.025470 |
| 2                | 44               | 0              | 0.956026                | 0.077918  | 0.072170  |
| 3                | 6                | 0              | 1.184953                | 0.925347  | 1.662749  |
| 4                | 6                | 0              | -1.120245               | -0.057760 | -0.024217 |
| 5                | 6                | 0              | -3.115923               | -0.951768 | -0.831292 |
| 6                | 7                | 0              | -1.660183               | -0.830383 | -0.982924 |
| 7                | 7                | 0              | -2.104422               | 0.510688  | 0.688417  |
| 8                | 6                | 0              | -3.425828               | 0.221997  | 0.104727  |
| 9                | 6                | 0              | -0.933225               | -1.775586 | -1.814107 |
| 10               | 6                | 0              | -1.987664               | 1.621269  | 1.612723  |
| 11               | 17               | 0              | 0.738199                | -2.083855 | 1.278928  |
| 12               | 1                | 0              | 1.321493                | 0.350510  | 2.583557  |
| 13               | 1                | 0              | 1.291702                | 2.013661  | 1.704024  |
| 14               | 1                | 0              | -3.365533               | -1.921476 | -0.378198 |
| 15               | 1                | 0              | -3.618132               | -0.877510 | -1.800270 |
| 16               | 1                | 0              | -4.149349               | -0.026783 | 0.886255  |
| 17               | 1                | 0              | -3.788058               | 1.104089  | -0.441552 |
| 18               | 1                | 0              | -0.819149               | -2.744552 | -1.314838 |
| 19               | 1                | 0              | 0.059117                | -1.382369 | -2.048046 |
| 20               | 1                | 0              | -1.473491               | -1.901685 | -2.757661 |
| 21               | 1                | 0              | -2.119316               | 2.579391  | 1.094473  |
| 22               | 1                | 0              | -1.001272               | 1.604341  | 2.072985  |
| 23               | 1                | 0              | -2.749374               | 1.518324  | 2.392349  |
| 24               | 6                | 0              | 2.755903                | 0.243006  | -1.104130 |
| 25               | 6                | 0              | 2.802435                | -0.862155 | -0.528843 |
| 26               | 1                | 0              | 3.007857                | 1.097099  | -1.702775 |
| 27               | 1                | 0              | 3.131063                | -1.821592 | -0.178667 |

### TS (13-14) a

|                                            |              |
|--------------------------------------------|--------------|
| Zero-point correction=                     | 0.209240     |
| (Hartree/Particle)                         |              |
| Thermal correction to Energy=              | 0.226748     |
| Thermal correction to Enthalpy=            | 0.227692     |
| Thermal correction to Gibbs Free Energy=   | 0.162426     |
| Sum of electronic and zero-point Energies= | -1436.787501 |

Sum of electronic and thermal Energies= -1436.769993  
 Sum of electronic and thermal Enthalpies= -1436.769048  
 Sum of electronic and thermal Free Energies= -1436.834315

| Center<br>Number | Atomic<br>Number | Atomic<br>Type | Coordinates (Angstroms) |           |           |
|------------------|------------------|----------------|-------------------------|-----------|-----------|
|                  |                  |                | X                       | Y         | Z         |
| 1                | 17               | 0              | -0.871503               | -2.113582 | -1.222278 |
| 2                | 44               | 0              | -0.825290               | -0.005062 | 0.003777  |
| 3                | 6                | 0              | -1.533772               | -0.767052 | 1.519956  |
| 4                | 6                | 0              | 1.206433                | -0.052779 | -0.004150 |
| 5                | 6                | 0              | 3.316240                | 0.618045  | -0.734070 |
| 6                | 7                | 0              | 1.880712                | 0.516628  | -1.022735 |
| 7                | 7                | 0              | 2.088637                | -0.538889 | 0.885157  |
| 8                | 6                | 0              | 3.471429                | -0.405682 | 0.398369  |
| 9                | 6                | 0              | -3.268209               | 0.021579  | 0.104874  |
| 10               | 6                | 0              | -2.757408               | 0.605386  | -0.860206 |
| 11               | 6                | 0              | 1.257167                | 1.348052  | -2.037727 |
| 12               | 6                | 0              | 1.811087                | -1.438625 | 1.985960  |
| 13               | 17               | 0              | -0.670706               | 2.221555  | 1.014472  |
| 14               | 1                | 0              | -1.734139               | -0.167678 | 2.415288  |
| 15               | 1                | 0              | -1.783477               | -1.833651 | 1.556008  |
| 16               | 1                | 0              | 3.566940                | 1.636854  | -0.405969 |
| 17               | 1                | 0              | 3.912852                | 0.376689  | -1.618747 |
| 18               | 1                | 0              | 4.134085                | -0.065266 | 1.199487  |
| 19               | 1                | 0              | 3.833470                | -1.376976 | 0.032306  |
| 20               | 1                | 0              | -3.950402               | -0.416516 | 0.801591  |
| 21               | 1                | 0              | -2.752990               | 1.176768  | -1.768064 |
| 22               | 1                | 0              | 1.089502                | 2.370998  | -1.679863 |
| 23               | 1                | 0              | 0.300663                | 0.903451  | -2.332362 |
| 24               | 1                | 0              | 1.895003                | 1.364292  | -2.926772 |
| 25               | 1                | 0              | 2.034462                | -2.478400 | 1.711165  |
| 26               | 1                | 0              | 0.759182                | -1.362629 | 2.256420  |
| 27               | 1                | 0              | 2.421915                | -1.158458 | 2.851041  |

## 14a

Zero-point correction= 0.214905  
 (Hartree/Particle)  
 Thermal correction to Energy= 0.231906  
 Thermal correction to Enthalpy= 0.232851  
 Thermal correction to Gibbs Free Energy= 0.168345  
 Sum of electronic and zero-point Energies= -1436.867412  
 Sum of electronic and thermal Energies= -1436.850410  
 Sum of electronic and thermal Enthalpies= -1436.849466  
 Sum of electronic and thermal Free Energies= -1436.913972

| Center<br>Number | Atomic<br>Number | Atomic<br>Type | Coordinates (Angstroms) |           |           |
|------------------|------------------|----------------|-------------------------|-----------|-----------|
|                  |                  |                | X                       | Y         | Z         |
| 1                | 17               | 0              | 0.705930                | 2.590674  | -0.545495 |
| 2                | 44               | 0              | 0.690173                | 0.344508  | 0.227374  |
| 3                | 6                | 0              | 3.690812                | -0.885576 | -0.434154 |
| 4                | 6                | 0              | -1.181325               | -0.166834 | -0.105800 |
| 5                | 6                | 0              | -3.088979               | -1.415579 | -0.661972 |
| 6                | 7                | 0              | -1.621738               | -1.336739 | -0.647483 |
| 7                | 7                | 0              | -2.261326               | 0.596994  | 0.178544  |
| 8                | 6                | 0              | -3.506325               | 0.021757  | -0.336501 |
| 9                | 6                | 0              | 2.810430                | -0.655621 | -1.430004 |



|    |    |   |           |           |           |
|----|----|---|-----------|-----------|-----------|
| 10 | 6  | 0 | 1.376635  | -0.501477 | -1.250446 |
| 11 | 6  | 0 | -0.901738 | -2.599553 | -0.735623 |
| 12 | 6  | 0 | -2.298249 | 1.943785  | 0.721277  |
| 13 | 17 | 0 | 0.912262  | -1.172364 | 2.032231  |
| 14 | 1  | 0 | 3.363357  | -1.018528 | 0.593858  |
| 15 | 1  | 0 | 4.753306  | -0.982290 | -0.638360 |
| 16 | 1  | 0 | -3.426369 | -2.129735 | 0.102805  |
| 17 | 1  | 0 | -3.454530 | -1.760023 | -1.634765 |
| 18 | 1  | 0 | -4.301782 | 0.080497  | 0.413666  |
| 19 | 1  | 0 | -3.833951 | 0.575722  | -1.227532 |
| 20 | 1  | 0 | 3.175973  | -0.590200 | -2.457724 |
| 21 | 1  | 0 | 0.739137  | -0.792138 | -2.093456 |
| 22 | 1  | 0 | -1.407062 | -3.347907 | -0.111059 |
| 23 | 1  | 0 | 0.114093  | -2.482019 | -0.366791 |
| 24 | 1  | 0 | -0.887041 | -2.964634 | -1.769766 |
| 25 | 1  | 0 | -2.543650 | 2.676501  | -0.056844 |
| 26 | 1  | 0 | -1.332346 | 2.212798  | 1.141982  |
| 27 | 1  | 0 | -3.062142 | 1.985123  | 1.506902  |

### 13b

Zero-point correction= 0.239592  
(Hartree/Particle)  
Thermal correction to Energy= 0.258742  
Thermal correction to Enthalpy= 0.259686  
Thermal correction to Gibbs Free Energy= 0.191825  
Sum of electronic and zero-point Energies= -1476.103115  
Sum of electronic and thermal Energies= -1476.083964  
Sum of electronic and thermal Enthalpies= -1476.083020  
Sum of electronic and thermal Free Energies= -1476.150881

| Center<br>Number | Atomic<br>Number | Atomic<br>Type | Coordinates (Angstroms) |           |           |
|------------------|------------------|----------------|-------------------------|-----------|-----------|
|                  |                  |                | X                       | Y         | Z         |
| 1                | 17               | 0              | -0.740563               | -2.237913 | 0.461145  |
| 2                | 44               | 0              | -0.753679               | 0.134416  | -0.262965 |
| 3                | 6                | 0              | -2.473015               | 1.278718  | 0.256403  |
| 4                | 17               | 0              | -0.036410               | 2.385459  | -1.051808 |
| 5                | 6                | 0              | -2.768503               | 0.124262  | 0.638023  |
| 6                | 6                | 0              | -0.876149               | -0.411885 | -1.991811 |
| 7                | 6                | 0              | -3.578396               | -0.971596 | 1.193057  |
| 8                | 1                | 0              | -2.570945               | 2.325230  | 0.038454  |
| 9                | 1                | 0              | -0.811751               | 0.312659  | -2.808882 |
| 10               | 1                | 0              | -1.116514               | -1.452032 | -2.232512 |
| 11               | 1                | 0              | -4.512602               | -0.569754 | 1.603044  |
| 12               | 1                | 0              | -3.812444               | -1.702433 | 0.412706  |
| 13               | 1                | 0              | -3.032201               | -1.509563 | 1.971787  |
| 14               | 6                | 0              | 1.284494                | -0.067401 | 0.114125  |
| 15               | 6                | 0              | 3.526819                | -0.673391 | 0.224150  |
| 16               | 7                | 0              | 2.279962                | -0.661361 | -0.560079 |
| 17               | 7                | 0              | 1.774986                | 0.457444  | 1.252143  |
| 18               | 6                | 0              | 3.241164                | 0.382621  | 1.297398  |
| 19               | 6                | 0              | 2.156175                | -1.577020 | -1.677469 |
| 20               | 6                | 0              | 1.068859                | 1.385510  | 2.119955  |
| 21               | 1                | 0              | 4.385334                | -0.428669 | -0.407768 |
| 22               | 1                | 0              | 3.681623                | -1.671877 | 0.656675  |
| 23               | 1                | 0              | 3.673956                | 1.360576  | 1.043152  |
| 24               | 1                | 0              | 3.588485                | 0.093018  | 2.293461  |
| 25               | 1                | 0              | 2.039920                | -2.610899 | -1.329510 |

|    |   |   |          |           |           |
|----|---|---|----------|-----------|-----------|
| 26 | 1 | 0 | 1.284859 | -1.305751 | -2.271684 |
| 27 | 1 | 0 | 3.052575 | -1.497608 | -2.300864 |
| 28 | 1 | 0 | 0.008705 | 1.123944  | 2.164569  |
| 29 | 1 | 0 | 1.478579 | 1.302295  | 3.131530  |
| 30 | 1 | 0 | 1.159516 | 2.416788  | 1.760107  |

### TS (13-14) b

Zero-point correction= 0.238492  
(Hartree/Particle)  
Thermal correction to Energy= 0.257535  
Thermal correction to Enthalpy= 0.258479  
Thermal correction to Gibbs Free Energy= 0.189217  
Sum of electronic and zero-point Energies= -1476.082863  
Sum of electronic and thermal Energies= -1476.063820  
Sum of electronic and thermal Enthalpies= -1476.062876  
Sum of electronic and thermal Free Energies= -1476.132138

| Center<br>Number | Atomic<br>Number | Atomic<br>Type | Coordinates (Angstroms) |           |           |
|------------------|------------------|----------------|-------------------------|-----------|-----------|
|                  |                  |                | X                       | Y         | Z         |
| 1                | 17               | 0              | 0.407838                | -1.987162 | -1.362616 |
| 2                | 44               | 0              | 0.594076                | 0.079716  | -0.061305 |
| 3                | 6                | 0              | 2.325397                | 0.693419  | -1.137601 |
| 4                | 17               | 0              | 0.645035                | 2.231672  | 1.112408  |
| 5                | 6                | 0              | 3.027547                | 0.070273  | -0.308002 |
| 6                | 6                | 0              | 1.592328                | -0.734087 | 1.258786  |
| 7                | 6                | 0              | 4.255552                | -0.498810 | 0.277467  |
| 8                | 1                | 0              | 2.256188                | 1.303164  | -2.020083 |
| 9                | 1                | 0              | 1.931088                | -0.175102 | 2.136712  |
| 10               | 1                | 0              | 1.824868                | -1.802868 | 1.211145  |
| 11               | 1                | 0              | 5.107053                | -0.172620 | -0.331470 |
| 12               | 1                | 0              | 4.417480                | -0.157212 | 1.305115  |
| 13               | 1                | 0              | 4.231491                | -1.593589 | 0.272285  |
| 14               | 6                | 0              | -1.441771               | 0.027692  | 0.113924  |
| 15               | 6                | 0              | -3.608647               | -0.740834 | 0.480984  |
| 16               | 7                | 0              | -2.194661               | -0.774523 | 0.888500  |
| 17               | 7                | 0              | -2.243733               | 0.768997  | -0.666282 |
| 18               | 6                | 0              | -3.666777               | 0.507311  | -0.413715 |
| 19               | 6                | 0              | -1.709701               | -1.908465 | 1.655983  |
| 20               | 6                | 0              | -1.831627               | 1.865381  | -1.524912 |
| 21               | 1                | 0              | -4.264762               | -0.674933 | 1.354359  |
| 22               | 1                | 0              | -3.856831               | -1.656765 | -0.072968 |
| 23               | 1                | 0              | -4.116792               | 1.370312  | 0.095987  |
| 24               | 1                | 0              | -4.208482               | 0.336999  | -1.349622 |
| 25               | 1                | 0              | -1.610318               | -2.801355 | 1.026573  |
| 26               | 1                | 0              | -0.735483               | -1.667262 | 2.080205  |
| 27               | 1                | 0              | -2.411094               | -2.106815 | 2.472697  |
| 28               | 1                | 0              | -0.813668               | 2.168409  | -1.269408 |
| 29               | 1                | 0              | -1.891214               | 1.582905  | -2.583066 |
| 30               | 1                | 0              | -2.482756               | 2.729972  | -1.350502 |

### 14b

Zero-point correction= 0.243337  
(Hartree/Particle)  
Thermal correction to Energy= 0.261669

Thermal correction to Enthalpy= 0.262613  
 Thermal correction to Gibbs Free Energy= 0.195350  
 Sum of electronic and zero-point Energies= -1476.156200  
 Sum of electronic and thermal Energies= -1476.137868  
 Sum of electronic and thermal Enthalpies= -1476.136924  
 Sum of electronic and thermal Free Energies= -1476.204187

| Center<br>Number | Atomic<br>Number | Atomic<br>Type | Coordinates (Angstroms) |           |           |
|------------------|------------------|----------------|-------------------------|-----------|-----------|
|                  |                  |                | X                       | Y         | Z         |
| 1                | 17               | 0              | 0.295799                | -0.752077 | 2.419911  |
| 2                | 44               | 0              | 0.439107                | 0.449454  | 0.384614  |
| 3                | 6                | 0              | 1.416265                | -0.552498 | -0.801260 |
| 4                | 17               | 0              | 0.609191                | 2.571136  | -0.678045 |
| 5                | 6                | 0              | 2.879311                | -0.570351 | -0.762128 |
| 6                | 6                | 0              | 3.597138                | 0.547684  | -0.523290 |
| 7                | 6                | 0              | 3.537831                | -1.912888 | -1.016206 |
| 8                | 1                | 0              | 0.944005                | -1.218402 | -1.532611 |
| 9                | 1                | 0              | 3.122215                | 1.516052  | -0.400182 |
| 10               | 1                | 0              | 4.683525                | 0.517802  | -0.496065 |
| 11               | 1                | 0              | 3.231408                | -2.322336 | -1.987633 |
| 12               | 1                | 0              | 4.628477                | -1.825274 | -1.011291 |
| 13               | 1                | 0              | 3.251998                | -2.644417 | -0.250477 |
| 14               | 6                | 0              | -1.330219               | -0.200423 | -0.203122 |
| 15               | 6                | 0              | -3.635210               | -0.239470 | -0.631033 |
| 16               | 7                | 0              | -2.438591               | 0.567718  | -0.367856 |
| 17               | 7                | 0              | -1.667621               | -1.484385 | -0.485878 |
| 18               | 6                | 0              | -3.037177               | -1.600040 | -0.998602 |
| 19               | 6                | 0              | -2.645555               | 1.923084  | 0.117273  |
| 20               | 6                | 0              | -0.877152               | -2.693388 | -0.337974 |
| 21               | 1                | 0              | -4.229750               | 0.202595  | -1.436393 |
| 22               | 1                | 0              | -4.260795               | -0.288502 | 0.272483  |
| 23               | 1                | 0              | -3.025593               | -1.772590 | -2.084000 |
| 24               | 1                | 0              | -3.555162               | -2.439646 | -0.524221 |
| 25               | 1                | 0              | -3.140929               | 1.909369  | 1.099025  |
| 26               | 1                | 0              | -1.695649               | 2.448625  | 0.185929  |
| 27               | 1                | 0              | -3.284884               | 2.462258  | -0.589837 |
| 28               | 1                | 0              | -0.018429               | -2.497090 | 0.300463  |
| 29               | 1                | 0              | -1.496092               | -3.458529 | 0.145006  |
| 30               | 1                | 0              | -0.547789               | -3.083483 | -1.310765 |

## 15b

Zero-point correction= 0.239350  
 (Hartree/Particle)  
 Thermal correction to Energy= 0.258766  
 Thermal correction to Enthalpy= 0.259710  
 Thermal correction to Gibbs Free Energy= 0.190836  
 Sum of electronic and zero-point Energies= -1476.102244  
 Sum of electronic and thermal Energies= -1476.082828  
 Sum of electronic and thermal Enthalpies= -1476.081884  
 Sum of electronic and thermal Free Energies= -1476.150758

| Center<br>Number | Atomic<br>Number | Atomic<br>Type | Coordinates (Angstroms) |          |           |
|------------------|------------------|----------------|-------------------------|----------|-----------|
|                  |                  |                | X                       | Y        | Z         |
| 1                | 17               | 0              | -0.147141               | 2.379679 | -1.026350 |
| 2                | 44               | 0              | 0.725182                | 0.323287 | 0.070850  |

|    |    |   |           |           |           |
|----|----|---|-----------|-----------|-----------|
| 3  | 6  | 0 | 0.771671  | 1.200138  | 1.659842  |
| 4  | 6  | 0 | -1.282325 | -0.232592 | -0.023711 |
| 5  | 6  | 0 | -3.125501 | -1.300387 | -0.979191 |
| 6  | 7  | 0 | -1.664480 | -1.183902 | -0.894268 |
| 7  | 7  | 0 | -2.361085 | 0.231929  | 0.617099  |
| 8  | 6  | 0 | -3.577398 | -0.518100 | 0.263371  |
| 9  | 6  | 0 | 2.416261  | 0.878597  | -1.116708 |
| 10 | 6  | 0 | 2.812808  | -0.150476 | -0.529717 |
| 11 | 17 | 0 | 0.927672  | -1.821449 | 1.304384  |
| 12 | 1  | 0 | 1.007142  | 0.666458  | 2.585468  |
| 13 | 1  | 0 | 0.658674  | 2.287538  | 1.701593  |
| 14 | 1  | 0 | -3.431254 | -2.351020 | -0.959998 |
| 15 | 1  | 0 | -3.488436 | -0.847603 | -1.912499 |
| 16 | 1  | 0 | -3.866156 | -1.181253 | 1.089901  |
| 17 | 1  | 0 | -4.406657 | 0.165495  | 0.059337  |
| 18 | 1  | 0 | 2.422484  | 1.757972  | -1.731791 |
| 19 | 6  | 0 | -0.813902 | -1.824286 | -1.879169 |
| 20 | 1  | 0 | -0.827281 | -1.286215 | -2.836481 |
| 21 | 1  | 0 | 0.207033  | -1.878407 | -1.495352 |
| 22 | 1  | 0 | -1.162102 | -2.849545 | -2.041764 |
| 23 | 6  | 0 | -2.386230 | 1.239506  | 1.662437  |
| 24 | 1  | 0 | -1.727338 | 2.062825  | 1.385403  |
| 25 | 1  | 0 | -3.407260 | 1.623763  | 1.742798  |
| 26 | 1  | 0 | -2.088310 | 0.825154  | 2.633398  |
| 27 | 6  | 0 | 3.724187  | -1.219260 | -0.092384 |
| 28 | 1  | 0 | 3.282551  | -2.205971 | -0.251988 |
| 29 | 1  | 0 | 4.670470  | -1.143524 | -0.641180 |
| 30 | 1  | 0 | 3.920935  | -1.135246 | 0.980725  |

## TS (15-16) b

Zero-point correction= 0.238248  
(Hartree/Particle)  
Thermal correction to Energy= 0.257363  
Thermal correction to Enthalpy= 0.258308  
Thermal correction to Gibbs Free Energy= 0.189350  
Sum of electronic and zero-point Energies= -1476.085589  
Sum of electronic and thermal Energies= -1476.066474  
Sum of electronic and thermal Enthalpies= -1476.065530  
Sum of electronic and thermal Free Energies= -1476.134487

| Center<br>Number | Atomic<br>Number | Atomic<br>Type | Coordinates (Angstroms) |           |           |
|------------------|------------------|----------------|-------------------------|-----------|-----------|
|                  |                  |                | X                       | Y         | Z         |
| 1                | 17               | 0              | 0.515517                | -1.877534 | 1.591085  |
| 2                | 44               | 0              | 0.657205                | -0.170136 | -0.152939 |
| 3                | 6                | 0              | 1.097673                | -1.377255 | -1.467998 |
| 4                | 6                | 0              | -1.359521               | 0.102687  | 0.012295  |
| 5                | 6                | 0              | -3.364291               | 1.043090  | 0.748265  |
| 6                | 7                | 0              | -1.917531               | 1.203874  | 0.555103  |
| 7                | 7                | 0              | -2.339179               | -0.748072 | -0.338610 |
| 8                | 6                | 0              | -3.669917               | -0.145228 | -0.173609 |
| 9                | 6                | 0              | 3.010073                | -0.605920 | -0.433236 |
| 10               | 6                | 0              | 2.764602                | 0.247227  | 0.435127  |
| 11               | 17               | 0              | 0.800179                | 1.715901  | -1.713286 |
| 12               | 1                | 0              | 1.285936                | -1.050883 | -2.496612 |
| 13               | 1                | 0              | 1.185808                | -2.449083 | -1.256706 |
| 14               | 1                | 0              | -3.896708               | 1.956124  | 0.465535  |

|    |   |   |           |           |           |
|----|---|---|-----------|-----------|-----------|
| 15 | 1 | 0 | -3.587228 | 0.818967  | 1.801473  |
| 16 | 1 | 0 | -4.067682 | 0.177448  | -1.146249 |
| 17 | 1 | 0 | -4.367704 | -0.862905 | 0.267520  |
| 18 | 1 | 0 | 3.562559  | -1.272831 | -1.060885 |
| 19 | 6 | 0 | -1.194100 | 2.274814  | 1.215089  |
| 20 | 1 | 0 | -1.029658 | 2.059539  | 2.280351  |
| 21 | 1 | 0 | -0.241445 | 2.428583  | 0.702611  |
| 22 | 1 | 0 | -1.771088 | 3.201064  | 1.128884  |
| 23 | 6 | 0 | -2.171598 | -2.018612 | -1.019558 |
| 24 | 1 | 0 | -1.295274 | -2.526613 | -0.616408 |
| 25 | 1 | 0 | -3.052592 | -2.636729 | -0.821915 |
| 26 | 1 | 0 | -2.068010 | -1.890697 | -2.105636 |
| 27 | 6 | 0 | 2.998612  | 1.244258  | 1.493096  |
| 28 | 1 | 0 | 2.469006  | 0.961090  | 2.408974  |
| 29 | 1 | 0 | 4.069896  | 1.310219  | 1.715852  |
| 30 | 1 | 0 | 2.648091  | 2.229471  | 1.167682  |

---

## 16b

|                                              |              |
|----------------------------------------------|--------------|
| Zero-point correction=                       | 0.243028     |
| (Hartree/Particle)                           |              |
| Thermal correction to Energy=                | 0.261603     |
| Thermal correction to Enthalpy=              | 0.262547     |
| Thermal correction to Gibbs Free Energy=     | 0.195233     |
| Sum of electronic and zero-point Energies=   | -1476.156757 |
| Sum of electronic and thermal Energies=      | -1476.138181 |
| Sum of electronic and thermal Enthalpies=    | -1476.137237 |
| Sum of electronic and thermal Free Energies= | -1476.204551 |

---

| Center<br>Number | Atomic<br>Number | Atomic<br>Type | Coordinates (Angstroms) |           |           |
|------------------|------------------|----------------|-------------------------|-----------|-----------|
|                  |                  |                | X                       | Y         | Z         |
| 1                | 17               | 0              | -0.383276               | -1.223331 | 2.257031  |
| 2                | 44               | 0              | -0.670508               | 0.194378  | 0.371093  |
| 3                | 6                | 0              | -3.726345               | 0.049663  | -0.210978 |
| 4                | 6                | 0              | 1.251465                | 0.003581  | -0.077627 |
| 5                | 6                | 0              | 3.328950                | -0.946017 | -0.621040 |
| 6                | 7                | 0              | 1.869965                | -1.111275 | -0.565052 |
| 7                | 7                | 0              | 2.193851                | 0.957939  | 0.093133  |
| 8                | 6                | 0              | 3.497710                | 0.565042  | -0.447971 |
| 9                | 6                | 0              | -2.886936               | -0.938916 | -0.572825 |
| 10               | 6                | 0              | -1.486055               | -0.740911 | -0.978156 |
| 11               | 17               | 0              | -1.034291               | 2.362413  | -0.587787 |
| 12               | 1                | 0              | -3.443727               | 1.095314  | -0.293013 |
| 13               | 1                | 0              | -4.727264               | -0.176317 | 0.146468  |
| 14               | 1                | 0              | 3.732035                | -1.320034 | -1.567544 |
| 15               | 1                | 0              | 3.795645                | -1.511491 | 0.198670  |
| 16               | 1                | 0              | 3.678764                | 1.079073  | -1.402719 |
| 17               | 1                | 0              | 4.302947                | 0.833691  | 0.243260  |
| 18               | 1                | 0              | -3.224424               | -1.977984 | -0.516848 |
| 19               | 6                | 0              | 1.377929                | -2.478594 | -0.490699 |
| 20               | 1                | 0              | 1.927541                | -3.030554 | 0.283092  |
| 21               | 1                | 0              | 0.325529                | -2.482409 | -0.221745 |
| 22               | 1                | 0              | 1.522826                | -2.984545 | -1.452674 |
| 23               | 6                | 0              | 2.024855                | 2.320425  | 0.568432  |
| 24               | 1                | 0              | 1.078163                | 2.425271  | 1.092778  |
| 25               | 1                | 0              | 2.846329                | 2.551110  | 1.256918  |
| 26               | 1                | 0              | 2.035257                | 3.037103  | -0.260638 |
| 27               | 6                | 0              | -1.028255               | -1.227125 | -2.315950 |

|    |   |   |           |           |           |
|----|---|---|-----------|-----------|-----------|
| 28 | 1 | 0 | 0.047794  | -1.124877 | -2.460028 |
| 29 | 1 | 0 | -1.325302 | -2.273315 | -2.482580 |
| 30 | 1 | 0 | -1.537723 | -0.626594 | -3.084320 |

### 13c

|                                              |              |
|----------------------------------------------|--------------|
| Zero-point correction=                       | 0.296946     |
| (Hartree/Particle)                           |              |
| Thermal correction to Energy=                | 0.318668     |
| Thermal correction to Enthalpy=              | 0.319612     |
| Thermal correction to Gibbs Free Energy=     | 0.245825     |
| Sum of electronic and zero-point Energies=   | -1554.672513 |
| Sum of electronic and thermal Energies=      | -1554.650791 |
| Sum of electronic and thermal Enthalpies=    | -1554.649847 |
| Sum of electronic and thermal Free Energies= | -1554.723633 |

| Center<br>Number | Atomic<br>Number | Atomic<br>Type | Coordinates (Angstroms) |           |           |
|------------------|------------------|----------------|-------------------------|-----------|-----------|
|                  |                  |                | X                       | Y         | Z         |
| 1                | 17               | 0              | 0.575957                | -2.086645 | -0.465412 |
| 2                | 44               | 0              | 0.267188                | 0.375169  | -0.383727 |
| 3                | 6                | 0              | 0.147727                | 0.406216  | -2.197023 |
| 4                | 6                | 0              | -1.655771               | -0.204292 | 0.166885  |
| 5                | 6                | 0              | -3.434113               | -0.380371 | 1.662754  |
| 6                | 7                | 0              | -2.006071               | -0.102516 | 1.462380  |
| 7                | 7                | 0              | -2.686652               | -0.708468 | -0.527469 |
| 8                | 6                | 0              | -3.789032               | -1.110134 | 0.362759  |
| 9                | 6                | 0              | 2.401026                | 0.374651  | 0.199705  |
| 10               | 6                | 0              | 1.938490                | 1.537715  | 0.246765  |
| 11               | 6                | 0              | -1.255199               | 0.607434  | 2.484751  |
| 12               | 6                | 0              | -2.661017               | -1.238528 | -1.876270 |
| 13               | 17               | 0              | -0.768096               | 2.640188  | -0.315942 |
| 14               | 6                | 0              | 3.437597                | -0.684375 | 0.273093  |
| 15               | 6                | 0              | 3.451199                | -1.330749 | 1.672715  |
| 16               | 6                | 0              | 4.812048                | -0.093726 | -0.099046 |
| 17               | 1                | 0              | -0.119581               | 1.328847  | -2.720546 |
| 18               | 1                | 0              | 0.444560                | -0.464159 | -2.790516 |
| 19               | 1                | 0              | -3.986732               | 0.563541  | 1.771995  |
| 20               | 1                | 0              | -3.594106               | -0.987069 | 2.558848  |
| 21               | 1                | 0              | -4.754198               | -0.808370 | -0.053964 |
| 22               | 1                | 0              | -3.784954               | -2.202404 | 0.485426  |
| 23               | 1                | 0              | 1.892434                | 2.603067  | 0.368342  |
| 24               | 1                | 0              | -1.500390               | 1.675637  | 2.492952  |
| 25               | 1                | 0              | -0.182890               | 0.497453  | 2.305990  |
| 26               | 1                | 0              | -1.481218               | 0.162388  | 3.458974  |
| 27               | 1                | 0              | -2.453000               | -2.315749 | -1.870187 |
| 28               | 1                | 0              | -1.883027               | -0.734464 | -2.447191 |
| 29               | 1                | 0              | -3.630844               | -1.054731 | -2.350332 |
| 30               | 1                | 0              | 3.169964                | -1.465079 | -0.446184 |
| 31               | 1                | 0              | 2.483487                | -1.789484 | 1.892461  |
| 32               | 1                | 0              | 3.680612                | -0.588701 | 2.446810  |
| 33               | 1                | 0              | 4.218921                | -2.111827 | 1.709308  |
| 34               | 1                | 0              | 5.116617                | 0.678298  | 0.616755  |
| 35               | 1                | 0              | 4.795686                | 0.354340  | -1.097990 |
| 36               | 1                | 0              | 5.570069                | -0.885348 | -0.090872 |

TS (13-14) c

```

Zero-point correction=                0.296019
(Hartree/Particle)
Thermal correction to Energy=         0.317458
Thermal correction to Enthalpy=       0.318402
Thermal correction to Gibbs Free Energy= 0.244106
Sum of electronic and zero-point Energies= -1554.652296
Sum of electronic and thermal Energies= -1554.630857
Sum of electronic and thermal Enthalpies= -1554.629913
Sum of electronic and thermal Free Energies= -1554.704209

```

---

| Center<br>Number | Atomic<br>Number | Atomic<br>Type | Coordinates (Angstroms) |           |           |
|------------------|------------------|----------------|-------------------------|-----------|-----------|
|                  |                  |                | X                       | Y         | Z         |
| 1                | 17               | 0              | -0.333153               | -1.995439 | -1.285482 |
| 2                | 44               | 0              | -0.135022               | 0.104699  | -0.062537 |
| 3                | 6                | 0              | -1.118027               | -0.520149 | 1.367591  |
| 4                | 6                | 0              | 1.889996                | -0.122532 | 0.014855  |
| 5                | 6                | 0              | 4.096912                | 0.369318  | -0.541003 |
| 6                | 7                | 0              | 2.680425                | 0.434003  | -0.922925 |
| 7                | 7                | 0              | 2.657752                | -0.754229 | 0.917283  |
| 8                | 6                | 0              | 4.075310                | -0.736611 | 0.522841  |
| 9                | 6                | 0              | -2.559103               | 0.418480  | -0.109727 |
| 10               | 6                | 0              | -1.844899               | 1.032316  | -0.939543 |
| 11               | 6                | 0              | 2.211842                | 1.394121  | -1.908226 |
| 12               | 6                | 0              | 2.209365                | -1.685759 | 1.932936  |
| 13               | 17               | 0              | 0.245624                | 2.279604  | 1.028977  |
| 14               | 6                | 0              | -3.841581               | -0.105024 | 0.436982  |
| 15               | 6                | 0              | -4.147657               | -1.516606 | -0.104175 |
| 16               | 6                | 0              | -4.962220               | 0.892866  | 0.075613  |
| 17               | 1                | 0              | -1.324118               | 0.113203  | 2.236211  |
| 18               | 1                | 0              | -1.478275               | -1.553166 | 1.396326  |
| 19               | 1                | 0              | 4.421866                | 1.333913  | -0.125597 |
| 20               | 1                | 0              | 4.725670                | 0.127516  | -1.402945 |
| 21               | 1                | 0              | 4.715967                | -0.520643 | 1.382982  |
| 22               | 1                | 0              | 4.360378                | -1.714862 | 0.109928  |
| 23               | 1                | 0              | -1.757748               | 1.729239  | -1.752921 |
| 24               | 1                | 0              | 2.121731                | 2.400789  | -1.482930 |
| 25               | 1                | 0              | 1.236308                | 1.076214  | -2.289924 |
| 26               | 1                | 0              | 2.907494                | 1.404798  | -2.752939 |
| 27               | 1                | 0              | 2.361996                | -2.723761 | 1.608228  |
| 28               | 1                | 0              | 1.148543                | -1.526539 | 2.119673  |
| 29               | 1                | 0              | 2.766568                | -1.514738 | 2.860597  |
| 30               | 1                | 0              | -3.776720               | -0.155714 | 1.530930  |
| 31               | 1                | 0              | -3.329385               | -2.214103 | 0.092609  |
| 32               | 1                | 0              | -4.296543               | -1.484013 | -1.188229 |
| 33               | 1                | 0              | -5.061826               | -1.900209 | 0.363271  |
| 34               | 1                | 0              | -5.070003               | 0.977034  | -1.011246 |
| 35               | 1                | 0              | -4.755740               | 1.887626  | 0.481718  |
| 36               | 1                | 0              | -5.914074               | 0.538916  | 0.487107  |

---

## 14c

```

Zero-point correction=                0.299920
(Hartree/Particle)
Thermal correction to Energy=         0.320848
Thermal correction to Enthalpy=       0.321792
Thermal correction to Gibbs Free Energy= 0.248405
Sum of electronic and zero-point Energies= -1554.691178

```

Sum of electronic and thermal Energies= -1554.670250  
 Sum of electronic and thermal Enthalpies= -1554.669306  
 Sum of electronic and thermal Free Energies= -1554.742693

| Center Number | Atomic Number | Atomic Type | Coordinates (Angstroms) |           |           |
|---------------|---------------|-------------|-------------------------|-----------|-----------|
|               |               |             | X                       | Y         | Z         |
| 1             | 17            | 0           | 0.384714                | 2.052049  | -1.170468 |
| 2             | 44            | 0           | 0.231417                | -0.047758 | -0.094869 |
| 3             | 6             | 0           | 1.516912                | 0.136956  | 1.523270  |
| 4             | 6             | 0           | -1.857732               | 0.092630  | -0.060944 |
| 5             | 6             | 0           | -4.076697               | -0.313520 | -0.627596 |
| 6             | 7             | 0           | -2.657484               | -0.479776 | -0.974521 |
| 7             | 7             | 0           | -2.598772               | 0.806244  | 0.794075  |
| 8             | 6             | 0           | -4.017996               | 0.820684  | 0.408120  |
| 9             | 6             | 0           | 2.423948                | -0.474045 | 0.516233  |
| 10            | 6             | 0           | 1.729020                | -1.223217 | -0.389119 |
| 11            | 6             | 0           | -2.249355               | -1.515224 | -1.906869 |
| 12            | 6             | 0           | -2.096756               | 1.719793  | 1.802399  |
| 13            | 17            | 0           | -0.525107               | -2.113295 | 1.128077  |
| 14            | 6             | 0           | 3.882385                | -0.035197 | 0.348563  |
| 15            | 6             | 0           | 3.998755                | 1.455848  | -0.021973 |
| 16            | 6             | 0           | 4.647230                | -0.911992 | -0.651801 |
| 17            | 1             | 0           | 1.182947                | -0.512743 | 2.330018  |
| 18            | 1             | 0           | 1.775928                | 1.147664  | 1.844159  |
| 19            | 1             | 0           | -4.466984               | -1.246946 | -0.198027 |
| 20            | 1             | 0           | -4.669468               | -0.060779 | -1.511665 |
| 21            | 1             | 0           | -4.660292               | 0.645247  | 1.276465  |
| 22            | 1             | 0           | -4.276874               | 1.796339  | -0.026273 |
| 23            | 1             | 0           | 2.032819                | -1.884335 | -1.192410 |
| 24            | 1             | 0           | -2.443913               | -2.514111 | -1.496761 |
| 25            | 1             | 0           | -1.179898               | -1.424747 | -2.103945 |
| 26            | 1             | 0           | -2.792489               | -1.390345 | -2.849622 |
| 27            | 1             | 0           | -2.212344               | 2.762054  | 1.477943  |
| 28            | 1             | 0           | -1.038730               | 1.514899  | 1.964988  |
| 29            | 1             | 0           | -2.644082               | 1.571636  | 2.740043  |
| 30            | 1             | 0           | 4.342880                | -0.170840 | 1.339015  |
| 31            | 1             | 0           | 3.499548                | 2.101575  | 0.706337  |
| 32            | 1             | 0           | 3.547090                | 1.650955  | -0.999406 |
| 33            | 1             | 0           | 5.055615                | 1.745848  | -0.059620 |
| 34            | 1             | 0           | 4.263765                | -0.778457 | -1.670690 |
| 35            | 1             | 0           | 4.576646                | -1.974954 | -0.394970 |
| 36            | 1             | 0           | 5.707691                | -0.636994 | -0.659260 |

### 15c

Zero-point correction= 0.296649  
 (Hartree/Particle)  
 Thermal correction to Energy= 0.318595  
 Thermal correction to Enthalpy= 0.319540  
 Thermal correction to Gibbs Free Energy= 0.245046  
 Sum of electronic and zero-point Energies= -1554.671978  
 Sum of electronic and thermal Energies= -1554.650032  
 Sum of electronic and thermal Enthalpies= -1554.649087  
 Sum of electronic and thermal Free Energies= -1554.723581

| Center | Atomic | Atomic | Coordinates (Angstroms) |  |  |
|--------|--------|--------|-------------------------|--|--|
|--------|--------|--------|-------------------------|--|--|



| Number | Number | Type | X         | Y         | Z         |
|--------|--------|------|-----------|-----------|-----------|
| 1      | 17     | 0    | 0.738076  | 2.363264  | -1.237094 |
| 2      | 44     | 0    | -0.263173 | 0.238509  | -0.400868 |
| 3      | 6      | 0    | -0.210136 | -0.393821 | -2.102330 |
| 4      | 6      | 0    | 1.691754  | -0.131551 | 0.221925  |
| 5      | 6      | 0    | 3.896025  | -0.844156 | 0.485910  |
| 6      | 7      | 0    | 2.623689  | -0.972661 | -0.242713 |
| 7      | 7      | 0    | 2.175222  | 0.505643  | 1.302561  |
| 8      | 6      | 0    | 3.488033  | -0.010005 | 1.710030  |
| 9      | 6      | 0    | 2.528953  | -1.817908 | -1.419800 |
| 10     | 6      | 0    | 1.434624  | 1.405246  | 2.166425  |
| 11     | 17     | 0    | -0.588191 | -2.076564 | 0.438267  |
| 12     | 1      | 0    | -0.519164 | -1.418830 | -2.329611 |
| 13     | 1      | 0    | 0.040467  | 0.267986  | -2.936131 |
| 14     | 1      | 0    | 4.639338  | -0.330814 | -0.138768 |
| 15     | 1      | 0    | 4.288014  | -1.830182 | 0.752535  |
| 16     | 1      | 0    | 4.178030  | 0.813874  | 1.917170  |
| 17     | 1      | 0    | 3.390805  | -0.620266 | 2.618701  |
| 18     | 1      | 0    | 2.702641  | -1.249744 | -2.341974 |
| 19     | 1      | 0    | 1.547504  | -2.291621 | -1.447968 |
| 20     | 1      | 0    | 3.289775  | -2.600010 | -1.340991 |
| 21     | 1      | 0    | 0.975796  | 0.870860  | 3.009147  |
| 22     | 1      | 0    | 0.667381  | 1.916984  | 1.582207  |
| 23     | 1      | 0    | 2.116114  | 2.167433  | 2.558228  |
| 24     | 6      | 0    | -1.914750 | 1.575828  | -0.172802 |
| 25     | 6      | 0    | -2.378936 | 0.487990  | 0.235362  |
| 26     | 6      | 0    | -3.407931 | -0.456385 | 0.732308  |
| 27     | 6      | 0    | -4.452895 | 0.309489  | 1.567884  |
| 28     | 6      | 0    | -4.055752 | -1.207656 | -0.447554 |
| 29     | 1      | 0    | -1.860055 | 2.607298  | -0.463803 |
| 30     | 1      | 0    | -2.910776 | -1.199590 | 1.364014  |
| 31     | 1      | 0    | -4.979787 | 1.050716  | 0.956296  |
| 32     | 1      | 0    | -3.985744 | 0.831512  | 2.409684  |
| 33     | 1      | 0    | -5.193544 | -0.391977 | 1.968940  |
| 34     | 1      | 0    | -3.303056 | -1.773397 | -1.002839 |
| 35     | 1      | 0    | -4.553401 | -0.510216 | -1.131395 |
| 36     | 1      | 0    | -4.805100 | -1.911572 | -0.068271 |

### TS (15-16) c

Zero-point correction= 0.295509  
 (Hartree/Particle)  
 Thermal correction to Energy= 0.317290  
 Thermal correction to Enthalpy= 0.318234  
 Thermal correction to Gibbs Free Energy= 0.242462  
 Sum of electronic and zero-point Energies= -1554.655121  
 Sum of electronic and thermal Energies= -1554.633340  
 Sum of electronic and thermal Enthalpies= -1554.632396  
 Sum of electronic and thermal Free Energies= -1554.708168

| Center Number | Atomic Number | Atomic Type | Coordinates (Angstroms) |           |           |
|---------------|---------------|-------------|-------------------------|-----------|-----------|
|               |               |             | X                       | Y         | Z         |
| 1             | 17            | 0           | -0.110569               | -1.811602 | -1.728412 |
| 2             | 44            | 0           | -0.185776               | -0.425331 | 0.283167  |
| 3             | 6             | 0           | -0.163224               | -1.875370 | 1.413552  |
| 4             | 6             | 0           | 1.687557                | 0.246003  | -0.150616 |
| 5             | 6             | 0           | 3.303985                | 1.781361  | -0.837235 |

|    |    |   |           |           |           |
|----|----|---|-----------|-----------|-----------|
| 6  | 7  | 0 | 1.886613  | 1.398695  | -0.822239 |
| 7  | 7  | 0 | 2.884861  | -0.296622 | 0.141400  |
| 8  | 6  | 0 | 3.982145  | 0.451219  | -0.493246 |
| 9  | 6  | 0 | -2.349614 | -1.323459 | 0.873154  |
| 10 | 6  | 0 | -2.404745 | -0.329969 | 0.128127  |
| 11 | 6  | 0 | 0.859406  | 2.394901  | -1.071895 |
| 12 | 6  | 0 | 3.131647  | -1.657710 | 0.577572  |
| 13 | 6  | 0 | -3.060343 | 0.727296  | -0.688789 |
| 14 | 17 | 0 | -0.262787 | 1.187493  | 2.131212  |
| 15 | 6  | 0 | -4.137794 | 0.089983  | -1.588460 |
| 16 | 6  | 0 | -3.626408 | 1.829343  | 0.228394  |
| 17 | 1  | 0 | -0.192754 | -1.749052 | 2.501740  |
| 18 | 1  | 0 | -0.130112 | -2.900636 | 1.027256  |
| 19 | 1  | 0 | 3.495490  | 2.551249  | -0.075836 |
| 20 | 1  | 0 | 3.594683  | 2.175332  | -1.815596 |
| 21 | 1  | 0 | 4.827354  | 0.560879  | 0.192551  |
| 22 | 1  | 0 | 4.325826  | -0.081561 | -1.391600 |
| 23 | 1  | 0 | -2.646076 | -2.163938 | 1.463963  |
| 24 | 1  | 0 | 0.705710  | 3.046941  | -0.204061 |
| 25 | 1  | 0 | -0.084620 | 1.898206  | -1.309774 |
| 26 | 1  | 0 | 1.148652  | 2.991645  | -1.942752 |
| 27 | 1  | 0 | 3.271796  | -2.330872 | -0.278478 |
| 28 | 1  | 0 | 2.285702  | -2.008357 | 1.166343  |
| 29 | 1  | 0 | 4.030492  | -1.675483 | 1.202703  |
| 30 | 1  | 0 | -2.307390 | 1.180259  | -1.346373 |
| 31 | 1  | 0 | -4.925185 | -0.368945 | -0.980383 |
| 32 | 1  | 0 | -3.702729 | -0.679022 | -2.233189 |
| 33 | 1  | 0 | -4.595591 | 0.860700  | -2.219040 |
| 34 | 1  | 0 | -2.846531 | 2.235863  | 0.878584  |
| 35 | 1  | 0 | -4.424651 | 1.427418  | 0.861750  |
| 36 | 1  | 0 | -4.044864 | 2.637712  | -0.382231 |

## 16c

Zero-point correction= 0.300625  
 (Hartree/Particle)  
 Thermal correction to Energy= 0.321819  
 Thermal correction to Enthalpy= 0.322763  
 Thermal correction to Gibbs Free Energy= 0.249940  
 Sum of electronic and zero-point Energies= -1554.725532  
 Sum of electronic and thermal Energies= -1554.704338  
 Sum of electronic and thermal Enthalpies= -1554.703394  
 Sum of electronic and thermal Free Energies= -1554.776217

| Center<br>Number | Atomic<br>Number | Atomic<br>Type | Coordinates (Angstroms) |           |           |
|------------------|------------------|----------------|-------------------------|-----------|-----------|
|                  |                  |                | X                       | Y         | Z         |
| 1                | 17               | 0              | -0.291177               | -1.887449 | -1.885621 |
| 2                | 44               | 0              | -0.264909               | -0.805881 | 0.253650  |
| 3                | 6                | 0              | -3.142343               | -0.985813 | 1.325758  |
| 4                | 6                | 0              | 1.386390                | 0.253947  | -0.016495 |
| 5                | 6                | 0              | 2.983618                | 1.968656  | 0.120170  |
| 6                | 7                | 0              | 1.582726                | 1.565672  | 0.302763  |
| 7                | 7                | 0              | 2.546960                | -0.230059 | -0.513435 |
| 8                | 6                | 0              | 3.556169                | 0.814365  | -0.706697 |
| 9                | 6                | 0              | -2.876581               | -0.332119 | 0.176393  |
| 10               | 6                | 0              | -1.624544               | 0.374683  | -0.128549 |
| 11               | 6                | 0              | 0.803528                | 2.343877  | 1.252991  |
| 12               | 6                | 0              | 2.838004                | -1.571964 | -0.988103 |

|    |    |   |           |           |           |
|----|----|---|-----------|-----------|-----------|
| 13 | 6  | 0 | -1.659169 | 1.658641  | -0.927571 |
| 14 | 6  | 0 | -2.125995 | 1.370375  | -2.375273 |
| 15 | 6  | 0 | -2.556704 | 2.722953  | -0.262695 |
| 16 | 1  | 0 | -2.469159 | -0.949738 | 2.177239  |
| 17 | 1  | 0 | -4.062517 | -1.553472 | 1.436280  |
| 18 | 1  | 0 | 3.472647  | 2.057792  | 1.101210  |
| 19 | 1  | 0 | 3.051850  | 2.937040  | -0.385545 |
| 20 | 1  | 0 | 4.537024  | 0.477406  | -0.356001 |
| 21 | 1  | 0 | 3.640007  | 1.063709  | -1.773981 |
| 22 | 1  | 0 | -3.610100 | -0.374689 | -0.632161 |
| 23 | 1  | 0 | 1.363504  | 2.455905  | 2.190938  |
| 24 | 1  | 0 | -0.127008 | 1.829997  | 1.476340  |
| 25 | 1  | 0 | 0.596064  | 3.340399  | 0.845762  |
| 26 | 1  | 0 | 2.856585  | -1.613584 | -2.083065 |
| 27 | 1  | 0 | 2.083865  | -2.272236 | -0.636994 |
| 28 | 1  | 0 | 3.817574  | -1.872987 | -0.597844 |
| 29 | 1  | 0 | -0.637987 | 2.045234  | -0.991024 |
| 30 | 1  | 0 | -3.177714 | 1.064247  | -2.405143 |
| 31 | 1  | 0 | -1.525243 | 0.580419  | -2.834683 |
| 32 | 1  | 0 | -2.029299 | 2.283314  | -2.974504 |
| 33 | 1  | 0 | -2.226359 | 2.958991  | 0.754542  |
| 34 | 1  | 0 | -3.596583 | 2.382149  | -0.204880 |
| 35 | 1  | 0 | -2.538535 | 3.648722  | -0.849768 |
| 36 | 17 | 0 | 0.163843  | -0.823418 | 2.605493  |

### 13d

Zero-point correction= 0.268411  
(Hartree/Particle)  
Thermal correction to Energy= 0.289201  
Thermal correction to Enthalpy= 0.290145  
Thermal correction to Gibbs Free Energy= 0.218660  
Sum of electronic and zero-point Energies= -1515.396429  
Sum of electronic and thermal Energies= -1515.375640  
Sum of electronic and thermal Enthalpies= -1515.374695  
Sum of electronic and thermal Free Energies= -1515.446180

| Center<br>Number | Atomic<br>Number | Atomic<br>Type | Coordinates (Angstroms) |           |           |
|------------------|------------------|----------------|-------------------------|-----------|-----------|
|                  |                  |                | X                       | Y         | Z         |
| 1                | 17               | 0              | 0.278000                | -2.224748 | -1.061815 |
| 2                | 44               | 0              | 0.621385                | 0.107885  | -0.267608 |
| 3                | 6                | 0              | 0.649991                | 0.655344  | -2.002636 |
| 4                | 6                | 0              | -1.422551               | -0.086430 | 0.121400  |
| 5                | 6                | 0              | -3.254582               | -0.877749 | 1.325485  |
| 6                | 7                | 0              | -1.801584               | -0.670862 | 1.272891  |
| 7                | 7                | 0              | -2.514232               | 0.288691  | -0.560342 |
| 8                | 6                | 0              | -3.739684               | 0.075673  | 0.227641  |
| 9                | 17               | 0              | 0.097661                | 2.439405  | 0.419075  |
| 10               | 6                | 0              | -0.930110               | -1.426393 | 2.156064  |
| 11               | 6                | 0              | -2.570417               | 1.184621  | -1.698244 |
| 12               | 1                | 0              | 0.692896                | 1.720143  | -2.250732 |
| 13               | 1                | 0              | 0.728422                | -0.072915 | -2.815066 |
| 14               | 1                | 0              | -3.650060               | -0.634908 | 2.316184  |
| 15               | 1                | 0              | -3.491954               | -1.926834 | 1.098436  |
| 16               | 1                | 0              | -4.086439               | 1.035465  | 0.635703  |
| 17               | 1                | 0              | -4.533380               | -0.347786 | -0.394452 |
| 18               | 1                | 0              | -0.848940               | -2.472675 | 1.838233  |

|    |   |   |           |           |           |
|----|---|---|-----------|-----------|-----------|
| 19 | 1 | 0 | 0.069375  | -0.984738 | 2.162539  |
| 20 | 1 | 0 | -1.327949 | -1.375073 | 3.174672  |
| 21 | 1 | 0 | -1.634605 | 1.119965  | -2.250801 |
| 22 | 1 | 0 | -3.396548 | 0.882430  | -2.350397 |
| 23 | 1 | 0 | -2.718447 | 2.222049  | -1.373275 |
| 24 | 6 | 0 | 2.563354  | -0.649528 | 0.274731  |
| 25 | 6 | 0 | 2.519775  | 0.553600  | 0.643806  |
| 26 | 6 | 0 | 3.225469  | -1.951204 | 0.058294  |
| 27 | 6 | 0 | 3.089385  | 1.792873  | 1.208833  |
| 28 | 1 | 0 | 4.210992  | -1.946496 | 0.540654  |
| 29 | 1 | 0 | 3.351686  | -2.143310 | -1.011657 |
| 30 | 1 | 0 | 2.627568  | -2.775860 | 0.454032  |
| 31 | 1 | 0 | 2.459077  | 2.194878  | 2.005853  |
| 32 | 1 | 0 | 4.094057  | 1.590314  | 1.600651  |
| 33 | 1 | 0 | 3.154011  | 2.569616  | 0.440631  |

### TS (13-14) d

|                                              |              |
|----------------------------------------------|--------------|
| Zero-point correction=                       | 0.267515     |
| (Hartree/Particle)                           |              |
| Thermal correction to Energy=                | 0.288053     |
| Thermal correction to Enthalpy=              | 0.288998     |
| Thermal correction to Gibbs Free Energy=     | 0.216787     |
| Sum of electronic and zero-point Energies=   | -1515.379221 |
| Sum of electronic and thermal Energies=      | -1515.358683 |
| Sum of electronic and thermal Enthalpies=    | -1515.357739 |
| Sum of electronic and thermal Free Energies= | -1515.429949 |

| Center<br>Number | Atomic<br>Number | Atomic<br>Type | Coordinates (Angstroms) |           |           |
|------------------|------------------|----------------|-------------------------|-----------|-----------|
|                  |                  |                | X                       | Y         | Z         |
| 1                | 17               | 0              | 0.428796                | -1.671139 | 1.784249  |
| 2                | 44               | 0              | 0.480697                | -0.061079 | -0.052679 |
| 3                | 6                | 0              | 1.256754                | -1.254363 | -1.220952 |
| 4                | 6                | 0              | -1.565217               | -0.012382 | -0.031735 |
| 5                | 6                | 0              | -3.715747               | 0.724139  | 0.494813  |
| 6                | 7                | 0              | -2.287455               | 1.046347  | 0.385372  |
| 7                | 7                | 0              | -2.408731               | -1.001410 | -0.374296 |
| 8                | 6                | 0              | -3.809918               | -0.557796 | -0.343737 |
| 9                | 17               | 0              | 0.474310                | 1.702788  | -1.768320 |
| 10               | 6                | 0              | -1.748878               | 2.246177  | 0.997896  |
| 11               | 6                | 0              | -2.044318               | -2.277973 | -0.959643 |
| 12               | 1                | 0              | 1.503839                | -0.967049 | -2.248120 |
| 13               | 1                | 0              | 1.454931                | -2.290637 | -0.927156 |
| 14               | 1                | 0              | -4.328543               | 1.541720  | 0.103326  |
| 15               | 1                | 0              | -3.989670               | 0.553362  | 1.546027  |
| 16               | 1                | 0              | -4.171024               | -0.359981 | -1.363050 |
| 17               | 1                | 0              | -4.447727               | -1.322486 | 0.109353  |
| 18               | 1                | 0              | -1.670868               | 2.146438  | 2.089816  |
| 19               | 1                | 0              | -0.770574               | 2.458895  | 0.561825  |
| 20               | 1                | 0              | -2.406136               | 3.091176  | 0.768333  |
| 21               | 1                | 0              | -1.102493               | -2.612387 | -0.524642 |
| 22               | 1                | 0              | -2.820085               | -3.009520 | -0.712616 |
| 23               | 1                | 0              | -1.953657               | -2.214489 | -2.052687 |
| 24               | 6                | 0              | 2.900625                | -0.188088 | -0.096630 |
| 25               | 6                | 0              | 2.390563                | 0.747678  | 0.563174  |
| 26               | 6                | 0              | 4.002490                | -1.065778 | -0.541566 |
| 27               | 6                | 0              | 2.456402                | 1.952876  | 1.414923  |
| 28               | 1                | 0              | 4.946402                | -0.652186 | -0.166611 |

|    |   |   |          |           |           |
|----|---|---|----------|-----------|-----------|
| 29 | 1 | 0 | 4.067580 | -1.131986 | -1.632895 |
| 30 | 1 | 0 | 3.891289 | -2.077826 | -0.137551 |
| 31 | 1 | 0 | 1.880084 | 1.814058  | 2.336328  |
| 32 | 1 | 0 | 3.496820 | 2.166226  | 1.688346  |
| 33 | 1 | 0 | 2.053149 | 2.814608  | 0.872281  |

## 14d

Zero-point correction= 0.271352  
(Hartree/Particle)  
Thermal correction to Energy= 0.291414  
Thermal correction to Enthalpy= 0.292358  
Thermal correction to Gibbs Free Energy= 0.221783  
Sum of electronic and zero-point Energies= -1515.446870  
Sum of electronic and thermal Energies= -1515.426808  
Sum of electronic and thermal Enthalpies= -1515.425864  
Sum of electronic and thermal Free Energies= -1515.496440

| Center Number | Atomic Number | Atomic Type | Coordinates (Angstroms) |           |           |
|---------------|---------------|-------------|-------------------------|-----------|-----------|
|               |               |             | X                       | Y         | Z         |
| 1             | 17            | 0           | -0.481920               | -1.050138 | 2.251435  |
| 2             | 44            | 0           | -0.442369               | 0.414578  | 0.370545  |
| 3             | 6             | 0           | -3.382384               | 0.970918  | -0.152390 |
| 4             | 6             | 0           | 1.402924                | -0.175371 | -0.068894 |
| 5             | 6             | 0           | 3.242261                | -1.512578 | -0.654449 |
| 6             | 7             | 0           | 1.780144                | -1.374082 | -0.599825 |
| 7             | 7             | 0           | 2.520600                | 0.553429  | 0.143670  |
| 8             | 6             | 0           | 3.721333                | -0.079329 | -0.408405 |
| 9             | 17            | 0           | -0.258279               | 2.567066  | -0.688169 |
| 10            | 6             | 0           | 1.012531                | -2.609248 | -0.571558 |
| 11            | 6             | 0           | 2.630995                | 1.896055  | 0.687210  |
| 12            | 1             | 0           | -2.872739               | 1.894685  | -0.407789 |
| 13            | 1             | 0           | -4.362492               | 1.048795  | 0.312927  |
| 14            | 1             | 0           | 3.564106                | -1.915369 | -1.620067 |
| 15            | 1             | 0           | 3.577031                | -2.202465 | 0.133884  |
| 16            | 1             | 0           | 4.020303                | 0.428597  | -1.336173 |
| 17            | 1             | 0           | 4.554535                | -0.018015 | 0.299192  |
| 18            | 1             | 0           | 1.452769                | -3.302724 | 0.157335  |
| 19            | 1             | 0           | -0.008983               | -2.403331 | -0.264297 |
| 20            | 1             | 0           | 1.021208                | -3.087137 | -1.558396 |
| 21            | 1             | 0           | 1.703828                | 2.185043  | 1.177010  |
| 22            | 1             | 0           | 3.445911                | 1.908944  | 1.420967  |
| 23            | 1             | 0           | 2.840526                | 2.628500  | -0.100446 |
| 24            | 6             | 0           | -2.848670               | -0.238316 | -0.427693 |
| 25            | 6             | 0           | -1.462536               | -0.339524 | -0.943837 |
| 26            | 6             | 0           | -3.560904               | -1.537954 | -0.112743 |
| 27            | 6             | 0           | -1.163270               | -0.859291 | -2.310594 |
| 28            | 1             | 0           | -2.997725               | -2.110362 | 0.633690  |
| 29            | 1             | 0           | -3.662760               | -2.163433 | -1.008801 |
| 30            | 1             | 0           | -4.562104               | -1.345822 | 0.284419  |
| 31            | 1             | 0           | -0.092407               | -0.950594 | -2.496861 |
| 32            | 1             | 0           | -1.652794               | -1.826331 | -2.494934 |
| 33            | 1             | 0           | -1.579474               | -0.145783 | -3.037954 |

TS(11-17) a

Zero-point correction= 0.324159  
 (Hartree/Particle)  
 Thermal correction to Energy= 0.350183  
 Thermal correction to Enthalpy= 0.351127  
 Thermal correction to Gibbs Free Energy= 0.267772  
 Sum of electronic and zero-point Energies= -1897.783089  
 Sum of electronic and thermal Energies= -1897.757065  
 Sum of electronic and thermal Enthalpies= -1897.756121  
 Sum of electronic and thermal Free Energies= -1897.839476

| Center<br>Number | Atomic<br>Number | Atomic<br>Type | Coordinates (Angstroms) |           |           |
|------------------|------------------|----------------|-------------------------|-----------|-----------|
|                  |                  |                | X                       | Y         | Z         |
| 1                | 6                | 0              | -0.306969               | 2.883077  | 1.358146  |
| 2                | 6                | 0              | 0.045365                | 2.823035  | 2.512874  |
| 3                | 1                | 0              | -0.603482               | 2.913467  | 0.325744  |
| 4                | 1                | 0              | 0.348524                | 2.779293  | 3.534729  |
| 5                | 6                | 0              | -0.201832               | -0.787273 | 1.844736  |
| 6                | 17               | 0              | -0.336583               | -2.295568 | -0.839378 |
| 7                | 44               | 0              | -0.190321               | -0.114909 | 0.134239  |
| 8                | 15               | 0              | -2.632100               | -0.202434 | 0.046594  |
| 9                | 6                | 0              | -3.414754               | -1.441950 | 1.173403  |
| 10               | 6                | 0              | -3.518170               | 1.359576  | 0.476400  |
| 11               | 6                | 0              | -3.335691               | -0.658400 | -1.590641 |
| 12               | 6                | 0              | 1.982702                | -0.094829 | -0.036881 |
| 13               | 6                | 0              | 4.207460                | 0.591915  | -0.376165 |
| 14               | 7                | 0              | 2.774782                | 0.877262  | -0.539381 |
| 15               | 7                | 0              | 2.794305                | -1.101025 | 0.370841  |
| 16               | 6                | 0              | 4.198260                | -0.889219 | -0.008622 |
| 17               | 6                | 0              | 2.414335                | 2.242488  | -0.880105 |
| 18               | 6                | 0              | 2.451679                | -2.422646 | 0.860441  |
| 19               | 1                | 0              | -0.657151               | -1.736713 | 2.161414  |
| 20               | 1                | 0              | 0.202231                | -0.193541 | 2.679500  |
| 21               | 1                | 0              | -3.232501               | -1.170572 | 2.218147  |
| 22               | 1                | 0              | -4.495825               | -1.500759 | 1.005746  |
| 23               | 1                | 0              | -2.967787               | -2.422475 | 0.983235  |
| 24               | 1                | 0              | -3.229719               | 2.127846  | -0.245768 |
| 25               | 1                | 0              | -4.604319               | 1.217406  | 0.441724  |
| 26               | 1                | 0              | -3.229587               | 1.692774  | 1.478003  |
| 27               | 1                | 0              | -4.430710               | -0.670927 | -1.545363 |
| 28               | 1                | 0              | -2.994441               | 0.067297  | -2.331308 |
| 29               | 1                | 0              | -2.961320               | -1.645589 | -1.871158 |
| 30               | 1                | 0              | 4.623333                | 1.222284  | 0.423907  |
| 31               | 1                | 0              | 4.752470                | 0.810355  | -1.299597 |
| 32               | 1                | 0              | 4.867311                | -1.138086 | 0.821650  |
| 33               | 1                | 0              | 4.454880                | -1.535276 | -0.860459 |
| 34               | 1                | 0              | 2.620952                | 2.919273  | -0.038848 |
| 35               | 1                | 0              | 1.363880                | 2.290537  | -1.159063 |
| 36               | 1                | 0              | 3.015163                | 2.560157  | -1.739574 |
| 37               | 1                | 0              | 1.411616                | -2.453076 | 1.169946  |
| 38               | 1                | 0              | 3.102323                | -2.663464 | 1.710974  |
| 39               | 1                | 0              | 2.596002                | -3.178611 | 0.078689  |
| 40               | 17               | 0              | -0.734837               | 1.573958  | -1.829411 |

### TS (11-17) b

Zero-point correction= 0.353948  
 (Hartree/Particle)

Thermal correction to Energy= 0.381159  
 Thermal correction to Enthalpy= 0.382103  
 Thermal correction to Gibbs Free Energy= 0.296006  
 Sum of electronic and zero-point Energies= -1937.088771  
 Sum of electronic and thermal Energies= -1937.061560  
 Sum of electronic and thermal Enthalpies= -1937.060616  
 Sum of electronic and thermal Free Energies= -1937.146713

| Center<br>Number | Atomic<br>Number | Atomic<br>Type | Coordinates (Angstroms) |           |           |
|------------------|------------------|----------------|-------------------------|-----------|-----------|
|                  |                  |                | X                       | Y         | Z         |
| 1                | 6                | 0              | -0.442392               | 2.305662  | 1.476176  |
| 2                | 6                | 0              | -0.812280               | 3.234441  | 0.789016  |
| 3                | 6                | 0              | -1.251999               | 4.354070  | -0.037997 |
| 4                | 1                | 0              | -0.171858               | 1.491334  | 2.127524  |
| 5                | 1                | 0              | -0.467583               | 5.113616  | -0.136816 |
| 6                | 1                | 0              | -1.520984               | 4.016282  | -1.046986 |
| 7                | 1                | 0              | -2.135267               | 4.838386  | 0.394988  |
| 8                | 6                | 0              | -0.354560               | 0.938456  | -1.812830 |
| 9                | 17               | 0              | -0.068658               | -1.976835 | -1.683395 |
| 10               | 44               | 0              | -0.156059               | -0.027359 | -0.257065 |
| 11               | 15               | 0              | -2.525306               | -0.549076 | -0.020149 |
| 12               | 6                | 0              | -2.826663               | -2.291993 | 0.481999  |
| 13               | 6                | 0              | -3.462656               | 0.425631  | 1.234113  |
| 14               | 6                | 0              | -3.545933               | -0.386116 | -1.551788 |
| 15               | 1                | 0              | -0.442741               | 0.497815  | -2.814582 |
| 16               | 1                | 0              | -0.446587               | 2.035800  | -1.805334 |
| 17               | 1                | 0              | -2.373012               | -2.951802 | -0.261428 |
| 18               | 1                | 0              | -2.341116               | -2.463048 | 1.445286  |
| 19               | 1                | 0              | -3.902079               | -2.490445 | 0.556306  |
| 20               | 1                | 0              | -2.967335               | 0.298296  | 2.200516  |
| 21               | 1                | 0              | -3.448880               | 1.487822  | 0.974648  |
| 22               | 1                | 0              | -4.500407               | 0.080060  | 1.303449  |
| 23               | 1                | 0              | -3.577186               | 0.660941  | -1.869639 |
| 24               | 1                | 0              | -3.075981               | -0.976410 | -2.343875 |
| 25               | 1                | 0              | -4.569605               | -0.743255 | -1.391566 |
| 26               | 17               | 0              | -0.169893               | -0.901053 | 2.269789  |
| 27               | 6                | 0              | 1.959464                | -0.056153 | -0.057079 |
| 28               | 6                | 0              | 4.206553                | 0.606237  | -0.201492 |
| 29               | 7                | 0              | 2.792796                | 1.006385  | -0.215800 |
| 30               | 7                | 0              | 2.711779                | -1.123309 | 0.254781  |
| 31               | 6                | 0              | 4.127820                | -0.777346 | 0.441948  |
| 32               | 6                | 0              | 2.450206                | 2.281229  | -0.812248 |
| 33               | 6                | 0              | 2.285210                | -2.442516 | 0.696082  |
| 34               | 1                | 0              | 4.810218                | 1.318694  | 0.368983  |
| 35               | 1                | 0              | 4.598491                | 0.564340  | -1.229170 |
| 36               | 1                | 0              | 4.363893                | -0.754029 | 1.515507  |
| 37               | 1                | 0              | 4.774152                | -1.519049 | -0.037095 |
| 38               | 1                | 0              | 2.468725                | 2.237195  | -1.911505 |
| 39               | 1                | 0              | 1.463269                | 2.592701  | -0.476625 |
| 40               | 1                | 0              | 3.180151                | 3.028075  | -0.481767 |
| 41               | 1                | 0              | 1.234922                | -2.589322 | 0.471112  |
| 42               | 1                | 0              | 2.880716                | -3.196405 | 0.167720  |
| 43               | 1                | 0              | 2.439014                | -2.544712 | 1.776498  |

### TS (11-19) b

Zero-point correction= 0.353118  
 (Hartree/Particle)

Thermal correction to Energy= 0.380798  
 Thermal correction to Enthalpy= 0.381742  
 Thermal correction to Gibbs Free Energy= 0.293951  
 Sum of electronic and zero-point Energies= -1937.080153  
 Sum of electronic and thermal Energies= -1937.052474  
 Sum of electronic and thermal Enthalpies= -1937.051529  
 Sum of electronic and thermal Free Energies= -1937.139320

| Center<br>Number | Atomic<br>Number | Atomic<br>Type | Coordinates (Angstroms) |           |           |
|------------------|------------------|----------------|-------------------------|-----------|-----------|
|                  |                  |                | X                       | Y         | Z         |
| 1                | 6                | 0              | 0.490622                | 3.254266  | 1.343580  |
| 2                | 6                | 0              | 0.059505                | 2.543302  | 2.223305  |
| 3                | 6                | 0              | 1.004042                | 4.096872  | 0.268667  |
| 4                | 1                | 0              | -0.315282               | 1.975354  | 3.042985  |
| 5                | 1                | 0              | 1.090254                | 3.510745  | -0.655412 |
| 6                | 1                | 0              | 1.992820                | 4.497887  | 0.521174  |
| 7                | 1                | 0              | 0.335470                | 4.945525  | 0.081118  |
| 8                | 6                | 0              | -2.654601               | -2.404769 | 0.917890  |
| 9                | 6                | 0              | 0.037086                | -0.950670 | 1.824822  |
| 10               | 17               | 0              | 0.243303                | -2.560288 | -0.797373 |
| 11               | 44               | 0              | 0.134378                | -0.335649 | 0.089913  |
| 12               | 15               | 0              | 2.566474                | -0.521019 | 0.095565  |
| 13               | 6                | 0              | 3.268629                | -1.735542 | 1.299887  |
| 14               | 6                | 0              | 3.472815                | 1.035399  | 0.500863  |
| 15               | 6                | 0              | 3.323242                | -1.054996 | -1.493791 |
| 16               | 6                | 0              | -2.030116               | -0.167535 | -0.070953 |
| 17               | 6                | 0              | -4.195787               | 0.675984  | -0.456611 |
| 18               | 7                | 0              | -2.746511               | 0.917892  | -0.429467 |
| 19               | 7                | 0              | -2.915404               | -1.143199 | 0.250012  |
| 20               | 6                | 0              | -4.309828               | -0.679637 | 0.239587  |
| 21               | 6                | 0              | -2.280715               | 2.197579  | -0.928730 |
| 22               | 1                | 0              | -3.353128               | -3.157890 | 0.535701  |
| 23               | 1                | 0              | -1.641870               | -2.737523 | 0.708647  |
| 24               | 1                | 0              | -2.811084               | -2.311267 | 2.003963  |
| 25               | 1                | 0              | 0.495413                | -1.876311 | 2.200955  |
| 26               | 1                | 0              | -0.467987               | -0.374163 | 2.616561  |
| 27               | 1                | 0              | 3.044125                | -1.423612 | 2.324816  |
| 28               | 1                | 0              | 4.354647                | -1.823707 | 1.186127  |
| 29               | 1                | 0              | 2.808464                | -2.712401 | 1.122908  |
| 30               | 1                | 0              | 3.221592                | 1.780929  | -0.257948 |
| 31               | 1                | 0              | 4.556719                | 0.873092  | 0.509544  |
| 32               | 1                | 0              | 3.153315                | 1.411445  | 1.477482  |
| 33               | 1                | 0              | 4.414015                | -1.109102 | -1.401682 |
| 34               | 1                | 0              | 3.042439                | -0.340260 | -2.269848 |
| 35               | 1                | 0              | 2.921285                | -2.034690 | -1.762503 |
| 36               | 1                | 0              | -4.731894               | 1.478841  | 0.060687  |
| 37               | 1                | 0              | -4.545815               | 0.648471  | -1.497782 |
| 38               | 1                | 0              | -4.683806               | -0.593351 | 1.270921  |
| 39               | 1                | 0              | -4.950530               | -1.389534 | -0.293361 |
| 40               | 1                | 0              | -1.196764               | 2.199554  | -0.996116 |
| 41               | 1                | 0              | -2.628240               | 3.001621  | -0.267289 |
| 42               | 1                | 0              | -2.684307               | 2.371209  | -1.934885 |
| 43               | 17               | 0              | 0.738723                | 1.177263  | -1.936235 |

### TS (11-17) c

Zero-point correction=  
 (Hartree/Particle)

0.411489



Thermal correction to Energy= 0.441021  
 Thermal correction to Enthalpy= 0.441965  
 Thermal correction to Gibbs Free Energy= 0.350711  
 Sum of electronic and zero-point Energies= -2015.657578  
 Sum of electronic and thermal Energies= -2015.628047  
 Sum of electronic and thermal Enthalpies= -2015.627102  
 Sum of electronic and thermal Free Energies= -2015.718357

| Center<br>Number | Atomic<br>Number | Atomic<br>Type | Coordinates (Angstroms) |           |           |
|------------------|------------------|----------------|-------------------------|-----------|-----------|
|                  |                  |                | X                       | Y         | Z         |
| 1                | 6                | 0              | -1.149395               | 1.392173  | 1.441607  |
| 2                | 6                | 0              | -2.005770               | 1.889434  | 0.736052  |
| 3                | 6                | 0              | -3.050876               | 2.514652  | -0.085357 |
| 4                | 6                | 0              | -2.808655               | 4.029744  | -0.252492 |
| 5                | 6                | 0              | -4.452207               | 2.237018  | 0.500348  |
| 6                | 1                | 0              | -0.479143               | 0.926966  | 2.143140  |
| 7                | 1                | 0              | -3.005838               | 2.052308  | -1.083253 |
| 8                | 1                | 0              | -1.832779               | 4.232247  | -0.704466 |
| 9                | 1                | 0              | -2.845789               | 4.535949  | 0.718116  |
| 10               | 1                | 0              | -3.582075               | 4.463139  | -0.896120 |
| 11               | 1                | 0              | -4.547135               | 2.673813  | 1.500167  |
| 12               | 1                | 0              | -4.646969               | 1.163206  | 0.578939  |
| 13               | 1                | 0              | -5.220054               | 2.680413  | -0.143191 |
| 14               | 6                | 0              | -0.436035               | 0.409213  | -1.857223 |
| 15               | 17               | 0              | 1.305254                | -1.939003 | -1.654402 |
| 16               | 44               | 0              | 0.152876                | -0.317537 | -0.267218 |
| 17               | 15               | 0              | -1.594047               | -2.013687 | -0.075983 |
| 18               | 6                | 0              | -0.948215               | -3.688899 | 0.321223  |
| 19               | 6                | 0              | -2.866250               | -1.738121 | 1.230033  |
| 20               | 6                | 0              | -2.592478               | -2.317146 | -1.601885 |
| 21               | 6                | 0              | 1.971672                | 0.767928  | -0.020395 |
| 22               | 6                | 0              | 3.543088                | 2.510212  | -0.140395 |
| 23               | 7                | 0              | 2.129266                | 2.112085  | -0.174542 |
| 24               | 7                | 0              | 3.167178                | 0.255635  | 0.312890  |
| 25               | 6                | 0              | 4.187984                | 1.292952  | 0.517542  |
| 26               | 6                | 0              | 1.192007                | 3.014087  | -0.810277 |
| 27               | 6                | 0              | 3.505926                | -1.094332 | 0.738843  |
| 28               | 1                | 0              | -0.207208               | -0.014334 | -2.843945 |
| 29               | 1                | 0              | -1.086367               | 1.296632  | -1.907090 |
| 30               | 1                | 0              | -0.248462               | -3.990845 | -0.461189 |
| 31               | 1                | 0              | -0.409100               | -3.632635 | 1.269446  |
| 32               | 1                | 0              | -1.771275               | -4.409426 | 0.392136  |
| 33               | 1                | 0              | -2.345309               | -1.627661 | 2.184901  |
| 34               | 1                | 0              | -3.421896               | -0.818465 | 1.029433  |
| 35               | 1                | 0              | -3.563818               | -2.581706 | 1.282940  |
| 36               | 1                | 0              | -3.140047               | -1.409810 | -1.876192 |
| 37               | 1                | 0              | -1.907523               | -2.568032 | -2.417289 |
| 38               | 1                | 0              | -3.303778               | -3.138938 | -1.461271 |
| 39               | 1                | 0              | 3.676823                | 3.436094  | 0.427329  |
| 40               | 1                | 0              | 3.914160                | 2.674328  | -1.163750 |
| 41               | 1                | 0              | 4.356540                | 1.438552  | 1.594242  |
| 42               | 1                | 0              | 5.136002                | 0.998449  | 0.057372  |
| 43               | 1                | 0              | 1.271070                | 2.981401  | -1.907451 |
| 44               | 1                | 0              | 0.178431                | 2.760352  | -0.510627 |
| 45               | 1                | 0              | 1.408455                | 4.034987  | -0.476973 |
| 46               | 1                | 0              | 2.702947                | -1.778350 | 0.490414  |
| 47               | 1                | 0              | 4.421403                | -1.400737 | 0.218808  |
| 48               | 1                | 0              | 3.675063                | -1.114457 | 1.821470  |
| 49               | 17               | 0              | 0.599920                | -1.212412 | 2.228938  |

-----

## TS (11-19) c

Zero-point correction= 0.411247  
 (Hartree/Particle)  
 Thermal correction to Energy= 0.441046  
 Thermal correction to Enthalpy= 0.441990  
 Thermal correction to Gibbs Free Energy= 0.350477  
 Sum of electronic and zero-point Energies= -2015.656938  
 Sum of electronic and thermal Energies= -2015.627139  
 Sum of electronic and thermal Enthalpies= -2015.626195  
 Sum of electronic and thermal Free Energies= -2015.717708

-----

| Center<br>Number | Atomic<br>Number | Atomic<br>Type | Coordinates (Angstroms) |           |           |
|------------------|------------------|----------------|-------------------------|-----------|-----------|
|                  |                  |                | X                       | Y         | Z         |
| 1                | 6                | 0              | 1.057798                | 2.772914  | -0.712458 |
| 2                | 6                | 0              | 0.349717                | 2.523545  | -1.664686 |
| 3                | 6                | 0              | 1.897634                | 3.103991  | 0.443551  |
| 4                | 6                | 0              | 1.826200                | 4.614040  | 0.751868  |
| 5                | 6                | 0              | 3.351044                | 2.633045  | 0.235271  |
| 6                | 1                | 0              | -0.259310               | 2.380475  | -2.526927 |
| 7                | 1                | 0              | 1.475637                | 2.549437  | 1.293217  |
| 8                | 1                | 0              | 0.793993                | 4.931798  | 0.929328  |
| 9                | 1                | 0              | 2.230241                | 5.207169  | -0.076774 |
| 10               | 1                | 0              | 2.412201                | 4.836247  | 1.650600  |
| 11               | 1                | 0              | 3.812097                | 3.135578  | -0.623278 |
| 12               | 1                | 0              | 3.389585                | 1.551937  | 0.068975  |
| 13               | 1                | 0              | 3.945162                | 2.863797  | 1.126604  |
| 14               | 6                | 0              | -0.738307               | -0.630767 | -2.185031 |
| 15               | 17               | 0              | -1.619407               | -2.553121 | -0.172107 |
| 16               | 44               | 0              | -0.511768               | -0.415721 | -0.366602 |
| 17               | 15               | 0              | -2.713356               | 0.548637  | 0.031475  |
| 18               | 6                | 0              | -3.502581               | -0.105815 | 1.558757  |
| 19               | 6                | 0              | -2.781535               | 2.376591  | 0.266148  |
| 20               | 6                | 0              | -3.994154               | 0.223287  | -1.259750 |
| 21               | 6                | 0              | 1.381316                | -1.328510 | -0.091379 |
| 22               | 6                | 0              | 3.565071                | -2.069343 | -0.520898 |
| 23               | 7                | 0              | 2.483820                | -1.133866 | -0.863990 |
| 24               | 7                | 0              | 1.709894                | -2.191068 | 0.883070  |
| 25               | 6                | 0              | 3.139738                | -2.529861 | 0.872861  |
| 26               | 6                | 0              | 2.505876                | -0.502967 | -2.169847 |
| 27               | 6                | 0              | 0.941370                | -2.548607 | 2.065786  |
| 28               | 1                | 0              | -1.288702               | -1.458671 | -2.651771 |
| 29               | 1                | 0              | -0.355788               | 0.101218  | -2.913480 |
| 30               | 1                | 0              | -3.589491               | -1.191551 | 1.470029  |
| 31               | 1                | 0              | -2.856564               | 0.127285  | 2.408240  |
| 32               | 1                | 0              | -4.493835               | 0.339326  | 1.702666  |
| 33               | 1                | 0              | -2.094510               | 2.636307  | 1.075754  |
| 34               | 1                | 0              | -2.454467               | 2.889815  | -0.642540 |
| 35               | 1                | 0              | -3.796926               | 2.700682  | 0.521383  |
| 36               | 1                | 0              | -3.708986               | 0.707594  | -2.199074 |
| 37               | 1                | 0              | -4.048569               | -0.856313 | -1.427597 |
| 38               | 1                | 0              | -4.978125               | 0.593304  | -0.950048 |
| 39               | 1                | 0              | 4.537698                | -1.568579 | -0.537117 |
| 40               | 1                | 0              | 3.590273                | -2.900616 | -1.241748 |
| 41               | 1                | 0              | 3.657193                | -1.978078 | 1.671020  |
| 42               | 1                | 0              | 3.285891                | -3.600805 | 1.042556  |
| 43               | 1                | 0              | 2.149909                | -1.181086 | -2.959114 |

|    |    |   |           |           |           |
|----|----|---|-----------|-----------|-----------|
| 44 | 1  | 0 | 1.893449  | 0.397634  | -2.158252 |
| 45 | 1  | 0 | 3.537036  | -0.213884 | -2.398111 |
| 46 | 1  | 0 | -0.104882 | -2.304188 | 1.914693  |
| 47 | 1  | 0 | 1.041845  | -3.627092 | 2.234207  |
| 48 | 1  | 0 | 1.316762  | -2.003627 | 2.939593  |
| 49 | 17 | 0 | -0.096582 | 0.616788  | 2.009791  |

## 17a

Zero-point correction= 0.327049  
(Hartree/Particle)  
Thermal correction to Energy= 0.352157  
Thermal correction to Enthalpy= 0.353101  
Thermal correction to Gibbs Free Energy= 0.273574  
Sum of electronic and zero-point Energies= -1897.796038  
Sum of electronic and thermal Energies= -1897.770930  
Sum of electronic and thermal Enthalpies= -1897.769986  
Sum of electronic and thermal Free Energies= -1897.849512

| Center<br>Number | Atomic<br>Number | Atomic<br>Type | Coordinates (Angstroms) |           |           |
|------------------|------------------|----------------|-------------------------|-----------|-----------|
|                  |                  |                | X                       | Y         | Z         |
| 1                | 44               | 0              | -0.193389               | -0.039683 | 0.384018  |
| 2                | 15               | 0              | -2.630663               | -0.137832 | -0.071212 |
| 3                | 6                | 0              | -3.466922               | -1.635046 | 0.622806  |
| 4                | 6                | 0              | -3.691464               | 1.236490  | 0.562436  |
| 5                | 6                | 0              | -3.116710               | -0.211091 | -1.843562 |
| 6                | 17               | 0              | -0.201426               | -1.797161 | -1.361362 |
| 7                | 6                | 0              | -0.368423               | -1.365911 | 1.667186  |
| 8                | 6                | 0              | 1.948333                | -0.019777 | 0.095145  |
| 9                | 6                | 0              | 4.094266                | -0.834746 | -0.388610 |
| 10               | 7                | 0              | 2.758206                | -1.102405 | 0.162788  |
| 11               | 7                | 0              | 2.705925                | 1.036599  | -0.263726 |
| 12               | 6                | 0              | 4.124825                | 0.690910  | -0.428567 |
| 13               | 6                | 0              | 2.421567                | -2.494222 | 0.391087  |
| 14               | 6                | 0              | 2.389717                | 2.454560  | -0.214536 |
| 15               | 1                | 0              | -1.644407               | -1.644407 | 1.714755  |
| 16               | 1                | 0              | -4.525012               | -1.661888 | 0.339692  |
| 17               | 1                | 0              | -2.968924               | -2.524607 | 0.226256  |
| 18               | 1                | 0              | -3.307613               | 2.181798  | 0.167755  |
| 19               | 1                | 0              | -4.724406               | 1.102664  | 0.223810  |
| 20               | 1                | 0              | -3.686734               | 1.263856  | 1.656857  |
| 21               | 1                | 0              | -4.207398               | -0.295824 | -1.916887 |
| 22               | 1                | 0              | -2.765130               | 0.694954  | -2.339184 |
| 23               | 1                | 0              | -2.634863               | -1.071710 | -2.309305 |
| 24               | 1                | 0              | -0.635093               | -2.400698 | 1.414701  |
| 25               | 1                | 0              | -0.326173               | -1.177658 | 2.750691  |
| 26               | 1                | 0              | 4.175813                | -1.281223 | -1.389356 |
| 27               | 1                | 0              | 4.871350                | -1.271559 | 0.246909  |
| 28               | 1                | 0              | 4.512511                | 1.095248  | -1.368579 |
| 29               | 1                | 0              | 4.709406                | 1.124396  | 0.396532  |
| 30               | 1                | 0              | 1.493505                | -2.564074 | 0.951045  |
| 31               | 1                | 0              | 3.231384                | -2.951996 | 0.972403  |
| 32               | 1                | 0              | 2.294551                | -3.034218 | -0.552792 |
| 33               | 1                | 0              | 2.927073                | 2.923598  | 0.623601  |
| 34               | 1                | 0              | 1.317947                | 2.601752  | -0.122437 |
| 35               | 1                | 0              | 2.716503                | 2.928481  | -1.146277 |
| 36               | 6                | 0              | -0.702226               | 1.614409  | 1.801704  |

|    |    |   |           |          |           |
|----|----|---|-----------|----------|-----------|
| 37 | 6  | 0 | 0.452687  | 1.274852 | 2.090802  |
| 38 | 1  | 0 | -1.607542 | 2.183191 | 1.810888  |
| 39 | 1  | 0 | 1.411821  | 1.246578 | 2.564182  |
| 40 | 17 | 0 | -0.603153 | 1.946865 | -1.354675 |

### TS (17-18) a

Zero-point correction= 0.325690  
(Hartree/Particle)  
Thermal correction to Energy= 0.350481  
Thermal correction to Enthalpy= 0.351425  
Thermal correction to Gibbs Free Energy= 0.272509  
Sum of electronic and zero-point Energies= -1897.782748  
Sum of electronic and thermal Energies= -1897.757957  
Sum of electronic and thermal Enthalpies= -1897.757013  
Sum of electronic and thermal Free Energies= -1897.835929

| Center<br>Number | Atomic<br>Number | Atomic<br>Type | Coordinates (Angstroms) |           |           |
|------------------|------------------|----------------|-------------------------|-----------|-----------|
|                  |                  |                | X                       | Y         | Z         |
| 1                | 44               | 0              | -0.185801               | -0.066828 | 0.202724  |
| 2                | 15               | 0              | -2.649727               | -0.192567 | 0.138568  |
| 3                | 6                | 0              | -3.467742               | -1.519871 | 1.146108  |
| 4                | 6                | 0              | -3.558492               | 1.318914  | 0.697077  |
| 5                | 6                | 0              | -3.371491               | -0.481606 | -1.529852 |
| 6                | 17               | 0              | -0.183922               | -1.567076 | -1.694544 |
| 7                | 6                | 0              | -0.310044               | 1.789728  | 1.452978  |
| 8                | 6                | 0              | -0.120796               | 1.010415  | 2.396403  |
| 9                | 6                | 0              | -0.046776               | -1.250714 | 1.669315  |
| 10               | 6                | 0              | 1.939707                | -0.030226 | 0.071037  |
| 11               | 6                | 0              | 4.163723                | -0.802703 | -0.044983 |
| 12               | 7                | 0              | 2.748162                | -1.117462 | 0.196601  |
| 13               | 7                | 0              | 2.743926                | 1.041433  | -0.098677 |
| 14               | 6                | 0              | 4.171429                | 0.722623  | 0.029139  |
| 15               | 6                | 0              | 2.393841                | -2.525616 | 0.128562  |
| 16               | 6                | 0              | 2.368036                | 2.441417  | -0.178049 |
| 17               | 1                | 0              | -3.267598               | -1.375140 | 2.213522  |
| 18               | 1                | 0              | -4.552996               | -1.518303 | 0.995414  |
| 19               | 1                | 0              | -3.073261               | -2.497174 | 0.849056  |
| 20               | 1                | 0              | -3.235602               | 2.155968  | 0.071293  |
| 21               | 1                | 0              | -4.642305               | 1.190017  | 0.599864  |
| 22               | 1                | 0              | -3.318946               | 1.546206  | 1.740680  |
| 23               | 1                | 0              | -4.466235               | -0.444377 | -1.488613 |
| 24               | 1                | 0              | -2.987907               | 0.289775  | -2.201815 |
| 25               | 1                | 0              | -3.040382               | -1.451600 | -1.906446 |
| 26               | 1                | 0              | -0.499823               | 2.699860  | 0.920670  |
| 27               | 1                | 0              | 0.050289                | 0.600766  | 3.369368  |
| 28               | 1                | 0              | -0.905332               | -1.734120 | 2.153661  |
| 29               | 1                | 0              | 0.889359                | -1.478202 | 2.197179  |
| 30               | 1                | 0              | 4.461286                | -1.174876 | -1.036033 |
| 31               | 1                | 0              | 4.804401                | -1.279381 | 0.704437  |
| 32               | 1                | 0              | 4.747300                | 1.194361  | -0.773297 |
| 33               | 1                | 0              | 4.556509                | 1.095331  | 0.990081  |
| 34               | 1                | 0              | 1.315218                | -2.649062 | 0.145577  |
| 35               | 1                | 0              | 2.856756                | -3.064180 | 0.966095  |
| 36               | 1                | 0              | 2.762461                | -2.958190 | -0.810665 |
| 37               | 1                | 0              | 2.438511                | 2.931451  | 0.803938  |
| 38               | 1                | 0              | 1.361607                | 2.527746  | -0.587693 |
| 39               | 1                | 0              | 3.058215                | 2.946741  | -0.862881 |

40            17            0            -0.686864    1.847863    -1.585670

---

## 18a

Zero-point correction= 0.330956  
 (Hartree/Particle)  
 Thermal correction to Energy= 0.355291  
 Thermal correction to Enthalpy= 0.356235  
 Thermal correction to Gibbs Free Energy= 0.277769  
 Sum of electronic and zero-point Energies= -1897.844175  
 Sum of electronic and thermal Energies= -1897.819841  
 Sum of electronic and thermal Enthalpies= -1897.818897  
 Sum of electronic and thermal Free Energies= -1897.897362

---

| Center<br>Number | Atomic<br>Number | Atomic<br>Type | Coordinates (Angstroms) |           |           |
|------------------|------------------|----------------|-------------------------|-----------|-----------|
|                  |                  |                | X                       | Y         | Z         |
| 1                | 44               | 0              | 0.211414                | -0.114298 | 0.278755  |
| 2                | 15               | 0              | 2.615044                | 0.068523  | -0.100025 |
| 3                | 6                | 0              | 3.333811                | 1.646561  | 0.528067  |
| 4                | 6                | 0              | 3.616851                | -1.238285 | 0.746057  |
| 5                | 6                | 0              | 3.217731                | -0.038669 | -1.830329 |
| 6                | 17               | 0              | 0.399568                | 1.767561  | -1.516846 |
| 7                | 6                | 0              | 0.259857                | -1.227485 | 1.760066  |
| 8                | 6                | 0              | 0.562284                | -0.037727 | 2.514114  |
| 9                | 6                | 0              | -0.241805               | 1.085947  | 2.392414  |
| 10               | 6                | 0              | -1.924327               | 0.006238  | 0.019106  |
| 11               | 6                | 0              | -4.058873               | 0.852584  | -0.452379 |
| 12               | 7                | 0              | -2.677258               | 1.126546  | -0.032515 |
| 13               | 7                | 0              | -2.748219               | -1.050859 | -0.150962 |
| 14               | 6                | 0              | -4.161013               | -0.656919 | -0.239972 |
| 15               | 6                | 0              | -2.260294               | 2.517122  | 0.014966  |
| 16               | 6                | 0              | -2.468120               | -2.447933 | 0.128195  |
| 17               | 1                | 0              | 3.183842                | 1.729252  | 1.609501  |
| 18               | 1                | 0              | 4.406581                | 1.707568  | 0.313291  |
| 19               | 1                | 0              | 2.809417                | 2.468872  | 0.034203  |
| 20               | 1                | 0              | 3.285365                | -2.213501 | 0.377026  |
| 21               | 1                | 0              | 4.685827                | -1.118521 | 0.537618  |
| 22               | 1                | 0              | 3.463723                | -1.203983 | 1.829530  |
| 23               | 1                | 0              | 4.307395                | 0.079114  | -1.851001 |
| 24               | 1                | 0              | 2.929857                | -1.007562 | -2.242579 |
| 25               | 1                | 0              | 2.732818                | 0.744475  | -2.414986 |
| 26               | 1                | 0              | 0.387584                | -2.276794 | 2.031973  |
| 27               | 1                | 0              | 1.565566                | 0.079887  | 2.935769  |
| 28               | 1                | 0              | 0.155602                | 2.060732  | 2.660774  |
| 29               | 1                | 0              | -1.316553               | 1.003870  | 2.306896  |
| 30               | 1                | 0              | -4.187248               | 1.137379  | -1.505792 |
| 31               | 1                | 0              | -4.769664               | 1.428521  | 0.148928  |
| 32               | 1                | 0              | -4.658257               | -1.179833 | -1.062444 |
| 33               | 1                | 0              | -4.680811               | -0.915227 | 0.695152  |
| 34               | 1                | 0              | -1.242668               | 2.590508  | 0.385595  |
| 35               | 1                | 0              | -2.950612               | 3.062877  | 0.671972  |
| 36               | 1                | 0              | -2.280641               | 2.963916  | -0.984673 |
| 37               | 1                | 0              | -2.795671               | -2.710264 | 1.146172  |
| 38               | 1                | 0              | -1.407140               | -2.644533 | 0.000322  |
| 39               | 1                | 0              | -3.021578               | -3.069230 | -0.584017 |
| 40               | 17               | 0              | 0.399909                | -1.886071 | -1.424422 |

---

## 17b

```

Zero-point correction=                0.355672
(Hartree/Particle)
Thermal correction to Energy=         0.382554
Thermal correction to Enthalpy=       0.383498
Thermal correction to Gibbs Free Energy= 0.299600
Sum of electronic and zero-point Energies= -1937.090832
Sum of electronic and thermal Energies= -1937.063950
Sum of electronic and thermal Enthalpies= -1937.063006
Sum of electronic and thermal Free Energies= -1937.146904
  
```

| Center<br>Number | Atomic<br>Number | Atomic<br>Type | Coordinates (Angstroms) |           |           |
|------------------|------------------|----------------|-------------------------|-----------|-----------|
|                  |                  |                | X                       | Y         | Z         |
| 1                | 44               | 0              | 0.243802                | 0.014541  | 0.277745  |
| 2                | 15               | 0              | 2.708917                | 0.104603  | -0.004934 |
| 3                | 6                | 0              | 3.585646                | 1.242671  | 1.162442  |
| 4                | 6                | 0              | 3.662151                | -1.465935 | 0.195329  |
| 5                | 6                | 0              | 3.296953                | 0.710420  | -1.639014 |
| 6                | 17               | 0              | 0.365423                | 2.169906  | -0.932990 |
| 7                | 6                | 0              | 0.427514                | 0.957248  | 1.863898  |
| 8                | 6                | 0              | -1.874831               | 0.119490  | -0.089415 |
| 9                | 6                | 0              | -3.967663               | 1.109500  | -0.473991 |
| 10               | 7                | 0              | -2.672663               | 1.170079  | 0.219072  |
| 11               | 7                | 0              | -2.624080               | -0.775911 | -0.765397 |
| 12               | 6                | 0              | -4.019360               | -0.346525 | -0.932029 |
| 13               | 6                | 0              | -2.327279               | 2.437923  | 0.833686  |
| 14               | 6                | 0              | -2.333743               | -2.166779 | -1.067594 |
| 15               | 1                | 0              | 3.447787                | 0.909983  | 2.196284  |
| 16               | 1                | 0              | 4.658043                | 1.285147  | 0.941262  |
| 17               | 1                | 0              | 3.161655                | 2.245625  | 1.057013  |
| 18               | 1                | 0              | 3.277892                | -2.198991 | -0.520008 |
| 19               | 1                | 0              | 4.723750                | -1.290631 | -0.009582 |
| 20               | 1                | 0              | 3.562186                | -1.857373 | 1.212569  |
| 21               | 1                | 0              | 4.393202                | 0.706976  | -1.657903 |
| 22               | 1                | 0              | 2.894377                | 0.058284  | -2.415702 |
| 23               | 1                | 0              | 2.915085                | 1.719232  | -1.802167 |
| 24               | 1                | 0              | 0.698255                | 2.021177  | 1.879711  |
| 25               | 1                | 0              | 0.410367                | 0.503209  | 2.867290  |
| 26               | 1                | 0              | -3.967070               | 1.812937  | -1.318094 |
| 27               | 1                | 0              | -4.784014               | 1.384832  | 0.201806  |
| 28               | 1                | 0              | -4.336516               | -0.465729 | -1.972610 |
| 29               | 1                | 0              | -4.676391               | -0.965365 | -0.302575 |
| 30               | 1                | 0              | -2.095766               | 3.197972  | 0.080726  |
| 31               | 1                | 0              | -1.456734               | 2.315785  | 1.472938  |
| 32               | 1                | 0              | -3.179208               | 2.765683  | 1.442151  |
| 33               | 1                | 0              | -2.971078               | -2.816685 | -0.448247 |
| 34               | 1                | 0              | -1.283431               | -2.378435 | -0.898042 |
| 35               | 1                | 0              | -2.551427               | -2.365600 | -2.122094 |
| 36               | 6                | 0              | 0.586665                | -2.038986 | 1.119302  |
| 37               | 6                | 0              | -0.447563               | -1.714158 | 1.713128  |
| 38               | 6                | 0              | -1.632827               | -1.689785 | 2.579068  |
| 39               | 1                | 0              | 1.381279                | -2.665263 | 0.773643  |
| 40               | 1                | 0              | -1.660949               | -0.785433 | 3.195909  |
| 41               | 1                | 0              | -1.626738               | -2.559941 | 3.246600  |
| 42               | 1                | 0              | -2.555452               | -1.716537 | 1.989051  |
| 43               | 17               | 0              | 0.670053                | -1.391047 | -1.949438 |

## TS (17-18)b

```

Zero-point correction= 0.355215
(Hartree/Particle)
Thermal correction to Energy= 0.381287
Thermal correction to Enthalpy= 0.382231
Thermal correction to Gibbs Free Energy= 0.299918
Sum of electronic and zero-point Energies= -1937.075507
Sum of electronic and thermal Energies= -1937.049435
Sum of electronic and thermal Enthalpies= -1937.048491
Sum of electronic and thermal Free Energies= -1937.130804
  
```

| Center<br>Number | Atomic<br>Number | Atomic<br>Type | Coordinates (Angstroms) |           |           |
|------------------|------------------|----------------|-------------------------|-----------|-----------|
|                  |                  |                | X                       | Y         | Z         |
| 1                | 44               | 0              | 0.172195                | 0.003390  | -0.093496 |
| 2                | 15               | 0              | 2.628097                | -0.186856 | -0.185387 |
| 3                | 6                | 0              | 3.462966                | 0.207592  | -1.797718 |
| 4                | 6                | 0              | 3.557101                | 0.886979  | 0.998945  |
| 5                | 6                | 0              | 3.294583                | -1.861382 | 0.184666  |
| 6                | 17               | 0              | 0.039269                | -2.339139 | -0.671010 |
| 7                | 6                | 0              | 0.211663                | 1.818689  | 1.032066  |
| 8                | 6                | 0              | 0.284808                | 2.430935  | -0.066222 |
| 9                | 6                | 0              | 0.038233                | 0.998774  | -1.709802 |
| 10               | 6                | 0              | -1.958137               | -0.042675 | -0.023362 |
| 11               | 6                | 0              | -4.180821               | -0.378883 | -0.731534 |
| 12               | 7                | 0              | -2.759011               | -0.291068 | -1.095162 |
| 13               | 7                | 0              | -2.768212               | 0.187625  | 1.030825  |
| 14               | 6                | 0              | -4.191880               | 0.220508  | 0.673469  |
| 15               | 6                | 0              | -2.396366               | -0.873759 | -2.376769 |
| 16               | 6                | 0              | -2.397881               | 0.576803  | 2.379431  |
| 17               | 1                | 0              | 3.289504                | 1.251780  | -2.081025 |
| 18               | 1                | 0              | 4.544711                | 0.043502  | -1.736852 |
| 19               | 1                | 0              | 3.054291                | -0.434489 | -2.584896 |
| 20               | 1                | 0              | 3.211016                | 0.645891  | 2.007927  |
| 21               | 1                | 0              | 4.637737                | 0.718768  | 0.929611  |
| 22               | 1                | 0              | 3.345389                | 1.942432  | 0.800359  |
| 23               | 1                | 0              | 4.390529                | -1.848903 | 0.192460  |
| 24               | 1                | 0              | 2.907990                | -2.169373 | 1.158824  |
| 25               | 1                | 0              | 2.930468                | -2.569870 | -0.562553 |
| 26               | 1                | 0              | 0.892252                | 1.247327  | -2.351281 |
| 27               | 1                | 0              | -0.894708               | 1.421516  | -2.101718 |
| 28               | 1                | 0              | -4.500100               | -1.431117 | -0.739406 |
| 29               | 1                | 0              | -4.802857               | 0.171323  | -1.445476 |
| 30               | 1                | 0              | -4.784721               | -0.358447 | 1.388648  |
| 31               | 1                | 0              | -4.559063               | 1.257447  | 0.686162  |
| 32               | 1                | 0              | -2.795914               | -1.893804 | -2.448078 |
| 33               | 1                | 0              | -1.316644               | -0.934400 | -2.475145 |
| 34               | 1                | 0              | -2.823377               | -0.273957 | -3.191473 |
| 35               | 1                | 0              | -2.471644               | 1.665897  | 2.514849  |
| 36               | 1                | 0              | -1.390710               | 0.222562  | 2.600694  |
| 37               | 1                | 0              | -3.090594               | 0.098091  | 3.080830  |
| 38               | 6                | 0              | 0.520995                | 3.633250  | -0.897917 |
| 39               | 1                | 0              | 1.460550                | 3.564409  | -1.458127 |
| 40               | 1                | 0              | 0.586997                | 4.499428  | -0.228153 |
| 41               | 1                | 0              | -0.286203               | 3.815375  | -1.615027 |
| 42               | 1                | 0              | 0.234587                | 1.857922  | 2.104679  |
| 43               | 17               | 0              | 0.693170                | -0.886302 | 2.371458  |

## 18b

```

Zero-point correction=                0.358731
(Hartree/Particle)
Thermal correction to Energy=         0.384898
Thermal correction to Enthalpy=       0.385842
Thermal correction to Gibbs Free Energy= 0.302578
Sum of electronic and zero-point Energies= -1937.130737
Sum of electronic and thermal Energies= -1937.104571
Sum of electronic and thermal Enthalpies= -1937.103626
Sum of electronic and thermal Free Energies= -1937.186891

```

| Center<br>Number | Atomic<br>Number | Atomic<br>Type | Coordinates (Angstroms) |           |           |
|------------------|------------------|----------------|-------------------------|-----------|-----------|
|                  |                  |                | X                       | Y         | Z         |
| 1                | 44               | 0              | 0.163093                | 0.193748  | 0.042359  |
| 2                | 15               | 0              | 2.530959                | -0.461950 | 0.065571  |
| 3                | 6                | 0              | 3.323869                | -0.547248 | -1.600559 |
| 4                | 6                | 0              | 3.646971                | 0.656095  | 1.032961  |
| 5                | 6                | 0              | 2.935531                | -2.097274 | 0.800642  |
| 6                | 17               | 0              | 0.164508                | -2.188390 | -1.031624 |
| 7                | 6                | 0              | 0.152744                | 1.982193  | 0.539663  |
| 8                | 6                | 0              | 0.526140                | 2.320355  | -0.805957 |
| 9                | 6                | 0              | -0.191041               | 1.712855  | -1.836737 |
| 10               | 6                | 0              | -1.979428               | 0.002676  | -0.008608 |
| 11               | 6                | 0              | -4.132542               | -0.643076 | -0.672178 |
| 12               | 7                | 0              | -2.735367               | -0.396265 | -1.055944 |
| 13               | 7                | 0              | -2.811734               | 0.239357  | 1.030746  |
| 14               | 6                | 0              | -4.226535               | 0.087547  | 0.664485  |
| 15               | 6                | 0              | -2.325766               | -0.864556 | -2.369124 |
| 16               | 6                | 0              | -2.525505               | 0.994733  | 2.238132  |
| 17               | 6                | 0              | 1.802686                | 3.091933  | -1.087147 |
| 18               | 1                | 0              | 3.335844                | 0.437036  | -2.078648 |
| 19               | 1                | 0              | 4.353243                | -0.916453 | -1.527505 |
| 20               | 1                | 0              | 2.731698                | -1.232240 | -2.213459 |
| 21               | 1                | 0              | 3.245122                | 0.741577  | 2.046746  |
| 22               | 1                | 0              | 4.662031                | 0.245910  | 1.081031  |
| 23               | 1                | 0              | 3.691375                | 1.651537  | 0.583938  |
| 24               | 1                | 0              | 4.016831                | -2.265969 | 0.736547  |
| 25               | 1                | 0              | 2.607909                | -2.105668 | 1.841484  |
| 26               | 1                | 0              | 2.390062                | -2.870302 | 0.258193  |
| 27               | 1                | 0              | 0.182751                | 2.599587  | 1.439574  |
| 28               | 1                | 0              | 0.257737                | 1.652017  | -2.826161 |
| 29               | 1                | 0              | -1.266508               | 1.622650  | -1.795081 |
| 30               | 1                | 0              | -4.299891               | -1.724415 | -0.571033 |
| 31               | 1                | 0              | -4.819082               | -0.257431 | -1.432556 |
| 32               | 1                | 0              | -4.768041               | -0.473386 | 1.431899  |
| 33               | 1                | 0              | -4.695011               | 1.078962  | 0.567611  |
| 34               | 1                | 0              | -2.403723               | -1.954813 | -2.432225 |
| 35               | 1                | 0              | -1.290887               | -0.599134 | -2.557711 |
| 36               | 1                | 0              | -2.985171               | -0.406546 | -3.118499 |
| 37               | 1                | 0              | -2.751490               | 2.062207  | 2.089986  |
| 38               | 1                | 0              | -1.486907               | 0.852914  | 2.525870  |
| 39               | 1                | 0              | -3.161044               | 0.616990  | 3.046011  |
| 40               | 1                | 0              | 2.397545                | 2.614019  | -1.872930 |
| 41               | 1                | 0              | 2.423567                | 3.211747  | -0.196232 |
| 42               | 1                | 0              | 1.534529                | 4.094186  | -1.444565 |
| 43               | 17               | 0              | 0.291020                | -0.714534 | 2.347700  |



## 19b

```

Zero-point correction=                0.355858
(Hartree/Particle)
Thermal correction to Energy=         0.382593
Thermal correction to Enthalpy=       0.383538
Thermal correction to Gibbs Free Energy= 0.300678
Sum of electronic and zero-point Energies= -1937.087120
Sum of electronic and thermal Energies= -1937.060385
Sum of electronic and thermal Enthalpies= -1937.059440
Sum of electronic and thermal Free Energies= -1937.142301
  
```

| Center<br>Number | Atomic<br>Number | Atomic<br>Type | Coordinates (Angstroms) |           |           |
|------------------|------------------|----------------|-------------------------|-----------|-----------|
|                  |                  |                | X                       | Y         | Z         |
| 1                | 44               | 0              | 0.156421                | -0.099985 | -0.291098 |
| 2                | 15               | 0              | 2.606999                | -0.359732 | 0.019515  |
| 3                | 6                | 0              | 3.258380                | -1.937901 | -0.690870 |
| 4                | 6                | 0              | 3.787929                | 0.870282  | -0.705663 |
| 5                | 6                | 0              | 3.173956                | -0.462737 | 1.765794  |
| 6                | 6                | 0              | 0.326388                | -1.185204 | -1.796641 |
| 7                | 6                | 0              | -1.992154               | -0.062598 | -0.081714 |
| 8                | 6                | 0              | -4.193426               | -0.862484 | 0.101575  |
| 9                | 7                | 0              | -2.817575               | -1.102222 | -0.357056 |
| 10               | 7                | 0              | -2.760436               | 0.957257  | 0.355230  |
| 11               | 6                | 0              | -4.196015               | 0.646931  | 0.322107  |
| 12               | 6                | 0              | -2.491427               | -2.470017 | -0.712803 |
| 13               | 6                | 0              | -2.404183               | 2.350395  | 0.559795  |
| 14               | 1                | 0              | 3.180034                | -1.924694 | -1.782724 |
| 15               | 1                | 0              | 4.307748                | -2.084443 | -0.412033 |
| 16               | 1                | 0              | 2.659243                | -2.764392 | -0.299757 |
| 17               | 1                | 0              | 3.698524                | 1.822619  | -0.177987 |
| 18               | 1                | 0              | 4.818839                | 0.512298  | -0.605875 |
| 19               | 1                | 0              | 3.567806                | 1.030705  | -1.765793 |
| 20               | 1                | 0              | 4.245488                | -0.692471 | 1.796248  |
| 21               | 1                | 0              | 2.965252                | 0.481174  | 2.270921  |
| 22               | 1                | 0              | 2.600860                | -1.246224 | 2.265778  |
| 23               | 1                | 0              | 0.608302                | -2.242102 | -1.704542 |
| 24               | 1                | 0              | 0.249924                | -0.862913 | -2.846497 |
| 25               | 1                | 0              | -4.376633               | -1.421267 | 1.030283  |
| 26               | 1                | 0              | -4.917342               | -1.196981 | -0.648456 |
| 27               | 1                | 0              | -4.676985               | 0.951352  | 1.256672  |
| 28               | 1                | 0              | -4.676720               | 1.193120  | -0.503581 |
| 29               | 1                | 0              | -2.498165               | -3.120794 | 0.168524  |
| 30               | 1                | 0              | -1.501949               | -2.516601 | -1.156689 |
| 31               | 1                | 0              | -3.236511               | -2.825881 | -1.435456 |
| 32               | 1                | 0              | -2.696486               | 2.953526  | -0.312072 |
| 33               | 1                | 0              | -1.339681               | 2.434203  | 0.756018  |
| 34               | 1                | 0              | -2.943240               | 2.722038  | 1.438175  |
| 35               | 17               | 0              | 0.172745                | -2.142405 | 1.103170  |
| 36               | 6                | 0              | 0.461086                | 2.096293  | -1.291266 |
| 37               | 6                | 0              | -0.369778               | 1.408786  | -1.890781 |
| 38               | 6                | 0              | 1.280004                | 3.208310  | -0.797047 |
| 39               | 1                | 0              | -1.103148               | 1.153057  | -2.627896 |
| 40               | 1                | 0              | 2.267307                | 3.221956  | -1.269597 |
| 41               | 1                | 0              | 1.394076                | 3.137060  | 0.289519  |
| 42               | 1                | 0              | 0.780047                | 4.155328  | -1.036619 |
| 43               | 17               | 0              | 0.405928                | 1.338879  | 1.905469  |

## TS (19-20)b

```

Zero-point correction=                0.354702
(Hartree/Particle)
Thermal correction to Energy=         0.381007
Thermal correction to Enthalpy=       0.381951
Thermal correction to Gibbs Free Energy= 0.299837
Sum of electronic and zero-point Energies= -1937.075119
Sum of electronic and thermal Energies= -1937.048815
Sum of electronic and thermal Enthalpies= -1937.047871
Sum of electronic and thermal Free Energies= -1937.129984
  
```

| Center<br>Number | Atomic<br>Number | Atomic<br>Type | Coordinates (Angstroms) |           |           |
|------------------|------------------|----------------|-------------------------|-----------|-----------|
|                  |                  |                | X                       | Y         | Z         |
| 1                | 44               | 0              | 0.163991                | -0.093863 | -0.176859 |
| 2                | 15               | 0              | 2.606578                | -0.378596 | -0.125160 |
| 3                | 6                | 0              | 3.152538                | -2.014617 | -0.797544 |
| 4                | 6                | 0              | 3.712887                | 0.785284  | -1.057645 |
| 5                | 6                | 0              | 3.358887                | -0.373184 | 1.554063  |
| 6                | 17               | 0              | 0.222455                | -2.048021 | 1.283378  |
| 7                | 6                | 0              | 0.489092                | 2.050796  | -1.105178 |
| 8                | 6                | 0              | -0.086537               | 1.406230  | -2.001189 |
| 9                | 6                | 0              | 0.081468                | -0.859330 | -1.904725 |
| 10               | 6                | 0              | -1.964270               | -0.103849 | -0.076623 |
| 11               | 6                | 0              | -4.178754               | -0.905907 | -0.091722 |
| 12               | 7                | 0              | -2.760748               | -1.162033 | -0.383441 |
| 13               | 7                | 0              | -2.781072               | 0.923498  | 0.246510  |
| 14               | 6                | 0              | -4.203980               | 0.612570  | 0.063296  |
| 15               | 6                | 0              | -2.394594               | -2.555069 | -0.578342 |
| 16               | 6                | 0              | -2.422018               | 2.309714  | 0.482936  |
| 17               | 6                | 0              | 1.091477                | 3.241279  | -0.480275 |
| 18               | 1                | 0              | 2.922273                | -2.088013 | -1.865576 |
| 19               | 1                | 0              | 4.229853                | -2.161381 | -0.660535 |
| 20               | 1                | 0              | 2.604212                | -2.798985 | -0.268917 |
| 21               | 1                | 0              | 3.671371                | 1.777863  | -0.599955 |
| 22               | 1                | 0              | 4.752588                | 0.439384  | -1.042976 |
| 23               | 1                | 0              | 3.383457                | 0.871702  | -2.098479 |
| 24               | 1                | 0              | 4.433225                | -0.584651 | 1.504672  |
| 25               | 1                | 0              | 3.179024                | 0.595843  | 2.024430  |
| 26               | 1                | 0              | 2.850451                | -1.130054 | 2.156028  |
| 27               | 1                | 0              | -0.661120               | 1.284621  | -2.898183 |
| 28               | 1                | 0              | 0.948026                | -1.023815 | -2.560014 |
| 29               | 1                | 0              | -0.851503               | -1.102055 | -2.432966 |
| 30               | 1                | 0              | -4.465098               | -1.425171 | 0.834281  |
| 31               | 1                | 0              | -4.817689               | -1.274313 | -0.901185 |
| 32               | 1                | 0              | -4.789518               | 0.953015  | 0.923131  |
| 33               | 1                | 0              | -4.588764               | 1.121056  | -0.833883 |
| 34               | 1                | 0              | -2.679666               | -3.149009 | 0.299330  |
| 35               | 1                | 0              | -1.321737               | -2.655192 | -0.708160 |
| 36               | 1                | 0              | -2.925530               | -2.947291 | -1.455879 |
| 37               | 1                | 0              | -2.509351               | 2.905558  | -0.437405 |
| 38               | 1                | 0              | -1.412459               | 2.357078  | 0.886475  |
| 39               | 1                | 0              | -3.108469               | 2.723604  | 1.229924  |
| 40               | 1                | 0              | 2.045166                | 3.475086  | -0.967732 |
| 41               | 1                | 0              | 1.247179                | 3.080386  | 0.590088  |
| 42               | 1                | 0              | 0.426876                | 4.103776  | -0.613915 |
| 43               | 17               | 0              | 0.371574                | 1.257792  | 2.038551  |

## 20b

```

Zero-point correction=                0.359298
(Hartree/Particle)
Thermal correction to Energy=         0.385202
Thermal correction to Enthalpy=       0.386146
Thermal correction to Gibbs Free Energy= 0.304426
Sum of electronic and zero-point Energies= -1937.143047
Sum of electronic and thermal Energies= -1937.117143
Sum of electronic and thermal Enthalpies= -1937.116199
Sum of electronic and thermal Free Energies= -1937.197919

```

| Center<br>Number | Atomic<br>Number | Atomic<br>Type | Coordinates (Angstroms) |           |           |
|------------------|------------------|----------------|-------------------------|-----------|-----------|
|                  |                  |                | X                       | Y         | Z         |
| 1                | 44               | 0              | -0.174979               | 0.071489  | 0.167213  |
| 2                | 15               | 0              | -2.603019               | -0.275468 | -0.076925 |
| 3                | 6                | 0              | -3.271636               | -1.790657 | 0.742877  |
| 4                | 6                | 0              | -3.713621               | 1.053634  | 0.584252  |
| 5                | 6                | 0              | -3.201636               | -0.453246 | -1.805444 |
| 6                | 17               | 0              | -0.319245               | -2.202970 | -1.065791 |
| 7                | 6                | 0              | -0.334040               | 1.608301  | 1.214825  |
| 8                | 6                | 0              | 0.199305                | 0.740789  | 2.232894  |
| 9                | 6                | 0              | -0.405887               | -0.500740 | 2.460212  |
| 10               | 6                | 0              | 1.951396                | -0.107244 | -0.012493 |
| 11               | 6                | 0              | 4.082865                | -1.083294 | -0.041381 |
| 12               | 7                | 0              | 2.675081                | -1.181498 | 0.367495  |
| 13               | 7                | 0              | 2.811011                | 0.818778  | -0.490072 |
| 14               | 6                | 0              | 4.215459                | 0.404143  | -0.368984 |
| 15               | 6                | 0              | 2.209295                | -2.466371 | 0.858130  |
| 16               | 6                | 0              | 2.548438                | 2.219548  | -0.762060 |
| 17               | 6                | 0              | -0.635059               | 3.056335  | 1.166830  |
| 18               | 1                | 0              | -3.209468               | -1.711021 | 1.832357  |
| 19               | 1                | 0              | -4.319701               | -1.945082 | 0.463074  |
| 20               | 1                | 0              | -2.669354               | -2.640678 | 0.413070  |
| 21               | 1                | 0              | -3.482476               | 1.996746  | 0.079798  |
| 22               | 1                | 0              | -4.768445               | 0.810957  | 0.412759  |
| 23               | 1                | 0              | -3.553757               | 1.184963  | 1.659792  |
| 24               | 1                | 0              | -4.273680               | -0.682331 | -1.804175 |
| 25               | 1                | 0              | -3.007879               | 0.471381  | -2.351323 |
| 26               | 1                | 0              | -2.637787               | -1.257530 | -2.281775 |
| 27               | 1                | 0              | 1.224670                | 0.904904  | 2.578341  |
| 28               | 1                | 0              | -1.480802               | -0.598098 | 2.530250  |
| 29               | 1                | 0              | 0.166000                | -1.282456 | 2.952088  |
| 30               | 1                | 0              | 4.258019                | -1.723299 | -0.917323 |
| 31               | 1                | 0              | 4.746062                | -1.414689 | 0.764165  |
| 32               | 1                | 0              | 4.757833                | 0.597763  | -1.299415 |
| 33               | 1                | 0              | 4.705721                | 0.970894  | 0.437129  |
| 34               | 1                | 0              | 2.306093                | -3.234188 | 0.082750  |
| 35               | 1                | 0              | 1.160728                | -2.398640 | 1.128903  |
| 36               | 1                | 0              | 2.816259                | -2.750790 | 1.728006  |
| 37               | 1                | 0              | 2.856702                | 2.843317  | 0.091743  |
| 38               | 1                | 0              | 1.493099                | 2.355267  | -0.987201 |
| 39               | 1                | 0              | 3.128674                | 2.527449  | -1.638732 |
| 40               | 1                | 0              | -1.516779               | 3.282533  | 1.783857  |
| 41               | 1                | 0              | -0.814318               | 3.388772  | 0.141519  |
| 42               | 1                | 0              | 0.198153                | 3.629645  | 1.600415  |
| 43               | 17               | 0              | -0.363762               | 1.268414  | -2.014412 |

## 17c

```

Zero-point correction=                0.412784
(Hartree/Particle)
Thermal correction to Energy=         0.442326
Thermal correction to Enthalpy=       0.443270
Thermal correction to Gibbs Free Energy= 0.353758
Sum of electronic and zero-point Energies= -2015.658417
Sum of electronic and thermal Energies= -2015.628875
Sum of electronic and thermal Enthalpies= -2015.627931
Sum of electronic and thermal Free Energies= -2015.717443

```

| Center<br>Number | Atomic<br>Number | Atomic<br>Type | Coordinates (Angstroms) |           |           |
|------------------|------------------|----------------|-------------------------|-----------|-----------|
|                  |                  |                | X                       | Y         | Z         |
| 1                | 44               | 0              | 0.373760                | -0.095211 | -0.145376 |
| 2                | 15               | 0              | 2.829780                | 0.235981  | -0.041309 |
| 3                | 6                | 0              | 3.630232                | 0.731171  | -1.635649 |
| 4                | 6                | 0              | 3.461438                | 1.523552  | 1.125060  |
| 5                | 6                | 0              | 3.812401                | -1.243017 | 0.437302  |
| 6                | 17               | 0              | 1.003020                | -2.295109 | -1.084226 |
| 7                | 6                | 0              | 0.232073                | 1.804783  | 1.088170  |
| 8                | 6                | 0              | -0.664750               | 2.021360  | 0.267823  |
| 9                | 6                | 0              | 0.397385                | 0.556777  | -1.886173 |
| 10               | 6                | 0              | -1.648634               | -0.807971 | 0.010901  |
| 11               | 6                | 0              | -3.724439               | -1.701087 | -0.638240 |
| 12               | 7                | 0              | -2.335080               | -1.389326 | -1.000177 |
| 13               | 7                | 0              | -2.459238               | -0.793308 | 1.093399  |
| 14               | 6                | 0              | -3.688883               | -1.571931 | 0.881638  |
| 15               | 6                | 0              | -1.970537               | -1.453606 | -2.404709 |
| 16               | 6                | 0              | -2.168487               | -0.392133 | 2.459707  |
| 17               | 6                | 0              | -1.759688               | 2.661673  | -0.497812 |
| 18               | 6                | 0              | -1.311221               | 4.045183  | -1.015552 |
| 19               | 6                | 0              | -3.032805               | 2.781708  | 0.365519  |
| 20               | 1                | 0              | 3.232940                | 1.692871  | -1.976028 |
| 21               | 1                | 0              | 4.717413                | 0.812387  | -1.525504 |
| 22               | 1                | 0              | 3.405763                | -0.026819 | -2.392156 |
| 23               | 1                | 0              | 3.143584                | 1.259053  | 2.137846  |
| 24               | 1                | 0              | 4.555897                | 1.561216  | 1.093776  |
| 25               | 1                | 0              | 3.065410                | 2.510507  | 0.866681  |
| 26               | 1                | 0              | 4.877784                | -0.985735 | 0.465907  |
| 27               | 1                | 0              | 3.470235                | -1.583459 | 1.416162  |
| 28               | 1                | 0              | 3.630895                | -2.039632 | -0.286049 |
| 29               | 1                | 0              | 0.868750                | 1.879857  | 1.943847  |
| 30               | 1                | 0              | 0.773636                | -0.058688 | -2.712988 |
| 31               | 1                | 0              | 0.163836                | 1.584951  | -2.200176 |
| 32               | 1                | 0              | -3.998504               | -2.702723 | -0.982287 |
| 33               | 1                | 0              | -4.410712               | -0.977877 | -1.104957 |
| 34               | 1                | 0              | -3.600611               | -2.545724 | 1.383478  |
| 35               | 1                | 0              | -4.555451               | -1.048226 | 1.297445  |
| 36               | 1                | 0              | -2.542946               | -2.263447 | -2.868138 |
| 37               | 1                | 0              | -0.911561               | -1.683517 | -2.498862 |
| 38               | 1                | 0              | -2.212533               | -0.516510 | -2.928245 |
| 39               | 1                | 0              | -3.038902               | 0.149195  | 2.852268  |
| 40               | 1                | 0              | -1.288395               | 0.239385  | 2.488041  |
| 41               | 1                | 0              | -1.973581               | -1.268356 | 3.087898  |
| 42               | 1                | 0              | -1.993958               | 2.033574  | -1.365701 |
| 43               | 1                | 0              | -0.426860               | 3.964703  | -1.655602 |
| 44               | 1                | 0              | -1.064692               | 4.709237  | -0.179875 |

|    |    |   |           |           |           |
|----|----|---|-----------|-----------|-----------|
| 45 | 1  | 0 | -2.117081 | 4.508633  | -1.596469 |
| 46 | 1  | 0 | -2.848323 | 3.411458  | 1.242689  |
| 47 | 1  | 0 | -3.365628 | 1.799684  | 0.712141  |
| 48 | 1  | 0 | -3.839427 | 3.237922  | -0.220042 |
| 49 | 17 | 0 | 0.971486  | -0.967519 | 2.291323  |

### TS (17-18) c

Zero-point correction= 0.412650  
(Hartree/Particle)  
Thermal correction to Energy= 0.441234  
Thermal correction to Enthalpy= 0.442178  
Thermal correction to Gibbs Free Energy= 0.354500  
Sum of electronic and zero-point Energies= -2015.644020  
Sum of electronic and thermal Energies= -2015.615436  
Sum of electronic and thermal Enthalpies= -2015.614492  
Sum of electronic and thermal Free Energies= -2015.702170

| Center<br>Number | Atomic<br>Number | Atomic<br>Type | Coordinates (Angstroms) |           |           |
|------------------|------------------|----------------|-------------------------|-----------|-----------|
|                  |                  |                | X                       | Y         | Z         |
| 1                | 44               | 0              | 0.097160                | -0.329587 | -0.083824 |
| 2                | 15               | 0              | 2.520777                | -0.788290 | -0.127254 |
| 3                | 6                | 0              | 3.446410                | -0.392935 | -1.687727 |
| 4                | 6                | 0              | 3.523148                | 0.090431  | 1.154272  |
| 5                | 6                | 0              | 2.983186                | -2.548554 | 0.147275  |
| 6                | 17               | 0              | -0.236192               | -2.580654 | -0.894291 |
| 7                | 6                | 0              | 0.338290                | 1.346341  | 1.214298  |
| 8                | 6                | 0              | 0.407070                | 2.073903  | 0.186048  |
| 9                | 6                | 0              | 0.131943                | 0.829671  | -1.594126 |
| 10               | 6                | 0              | -2.025254               | -0.156157 | -0.065673 |
| 11               | 6                | 0              | -4.248957               | -0.233946 | -0.838301 |
| 12               | 7                | 0              | -2.816810               | -0.240506 | -1.170218 |
| 13               | 7                | 0              | -2.838585               | 0.073176  | 0.986520  |
| 14               | 6                | 0              | -4.241647               | 0.272993  | 0.601675  |
| 15               | 6                | 0              | -2.476825               | -0.759352 | -2.485251 |
| 16               | 6                | 0              | -2.466908               | 0.341685  | 2.364164  |
| 17               | 6                | 0              | 0.584336                | 3.412924  | -0.461335 |
| 18               | 6                | 0              | 2.030766                | 3.651265  | -0.936103 |
| 19               | 6                | 0              | 0.153129                | 4.493867  | 0.552646  |
| 20               | 1                | 0              | 3.406444                | 0.680168  | -1.903007 |
| 21               | 1                | 0              | 4.498542                | -0.689720 | -1.612861 |
| 22               | 1                | 0              | 2.987737                | -0.930112 | -2.524338 |
| 23               | 1                | 0              | 3.122529                | -0.184913 | 2.134099  |
| 24               | 1                | 0              | 4.581423                | -0.188073 | 1.098984  |
| 25               | 1                | 0              | 3.430987                | 1.174111  | 1.031370  |
| 26               | 1                | 0              | 4.072482                | -2.659392 | 0.199494  |
| 27               | 1                | 0              | 2.518576                | -2.876603 | 1.079961  |
| 28               | 1                | 0              | 2.580842                | -3.159753 | -0.663385 |
| 29               | 1                | 0              | 0.385139                | 1.260686  | 2.283572  |
| 30               | 1                | 0              | 1.032118                | 1.063682  | -2.173639 |
| 31               | 1                | 0              | -0.745912               | 1.358500  | -1.983261 |
| 32               | 1                | 0              | -4.651461               | -1.254280 | -0.918719 |
| 33               | 1                | 0              | -4.808401               | 0.409231  | -1.525612 |
| 34               | 1                | 0              | -4.909368               | -0.286729 | 1.263983  |
| 35               | 1                | 0              | -4.503899               | 1.339228  | 0.673701  |
| 36               | 1                | 0              | -2.912412               | -1.757757 | -2.620152 |
| 37               | 1                | 0              | -1.400386               | -0.850924 | -2.592917 |
| 38               | 1                | 0              | -2.881727               | -0.091952 | -3.257313 |

|    |    |   |           |           |           |
|----|----|---|-----------|-----------|-----------|
| 39 | 1  | 0 | -2.414935 | 1.422577  | 2.560724  |
| 40 | 1  | 0 | -1.516061 | -0.142734 | 2.588205  |
| 41 | 1  | 0 | -3.232811 | -0.088712 | 3.018948  |
| 42 | 1  | 0 | -0.077883 | 3.486672  | -1.332144 |
| 43 | 1  | 0 | 2.347297  | 2.903029  | -1.668521 |
| 44 | 1  | 0 | 2.725466  | 3.617717  | -0.089747 |
| 45 | 1  | 0 | 2.111061  | 4.638114  | -1.405759 |
| 46 | 1  | 0 | 0.785848  | 4.463354  | 1.446249  |
| 47 | 1  | 0 | -0.886501 | 4.353358  | 0.863208  |
| 48 | 1  | 0 | 0.249886  | 5.486660  | 0.098734  |
| 49 | 17 | 0 | 0.399386  | -1.509392 | 2.300288  |

### 18c

Zero-point correction= 0.415783  
(Hartree/Particle)  
Thermal correction to Energy= 0.444652  
Thermal correction to Enthalpy= 0.445597  
Thermal correction to Gibbs Free Energy= 0.355596  
Sum of electronic and zero-point Energies= -2015.697079  
Sum of electronic and thermal Energies= -2015.668209  
Sum of electronic and thermal Enthalpies= -2015.667265  
Sum of electronic and thermal Free Energies= -2015.757266

| Center<br>Number | Atomic<br>Number | Atomic<br>Type | Coordinates (Angstroms) |           |           |
|------------------|------------------|----------------|-------------------------|-----------|-----------|
|                  |                  |                | X                       | Y         | Z         |
| 1                | 44               | 0              | -0.105307               | -0.426058 | 0.004040  |
| 2                | 15               | 0              | -2.433043               | -1.244467 | 0.166686  |
| 3                | 6                | 0              | -3.211818               | -1.318312 | 1.840993  |
| 4                | 6                | 0              | -3.728469               | -0.420197 | -0.858493 |
| 5                | 6                | 0              | -2.516349               | -3.006697 | -0.380987 |
| 6                | 6                | 0              | -0.966185               | 1.281323  | 1.044165  |
| 7                | 6                | 0              | 2.002586                | -0.335035 | -0.050029 |
| 8                | 6                | 0              | 4.259032                | 0.201176  | 0.302177  |
| 9                | 7                | 0              | 2.850680                | 0.458272  | 0.629169  |
| 10               | 7                | 0              | 2.744327                | -1.217293 | -0.764292 |
| 11               | 6                | 0              | 4.172215                | -1.144470 | -0.421468 |
| 12               | 6                | 0              | 2.518413                | 1.550979  | 1.520035  |
| 13               | 6                | 0              | 2.260762                | -2.456257 | -1.351668 |
| 14               | 1                | 0              | -3.372303               | -0.308523 | 2.230304  |
| 15               | 1                | 0              | -4.174892               | -1.839682 | 1.801958  |
| 16               | 1                | 0              | -2.533781               | -1.837926 | 2.522606  |
| 17               | 1                | 0              | -3.408614               | -0.431325 | -1.903079 |
| 18               | 1                | 0              | -4.694857               | -0.927062 | -0.758322 |
| 19               | 1                | 0              | -3.839195               | 0.622264  | -0.543263 |
| 20               | 1                | 0              | -3.539170               | -3.395162 | -0.320278 |
| 21               | 1                | 0              | -2.157459               | -3.070762 | -1.411482 |
| 22               | 1                | 0              | -1.865627               | -3.611947 | 0.258355  |
| 23               | 1                | 0              | -0.549940               | 1.283747  | 2.055273  |
| 24               | 1                | 0              | -2.056763               | 1.230282  | 1.103620  |
| 25               | 1                | 0              | 4.868297                | 0.165777  | 1.210858  |
| 26               | 1                | 0              | 4.650739                | 0.999352  | -0.344658 |
| 27               | 1                | 0              | 4.441979                | -1.985754 | 0.233993  |
| 28               | 1                | 0              | 4.792129                | -1.195658 | -1.321812 |
| 29               | 1                | 0              | 3.222456                | 1.541641  | 2.360033  |
| 30               | 1                | 0              | 1.515547                | 1.406861  | 1.910290  |
| 31               | 1                | 0              | 2.582876                | 2.522976  | 1.015405  |
| 32               | 1                | 0              | 2.877875                | -2.703996 | -2.222061 |

|    |    |   |           |           |           |
|----|----|---|-----------|-----------|-----------|
| 33 | 1  | 0 | 1.233919  | -2.331436 | -1.692075 |
| 34 | 1  | 0 | 2.321955  | -3.282368 | -0.628272 |
| 35 | 17 | 0 | 0.323240  | -1.351643 | 2.221325  |
| 36 | 6  | 0 | 0.226094  | 1.479304  | -0.771650 |
| 37 | 6  | 0 | -0.426543 | 2.272236  | 0.069072  |
| 38 | 6  | 0 | -0.633252 | 3.773453  | 0.089944  |
| 39 | 6  | 0 | -2.130657 | 4.133126  | 0.015937  |
| 40 | 6  | 0 | 0.154757  | 4.478644  | -1.021861 |
| 41 | 1  | 0 | 0.787365  | 1.664737  | -1.681436 |
| 42 | 1  | 0 | -0.260814 | 4.143626  | 1.060370  |
| 43 | 1  | 0 | -2.699454 | 3.660051  | 0.824412  |
| 44 | 1  | 0 | -2.559255 | 3.803932  | -0.938487 |
| 45 | 1  | 0 | -2.274331 | 5.217466  | 0.097240  |
| 46 | 1  | 0 | -0.186294 | 4.148581  | -2.010373 |
| 47 | 1  | 0 | 1.227395  | 4.264778  | -0.949914 |
| 48 | 1  | 0 | 0.020603  | 5.565070  | -0.964499 |
| 49 | 17 | 0 | -0.575582 | -0.738266 | -2.390965 |

## 19c

Zero-point correction= 0.412550  
(Hartree/Particle)  
Thermal correction to Energy= 0.442236  
Thermal correction to Enthalpy= 0.443180  
Thermal correction to Gibbs Free Energy= 0.353060  
Sum of electronic and zero-point Energies= -2015.664464  
Sum of electronic and thermal Energies= -2015.634778  
Sum of electronic and thermal Enthalpies= -2015.633834  
Sum of electronic and thermal Free Energies= -2015.723954

| Center<br>Number | Atomic<br>Number | Atomic<br>Type | Coordinates (Angstroms) |           |           |
|------------------|------------------|----------------|-------------------------|-----------|-----------|
|                  |                  |                | X                       | Y         | Z         |
| 1                | 44               | 0              | -0.368003               | -0.272893 | -0.363382 |
| 2                | 15               | 0              | -2.797448               | 0.056143  | -0.162013 |
| 3                | 6                | 0              | -3.592464               | -0.859956 | 1.218971  |
| 4                | 6                | 0              | -3.373910               | 1.788693  | 0.104259  |
| 5                | 6                | 0              | -3.791471               | -0.492585 | -1.624436 |
| 6                | 6                | 0              | -0.412302               | -0.867045 | -2.125195 |
| 7                | 6                | 0              | 1.695010                | -0.746336 | -0.039130 |
| 8                | 6                | 0              | 3.672715                | -1.563594 | 0.917205  |
| 9                | 7                | 0              | 2.218608                | -1.373485 | 1.022999  |
| 10               | 7                | 0              | 2.708765                | -0.522140 | -0.926342 |
| 11               | 6                | 0              | 3.936396                | -1.239813 | -0.552123 |
| 12               | 6                | 0              | 1.585069                | -1.788704 | 2.266007  |
| 13               | 6                | 0              | 2.564445                | -0.133216 | -2.315843 |
| 14               | 1                | 0              | -3.149607               | -0.520782 | 2.157500  |
| 15               | 1                | 0              | -4.673434               | -0.677108 | 1.217195  |
| 16               | 1                | 0              | -3.384773               | -1.925391 | 1.101873  |
| 17               | 1                | 0              | -3.131473               | 2.416754  | -0.757685 |
| 18               | 1                | 0              | -4.456901               | 1.811566  | 0.268808  |
| 19               | 1                | 0              | -2.857211               | 2.182587  | 0.982941  |
| 20               | 1                | 0              | -4.865391               | -0.354484 | -1.454589 |
| 21               | 1                | 0              | -3.497510               | 0.072643  | -2.515104 |
| 22               | 1                | 0              | -3.590713               | -1.552933 | -1.805293 |
| 23               | 1                | 0              | -0.402608               | -0.229164 | -3.022213 |
| 24               | 1                | 0              | -0.518176               | -1.933156 | -2.359250 |
| 25               | 1                | 0              | 3.945897                | -2.586638 | 1.193275  |
| 26               | 1                | 0              | 4.187748                | -0.874458 | 1.601157  |

|    |    |   |           |           |           |
|----|----|---|-----------|-----------|-----------|
| 27 | 1  | 0 | 4.044415  | -2.147243 | -1.165021 |
| 28 | 1  | 0 | 4.820184  | -0.613388 | -0.708399 |
| 29 | 1  | 0 | 1.725893  | -2.868157 | 2.392199  |
| 30 | 1  | 0 | 0.526780  | -1.555361 | 2.245378  |
| 31 | 1  | 0 | 2.054165  | -1.261131 | 3.106172  |
| 32 | 1  | 0 | 3.514073  | 0.292355  | -2.658607 |
| 33 | 1  | 0 | 1.789982  | 0.624139  | -2.413089 |
| 34 | 1  | 0 | 2.320448  | -0.993388 | -2.957277 |
| 35 | 17 | 0 | -0.859315 | -2.640413 | 0.188816  |
| 36 | 6  | 0 | -0.397516 | 1.762323  | -1.356236 |
| 37 | 6  | 0 | 0.450467  | 1.991868  | -0.486605 |
| 38 | 6  | 0 | 1.428246  | 2.656202  | 0.405344  |
| 39 | 6  | 0 | 0.750383  | 3.855217  | 1.102106  |
| 40 | 6  | 0 | 2.682477  | 3.096919  | -0.376572 |
| 41 | 1  | 0 | -1.036034 | 1.957907  | -2.193642 |
| 42 | 1  | 0 | 1.716858  | 1.945472  | 1.184685  |
| 43 | 1  | 0 | -0.103265 | 3.511391  | 1.689972  |
| 44 | 1  | 0 | 0.410662  | 4.595221  | 0.367925  |
| 45 | 1  | 0 | 1.467016  | 4.342311  | 1.773852  |
| 46 | 1  | 0 | 2.423023  | 3.803569  | -1.173134 |
| 47 | 1  | 0 | 3.194681  | 2.241347  | -0.826036 |
| 48 | 1  | 0 | 3.382423  | 3.595777  | 0.303597  |
| 49 | 17 | 0 | -0.633637 | 0.662438  | 2.125226  |

### TS (19-20) c

|                                              |              |
|----------------------------------------------|--------------|
| Zero-point correction=                       | 0.411948     |
| (Hartree/Particle)                           |              |
| Thermal correction to Energy=                | 0.440961     |
| Thermal correction to Enthalpy=              | 0.441905     |
| Thermal correction to Gibbs Free Energy=     | 0.354012     |
| Sum of electronic and zero-point Energies=   | -2015.640529 |
| Sum of electronic and thermal Energies=      | -2015.611516 |
| Sum of electronic and thermal Enthalpies=    | -2015.610572 |
| Sum of electronic and thermal Free Energies= | -2015.698464 |

| Center<br>Number | Atomic<br>Number | Atomic<br>Type | Coordinates (Angstroms) |           |           |
|------------------|------------------|----------------|-------------------------|-----------|-----------|
|                  |                  |                | X                       | Y         | Z         |
| 1                | 44               | 0              | 0.033300                | -0.376242 | -0.140963 |
| 2                | 15               | 0              | 2.388379                | -1.130531 | -0.173650 |
| 3                | 6                | 0              | 2.545215                | -2.875120 | -0.776994 |
| 4                | 6                | 0              | 3.654002                | -0.298599 | -1.249549 |
| 5                | 6                | 0              | 3.227213                | -1.219811 | 1.463235  |
| 6                | 17               | 0              | -0.280480               | -2.383540 | 1.204040  |
| 7                | 6                | 0              | 0.602061                | 1.873663  | -0.865976 |
| 8                | 6                | 0              | 0.178359                | 1.306005  | -1.882558 |
| 9                | 6                | 0              | -0.177995               | -1.058443 | -1.886596 |
| 10               | 6                | 0              | -2.077294               | -0.073774 | -0.055553 |
| 11               | 6                | 0              | -4.381970               | -0.540974 | -0.247233 |
| 12               | 7                | 0              | -3.000234               | -0.960745 | -0.522788 |
| 13               | 7                | 0              | -2.762698               | 1.000037  | 0.393330  |
| 14               | 6                | 0              | -4.203939               | 0.927741  | 0.127397  |
| 15               | 6                | 0              | -2.831870               | -2.364109 | -0.862913 |
| 16               | 6                | 0              | -2.228619               | 2.252268  | 0.889665  |
| 17               | 6                | 0              | 1.100918                | 3.036137  | -0.086939 |



|    |    |   |           |           |           |
|----|----|---|-----------|-----------|-----------|
| 18 | 6  | 0 | 0.684496  | 4.336898  | -0.805432 |
| 19 | 6  | 0 | 2.621996  | 2.986639  | 0.138566  |
| 20 | 17 | 0 | 0.530136  | 0.741757  | 2.165170  |
| 21 | 1  | 0 | 2.250476  | -2.946547 | -1.829220 |
| 22 | 1  | 0 | 3.576900  | -3.230975 | -0.679941 |
| 23 | 1  | 0 | 1.877621  | -3.506260 | -0.185660 |
| 24 | 1  | 0 | 3.834537  | 0.722339  | -0.907080 |
| 25 | 1  | 0 | 4.602228  | -0.847956 | -1.236036 |
| 26 | 1  | 0 | 3.291327  | -0.251011 | -2.282199 |
| 27 | 1  | 0 | 4.225861  | -1.662562 | 1.371853  |
| 28 | 1  | 0 | 3.290841  | -0.221619 | 1.901470  |
| 29 | 1  | 0 | 2.604550  | -1.826123 | 2.126047  |
| 30 | 1  | 0 | -0.155980 | 1.188141  | -2.891726 |
| 31 | 1  | 0 | 0.626078  | -1.499411 | -2.492720 |
| 32 | 1  | 0 | -1.104036 | -0.981624 | -2.473893 |
| 33 | 1  | 0 | -4.791016 | -1.137427 | 0.581189  |
| 34 | 1  | 0 | -5.019769 | -0.694261 | -1.124258 |
| 35 | 1  | 0 | -4.777301 | 1.224829  | 1.011338  |
| 36 | 1  | 0 | -4.469747 | 1.607807  | -0.695849 |
| 37 | 1  | 0 | -3.318133 | -2.992053 | -0.104924 |
| 38 | 1  | 0 | -1.779851 | -2.631022 | -0.882942 |
| 39 | 1  | 0 | -3.299809 | -2.566585 | -1.835638 |
| 40 | 1  | 0 | -2.184081 | 3.011035  | 0.095045  |
| 41 | 1  | 0 | -1.244987 | 2.073053  | 1.320731  |
| 42 | 1  | 0 | -2.888633 | 2.623397  | 1.682035  |
| 43 | 1  | 0 | 0.638828  | 2.995356  | 0.902763  |
| 44 | 1  | 0 | -0.400469 | 4.391283  | -0.941069 |
| 45 | 1  | 0 | 1.155880  | 4.411720  | -1.792235 |
| 46 | 1  | 0 | 0.999183  | 5.202249  | -0.210968 |
| 47 | 1  | 0 | 3.168583  | 2.972347  | -0.811422 |
| 48 | 1  | 0 | 2.890338  | 2.110367  | 0.731852  |
| 49 | 1  | 0 | 2.930640  | 3.878256  | 0.695494  |

## 20c

|                                              |              |
|----------------------------------------------|--------------|
| Zero-point correction=                       | 0.417032     |
| (Hartree/Particle)                           |              |
| Thermal correction to Energy=                | 0.445595     |
| Thermal correction to Enthalpy=              | 0.446540     |
| Thermal correction to Gibbs Free Energy=     | 0.358618     |
| Sum of electronic and zero-point Energies=   | -2015.709015 |
| Sum of electronic and thermal Energies=      | -2015.680451 |
| Sum of electronic and thermal Enthalpies=    | -2015.679507 |
| Sum of electronic and thermal Free Energies= | -2015.767429 |

| Center<br>Number | Atomic<br>Number | Atomic<br>Type | Coordinates (Angstroms) |           |           |
|------------------|------------------|----------------|-------------------------|-----------|-----------|
|                  |                  |                | X                       | Y         | Z         |
| 1                | 44               | 0              | 0.169530                | -0.127893 | -0.092153 |
| 2                | 15               | 0              | 2.537180                | -0.796078 | 0.100269  |
| 3                | 6                | 0              | 3.114436                | -2.030443 | -1.149266 |
| 4                | 6                | 0              | 3.812186                | 0.540870  | -0.052673 |
| 5                | 6                | 0              | 3.015185                | -1.593555 | 1.686543  |
| 6                | 6                | 0              | 0.330001                | 1.666964  | -0.602792 |
| 7                | 6                | 0              | -0.110074               | 1.146743  | -1.877302 |
| 8                | 6                | 0              | 0.580275                | 0.079404  | -2.451765 |
| 9                | 6                | 0              | -1.969320               | -0.291229 | -0.008330 |
| 10               | 6                | 0              | -4.087169               | -1.210779 | -0.431020 |
| 11               | 7                | 0              | -2.685399               | -1.075081 | -0.847695 |

|    |    |   |           |           |           |
|----|----|---|-----------|-----------|-----------|
| 12 | 7  | 0 | -2.837653 | 0.293035  | 0.842571  |
| 13 | 6  | 0 | -4.236319 | -0.063990 | 0.567240  |
| 14 | 6  | 0 | -2.203286 | -2.027630 | -1.831861 |
| 15 | 6  | 0 | -2.615100 | 1.385089  | 1.770703  |
| 16 | 6  | 0 | 0.495783  | 3.064552  | -0.110269 |
| 17 | 6  | 0 | -0.747736 | 3.915467  | -0.454327 |
| 18 | 6  | 0 | 1.757514  | 3.712864  | -0.724078 |
| 19 | 1  | 0 | 3.072816  | -1.618935 | -2.161911 |
| 20 | 1  | 0 | 4.145352  | -2.333719 | -0.934386 |
| 21 | 1  | 0 | 2.453809  | -2.898940 | -1.092399 |
| 22 | 1  | 0 | 3.641939  | 1.281304  | 0.734459  |
| 23 | 1  | 0 | 4.824587  | 0.134772  | 0.053994  |
| 24 | 1  | 0 | 3.731662  | 1.038587  | -1.024401 |
| 25 | 1  | 0 | 4.054968  | -1.935898 | 1.627829  |
| 26 | 1  | 0 | 2.892550  | -0.879215 | 2.501797  |
| 27 | 1  | 0 | 2.343832  | -2.436191 | 1.862801  |
| 28 | 1  | 0 | -1.121087 | 1.372481  | -2.226254 |
| 29 | 1  | 0 | 1.661638  | 0.050516  | -2.448101 |
| 30 | 1  | 0 | 0.097758  | -0.518593 | -3.219405 |
| 31 | 1  | 0 | -4.235397 | -2.194529 | 0.035749  |
| 32 | 1  | 0 | -4.760263 | -1.132641 | -1.291054 |
| 33 | 1  | 0 | -4.748721 | -0.353789 | 1.490039  |
| 34 | 1  | 0 | -4.763954 | 0.802501  | 0.141699  |
| 35 | 1  | 0 | -2.371197 | -3.052236 | -1.481821 |
| 36 | 1  | 0 | -1.136270 | -1.900296 | -1.978706 |
| 37 | 1  | 0 | -2.745757 | -1.872971 | -2.774318 |
| 38 | 1  | 0 | -3.115325 | 2.294107  | 1.403946  |
| 39 | 1  | 0 | -1.549338 | 1.549912  | 1.904778  |
| 40 | 1  | 0 | -3.043980 | 1.127632  | 2.746003  |
| 41 | 1  | 0 | 0.614028  | 3.023330  | 0.978018  |
| 42 | 1  | 0 | -1.661678 | 3.485842  | -0.034009 |
| 43 | 1  | 0 | -0.875042 | 4.006717  | -1.539616 |
| 44 | 1  | 0 | -0.628009 | 4.924255  | -0.043303 |
| 45 | 1  | 0 | 1.687168  | 3.751164  | -1.817697 |
| 46 | 1  | 0 | 2.663872  | 3.164139  | -0.455816 |
| 47 | 1  | 0 | 1.860770  | 4.739121  | -0.353265 |
| 48 | 17 | 0 | 0.027051  | -2.690259 | 0.357596  |
| 49 | 17 | 0 | 0.404440  | 0.317224  | 2.348116  |

---

## Alkene metathesis-First generation Grubbs catalyst

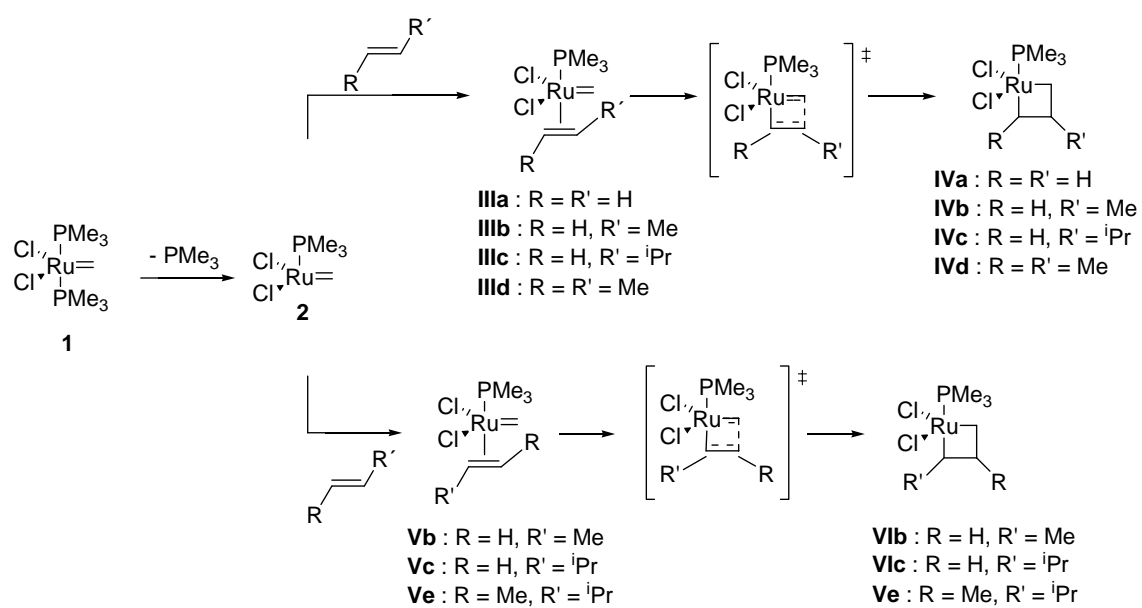

Relative energies for the stationary points involved in dissociative pathways

$\Delta G$  (kcal mol<sup>-1</sup>)

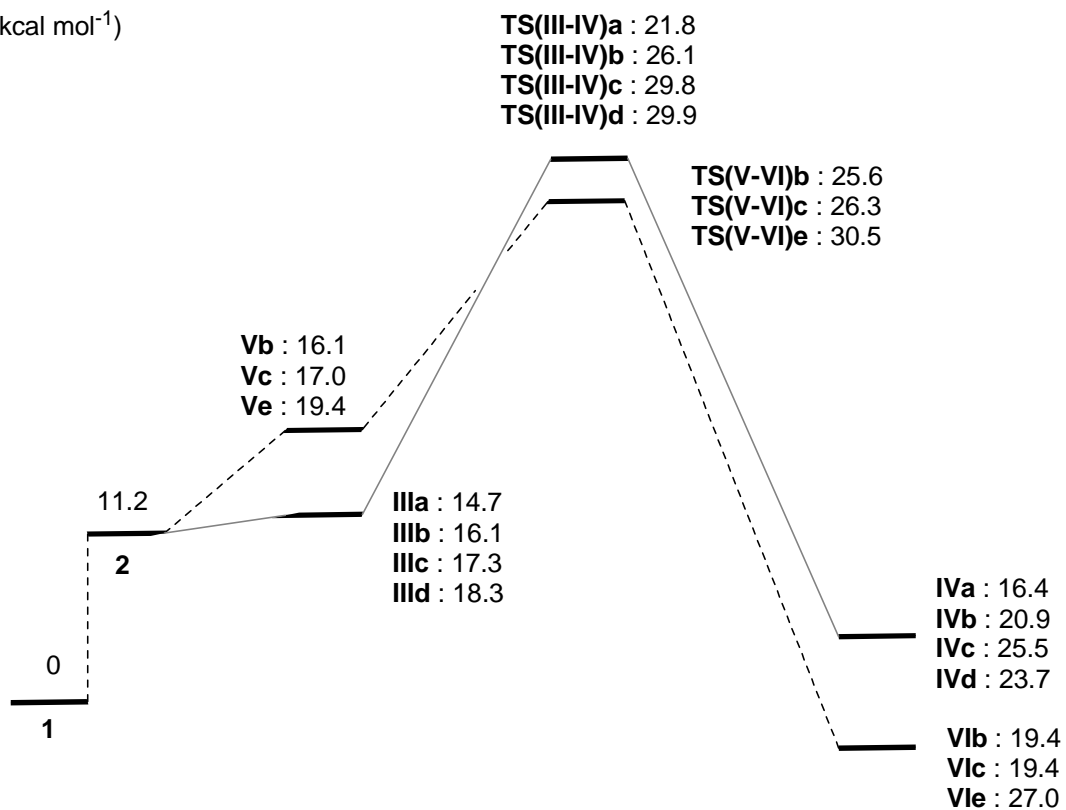

Relative energies for the stationary points involved in dissociative pathways

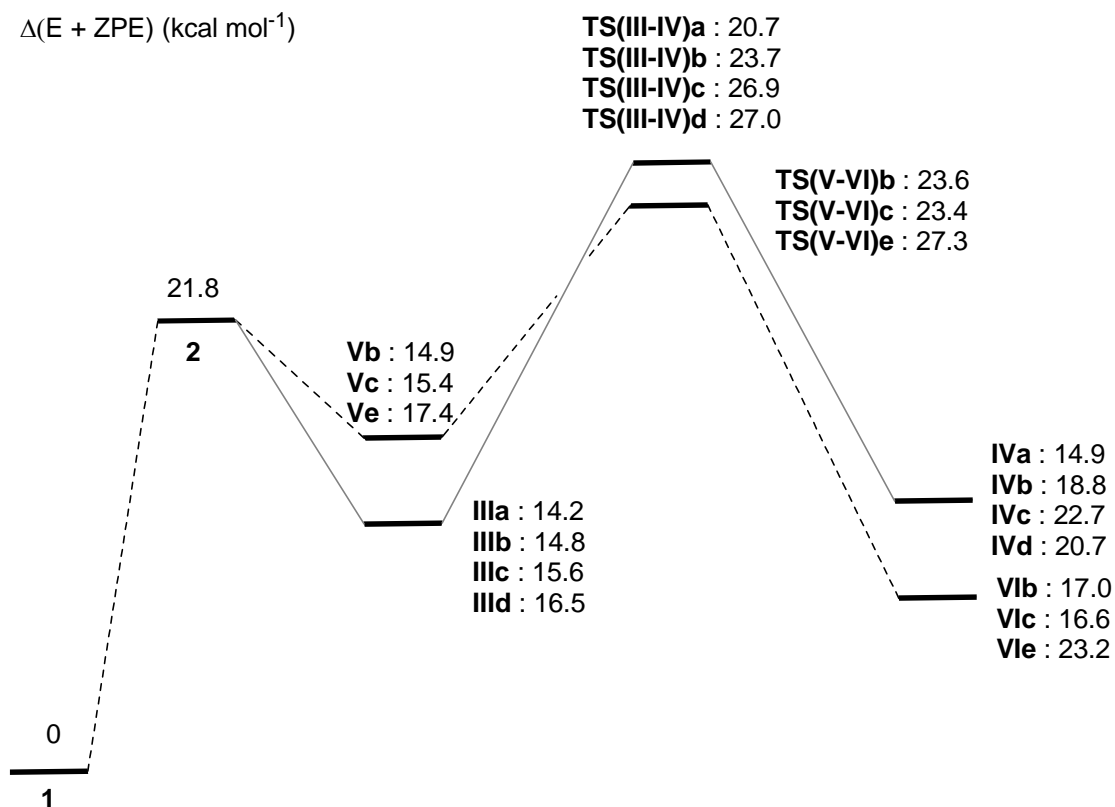

### Alkene metathesis-Second generation Grubbs catalyst

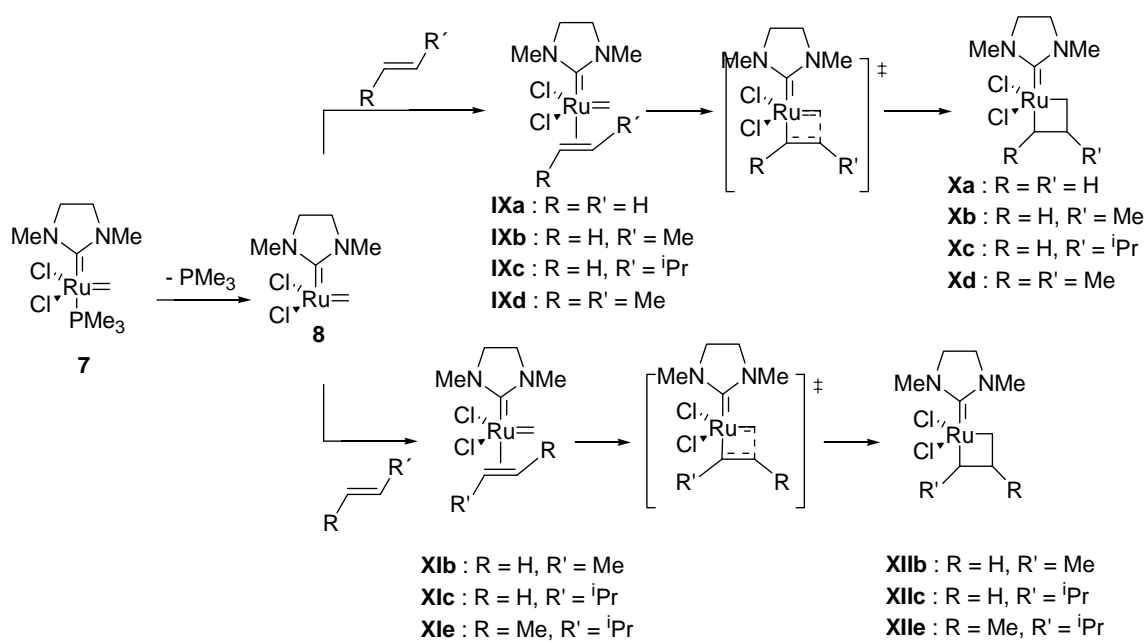

Relative energies for the stationary points involved in dissociative pathways

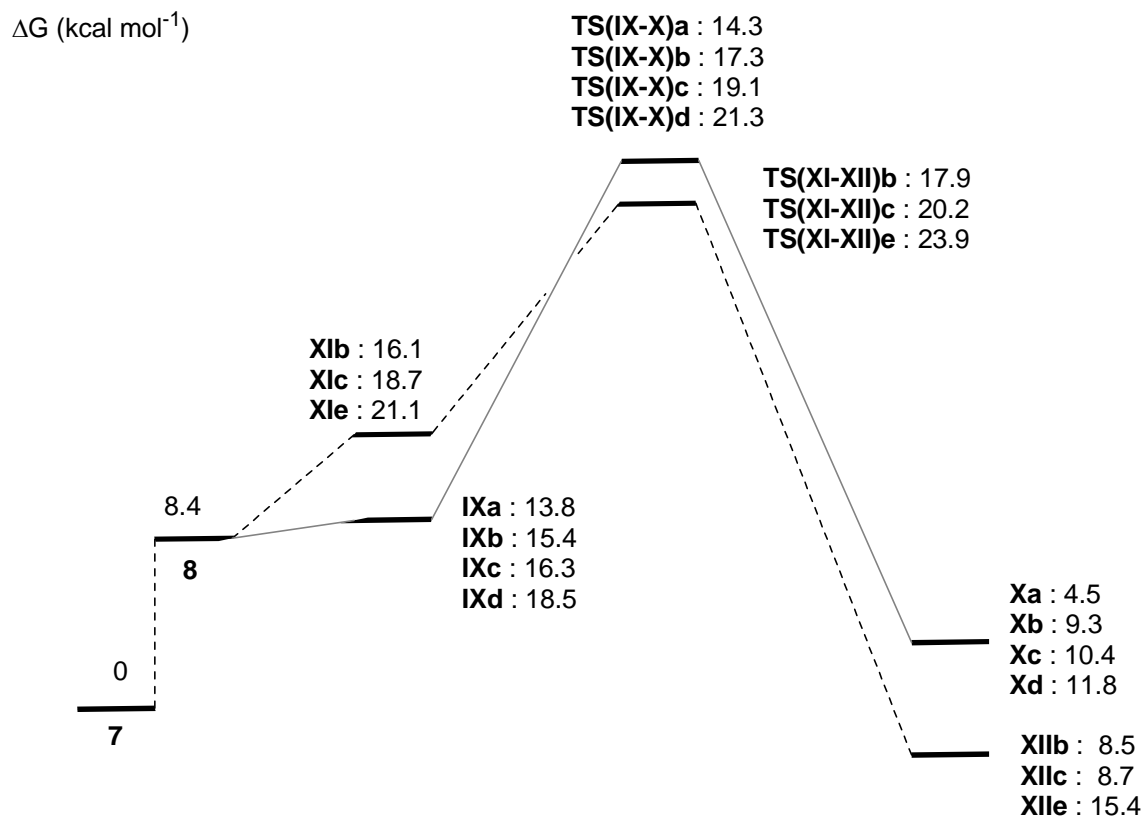

Relative energies for the stationary points involved in dissociative pathways

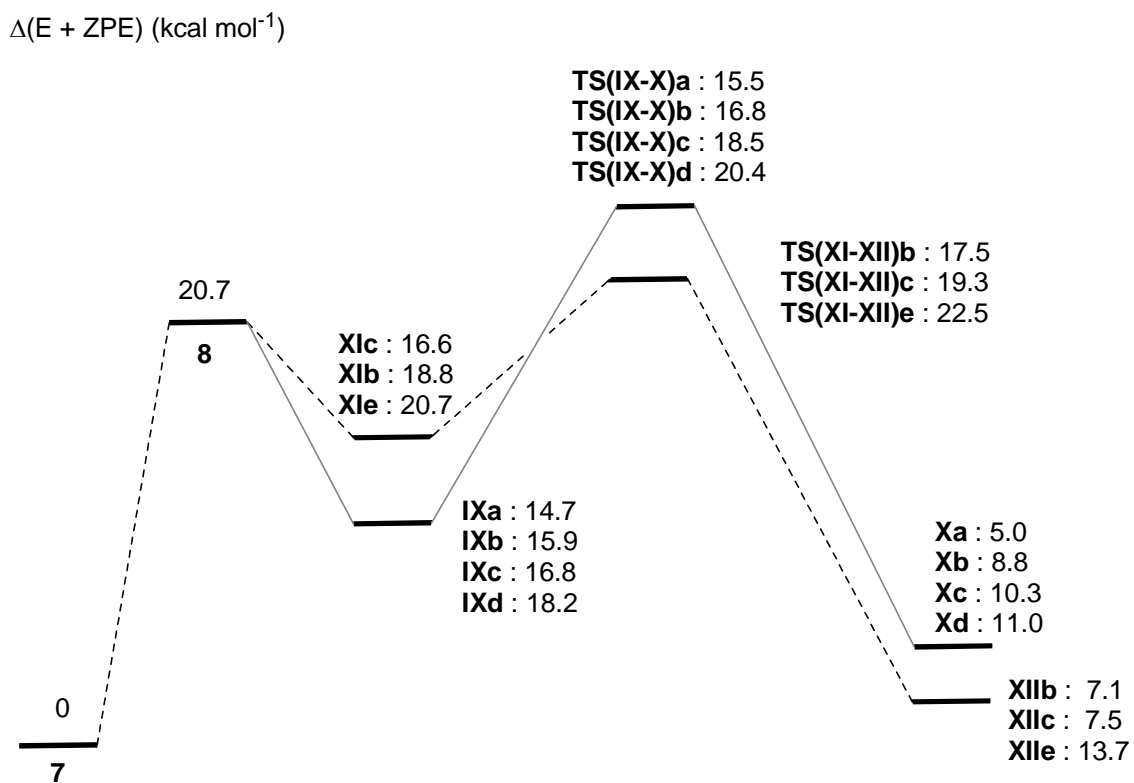

Ethene

Zero-point correction= 0.051236  
 (Hartree/Particle)  
 Thermal correction to Energy= 0.054278  
 Thermal correction to Enthalpy= 0.055222  
 Thermal correction to Gibbs Free Energy= 0.029052  
 Sum of electronic and zero-point Energies= -78.534588  
 Sum of electronic and thermal Energies= -78.531546  
 Sum of electronic and thermal Enthalpies= -78.530602  
 Sum of electronic and thermal Free Energies= -78.556773

| Center<br>Number | Atomic<br>Number | Atomic<br>Type | Coordinates (Angstroms) |           |           |
|------------------|------------------|----------------|-------------------------|-----------|-----------|
|                  |                  |                | X                       | Y         | Z         |
| 1                | 6                | 0              | 0.665624                | -0.000000 | -0.000296 |
| 2                | 6                | 0              | -0.665624               | 0.000000  | -0.000296 |
| 3                | 1                | 0              | 1.239931                | 0.923524  | 0.000897  |
| 4                | 1                | 0              | 1.239929                | -0.923526 | 0.000880  |
| 5                | 1                | 0              | -1.239932               | -0.923524 | 0.000897  |
| 6                | 1                | 0              | -1.239929               | 0.923526  | 0.000880  |

### 1-propene

Zero-point correction= 0.080096  
 (Hartree/Particle)  
 Thermal correction to Energy= 0.084172  
 Thermal correction to Enthalpy= 0.085116  
 Thermal correction to Gibbs Free Energy= 0.055095  
 Sum of electronic and zero-point Energies= -117.825117  
 Sum of electronic and thermal Energies= -117.821042  
 Sum of electronic and thermal Enthalpies= -117.820097  
 Sum of electronic and thermal Free Energies= -117.850118

| Center<br>Number | Atomic<br>Number | Atomic<br>Type | Coordinates (Angstroms) |           |           |
|------------------|------------------|----------------|-------------------------|-----------|-----------|
|                  |                  |                | X                       | Y         | Z         |
| 1                | 6                | 0              | -1.283228               | 0.220541  | -0.000088 |
| 2                | 6                | 0              | -0.133820               | -0.455881 | -0.000213 |
| 3                | 6                | 0              | 1.235103                | 0.162992  | 0.000044  |
| 4                | 1                | 0              | -2.245576               | -0.284532 | 0.000723  |
| 5                | 1                | 0              | -1.305246               | 1.308809  | 0.000071  |
| 6                | 1                | 0              | -0.163921               | -1.546608 | 0.000302  |
| 7                | 1                | 0              | 1.811749                | -0.148580 | 0.881705  |
| 8                | 1                | 0              | 1.181217                | 1.256954  | -0.002016 |
| 9                | 1                | 0              | 1.813445                | -0.151958 | -0.879243 |

### 3-methyl-1-butene

Zero-point correction= 0.137322  
 (Hartree/Particle)  
 Thermal correction to Energy= 0.143842  
 Thermal correction to Enthalpy= 0.144787  
 Thermal correction to Gibbs Free Energy= 0.107910  
 Sum of electronic and zero-point Energies= -196.394462  
 Sum of electronic and thermal Energies= -196.387942  
 Sum of electronic and thermal Enthalpies= -196.386998

Sum of electronic and thermal Free Energies= -196.423874

| Center<br>Number | Atomic<br>Number | Atomic<br>Type | Coordinates (Angstroms) |           |           |
|------------------|------------------|----------------|-------------------------|-----------|-----------|
|                  |                  |                | X                       | Y         | Z         |
| 1                | 6                | 0              | 2.153959                | 0.000007  | -0.161975 |
| 2                | 6                | 0              | 0.951908                | -0.000005 | 0.415537  |
| 3                | 6                | 0              | -0.371777               | -0.000008 | -0.309485 |
| 4                | 6                | 0              | -1.178669               | 1.268190  | 0.028209  |
| 5                | 6                | 0              | -1.178724               | -1.268149 | 0.028159  |
| 6                | 1                | 0              | 3.071314                | -0.000162 | 0.421127  |
| 7                | 1                | 0              | 2.267682                | 0.000093  | -1.244620 |
| 8                | 1                | 0              | 0.886368                | -0.000221 | 1.506479  |
| 9                | 1                | 0              | -0.167896               | 0.000031  | -1.389594 |
| 10               | 1                | 0              | -2.138278               | 1.274390  | -0.502766 |
| 11               | 1                | 0              | -0.627700               | 2.173545  | -0.248724 |
| 12               | 1                | 0              | -1.392724               | 1.321516  | 1.103544  |
| 13               | 1                | 0              | -2.138230               | -1.274423 | -0.503004 |
| 14               | 1                | 0              | -1.393015               | -1.321435 | 1.103450  |
| 15               | 1                | 0              | -0.627699               | -2.173539 | -0.248558 |

## 2-butene

Zero-point correction= 0.108557  
(Hartree/Particle)  
Thermal correction to Energy= 0.114011  
Thermal correction to Enthalpy= 0.114955  
Thermal correction to Gibbs Free Energy= 0.081180  
Sum of electronic and zero-point Energies= -157.115314  
Sum of electronic and thermal Energies= -157.109860  
Sum of electronic and thermal Enthalpies= -157.108916  
Sum of electronic and thermal Free Energies= -157.142690

| Center<br>Number | Atomic<br>Number | Atomic<br>Type | Coordinates (Angstroms) |           |           |
|------------------|------------------|----------------|-------------------------|-----------|-----------|
|                  |                  |                | X                       | Y         | Z         |
| 1                | 6                | 0              | -0.538159               | 0.395571  | -0.000033 |
| 2                | 6                | 0              | 0.538153                | -0.395530 | 0.000025  |
| 3                | 6                | 0              | 1.963799                | 0.079239  | 0.000004  |
| 4                | 6                | 0              | -1.963794               | -0.079266 | 0.000011  |
| 5                | 1                | 0              | -0.392426               | 1.477906  | 0.000019  |
| 6                | 1                | 0              | 0.392390                | -1.477862 | -0.000079 |
| 7                | 1                | 0              | 2.508205                | -0.289037 | 0.880508  |
| 8                | 1                | 0              | 2.022922                | 1.173232  | -0.000037 |
| 9                | 1                | 0              | 2.508177                | -0.289122 | -0.880477 |
| 10               | 1                | 0              | -2.508232               | 0.289059  | 0.880474  |
| 11               | 1                | 0              | -2.022846               | -1.173262 | 0.000057  |
| 12               | 1                | 0              | -2.508183               | 0.289003  | -0.880502 |

## 4-methyl-2-pentene

Zero-point correction= 0.165600  
(Hartree/Particle)



Thermal correction to Energy= 0.173614  
 Thermal correction to Enthalpy= 0.174558  
 Thermal correction to Gibbs Free Energy= 0.133946  
 Sum of electronic and zero-point Energies= -235.684795  
 Sum of electronic and thermal Energies= -235.676781  
 Sum of electronic and thermal Enthalpies= -235.675837  
 Sum of electronic and thermal Free Energies= -235.716449

| Center<br>Number | Atomic<br>Number | Atomic<br>Type | Coordinates (Angstroms) |           |           |
|------------------|------------------|----------------|-------------------------|-----------|-----------|
|                  |                  |                | X                       | Y         | Z         |
| 1                | 6                | 0              | -0.373811               | -0.000381 | 0.271949  |
| 2                | 6                | 0              | -1.515133               | 0.000411  | -0.421997 |
| 3                | 6                | 0              | 1.015100                | 0.000022  | -0.318710 |
| 4                | 6                | 0              | 1.787776                | 1.267512  | 0.094522  |
| 5                | 6                | 0              | 1.788094                | -1.267334 | 0.094036  |
| 6                | 6                | 0              | -2.894666               | -0.000164 | 0.174398  |
| 7                | 1                | 0              | -0.420147               | -0.001415 | 1.364762  |
| 8                | 1                | 0              | -1.464811               | 0.001360  | -1.512986 |
| 9                | 1                | 0              | 0.919605                | 0.000319  | -1.413937 |
| 10               | 1                | 0              | 1.897653                | 1.320596  | 1.185483  |
| 11               | 1                | 0              | 1.266301                | 2.173413  | -0.233274 |
| 12               | 1                | 0              | 2.794177                | 1.273681  | -0.341723 |
| 13               | 1                | 0              | 1.266850                | -2.173365 | -0.233812 |
| 14               | 1                | 0              | 1.898233                | -1.320624 | 1.184970  |
| 15               | 1                | 0              | 2.794437                | -1.273303 | -0.342373 |
| 16               | 1                | 0              | -2.858993               | -0.000845 | 1.269337  |
| 17               | 1                | 0              | -3.468493               | -0.880564 | -0.146416 |
| 18               | 1                | 0              | -3.468973               | 0.880349  | -0.145219 |

### IIIa

Zero-point correction= 0.196986  
 (Hartree/Particle)  
 Thermal correction to Energy= 0.214483  
 Thermal correction to Enthalpy= 0.215427  
 Thermal correction to Gibbs Free Energy= 0.151443  
 Sum of electronic and zero-point Energies= -1593.158024  
 Sum of electronic and thermal Energies= -1593.140527  
 Sum of electronic and thermal Enthalpies= -1593.139583  
 Sum of electronic and thermal Free Energies= -1593.203567

| Center<br>Number | Atomic<br>Number | Atomic<br>Type | Coordinates (Angstroms) |           |           |
|------------------|------------------|----------------|-------------------------|-----------|-----------|
|                  |                  |                | X                       | Y         | Z         |
| 1                | 17               | 0              | 0.626081                | -2.275166 | -0.553060 |
| 2                | 44               | 0              | 0.553657                | 0.016194  | 0.130212  |
| 3                | 6                | 0              | 2.930480                | 0.119289  | -0.747073 |
| 4                | 17               | 0              | 0.510034                | 2.321291  | -0.517793 |
| 5                | 15               | 0              | -1.764140               | -0.030469 | -0.009677 |
| 6                | 6                | 0              | -2.298099               | -0.032836 | -1.770515 |
| 7                | 6                | 0              | -2.652472               | 1.396278  | 0.741191  |
| 8                | 6                | 0              | -2.585766               | -1.505110 | 0.724237  |
| 9                | 6                | 0              | 3.069137                | -0.100056 | 0.579375  |
| 10               | 6                | 0              | 0.465952                | 0.013899  | 1.958460  |
| 11               | 1                | 0              | 2.868550                | -0.709254 | -1.446962 |
| 12               | 1                | 0              | 2.952799                | 1.123795  | -1.156958 |
| 13               | 1                | 0              | -3.390428               | -0.060594 | -1.852516 |

|    |   |   |           |           |           |
|----|---|---|-----------|-----------|-----------|
| 14 | 1 | 0 | -1.873049 | -0.908690 | -2.269375 |
| 15 | 1 | 0 | -1.918797 | 0.870000  | -2.257925 |
| 16 | 1 | 0 | -2.267729 | 2.320111  | 0.302814  |
| 17 | 1 | 0 | -2.462327 | 1.424807  | 1.818567  |
| 18 | 1 | 0 | -3.732077 | 1.319379  | 0.572184  |
| 19 | 1 | 0 | -2.150880 | -2.405589 | 0.284200  |
| 20 | 1 | 0 | -3.666198 | -1.481699 | 0.544944  |
| 21 | 1 | 0 | -2.404794 | -1.530314 | 1.803271  |
| 22 | 1 | 0 | 3.220364  | 0.726372  | 1.268111  |
| 23 | 1 | 0 | 3.126383  | -1.107063 | 0.981590  |
| 24 | 1 | 0 | 1.372618  | 0.017932  | 2.572068  |
| 25 | 1 | 0 | -0.462582 | 0.012390  | 2.542257  |

### IIIb

Zero-point correction= 0.225666  
(Hartree/Particle)  
Thermal correction to Energy= 0.244545  
Thermal correction to Enthalpy= 0.245489  
Thermal correction to Gibbs Free Energy= 0.178699  
Sum of electronic and zero-point Energies= -1632.447607  
Sum of electronic and thermal Energies= -1632.428728  
Sum of electronic and thermal Enthalpies= -1632.427784  
Sum of electronic and thermal Free Energies= -1632.494575

| Center<br>Number | Atomic<br>Number | Atomic<br>Type | Coordinates (Angstroms) |           |           |
|------------------|------------------|----------------|-------------------------|-----------|-----------|
|                  |                  |                | X                       | Y         | Z         |
| 1                | 17               | 0              | 0.025428                | 2.428512  | -0.451300 |
| 2                | 44               | 0              | -0.335928               | 0.107538  | 0.023939  |
| 3                | 6                | 0              | -2.598634               | 0.503361  | -1.089371 |
| 4                | 17               | 0              | -0.592706               | -2.121847 | -0.809274 |
| 5                | 15               | 0              | 1.951141                | -0.203008 | 0.109840  |
| 6                | 6                | 0              | 2.662284                | -0.147428 | -1.585689 |
| 7                | 6                | 0              | 2.534153                | -1.807847 | 0.800286  |
| 8                | 6                | 0              | 2.909569                | 1.056580  | 1.051064  |
| 9                | 6                | 0              | -3.017632               | 0.489510  | 0.197021  |
| 10               | 6                | 0              | -0.450329               | 0.001441  | 1.843022  |
| 11               | 6                | 0              | -3.682889               | -0.681115 | 0.861817  |
| 12               | 1                | 0              | -2.271583               | 1.424444  | -1.560880 |
| 13               | 1                | 0              | -2.687498               | -0.380735 | -1.714762 |
| 14               | 1                | 0              | 3.748672                | -0.287796 | -1.562743 |
| 15               | 1                | 0              | 2.427545                | 0.821704  | -2.035354 |
| 16               | 1                | 0              | 2.204737                | -0.937107 | -2.188705 |
| 17               | 1                | 0              | 2.055791                | -2.622738 | 0.251885  |
| 18               | 1                | 0              | 2.243562                | -1.886471 | 1.852533  |
| 19               | 1                | 0              | 3.624004                | -1.891428 | 0.724722  |
| 20               | 1                | 0              | 2.675960                | 2.047243  | 0.654130  |
| 21               | 1                | 0              | 3.985384                | 0.864232  | 0.974757  |
| 22               | 1                | 0              | 2.618145                | 1.032810  | 2.105755  |
| 23               | 1                | 0              | -2.970609               | 1.420120  | 0.762637  |
| 24               | 1                | 0              | -1.420016               | 0.089977  | 2.344230  |
| 25               | 1                | 0              | 0.391398                | -0.147436 | 2.530369  |
| 26               | 1                | 0              | -3.293858               | -0.858091 | 1.871701  |
| 27               | 1                | 0              | -3.555776               | -1.596459 | 0.277812  |
| 28               | 1                | 0              | -4.757530               | -0.479154 | 0.971848  |

### IIIc

Zero-point correction= 0.282788  
(Hartree/Particle)  
Thermal correction to Energy= 0.304257  
Thermal correction to Enthalpy= 0.305201  
Thermal correction to Gibbs Free Energy= 0.232050  
Sum of electronic and zero-point Energies= -1711.015678  
Sum of electronic and thermal Energies= -1710.994209  
Sum of electronic and thermal Enthalpies= -1710.993264  
Sum of electronic and thermal Free Energies= -1711.066415

---

| Center<br>Number | Atomic<br>Number | Atomic<br>Type | Coordinates (Angstroms) |           |           |
|------------------|------------------|----------------|-------------------------|-----------|-----------|
|                  |                  |                | X                       | Y         | Z         |
| 1                | 17               | 0              | 0.438890                | 2.393583  | -0.617985 |
| 2                | 44               | 0              | 0.139889                | 0.083023  | -0.063038 |
| 3                | 6                | 0              | -2.023225               | 0.238002  | -1.430485 |
| 4                | 17               | 0              | 0.098560                | -2.193167 | -0.817409 |
| 5                | 15               | 0              | 2.411479                | -0.120578 | 0.267360  |
| 6                | 6                | 0              | 3.293459                | -0.165023 | -1.346667 |
| 7                | 6                | 0              | 2.971288                | -1.642500 | 1.138758  |
| 8                | 6                | 0              | 3.223550                | 1.245751  | 1.196902  |
| 9                | 6                | 0              | -2.569815               | 0.706938  | -0.285545 |
| 10               | 6                | 0              | -0.162986               | 0.015913  | 1.732803  |
| 11               | 6                | 0              | -3.528368               | -0.028523 | 0.621610  |
| 12               | 6                | 0              | -3.725165               | -1.509190 | 0.275988  |
| 13               | 6                | 0              | -4.874971               | 0.729889  | 0.635396  |
| 14               | 1                | 0              | -1.497524               | 0.911429  | -2.102322 |
| 15               | 1                | 0              | -2.192720               | -0.774060 | -1.780775 |
| 16               | 1                | 0              | 4.375006                | -0.266225 | -1.202721 |
| 17               | 1                | 0              | 3.083933                | 0.759417  | -1.892686 |
| 18               | 1                | 0              | 2.920942                | -1.012239 | -1.929581 |
| 19               | 1                | 0              | 2.584724                | -2.514551 | 0.606343  |
| 20               | 1                | 0              | 2.568585                | -1.656074 | 2.156238  |
| 21               | 1                | 0              | 4.064820                | -1.684104 | 1.188499  |
| 22               | 1                | 0              | 3.003620                | 2.192348  | 0.697929  |
| 23               | 1                | 0              | 4.306735                | 1.090008  | 1.250056  |
| 24               | 1                | 0              | 2.820094                | 1.293681  | 2.212999  |
| 25               | 1                | 0              | -2.394290               | 1.751978  | -0.030875 |
| 26               | 1                | 0              | -1.189142               | 0.081538  | 2.111927  |
| 27               | 1                | 0              | 0.596404                | -0.096910 | 2.516263  |
| 28               | 1                | 0              | -3.130510               | 0.033289  | 1.647470  |
| 29               | 1                | 0              | -2.774561               | -2.051839 | 0.258505  |
| 30               | 1                | 0              | -4.199473               | -1.625207 | -0.706041 |
| 31               | 1                | 0              | -4.379575               | -1.984395 | 1.015415  |
| 32               | 1                | 0              | -5.344840               | 0.703599  | -0.354704 |
| 33               | 1                | 0              | -4.743940               | 1.780510  | 0.919106  |
| 34               | 1                | 0              | -5.564857               | 0.268881  | 1.351373  |

---

### IIIId

Zero-point correction= 0.253870  
(Hartree/Particle)  
Thermal correction to Energy= 0.274287  
Thermal correction to Enthalpy= 0.275231  
Thermal correction to Gibbs Free Energy= 0.205161  
Sum of electronic and zero-point Energies= -1671.735023

Sum of electronic and thermal Energies= -1671.714606  
 Sum of electronic and thermal Enthalpies= -1671.713662  
 Sum of electronic and thermal Free Energies= -1671.783732

| Center Number | Atomic Number | Atomic Type | Coordinates (Angstroms) |           |           |
|---------------|---------------|-------------|-------------------------|-----------|-----------|
|               |               |             | X                       | Y         | Z         |
| 1             | 17            | 0           | -0.264061               | -2.205362 | 0.768443  |
| 2             | 44            | 0           | -0.210395               | 0.010871  | -0.153069 |
| 3             | 17            | 0           | -0.066560               | 2.379089  | 0.253657  |
| 4             | 15            | 0           | 2.094786                | -0.064824 | -0.037033 |
| 5             | 6             | 0           | 2.677427                | 0.094419  | 1.700669  |
| 6             | 6             | 0           | 2.998648                | 1.256303  | -0.947164 |
| 7             | 6             | 0           | 2.875061                | -1.618683 | -0.643176 |
| 8             | 6             | 0           | -0.162590               | -0.145990 | -1.966174 |
| 9             | 1             | 0           | 3.771041                | 0.052914  | 1.755460  |
| 10            | 1             | 0           | 2.250732                | -0.720253 | 2.292852  |
| 11            | 1             | 0           | 2.328306                | 1.048251  | 2.106589  |
| 12            | 1             | 0           | 2.639995                | 2.230010  | -0.606411 |
| 13            | 1             | 0           | 2.794823                | 1.172171  | -2.019113 |
| 14            | 1             | 0           | 4.078489                | 1.172006  | -0.782449 |
| 15            | 1             | 0           | 2.451603                | -2.465214 | -0.098324 |
| 16            | 1             | 0           | 3.961645                | -1.587368 | -0.506967 |
| 17            | 1             | 0           | 2.653210                | -1.750614 | -1.706613 |
| 18            | 1             | 0           | -1.100960               | -0.161656 | -2.529679 |
| 19            | 1             | 0           | 0.737755                | -0.214546 | -2.589372 |
| 20            | 6             | 0           | -2.685961               | 0.546105  | 0.575362  |
| 21            | 6             | 0           | -2.930728               | -0.478195 | -0.277167 |
| 22            | 6             | 0           | -3.474374               | -0.317395 | -1.668503 |
| 23            | 6             | 0           | -2.491236               | 0.400466  | 2.063110  |
| 24            | 1             | 0           | -2.789734               | 1.565630  | 0.207101  |
| 25            | 1             | 0           | -2.871812               | -1.496476 | 0.102734  |
| 26            | 1             | 0           | -3.002804               | -1.006209 | -2.379230 |
| 27            | 1             | 0           | -3.364620               | 0.707812  | -2.038048 |
| 28            | 1             | 0           | -4.546232               | -0.560333 | -1.670286 |
| 29            | 1             | 0           | -1.684960               | 1.046811  | 2.427579  |
| 30            | 1             | 0           | -2.279994               | -0.634174 | 2.347415  |
| 31            | 1             | 0           | -3.407799               | 0.719750  | 2.579839  |

**TS (III-IV) a**

Zero-point correction= 0.198069  
 (Hartree/Particle)  
 Thermal correction to Energy= 0.214360  
 Thermal correction to Enthalpy= 0.215304  
 Thermal correction to Gibbs Free Energy= 0.153487  
 Sum of electronic and zero-point Energies= -1593.147655  
 Sum of electronic and thermal Energies= -1593.131364  
 Sum of electronic and thermal Enthalpies= -1593.130420  
 Sum of electronic and thermal Free Energies= -1593.192238

| Center Number | Atomic Number | Atomic Type | Coordinates (Angstroms) |           |           |
|---------------|---------------|-------------|-------------------------|-----------|-----------|
|               |               |             | X                       | Y         | Z         |
| 1             | 17            | 0           | 0.423164                | -2.438917 | -0.156019 |
| 2             | 44            | 0           | 0.560660                | 0.002321  | -0.022544 |
| 3             | 6             | 0           | 2.479457                | -0.101851 | -1.084565 |
| 4             | 17            | 0           | 0.685619                | 2.432926  | -0.162587 |
| 5             | 15            | 0           | -1.822675               | 0.063366  | 0.009557  |

|    |   |   |           |           |           |
|----|---|---|-----------|-----------|-----------|
| 6  | 6 | 0 | -2.421589 | -0.358365 | -1.681571 |
| 7  | 6 | 0 | -2.637044 | 1.658527  | 0.420921  |
| 8  | 6 | 0 | -2.624708 | -1.172211 | 1.109509  |
| 9  | 6 | 0 | 2.925956  | -0.126363 | 0.246892  |
| 10 | 6 | 0 | 1.234891  | -0.024757 | 1.695386  |
| 11 | 1 | 0 | 2.432516  | -1.035055 | -1.639234 |
| 12 | 1 | 0 | 2.536955  | 0.830005  | -1.640260 |
| 13 | 1 | 0 | -3.516672 | -0.361970 | -1.717293 |
| 14 | 1 | 0 | -2.041330 | -1.348081 | -1.950046 |
| 15 | 1 | 0 | -2.045282 | 0.375101  | -2.401678 |
| 16 | 1 | 0 | -2.229503 | 2.443488  | -0.219980 |
| 17 | 1 | 0 | -2.405499 | 1.924818  | 1.456284  |
| 18 | 1 | 0 | -3.723311 | 1.585723  | 0.296752  |
| 19 | 1 | 0 | -2.201302 | -2.156079 | 0.893447  |
| 20 | 1 | 0 | -3.709997 | -1.180311 | 0.959195  |
| 21 | 1 | 0 | -2.409175 | -0.922001 | 2.152776  |
| 22 | 1 | 0 | 3.329828  | 0.782727  | 0.681826  |
| 23 | 1 | 0 | 3.222929  | -1.074966 | 0.683452  |
| 24 | 1 | 0 | 1.470297  | 0.901154  | 2.230236  |
| 25 | 1 | 0 | 1.369543  | -0.965204 | 2.240001  |

### TS (III-IV) b

|                                              |              |
|----------------------------------------------|--------------|
| Zero-point correction=                       | 0.227121     |
| (Hartree/Particle)                           |              |
| Thermal correction to Energy=                | 0.244503     |
| Thermal correction to Enthalpy=              | 0.245447     |
| Thermal correction to Gibbs Free Energy=     | 0.181816     |
| Sum of electronic and zero-point Energies=   | -1632.433353 |
| Sum of electronic and thermal Energies=      | -1632.415971 |
| Sum of electronic and thermal Enthalpies=    | -1632.415026 |
| Sum of electronic and thermal Free Energies= | -1632.478658 |

| Center<br>Number | Atomic<br>Number | Atomic<br>Type | Coordinates (Angstroms) |           |           |
|------------------|------------------|----------------|-------------------------|-----------|-----------|
|                  |                  |                | X                       | Y         | Z         |
| 1                | 17               | 0              | -0.107620               | -2.493899 | -0.131345 |
| 2                | 44               | 0              | 0.347839                | -0.082933 | -0.073804 |
| 3                | 6                | 0              | 2.088667                | -0.461933 | -1.265220 |
| 4                | 17               | 0              | 0.719768                | 2.318741  | -0.260455 |
| 5                | 15               | 0              | -2.020784               | 0.249893  | 0.073026  |
| 6                | 6                | 0              | -2.788673               | -0.240886 | -1.528217 |
| 7                | 6                | 0              | -2.644212               | 1.948616  | 0.396952  |
| 8                | 6                | 0              | -2.848795               | -0.801109 | 1.334162  |
| 9                | 6                | 0              | 2.699587                | -0.550071 | 0.022987  |
| 10               | 6                | 0              | 1.239712                | -0.234312 | 1.543204  |
| 11               | 6                | 0              | 3.721430                | 0.486554  | 0.447492  |
| 12               | 1                | 0              | 1.867530                | -1.385585 | -1.793539 |
| 13               | 1                | 0              | 2.285472                | 0.426814  | -1.862171 |
| 14               | 1                | 0              | -3.878549               | -0.136273 | -1.485719 |
| 15               | 1                | 0              | -2.524783               | -1.281209 | -1.737504 |
| 16               | 1                | 0              | -2.402354               | 0.392735  | -2.332884 |
| 17               | 1                | 0              | -2.236839               | 2.631286  | -0.352010 |
| 18               | 1                | 0              | -2.288096               | 2.284213  | 1.374857  |
| 19               | 1                | 0              | -3.739645               | 1.970418  | 0.377964  |
| 20               | 1                | 0              | -2.539718               | -1.837242 | 1.177676  |
| 21               | 1                | 0              | -3.938262               | -0.710908 | 1.259908  |
| 22               | 1                | 0              | -2.530121               | -0.487734 | 2.332935  |
| 23               | 1                | 0              | 2.835753                | -1.565589 | 0.390495  |

|    |   |   |          |           |           |
|----|---|---|----------|-----------|-----------|
| 24 | 1 | 0 | 1.629747 | 0.651457  | 2.051941  |
| 25 | 1 | 0 | 1.280399 | -1.182677 | 2.087505  |
| 26 | 1 | 0 | 3.987838 | 0.399323  | 1.504487  |
| 27 | 1 | 0 | 3.350260 | 1.496105  | 0.250941  |
| 28 | 1 | 0 | 4.635406 | 0.332019  | -0.140441 |

---

### TS (III-IV) c

|                                              |              |
|----------------------------------------------|--------------|
| Zero-point correction=                       | 0.284099     |
| (Hartree/Particle)                           |              |
| Thermal correction to Energy=                | 0.304199     |
| Thermal correction to Enthalpy=              | 0.305143     |
| Thermal correction to Gibbs Free Energy=     | 0.235129     |
| Sum of electronic and zero-point Energies=   | -1710.997563 |
| Sum of electronic and thermal Energies=      | -1710.977463 |
| Sum of electronic and thermal Enthalpies=    | -1710.976518 |
| Sum of electronic and thermal Free Energies= | -1711.046533 |

---

| Center<br>Number | Atomic<br>Number | Atomic<br>Type | Coordinates (Angstroms) |           |           |
|------------------|------------------|----------------|-------------------------|-----------|-----------|
|                  |                  |                | X                       | Y         | Z         |
| 1                | 17               | 0              | 0.408991                | 2.573217  | -0.131882 |
| 2                | 44               | 0              | 0.102143                | 0.152901  | -0.084340 |
| 3                | 6                | 0              | -1.644648               | 0.347094  | -1.302085 |
| 4                | 17               | 0              | -0.031295               | -2.290916 | -0.304564 |
| 5                | 15               | 0              | 2.471993                | -0.186920 | 0.098507  |
| 6                | 6                | 0              | 3.116552                | -0.787868 | -1.519012 |
| 7                | 6                | 0              | 2.969557                | -1.474579 | 1.313250  |
| 8                | 6                | 0              | 3.517759                | 1.267515  | 0.511454  |
| 9                | 6                | 0              | -2.234949               | 0.654490  | -0.030198 |
| 10               | 6                | 0              | -0.872442               | 0.235484  | 1.491966  |
| 11               | 6                | 0              | -3.466498               | -0.089463 | 0.514191  |
| 12               | 6                | 0              | -3.526438               | -1.592256 | 0.219955  |
| 13               | 6                | 0              | -4.705354               | 0.631659  | -0.063178 |
| 14               | 1                | 0              | -1.400546               | 1.184411  | -1.952635 |
| 15               | 1                | 0              | -1.879234               | -0.599574 | -1.781072 |
| 16               | 1                | 0              | 4.191328                | -0.991722 | -1.456115 |
| 17               | 1                | 0              | 2.943681                | -0.030966 | -2.290695 |
| 18               | 1                | 0              | 2.579759                | -1.701194 | -1.789269 |
| 19               | 1                | 0              | 2.402265                | -2.384535 | 1.105028  |
| 20               | 1                | 0              | 2.726875                | -1.132467 | 2.323902  |
| 21               | 1                | 0              | 4.045706                | -1.671065 | 1.249370  |
| 22               | 1                | 0              | 3.316958                | 2.070729  | -0.200766 |
| 23               | 1                | 0              | 4.579579                | 0.997017  | 0.493841  |
| 24               | 1                | 0              | 3.250362                | 1.636001  | 1.505701  |
| 25               | 1                | 0              | -2.236652               | 1.719639  | 0.195794  |
| 26               | 1                | 0              | -1.249576               | -0.676199 | 1.963009  |
| 27               | 1                | 0              | -0.955704               | 1.162458  | 2.066992  |
| 28               | 1                | 0              | -3.496996               | 0.052106  | 1.601949  |
| 29               | 1                | 0              | -2.633917               | -2.120767 | 0.562959  |
| 30               | 1                | 0              | -3.627341               | -1.785546 | -0.853921 |
| 31               | 1                | 0              | -4.403749               | -2.024623 | 0.714677  |
| 32               | 1                | 0              | -4.748190               | 0.522013  | -1.153153 |
| 33               | 1                | 0              | -4.701963               | 1.702222  | 0.171291  |
| 34               | 1                | 0              | -5.618906               | 0.196650  | 0.357989  |

---

### TS (III-IV) d

Zero-point correction= 0.255149  
 (Hartree/Particle)  
 Thermal correction to Energy= 0.274083  
 Thermal correction to Enthalpy= 0.275027  
 Thermal correction to Gibbs Free Energy= 0.208317  
 Sum of electronic and zero-point Energies= -1671.718353  
 Sum of electronic and thermal Energies= -1671.699419  
 Sum of electronic and thermal Enthalpies= -1671.698475  
 Sum of electronic and thermal Free Energies= -1671.765185

| Center<br>Number | Atomic<br>Number | Atomic<br>Type | Coordinates (Angstroms) |           |           |
|------------------|------------------|----------------|-------------------------|-----------|-----------|
|                  |                  |                | X                       | Y         | Z         |
| 1                | 17               | 0              | 0.044386                | -2.404435 | -0.419875 |
| 2                | 44               | 0              | -0.250426               | 0.013318  | -0.042319 |
| 3                | 6                | 0              | -2.169720               | -0.195674 | 0.978632  |
| 4                | 17               | 0              | -0.409640               | 2.402561  | 0.446414  |
| 5                | 15               | 0              | 2.142589                | 0.139974  | 0.033332  |
| 6                | 6                | 0              | 2.772893                | -0.787054 | 1.496325  |
| 7                | 6                | 0              | 2.933995                | 1.794870  | 0.153038  |
| 8                | 6                | 0              | 2.960086                | -0.659048 | -1.408173 |
| 9                | 6                | 0              | -2.614096               | -0.210446 | -0.378047 |
| 10               | 6                | 0              | -0.980022               | 0.199620  | -1.731405 |
| 11               | 6                | 0              | -3.506749               | 0.912483  | -0.879576 |
| 12               | 6                | 0              | -2.204749               | -1.418188 | 1.868698  |
| 13               | 1                | 0              | -2.304122               | 0.755873  | 1.494576  |
| 14               | 1                | 0              | 3.868418                | -0.786006 | 1.517411  |
| 15               | 1                | 0              | 2.402898                | -1.814376 | 1.440690  |
| 16               | 1                | 0              | 2.400747                | -0.324591 | 2.416226  |
| 17               | 1                | 0              | 2.558942                | 2.314420  | 1.037638  |
| 18               | 1                | 0              | 2.654930                | 2.392866  | -0.718462 |
| 19               | 1                | 0              | 4.024598                | 1.699432  | 0.203300  |
| 20               | 1                | 0              | 2.549177                | -1.664748 | -1.523783 |
| 21               | 1                | 0              | 4.045199                | -0.703667 | -1.261878 |
| 22               | 1                | 0              | 2.744218                | -0.083259 | -2.313243 |
| 23               | 1                | 0              | -2.781055               | -1.200038 | -0.801665 |
| 24               | 1                | 0              | -1.242840               | 1.183192  | -2.130192 |
| 25               | 1                | 0              | -1.060250               | -0.652748 | -2.413554 |
| 26               | 1                | 0              | -3.632958               | 0.895173  | -1.965814 |
| 27               | 1                | 0              | -3.113052               | 1.887220  | -0.578003 |
| 28               | 1                | 0              | -4.500309               | 0.788693  | -0.428487 |
| 29               | 1                | 0              | -1.435161               | -1.367870 | 2.647692  |
| 30               | 1                | 0              | -2.063229               | -2.342444 | 1.307277  |
| 31               | 1                | 0              | -3.176736               | -1.450249 | 2.384235  |

#### IVa

Zero-point correction= 0.200707  
 (Hartree/Particle)  
 Thermal correction to Energy= 0.216726  
 Thermal correction to Enthalpy= 0.217670  
 Thermal correction to Gibbs Free Energy= 0.156847  
 Sum of electronic and zero-point Energies= -1593.156941  
 Sum of electronic and thermal Energies= -1593.140922  
 Sum of electronic and thermal Enthalpies= -1593.139978  
 Sum of electronic and thermal Free Energies= -1593.200801

| Center<br>Number | Atomic<br>Number | Atomic<br>Type | Coordinates (Angstroms) |           |           |
|------------------|------------------|----------------|-------------------------|-----------|-----------|
|                  |                  |                | X                       | Y         | Z         |
| 1                | 17               | 0              | -0.340934               | -2.431387 | 0.000288  |
| 2                | 44               | 0              | -0.551040               | 0.006573  | 0.000189  |
| 3                | 6                | 0              | -1.983940               | -0.089461 | 1.352575  |
| 4                | 17               | 0              | -0.690853               | 2.430666  | 0.000198  |
| 5                | 15               | 0              | 1.832013                | 0.086135  | -0.000262 |
| 6                | 6                | 0              | 2.502094                | -0.792493 | 1.468189  |
| 7                | 6                | 0              | 2.649976                | 1.729764  | -0.001821 |
| 8                | 6                | 0              | 2.502878                | -0.795950 | -1.466156 |
| 9                | 6                | 0              | -2.807793               | -0.157536 | -0.000990 |
| 10               | 6                | 0              | -1.982799               | -0.089371 | -1.353489 |
| 11               | 1                | 0              | -2.021475               | -1.015112 | 1.925712  |
| 12               | 1                | 0              | -2.155835               | 0.826929  | 1.915571  |
| 13               | 1                | 0              | 3.596945                | -0.819901 | 1.433783  |
| 14               | 1                | 0              | 2.095756                | -1.806757 | 1.478382  |
| 15               | 1                | 0              | 2.187051                | -0.275680 | 2.379920  |
| 16               | 1                | 0              | 2.332276                | 2.293844  | 0.878333  |
| 17               | 1                | 0              | 2.331234                | 2.292803  | -0.882253 |
| 18               | 1                | 0              | 3.739885                | 1.615396  | -0.002374 |
| 19               | 1                | 0              | 2.095054                | -1.809641 | -1.475004 |
| 20               | 1                | 0              | 3.597620                | -0.825082 | -1.429739 |
| 21               | 1                | 0              | 2.190173                | -0.280419 | -2.379395 |
| 22               | 1                | 0              | -3.468004               | 0.710821  | -0.001122 |
| 23               | 1                | 0              | -3.323594               | -1.118369 | -0.001119 |
| 24               | 1                | 0              | -2.154122               | 0.827280  | -1.916187 |
| 25               | 1                | 0              | -2.019532               | -1.014802 | -1.926994 |

## IVb

Zero-point correction= 0.228962  
 (Hartree/Particle)  
 Thermal correction to Energy= 0.246457  
 Thermal correction to Enthalpy= 0.247401  
 Thermal correction to Gibbs Free Energy= 0.183169  
 Sum of electronic and zero-point Energies= -1632.441222  
 Sum of electronic and thermal Energies= -1632.423728  
 Sum of electronic and thermal Enthalpies= -1632.422783  
 Sum of electronic and thermal Free Energies= -1632.487015

| Center<br>Number | Atomic<br>Number | Atomic<br>Type | Coordinates (Angstroms) |           |           |
|------------------|------------------|----------------|-------------------------|-----------|-----------|
|                  |                  |                | X                       | Y         | Z         |
| 1                | 17               | 0              | -0.118746               | -2.478772 | -0.000908 |
| 2                | 44               | 0              | 0.331488                | -0.073187 | -0.001128 |
| 3                | 6                | 0              | 1.754088                | -0.335671 | -1.342950 |
| 4                | 17               | 0              | 0.686357                | 2.331244  | -0.001463 |
| 5                | 15               | 0              | -2.030657               | 0.244208  | 0.000285  |
| 6                | 6                | 0              | -2.789836               | -0.566817 | -1.463622 |
| 7                | 6                | 0              | -2.688649               | 1.958406  | -0.001504 |
| 8                | 6                | 0              | -2.783690               | -0.561775 | 1.470151  |
| 9                | 6                | 0              | 2.584492                | -0.521459 | 0.001382  |
| 10               | 6                | 0              | 1.751344                | -0.335204 | 1.343662  |
| 11               | 6                | 0              | 3.786465                | 0.436600  | 0.002384  |
| 12               | 1                | 0              | 1.679820                | -1.251376 | -1.928804 |
| 13               | 1                | 0              | 2.035306                | 0.558380  | -1.900494 |
| 14               | 1                | 0              | -3.881208               | -0.473754 | -1.430033 |



|    |   |   |           |           |           |
|----|---|---|-----------|-----------|-----------|
| 15 | 1 | 0 | -2.496276 | -1.619254 | -1.467024 |
| 16 | 1 | 0 | -2.420284 | -0.092883 | -2.378205 |
| 17 | 1 | 0 | -2.321135 | 2.487894  | -0.883711 |
| 18 | 1 | 0 | -2.317463 | 2.491198  | 0.877146  |
| 19 | 1 | 0 | -3.784496 | 1.945277  | 0.000707  |
| 20 | 1 | 0 | -2.490687 | -1.614364 | 1.475457  |
| 21 | 1 | 0 | -3.875148 | -0.468205 | 1.441189  |
| 22 | 1 | 0 | -2.409707 | -0.085201 | 2.381549  |
| 23 | 1 | 0 | 2.859985  | -1.578987 | 0.001742  |
| 24 | 1 | 0 | 2.031302  | 0.559082  | 1.901469  |
| 25 | 1 | 0 | 1.675747  | -1.250692 | 1.929707  |
| 26 | 1 | 0 | 4.404582  | 0.269213  | 0.890632  |
| 27 | 1 | 0 | 3.443121  | 1.475113  | 0.002048  |
| 28 | 1 | 0 | 4.406237  | 0.269169  | -0.884702 |

### IVc

|                                              |              |
|----------------------------------------------|--------------|
| Zero-point correction=                       | 0.286027     |
| (Hartree/Particle)                           |              |
| Thermal correction to Energy=                | 0.306219     |
| Thermal correction to Enthalpy=              | 0.307164     |
| Thermal correction to Gibbs Free Energy=     | 0.236912     |
| Sum of electronic and zero-point Energies=   | -1711.004301 |
| Sum of electronic and thermal Energies=      | -1710.984108 |
| Sum of electronic and thermal Enthalpies=    | -1710.983164 |
| Sum of electronic and thermal Free Energies= | -1711.053416 |

| Center Number | Atomic Number | Atomic Type | Coordinates (Angstroms) |           |           |
|---------------|---------------|-------------|-------------------------|-----------|-----------|
|               |               |             | X                       | Y         | Z         |
| 1             | 17            | 0           | -0.469237               | 2.592029  | -0.087517 |
| 2             | 44            | 0           | -0.115868               | 0.201332  | -0.046705 |
| 3             | 6             | 0           | 1.429931                | 0.358447  | 1.187455  |
| 4             | 17            | 0           | 0.074225                | -2.257393 | 0.014229  |
| 5             | 15            | 0           | -2.459559               | -0.243362 | 0.085800  |
| 6             | 6             | 0           | -2.875609               | -1.202715 | 1.596184  |
| 7             | 6             | 0           | -3.018112               | -1.260079 | -1.338707 |
| 8             | 6             | 0           | -3.592548               | 1.202996  | 0.112868  |
| 9             | 6             | 0           | 2.136340                | 0.642365  | -0.197767 |
| 10            | 6             | 0           | 1.246166                | 0.291144  | -1.471365 |
| 11            | 6             | 0           | 3.537598                | -0.055063 | -0.307464 |
| 12            | 6             | 0           | 3.547448                | -1.584322 | -0.202467 |
| 13            | 6             | 0           | 4.498538                | 0.573760  | 0.715344  |
| 14            | 1             | 0           | 1.403715                | 1.236626  | 1.832367  |
| 15            | 1             | 0           | 1.731112                | -0.567163 | 1.675594  |
| 16            | 1             | 0           | -3.943034               | -1.450260 | 1.610150  |
| 17            | 1             | 0           | -2.635899               | -0.609127 | 2.483879  |
| 18            | 1             | 0           | -2.270726               | -2.112132 | 1.602972  |
| 19            | 1             | 0           | -2.423318               | -2.175897 | -1.363117 |
| 20            | 1             | 0           | -2.857236               | -0.706204 | -2.268805 |
| 21            | 1             | 0           | -4.083944               | -1.496352 | -1.243975 |
| 22            | 1             | 0           | -3.350280               | 1.839414  | 0.967367  |
| 23            | 1             | 0           | -4.635087               | 0.870792  | 0.176253  |
| 24            | 1             | 0           | -3.444555               | 1.799229  | -0.790708 |
| 25            | 1             | 0           | 2.261436                | 1.726635  | -0.238535 |
| 26            | 1             | 0           | 1.500690                | -0.655503 | -1.946429 |
| 27            | 1             | 0           | 1.152616                | 1.141055  | -2.147909 |
| 28            | 1             | 0           | 3.901520                | 0.213859  | -1.308937 |
| 29            | 1             | 0           | 2.876130                | -2.061038 | -0.920347 |

|    |   |   |          |           |           |
|----|---|---|----------|-----------|-----------|
| 30 | 1 | 0 | 3.250071 | -1.928719 | 0.792955  |
| 31 | 1 | 0 | 4.564844 | -1.948074 | -0.390264 |
| 32 | 1 | 0 | 4.210431 | 0.318319  | 1.741912  |
| 33 | 1 | 0 | 4.522911 | 1.666493  | 0.631878  |
| 34 | 1 | 0 | 5.516848 | 0.201873  | 0.553149  |

## IVd

|                                              |              |
|----------------------------------------------|--------------|
| Zero-point correction=                       | 0.257303     |
| (Hartree/Particle)                           |              |
| Thermal correction to Energy=                | 0.276274     |
| Thermal correction to Enthalpy=              | 0.277218     |
| Thermal correction to Gibbs Free Energy=     | 0.210472     |
| Sum of electronic and zero-point Energies=   | -1671.728323 |
| Sum of electronic and thermal Energies=      | -1671.709352 |
| Sum of electronic and thermal Enthalpies=    | -1671.708408 |
| Sum of electronic and thermal Free Energies= | -1671.775153 |

| Center<br>Number | Atomic<br>Number | Atomic<br>Type | Coordinates (Angstroms) |           |           |
|------------------|------------------|----------------|-------------------------|-----------|-----------|
|                  |                  |                | X                       | Y         | Z         |
| 1                | 17               | 0              | 0.095115                | -2.386324 | -0.537480 |
| 2                | 44               | 0              | -0.233354               | 0.008229  | -0.109846 |
| 3                | 6                | 0              | -1.814310               | -0.179700 | 1.073420  |
| 4                | 17               | 0              | -0.390438               | 2.428847  | 0.179480  |
| 5                | 15               | 0              | 2.137668                | 0.155190  | 0.097991  |
| 6                | 6                | 0              | 2.789687                | -1.023834 | 1.349346  |
| 7                | 6                | 0              | 2.899012                | 1.770008  | 0.528541  |
| 8                | 6                | 0              | 2.911811                | -0.335849 | -1.495966 |
| 9                | 6                | 0              | -2.495090               | -0.204376 | -0.389790 |
| 10               | 6                | 0              | -1.532916               | 0.092580  | -1.601808 |
| 11               | 6                | 0              | -3.641444               | 0.824027  | -0.386265 |
| 12               | 6                | 0              | -2.056041               | -1.389918 | 1.945952  |
| 13               | 1                | 0              | -2.043781               | 0.765035  | 1.572307  |
| 14               | 1                | 0              | 3.885295                | -1.002796 | 1.361987  |
| 15               | 1                | 0              | 2.429516                | -2.025162 | 1.102058  |
| 16               | 1                | 0              | 2.417919                | -0.749519 | 2.341614  |
| 17               | 1                | 0              | 2.524820                | 2.101431  | 1.500324  |
| 18               | 1                | 0              | 2.602336                | 2.519284  | -0.208532 |
| 19               | 1                | 0              | 3.990696                | 1.678824  | 0.561240  |
| 20               | 1                | 0              | 2.549401                | -1.331107 | -1.765053 |
| 21               | 1                | 0              | 4.003843                | -0.341011 | -1.405461 |
| 22               | 1                | 0              | 2.621645                | 0.372612  | -2.277846 |
| 23               | 1                | 0              | -2.834772               | -1.234899 | -0.518052 |
| 24               | 1                | 0              | -1.676149               | 1.078505  | -2.044580 |
| 25               | 1                | 0              | -1.460700               | -0.732122 | -2.310445 |
| 26               | 1                | 0              | -4.188831               | 0.779902  | -1.333809 |
| 27               | 1                | 0              | -3.241937               | 1.833622  | -0.255560 |
| 28               | 1                | 0              | -4.343948               | 0.613457  | 0.427242  |
| 29               | 1                | 0              | -1.454566               | -1.318147 | 2.859784  |
| 30               | 1                | 0              | -1.810997               | -2.324792 | 1.439936  |
| 31               | 1                | 0              | -3.110999               | -1.413546 | 2.261608  |

## Vb

Zero-point correction= 0.225656  
(Hartree/Particle)  
Thermal correction to Energy= 0.244581  
Thermal correction to Enthalpy= 0.245525  
Thermal correction to Gibbs Free Energy= 0.178386  
Sum of electronic and zero-point Energies= -1632.447347  
Sum of electronic and thermal Energies= -1632.428422  
Sum of electronic and thermal Enthalpies= -1632.427478  
Sum of electronic and thermal Free Energies= -1632.494616

| Center<br>Number | Atomic<br>Number | Atomic<br>Type | Coordinates (Angstroms) |           |           |
|------------------|------------------|----------------|-------------------------|-----------|-----------|
|                  |                  |                | X                       | Y         | Z         |
| 1                | 17               | 0              | 0.361932                | 2.325220  | 0.329466  |
| 2                | 44               | 0              | 0.355736                | 0.007917  | -0.312476 |
| 3                | 6                | 0              | 2.935312                | 0.434440  | 0.042110  |
| 4                | 17               | 0              | 0.474429                | -2.263932 | 0.444494  |
| 5                | 15               | 0              | -1.913635               | -0.025773 | 0.172554  |
| 6                | 6                | 0              | -2.194076               | 0.002247  | 1.990565  |
| 7                | 6                | 0              | -2.838104               | -1.507076 | -0.412187 |
| 8                | 6                | 0              | -2.907423               | 1.387933  | -0.464259 |
| 9                | 6                | 0              | 2.806898                | -0.429038 | -0.992643 |
| 10               | 6                | 0              | 0.009980                | -0.004128 | -2.104700 |
| 11               | 6                | 0              | 3.150296                | 0.043600  | 1.477509  |
| 12               | 1                | 0              | 2.976028                | 1.499872  | -0.171499 |
| 13               | 1                | 0              | -3.264067               | -0.017866 | 2.225117  |
| 14               | 1                | 0              | -1.746221               | 0.910896  | 2.403125  |
| 15               | 1                | 0              | -1.705140               | -0.868238 | 2.437306  |
| 16               | 1                | 0              | -2.356573               | -2.403743 | -0.015530 |
| 17               | 1                | 0              | -2.805329               | -1.555267 | -1.505064 |
| 18               | 1                | 0              | -3.883902               | -1.465571 | -0.088307 |
| 19               | 1                | 0              | -2.467664               | 2.320057  | -0.102458 |
| 20               | 1                | 0              | -3.949298               | 1.309233  | -0.134770 |
| 21               | 1                | 0              | -2.880778               | 1.398530  | -1.558313 |
| 22               | 1                | 0              | 2.831071                | -1.504761 | -0.848774 |
| 23               | 1                | 0              | 2.808085                | -0.065509 | -2.015801 |
| 24               | 1                | 0              | 0.830679                | -0.016179 | -2.829566 |
| 25               | 1                | 0              | -0.987523               | 0.009430  | -2.561149 |
| 26               | 1                | 0              | 4.182523                | 0.284463  | 1.768515  |
| 27               | 1                | 0              | 2.494313                | 0.617115  | 2.142977  |
| 28               | 1                | 0              | 2.980525                | -1.023996 | 1.639146  |

## Vc

Zero-point correction= 0.282422  
(Hartree/Particle)  
Thermal correction to Energy= 0.304118  
Thermal correction to Enthalpy= 0.305062  
Thermal correction to Gibbs Free Energy= 0.231393  
Sum of electronic and zero-point Energies= -1711.015944  
Sum of electronic and thermal Energies= -1710.994249  
Sum of electronic and thermal Enthalpies= -1710.993305  
Sum of electronic and thermal Free Energies= -1711.066973

| Center | Atomic | Atomic | Coordinates (Angstroms) |  |  |
|--------|--------|--------|-------------------------|--|--|
|--------|--------|--------|-------------------------|--|--|

| Number | Number | Type | X         | Y         | Z         |
|--------|--------|------|-----------|-----------|-----------|
| 1      | 17     | 0    | -0.094339 | 2.348744  | 0.328107  |
| 2      | 44     | 0    | -0.151349 | 0.093555  | -0.486867 |
| 3      | 6      | 0    | 2.565418  | 0.528169  | -0.492297 |
| 4      | 17     | 0    | 0.261203  | -2.232236 | -0.098184 |
| 5      | 15     | 0    | -2.258033 | -0.142539 | 0.428202  |
| 6      | 6      | 0    | -2.157949 | -0.279783 | 2.260596  |
| 7      | 6      | 0    | -3.206558 | -1.633298 | -0.090065 |
| 8      | 6      | 0    | -3.430930 | 1.247398  | 0.139395  |
| 9      | 6      | 0    | 2.127821  | 0.138757  | -1.711347 |
| 10     | 6      | 0    | -0.856339 | 0.195003  | -2.167477 |
| 11     | 6      | 0    | 3.239837  | -0.356532 | 0.527088  |
| 12     | 6      | 0    | 4.762990  | -0.106366 | 0.457224  |
| 13     | 6      | 0    | 2.715479  | -0.101059 | 1.950088  |
| 14     | 1      | 0    | 2.526158  | 1.588864  | -0.246070 |
| 15     | 1      | 0    | -3.154573 | -0.387610 | 2.703117  |
| 16     | 1      | 0    | -1.677862 | 0.619588  | 2.656978  |
| 17     | 1      | 0    | -1.548754 | -1.150650 | 2.519819  |
| 18     | 1      | 0    | -2.609231 | -2.523379 | 0.120667  |
| 19     | 1      | 0    | -3.394735 | -1.595564 | -1.167538 |
| 20     | 1      | 0    | -4.165025 | -1.688422 | 0.437721  |
| 21     | 1      | 0    | -2.971382 | 2.175102  | 0.488303  |
| 22     | 1      | 0    | -4.376550 | 1.074127  | 0.664728  |
| 23     | 1      | 0    | -3.631754 | 1.346446  | -0.931912 |
| 24     | 1      | 0    | 2.189704  | -0.896579 | -2.035784 |
| 25     | 1      | 0    | 1.828440  | 0.878690  | -2.447400 |
| 26     | 1      | 0    | -0.201705 | 0.308017  | -3.038629 |
| 27     | 1      | 0    | -1.923855 | 0.154050  | -2.416163 |
| 28     | 1      | 0    | 3.045242  | -1.402022 | 0.262572  |
| 29     | 1      | 0    | 5.004969  | 0.937481  | 0.693393  |
| 30     | 1      | 0    | 5.158468  | -0.328023 | -0.539788 |
| 31     | 1      | 0    | 5.283564  | -0.742777 | 1.182372  |
| 32     | 1      | 0    | 1.654417  | -0.357876 | 2.035936  |
| 33     | 1      | 0    | 2.834553  | 0.951535  | 2.234272  |
| 34     | 1      | 0    | 3.264457  | -0.713718 | 2.674600  |

## Ve

|                                              |              |
|----------------------------------------------|--------------|
| Zero-point correction=                       | 0.310743     |
| (Hartree/Particle)                           |              |
| Thermal correction to Energy=                | 0.334002     |
| Thermal correction to Enthalpy=              | 0.334946     |
| Thermal correction to Gibbs Free Energy=     | 0.257807     |
| Sum of electronic and zero-point Energies=   | -1750.302772 |
| Sum of electronic and thermal Energies=      | -1750.279513 |
| Sum of electronic and thermal Enthalpies=    | -1750.278569 |
| Sum of electronic and thermal Free Energies= | -1750.355708 |

| Center<br>Number | Atomic<br>Number | Atomic<br>Type | Coordinates (Angstroms) |           |           |
|------------------|------------------|----------------|-------------------------|-----------|-----------|
|                  |                  |                | X                       | Y         | Z         |
| 1                | 17               | 0              | -0.412307               | 2.328472  | -0.735558 |
| 2                | 44               | 0              | -0.259654               | -0.037879 | -0.393226 |
| 3                | 17               | 0              | 0.234942                | -1.861485 | 1.077101  |
| 4                | 15               | 0              | -2.426563               | -0.040692 | 0.382929  |
| 5                | 6                | 0              | -2.504099               | 0.647297  | 2.087486  |
| 6                | 6                | 0              | -3.232555               | -1.690686 | 0.519374  |

|    |   |   |           |           |           |
|----|---|---|-----------|-----------|-----------|
| 7  | 6 | 0 | -3.639012 | 0.961415  | -0.573948 |
| 8  | 6 | 0 | -0.781719 | -0.790062 | -1.970325 |
| 9  | 1 | 0 | -3.530184 | 0.634044  | 2.471803  |
| 10 | 1 | 0 | -2.132331 | 1.675972  | 2.073317  |
| 11 | 1 | 0 | -1.862328 | 0.047561  | 2.739328  |
| 12 | 1 | 0 | -2.609541 | -2.337725 | 1.141019  |
| 13 | 1 | 0 | -3.315423 | -2.145056 | -0.472802 |
| 14 | 1 | 0 | -4.233718 | -1.599106 | 0.954818  |
| 15 | 1 | 0 | -3.268570 | 1.986141  | -0.651424 |
| 16 | 1 | 0 | -4.621571 | 0.950706  | -0.089442 |
| 17 | 1 | 0 | -3.736875 | 0.555519  | -1.585641 |
| 18 | 1 | 0 | -0.039413 | -1.004748 | -2.747588 |
| 19 | 1 | 0 | -1.807163 | -1.064042 | -2.247553 |
| 20 | 6 | 0 | 2.424014  | 0.560120  | -0.393396 |
| 21 | 6 | 0 | 2.212562  | -0.232808 | -1.473574 |
| 22 | 6 | 0 | 3.131938  | 0.193750  | 0.891426  |
| 23 | 6 | 0 | 4.637617  | 0.505553  | 0.736599  |
| 24 | 6 | 0 | 2.545326  | 0.951081  | 2.093734  |
| 25 | 6 | 0 | 2.622828  | -1.672007 | -1.631690 |
| 26 | 1 | 0 | 2.177460  | 1.615276  | -0.502325 |
| 27 | 1 | 0 | 1.839953  | 0.259611  | -2.371543 |
| 28 | 1 | 0 | 3.018979  | -0.879824 | 1.075151  |
| 29 | 1 | 0 | 4.800967  | 1.571356  | 0.533690  |
| 30 | 1 | 0 | 5.083371  | -0.065313 | -0.085222 |
| 31 | 1 | 0 | 5.175060  | 0.254048  | 1.658778  |
| 32 | 1 | 0 | 1.498526  | 0.677136  | 2.260906  |
| 33 | 1 | 0 | 2.596455  | 2.036477  | 1.940742  |
| 34 | 1 | 0 | 3.101656  | 0.712327  | 3.007642  |
| 35 | 1 | 0 | 2.782299  | -2.167148 | -0.671854 |
| 36 | 1 | 0 | 3.553537  | -1.733096 | -2.213693 |
| 37 | 1 | 0 | 1.865890  | -2.243748 | -2.180460 |

### TS (V-VI) b

|                                              |              |
|----------------------------------------------|--------------|
| Zero-point correction=                       | 0.226624     |
| (Hartree/Particle)                           |              |
| Thermal correction to Energy=                | 0.244276     |
| Thermal correction to Enthalpy=              | 0.245220     |
| Thermal correction to Gibbs Free Energy=     | 0.180691     |
| Sum of electronic and zero-point Energies=   | -1632.433618 |
| Sum of electronic and thermal Energies=      | -1632.415966 |
| Sum of electronic and thermal Enthalpies=    | -1632.415022 |
| Sum of electronic and thermal Free Energies= | -1632.479552 |

| Center<br>Number | Atomic<br>Number | Atomic<br>Type | Coordinates (Angstroms) |           |           |
|------------------|------------------|----------------|-------------------------|-----------|-----------|
|                  |                  |                | X                       | Y         | Z         |
| 1                | 17               | 0              | 0.015872                | -2.481794 | 0.106226  |
| 2                | 44               | 0              | -0.415584               | -0.070246 | -0.141485 |
| 3                | 6                | 0              | -2.428811               | -0.531661 | 0.661250  |
| 4                | 17               | 0              | -0.743513               | 2.349043  | -0.244817 |
| 5                | 15               | 0              | 1.941181                | 0.211138  | 0.154079  |
| 6                | 6                | 0              | 2.405302                | -0.281646 | 1.868553  |
| 7                | 6                | 0              | 2.653544                | 1.893859  | -0.050792 |
| 8                | 6                | 0              | 2.971873                | -0.859565 | -0.929001 |
| 9                | 6                | 0              | -2.686721               | -0.353583 | -0.717238 |
| 10               | 6                | 0              | -0.867924               | -0.259612 | -1.923910 |
| 11               | 6                | 0              | -2.828357               | 0.476702  | 1.712916  |

|    |   |   |           |           |           |
|----|---|---|-----------|-----------|-----------|
| 12 | 1 | 0 | -2.335789 | -1.561856 | 0.999879  |
| 13 | 1 | 0 | 3.488579  | -0.204385 | 2.014606  |
| 14 | 1 | 0 | 2.079291  | -1.312082 | 2.033886  |
| 15 | 1 | 0 | 1.903627  | 0.370440  | 2.590786  |
| 16 | 1 | 0 | 2.133557  | 2.591166  | 0.609817  |
| 17 | 1 | 0 | 2.492335  | 2.234315  | -1.077163 |
| 18 | 1 | 0 | 3.726576  | 1.887471  | 0.171819  |
| 19 | 1 | 0 | 2.607221  | -1.885964 | -0.845413 |
| 20 | 1 | 0 | 4.027303  | -0.804253 | -0.639818 |
| 21 | 1 | 0 | 2.867494  | -0.531676 | -1.967778 |
| 22 | 1 | 0 | -3.088960 | 0.595412  | -1.060236 |
| 23 | 1 | 0 | -2.910625 | -1.236147 | -1.310499 |
| 24 | 1 | 0 | -1.102061 | 0.610095  | -2.546130 |
| 25 | 1 | 0 | -0.844305 | -1.234818 | -2.420717 |
| 26 | 1 | 0 | -3.813458 | 0.195741  | 2.113987  |
| 27 | 1 | 0 | -2.130699 | 0.469143  | 2.558703  |
| 28 | 1 | 0 | -2.875665 | 1.490953  | 1.313818  |

### TS (V-VI) c

|                                              |              |
|----------------------------------------------|--------------|
| Zero-point correction=                       | 0.283463     |
| (Hartree/Particle)                           |              |
| Thermal correction to Energy=                | 0.303797     |
| Thermal correction to Enthalpy=              | 0.304741     |
| Thermal correction to Gibbs Free Energy=     | 0.234546     |
| Sum of electronic and zero-point Energies=   | -1711.003277 |
| Sum of electronic and thermal Energies=      | -1710.982943 |
| Sum of electronic and thermal Enthalpies=    | -1710.981999 |
| Sum of electronic and thermal Free Energies= | -1711.052194 |

| Center<br>Number | Atomic<br>Number | Atomic<br>Type | Coordinates (Angstroms) |           |           |
|------------------|------------------|----------------|-------------------------|-----------|-----------|
|                  |                  |                | X                       | Y         | Z         |
| 1                | 17               | 0              | -0.430053               | 2.475734  | 0.349318  |
| 2                | 44               | 0              | 0.007898                | 0.164664  | -0.373974 |
| 3                | 6                | 0              | 2.154054                | 0.637711  | -0.025857 |
| 4                | 17               | 0              | 0.391991                | -2.178372 | -0.958799 |
| 5                | 15               | 0              | -2.194264               | -0.329218 | 0.415720  |
| 6                | 6                | 0              | -2.283979               | -0.063014 | 2.237637  |
| 7                | 6                | 0              | -2.849087               | -2.029503 | 0.166385  |
| 8                | 6                | 0              | -3.495187               | 0.774296  | -0.271707 |
| 9                | 6                | 0              | 2.049401                | 0.731456  | -1.430311 |
| 10               | 6                | 0              | -0.026348               | 0.647357  | -2.156505 |
| 11               | 6                | 0              | 2.889541                | -0.487630 | 0.683621  |
| 12               | 6                | 0              | 4.370836                | -0.082801 | 0.840915  |
| 13               | 6                | 0              | 2.263238                | -0.794607 | 2.053569  |
| 14               | 1                | 0              | 2.103570                | 1.579093  | 0.521921  |
| 15               | 1                | 0              | -3.297184               | -0.254003 | 2.608964  |
| 16               | 1                | 0              | -1.996461               | 0.969897  | 2.451314  |
| 17               | 1                | 0              | -1.587561               | -0.736441 | 2.747350  |
| 18               | 1                | 0              | -2.159938               | -2.751594 | 0.610345  |
| 19               | 1                | 0              | -2.902406               | -2.246452 | -0.903699 |
| 20               | 1                | 0              | -3.843735               | -2.130177 | 0.615124  |
| 21               | 1                | 0              | -3.178506               | 1.810239  | -0.128876 |
| 22               | 1                | 0              | -4.456395               | 0.598408  | 0.223935  |
| 23               | 1                | 0              | -3.604270               | 0.583122  | -1.343595 |
| 24               | 1                | 0              | 2.389176                | -0.101016 | -2.040401 |
| 25               | 1                | 0              | 2.058994                | 1.719568  | -1.882101 |

|    |   |   |           |           |           |
|----|---|---|-----------|-----------|-----------|
| 26 | 1 | 0 | 0.080112  | -0.099737 | -2.949705 |
| 27 | 1 | 0 | -0.216167 | 1.679662  | -2.467761 |
| 28 | 1 | 0 | 2.828964  | -1.388515 | 0.065341  |
| 29 | 1 | 0 | 4.472665  | 0.826488  | 1.446619  |
| 30 | 1 | 0 | 4.840592  | 0.104279  | -0.131185 |
| 31 | 1 | 0 | 4.929565  | -0.882974 | 1.340576  |
| 32 | 1 | 0 | 1.247454  | -1.192675 | 1.941613  |
| 33 | 1 | 0 | 2.219206  | 0.103144  | 2.683270  |
| 34 | 1 | 0 | 2.851012  | -1.552003 | 2.584722  |

## TS (V-VI) e

|                                              |              |
|----------------------------------------------|--------------|
| Zero-point correction=                       | 0.311999     |
| (Hartree/Particle)                           |              |
| Thermal correction to Energy=                | 0.333791     |
| Thermal correction to Enthalpy=              | 0.334735     |
| Thermal correction to Gibbs Free Energy=     | 0.261258     |
| Sum of electronic and zero-point Energies=   | -1750.287320 |
| Sum of electronic and thermal Energies=      | -1750.265528 |
| Sum of electronic and thermal Enthalpies=    | -1750.264584 |
| Sum of electronic and thermal Free Energies= | -1750.338061 |

| Center<br>Number | Atomic<br>Number | Atomic<br>Type | Coordinates (Angstroms) |           |           |
|------------------|------------------|----------------|-------------------------|-----------|-----------|
|                  |                  |                | X                       | Y         | Z         |
| 1                | 17               | 0              | -0.585310               | 2.506200  | 0.221830  |
| 2                | 44               | 0              | -0.098882               | 0.146079  | -0.289704 |
| 3                | 17               | 0              | 0.287425                | -2.246505 | -0.613532 |
| 4                | 15               | 0              | -2.383262               | -0.290798 | 0.289858  |
| 5                | 6                | 0              | -2.593148               | -0.133843 | 2.113834  |
| 6                | 6                | 0              | -3.088870               | -1.939244 | -0.120880 |
| 7                | 6                | 0              | -3.589585               | 0.900353  | -0.423365 |
| 8                | 6                | 0              | 0.181818                | 0.541771  | -2.081872 |
| 9                | 1                | 0              | -3.640399               | -0.284772 | 2.398549  |
| 10               | 1                | 0              | -2.267466               | 0.864281  | 2.419387  |
| 11               | 1                | 0              | -1.975880               | -0.881200 | 2.622231  |
| 12               | 1                | 0              | -2.465164               | -2.722921 | 0.313886  |
| 13               | 1                | 0              | -3.079273               | -2.075301 | -1.206052 |
| 14               | 1                | 0              | -4.117768               | -2.019072 | 0.248127  |
| 15               | 1                | 0              | -3.242052               | 1.914186  | -0.213394 |
| 16               | 1                | 0              | -4.587775               | 0.739009  | -0.001092 |
| 17               | 1                | 0              | -3.633354               | 0.763975  | -1.508347 |
| 18               | 1                | 0              | 0.362009                | -0.253978 | -2.809789 |
| 19               | 1                | 0              | 0.009756                | 1.545465  | -2.481691 |
| 20               | 6                | 0              | 1.951042                | 0.629693  | 0.267174  |
| 21               | 6                | 0              | 2.043990                | 0.712575  | -1.169134 |
| 22               | 6                | 0              | 2.684662                | -0.401173 | 1.112031  |
| 23               | 6                | 0              | 4.120494                | 0.104306  | 1.378478  |
| 24               | 6                | 0              | 1.954688                | -0.641046 | 2.443969  |
| 25               | 6                | 0              | 2.862301                | -0.280546 | -1.973695 |
| 26               | 1                | 0              | 1.826668                | 1.592598  | 0.763560  |
| 27               | 1                | 0              | 2.050748                | 1.740556  | -1.529279 |
| 28               | 1                | 0              | 2.734056                | -1.351154 | 0.572819  |
| 29               | 1                | 0              | 4.107866                | 1.055296  | 1.925482  |
| 30               | 1                | 0              | 4.681646                | 0.259478  | 0.450582  |
| 31               | 1                | 0              | 4.670686                | -0.624509 | 1.985333  |
| 32               | 1                | 0              | 0.974007                | -1.100932 | 2.278343  |
| 33               | 1                | 0              | 1.812746                | 0.299138  | 2.992444  |
| 34               | 1                | 0              | 2.532078                | -1.319281 | 3.082909  |

|    |   |   |          |           |           |
|----|---|---|----------|-----------|-----------|
| 35 | 1 | 0 | 2.548247 | -1.308148 | -1.775383 |
| 36 | 1 | 0 | 3.920953 | -0.182201 | -1.703006 |
| 37 | 1 | 0 | 2.777095 | -0.087893 | -3.046835 |

---

## VIb

|                                              |              |
|----------------------------------------------|--------------|
| Zero-point correction=                       | 0.229150     |
| (Hartree/Particle)                           |              |
| Thermal correction to Energy=                | 0.246687     |
| Thermal correction to Enthalpy=              | 0.247632     |
| Thermal correction to Gibbs Free Energy=     | 0.183845     |
| Sum of electronic and zero-point Energies=   | -1632.444097 |
| Sum of electronic and thermal Energies=      | -1632.426560 |
| Sum of electronic and thermal Enthalpies=    | -1632.425616 |
| Sum of electronic and thermal Free Energies= | -1632.489402 |

---

| Center<br>Number | Atomic<br>Number | Atomic<br>Type | Coordinates (Angstroms) |           |           |
|------------------|------------------|----------------|-------------------------|-----------|-----------|
|                  |                  |                | X                       | Y         | Z         |
| 1                | 17               | 0              | 0.074758                | -2.476957 | 0.019404  |
| 2                | 44               | 0              | -0.417519               | -0.069077 | -0.160344 |
| 3                | 6                | 0              | -2.011028               | -0.402249 | 0.975373  |
| 4                | 17               | 0              | -0.725175               | 2.321361  | -0.472405 |
| 5                | 15               | 0              | 1.935164                | 0.223460  | 0.151084  |
| 6                | 6                | 0              | 2.522771                | -0.557440 | 1.708118  |
| 7                | 6                | 0              | 2.594105                | 1.938043  | 0.203954  |
| 8                | 6                | 0              | 2.859969                | -0.603674 | -1.204663 |
| 9                | 6                | 0              | -2.609612               | -0.452430 | -0.515641 |
| 10               | 6                | 0              | -1.589430               | -0.453109 | -1.710352 |
| 11               | 6                | 0              | -2.592368               | 0.644753  | 1.896776  |
| 12               | 1                | 0              | -1.987732               | -1.404152 | 1.407851  |
| 13               | 1                | 0              | 3.614334                | -0.493979 | 1.780475  |
| 14               | 1                | 0              | 2.199626                | -1.600951 | 1.713680  |
| 15               | 1                | 0              | 2.079593                | -0.043943 | 2.567102  |
| 16               | 1                | 0              | 2.123082                | 2.484213  | 1.025132  |
| 17               | 1                | 0              | 2.334724                | 2.455320  | -0.722515 |
| 18               | 1                | 0              | 3.681592                | 1.926258  | 0.338984  |
| 19               | 1                | 0              | 2.556347                | -1.652739 | -1.238316 |
| 20               | 1                | 0              | 3.939972                | -0.522771 | -1.038082 |
| 21               | 1                | 0              | 2.608909                | -0.130388 | -2.158915 |
| 22               | 1                | 0              | -3.274242               | 0.404675  | -0.624042 |
| 23               | 1                | 0              | -3.117865               | -1.418420 | -0.557297 |
| 24               | 1                | 0              | -1.726054               | 0.383366  | -2.394909 |
| 25               | 1                | 0              | -1.448976               | -1.426754 | -2.177123 |
| 26               | 1                | 0              | -3.614478               | 0.356882  | 2.187597  |
| 27               | 1                | 0              | -2.003081               | 0.697687  | 2.819780  |
| 28               | 1                | 0              | -2.611724               | 1.634954  | 1.439113  |

---

## VIc

|                                            |              |
|--------------------------------------------|--------------|
| Zero-point correction=                     | 0.285875     |
| (Hartree/Particle)                         |              |
| Thermal correction to Energy=              | 0.306244     |
| Thermal correction to Enthalpy=            | 0.307189     |
| Thermal correction to Gibbs Free Energy=   | 0.236833     |
| Sum of electronic and zero-point Energies= | -1711.014094 |
| Sum of electronic and thermal Energies=    | -1710.993724 |



Sum of electronic and thermal Enthalpies= -1710.992780  
 Sum of electronic and thermal Free Energies= -1711.063136

| Center<br>Number | Atomic<br>Number | Atomic<br>Type | Coordinates (Angstroms) |           |           |
|------------------|------------------|----------------|-------------------------|-----------|-----------|
|                  |                  |                | X                       | Y         | Z         |
| 1                | 17               | 0              | -0.558757               | 2.413205  | 0.685078  |
| 2                | 44               | 0              | 0.004756                | 0.268178  | -0.383675 |
| 3                | 6                | 0              | 1.834382                | 0.453127  | 0.366362  |
| 4                | 17               | 0              | 0.368333                | -1.842010 | -1.532189 |
| 5                | 15               | 0              | -2.141295               | -0.458310 | 0.380091  |
| 6                | 6                | 0              | -2.365706               | -0.207763 | 2.187217  |
| 7                | 6                | 0              | -2.623389               | -2.206162 | 0.080767  |
| 8                | 6                | 0              | -3.451331               | 0.547968  | -0.426584 |
| 9                | 6                | 0              | 1.980422                | 1.080767  | -1.105199 |
| 10               | 6                | 0              | 0.673418                | 1.258781  | -1.961054 |
| 11               | 6                | 0              | 2.734728                | -0.724722 | 0.705891  |
| 12               | 6                | 0              | 4.179821                | -0.230206 | 0.925170  |
| 13               | 6                | 0              | 2.212923                | -1.443332 | 1.961639  |
| 14               | 1                | 0              | 1.870110                | 1.244321  | 1.120613  |
| 15               | 1                | 0              | -3.388647               | -0.464412 | 2.484539  |
| 16               | 1                | 0              | -2.149405               | 0.837668  | 2.418749  |
| 17               | 1                | 0              | -1.664818               | -0.843576 | 2.736917  |
| 18               | 1                | 0              | -1.919353               | -2.870197 | 0.588939  |
| 19               | 1                | 0              | -2.561502               | -2.421685 | -0.988262 |
| 20               | 1                | 0              | -3.639110               | -2.393321 | 0.447415  |
| 21               | 1                | 0              | -3.257957               | 1.601679  | -0.211429 |
| 22               | 1                | 0              | -4.440807               | 0.259521  | -0.054449 |
| 23               | 1                | 0              | -3.417786               | 0.394078  | -1.509474 |
| 24               | 1                | 0              | 2.663601                | 0.435394  | -1.658173 |
| 25               | 1                | 0              | 2.362989                | 2.088202  | -0.930021 |
| 26               | 1                | 0              | 0.680608                | 0.685091  | -2.887263 |
| 27               | 1                | 0              | 0.337228                | 2.290874  | -2.046824 |
| 28               | 1                | 0              | 2.720031                | -1.434751 | -0.126689 |
| 29               | 1                | 0              | 4.231260                | 0.488540  | 1.752890  |
| 30               | 1                | 0              | 4.583515                | 0.257086  | 0.030011  |
| 31               | 1                | 0              | 4.836214                | -1.073167 | 1.170946  |
| 32               | 1                | 0              | 1.227952                | -1.883700 | 1.773064  |
| 33               | 1                | 0              | 2.128184                | -0.752469 | 2.810631  |
| 34               | 1                | 0              | 2.893482                | -2.251415 | 2.253822  |

## VIe

Zero-point correction= 0.314358  
 (Hartree/Particle)  
 Thermal correction to Energy= 0.335991  
 Thermal correction to Enthalpy= 0.336935  
 Thermal correction to Gibbs Free Energy= 0.264715  
 Sum of electronic and zero-point Energies= -1750.293900  
 Sum of electronic and thermal Energies= -1750.272267  
 Sum of electronic and thermal Enthalpies= -1750.271323  
 Sum of electronic and thermal Free Energies= -1750.343543

| Center<br>Number | Atomic<br>Number | Atomic<br>Type | Coordinates (Angstroms) |          |           |
|------------------|------------------|----------------|-------------------------|----------|-----------|
|                  |                  |                | X                       | Y        | Z         |
| 1                | 17               | 0              | -0.667232               | 2.289647 | 1.009719  |
| 2                | 44               | 0              | -0.073929               | 0.274570 | -0.291927 |

|    |    |   |           |           |           |
|----|----|---|-----------|-----------|-----------|
| 3  | 17 | 0 | 0.292848  | -1.712999 | -1.635168 |
| 4  | 15 | 0 | -2.315987 | -0.405285 | 0.189431  |
| 5  | 6  | 0 | -2.659393 | -0.446794 | 1.994687  |
| 6  | 6  | 0 | -2.867393 | -2.047652 | -0.426916 |
| 7  | 6  | 0 | -3.518795 | 0.790212  | -0.519531 |
| 8  | 6  | 0 | 0.721362  | 1.471912  | -1.633869 |
| 9  | 1  | 0 | -3.707432 | -0.709009 | 2.178230  |
| 10 | 1  | 0 | -2.431966 | 0.536319  | 2.412735  |
| 11 | 1  | 0 | -2.016392 | -1.191669 | 2.473462  |
| 12 | 1  | 0 | -2.239402 | -2.830620 | 0.005617  |
| 13 | 1  | 0 | -2.741197 | -2.089868 | -1.511112 |
| 14 | 1  | 0 | -3.916014 | -2.223224 | -0.160911 |
| 15 | 1  | 0 | -3.289193 | 1.784323  | -0.129042 |
| 16 | 1  | 0 | -4.543047 | 0.503228  | -0.255885 |
| 17 | 1  | 0 | -3.420942 | 0.804663  | -1.609384 |
| 18 | 1  | 0 | 0.785708  | 1.054134  | -2.639796 |
| 19 | 1  | 0 | 0.424807  | 2.518604  | -1.583325 |
| 20 | 6  | 0 | 1.696162  | 0.343870  | 0.627994  |
| 21 | 6  | 0 | 2.003638  | 1.129108  | -0.747059 |
| 22 | 6  | 0 | 2.469270  | -0.916358 | 0.994715  |
| 23 | 6  | 0 | 3.799762  | -0.537774 | 1.680766  |
| 24 | 6  | 0 | 1.630523  | -1.795276 | 1.942926  |
| 25 | 6  | 0 | 3.075189  | 0.476360  | -1.628149 |
| 26 | 1  | 0 | 1.663642  | 1.056713  | 1.455728  |
| 27 | 1  | 0 | 2.296919  | 2.113657  | -0.370718 |
| 28 | 1  | 0 | 2.672078  | -1.500956 | 0.093186  |
| 29 | 1  | 0 | 3.612714  | 0.006569  | 2.615064  |
| 30 | 1  | 0 | 4.431627  | 0.095437  | 1.049070  |
| 31 | 1  | 0 | 4.370575  | -1.440873 | 1.927118  |
| 32 | 1  | 0 | 0.742479  | -2.178035 | 1.429852  |
| 33 | 1  | 0 | 1.312745  | -1.231820 | 2.829741  |
| 34 | 1  | 0 | 2.218634  | -2.655070 | 2.285168  |
| 35 | 1  | 0 | 2.711311  | -0.465194 | -2.047942 |
| 36 | 1  | 0 | 3.994564  | 0.282328  | -1.068955 |
| 37 | 1  | 0 | 3.323015  | 1.149907  | -2.455349 |

## IXa

Zero-point correction= 0.235559  
(Hartree/Particle)  
Thermal correction to Energy= 0.253631  
Thermal correction to Enthalpy= 0.254575  
Thermal correction to Gibbs Free Energy= 0.188998  
Sum of electronic and zero-point Energies= -1438.037696  
Sum of electronic and thermal Energies= -1438.019623  
Sum of electronic and thermal Enthalpies= -1438.018679  
Sum of electronic and thermal Free Energies= -1438.084257

| Center<br>Number | Atomic<br>Number | Atomic<br>Type | Coordinates (Angstroms) |           |           |
|------------------|------------------|----------------|-------------------------|-----------|-----------|
|                  |                  |                | X                       | Y         | Z         |
| 1                | 17               | 0              | 0.565054                | -1.823525 | 1.524965  |
| 2                | 44               | 0              | 0.793442                | -0.062725 | -0.090223 |
| 3                | 6                | 0              | 0.784516                | -0.812616 | -1.753186 |
| 4                | 17               | 0              | 1.166350                | 2.212380  | -0.823507 |
| 5                | 6                | 0              | -1.239003               | 0.088682  | -0.091822 |
| 6                | 6                | 0              | -3.376420               | 0.857339  | 0.502813  |
| 7                | 7                | 0              | -1.931373               | 1.112139  | 0.462035  |
| 8                | 7                | 0              | -2.134586               | -0.810418 | -0.563622 |

|    |   |   |           |           |           |
|----|---|---|-----------|-----------|-----------|
| 9  | 6 | 0 | -3.522366 | -0.348539 | -0.430710 |
| 10 | 6 | 0 | -1.897516 | -2.148486 | -1.075942 |
| 11 | 6 | 0 | -1.411015 | 2.135085  | 1.353762  |
| 12 | 1 | 0 | 1.666292  | -1.299411 | -2.183904 |
| 13 | 1 | 0 | -0.081043 | -0.761735 | -2.421428 |
| 14 | 1 | 0 | -3.933098 | 1.735996  | 0.162199  |
| 15 | 1 | 0 | -3.688013 | 0.630773  | 1.532846  |
| 16 | 1 | 0 | -3.928084 | -0.071777 | -1.413335 |
| 17 | 1 | 0 | -4.151659 | -1.141085 | -0.012700 |
| 18 | 1 | 0 | -2.049879 | -2.200693 | -2.162401 |
| 19 | 1 | 0 | -0.888901 | -2.467991 | -0.821443 |
| 20 | 1 | 0 | -2.604796 | -2.836268 | -0.597542 |
| 21 | 1 | 0 | -0.354626 | 2.302303  | 1.156472  |
| 22 | 1 | 0 | -1.561863 | 1.842313  | 2.402915  |
| 23 | 1 | 0 | -1.940707 | 3.076314  | 1.171810  |
| 24 | 6 | 0 | 3.297647  | -0.601299 | -0.240619 |
| 25 | 6 | 0 | 3.131390  | 0.177744  | 0.850715  |
| 26 | 1 | 0 | 3.568524  | -0.167548 | -1.198818 |
| 27 | 1 | 0 | 3.254751  | -1.684149 | -0.170641 |
| 28 | 1 | 0 | 2.949049  | -0.261498 | 1.827415  |
| 29 | 1 | 0 | 3.257059  | 1.254336  | 0.794629  |

## IXb

Zero-point correction= 0.263416  
(Hartree/Particle)  
Thermal correction to Energy= 0.283174  
Thermal correction to Enthalpy= 0.284118  
Thermal correction to Gibbs Free Energy= 0.214527  
Sum of electronic and zero-point Energies= -1477.326287  
Sum of electronic and thermal Energies= -1477.306529  
Sum of electronic and thermal Enthalpies= -1477.305585  
Sum of electronic and thermal Free Energies= -1477.375176

| Center<br>Number | Atomic<br>Number | Atomic<br>Type | Coordinates (Angstroms) |           |           |
|------------------|------------------|----------------|-------------------------|-----------|-----------|
|                  |                  |                | X                       | Y         | Z         |
| 1                | 17               | 0              | -0.693007               | -1.944219 | -1.306998 |
| 2                | 44               | 0              | -0.568395               | 0.123347  | -0.001362 |
| 3                | 6                | 0              | -1.095330               | -0.680432 | 1.542573  |
| 4                | 17               | 0              | -0.477652               | 2.308997  | 1.112847  |
| 5                | 6                | 0              | 1.463245                | -0.050822 | 0.038041  |
| 6                | 6                | 0              | 3.653196                | 0.333063  | -0.675490 |
| 7                | 7                | 0              | 2.259960                | 0.795277  | -0.649396 |
| 8                | 7                | 0              | 2.235423                | -0.977272 | 0.632320  |
| 9                | 6                | 0              | 3.666675                | -0.679305 | 0.476984  |
| 10               | 6                | 0              | 1.784480                | -2.046771 | 1.502742  |
| 11               | 6                | 0              | 1.806712                | 1.807220  | -1.587113 |
| 12               | 1                | 0              | -1.418490               | -1.728196 | 1.559800  |
| 13               | 1                | 0              | -1.152781               | -0.122240 | 2.485016  |
| 14               | 1                | 0              | 4.341868                | 1.169414  | -0.523251 |
| 15               | 1                | 0              | 3.880991                | -0.136753 | -1.643409 |
| 16               | 1                | 0              | 4.070280                | -0.246283 | 1.403187  |
| 17               | 1                | 0              | 4.228778                | -1.588162 | 0.243814  |
| 18               | 1                | 0              | 1.612477                | -1.696517 | 2.529501  |
| 19               | 1                | 0              | 0.870739                | -2.479198 | 1.094587  |
| 20               | 1                | 0              | 2.555672                | -2.822644 | 1.524328  |
| 21               | 1                | 0              | 0.861291                | 2.226192  | -1.235031 |

|    |   |   |           |           |           |
|----|---|---|-----------|-----------|-----------|
| 22 | 1 | 0 | 1.693179  | 1.398328  | -2.601059 |
| 23 | 1 | 0 | 2.539071  | 2.620363  | -1.615947 |
| 24 | 6 | 0 | -3.166959 | 0.354333  | 0.053965  |
| 25 | 6 | 0 | -2.530839 | 0.841860  | -1.058842 |
| 26 | 6 | 0 | -3.936712 | -0.937992 | 0.075166  |
| 27 | 1 | 0 | -3.271827 | 1.023235  | 0.905985  |
| 28 | 1 | 0 | -2.530179 | 0.267077  | -1.982097 |
| 29 | 1 | 0 | -2.248547 | 1.890675  | -1.098368 |
| 30 | 1 | 0 | -3.975551 | -1.379694 | 1.075041  |
| 31 | 1 | 0 | -3.507806 | -1.663866 | -0.621104 |
| 32 | 1 | 0 | -4.973095 | -0.733175 | -0.229130 |

**IXc**

Zero-point correction= 0.320249  
(Hartree/Particle)  
Thermal correction to Energy= 0.342718  
Thermal correction to Enthalpy= 0.343662  
Thermal correction to Gibbs Free Energy= 0.267010  
Sum of electronic and zero-point Energies= -1555.894156  
Sum of electronic and thermal Energies= -1555.871687  
Sum of electronic and thermal Enthalpies= -1555.870743  
Sum of electronic and thermal Free Energies= -1555.947395

| Center<br>Number | Atomic<br>Number | Atomic<br>Type | Coordinates (Angstroms) |           |           |
|------------------|------------------|----------------|-------------------------|-----------|-----------|
|                  |                  |                | X                       | Y         | Z         |
| 1                | 17               | 0              | -0.371242               | 1.820201  | -1.376012 |
| 2                | 44               | 0              | -0.106362               | -0.061412 | 0.176075  |
| 3                | 6                | 0              | -0.653147               | -1.275653 | -1.060909 |
| 4                | 17               | 0              | 0.164535                | -1.764797 | 1.910448  |
| 5                | 6                | 0              | 1.895841                | 0.004755  | -0.118651 |
| 6                | 6                | 0              | 3.988292                | 1.010948  | 0.130022  |
| 7                | 7                | 0              | 2.607313                | 0.892390  | 0.609618  |
| 8                | 7                | 0              | 2.739445                | -0.648437 | -0.941345 |
| 9                | 6                | 0              | 4.140827                | -0.287375 | -0.669932 |
| 10               | 6                | 0              | 2.467878                | -1.862567 | -1.682660 |
| 11               | 6                | 0              | 2.005261                | 1.937843  | 1.420027  |
| 12               | 6                | 0              | -2.708954               | -0.166373 | 0.670179  |
| 13               | 6                | 0              | -1.968248               | 0.757184  | 1.356986  |
| 14               | 6                | 0              | -3.657843               | 0.186430  | -0.454086 |
| 15               | 6                | 0              | -4.034225               | -1.023062 | -1.320709 |
| 16               | 6                | 0              | -4.932914               | 0.810637  | 0.163917  |
| 17               | 1                | 0              | -0.907377               | -0.966567 | -2.082155 |
| 18               | 1                | 0              | -0.778314               | -2.335786 | -0.807306 |
| 19               | 1                | 0              | 4.689713                | 1.088717  | 0.965968  |
| 20               | 1                | 0              | 4.095998                | 1.901851  | -0.505460 |
| 21               | 1                | 0              | 4.624231                | -1.080423 | -0.081314 |
| 22               | 1                | 0              | 4.696310                | -0.157175 | -1.603199 |
| 23               | 1                | 0              | 2.710074                | -2.755760 | -1.090949 |
| 24               | 1                | 0              | 1.414212                | -1.895001 | -1.956640 |
| 25               | 1                | 0              | 3.068222                | -1.865463 | -2.598382 |
| 26               | 1                | 0              | 1.149785                | 1.528233  | 1.968134  |
| 27               | 1                | 0              | 1.673038                | 2.786814  | 0.810810  |
| 28               | 1                | 0              | 2.734119                | 2.274273  | 2.163671  |
| 29               | 1                | 0              | -2.755326               | -1.178451 | 1.072096  |
| 30               | 1                | 0              | -1.996636               | 1.805256  | 1.068066  |
| 31               | 1                | 0              | -1.550298               | 0.496531  | 2.326441  |
| 32               | 1                | 0              | -3.172982               | 0.948291  | -1.076848 |

|    |   |   |           |           |           |
|----|---|---|-----------|-----------|-----------|
| 33 | 1 | 0 | -4.501147 | -1.811561 | -0.716237 |
| 34 | 1 | 0 | -3.160361 | -1.454972 | -1.818693 |
| 35 | 1 | 0 | -4.750301 | -0.731331 | -2.096737 |
| 36 | 1 | 0 | -4.697112 | 1.711957  | 0.738292  |
| 37 | 1 | 0 | -5.437157 | 0.102889  | 0.833707  |
| 38 | 1 | 0 | -5.638661 | 1.083678  | -0.628969 |

---

## IXd

Zero-point correction= 0.291852  
(Hartree/Particle)  
Thermal correction to Energy= 0.313041  
Thermal correction to Enthalpy= 0.313985  
Thermal correction to Gibbs Free Energy= 0.241932  
Sum of electronic and zero-point Energies= -1516.612817  
Sum of electronic and thermal Energies= -1516.591628  
Sum of electronic and thermal Enthalpies= -1516.590684  
Sum of electronic and thermal Free Energies= -1516.662736

---

| Center<br>Number | Atomic<br>Number | Atomic<br>Type | Coordinates (Angstroms) |           |           |
|------------------|------------------|----------------|-------------------------|-----------|-----------|
|                  |                  |                | X                       | Y         | Z         |
| 1                | 17               | 0              | 0.349899                | -1.965657 | 1.481601  |
| 2                | 44               | 0              | 0.487653                | -0.074123 | -0.087626 |
| 3                | 6                | 0              | 0.720843                | -1.155543 | -1.525690 |
| 4                | 17               | 0              | 0.611555                | 1.887304  | -1.575828 |
| 5                | 6                | 0              | -1.557090               | 0.045571  | -0.054546 |
| 6                | 6                | 0              | -3.650176               | 0.881535  | 0.566167  |
| 7                | 7                | 0              | -2.208168               | 1.124505  | 0.433236  |
| 8                | 7                | 0              | -2.471711               | -0.871880 | -0.418487 |
| 9                | 6                | 0              | -3.843173               | -0.352652 | -0.321976 |
| 10               | 6                | 0              | -2.211066               | -2.155158 | -1.044564 |
| 11               | 6                | 0              | -1.605965               | 2.261988  | 1.104784  |
| 12               | 1                | 0              | 0.832778                | -2.240389 | -1.407651 |
| 13               | 1                | 0              | 0.818042                | -0.749046 | -2.539072 |
| 14               | 1                | 0              | -4.221089               | 1.751183  | 0.227320  |
| 15               | 1                | 0              | -3.907470               | 0.682326  | 1.616680  |
| 16               | 1                | 0              | -4.223544               | -0.090125 | -1.319422 |
| 17               | 1                | 0              | -4.510192               | -1.099154 | 0.118703  |
| 18               | 1                | 0              | -2.019496               | -2.054182 | -2.121696 |
| 19               | 1                | 0              | -1.363435               | -2.631112 | -0.551044 |
| 20               | 1                | 0              | -3.092522               | -2.788715 | -0.907674 |
| 21               | 1                | 0              | -0.630537               | 2.467254  | 0.660629  |
| 22               | 1                | 0              | -1.512822               | 2.089642  | 2.186848  |
| 23               | 1                | 0              | -2.237135               | 3.142236  | 0.945330  |
| 24               | 6                | 0              | 3.040063                | -0.396148 | 0.177659  |
| 25               | 6                | 0              | 2.597462                | 0.771372  | 0.734036  |
| 26               | 6                | 0              | 2.192939                | 0.939243  | 2.179182  |
| 27               | 6                | 0              | 3.807396                | -0.450159 | -1.118964 |
| 28               | 1                | 0              | 2.992476                | -1.306858 | 0.771875  |
| 29               | 1                | 0              | 2.723945                | 1.688161  | 0.160871  |
| 30               | 1                | 0              | 2.069668                | -0.020186 | 2.685548  |
| 31               | 1                | 0              | 1.258147                | 1.508717  | 2.283288  |
| 32               | 1                | 0              | 2.962701                | 1.528404  | 2.697924  |
| 33               | 1                | 0              | 4.884321                | -0.418248 | -0.898842 |
| 34               | 1                | 0              | 3.565363                | 0.401376  | -1.761464 |
| 35               | 1                | 0              | 3.621096                | -1.376564 | -1.670530 |

---

## TS (IX-X) a

Zero-point correction= 0.234485  
(Hartree/Particle)  
Thermal correction to Energy= 0.252245  
Thermal correction to Enthalpy= 0.253189  
Thermal correction to Gibbs Free Energy= 0.187363  
Sum of electronic and zero-point Energies= -1438.036329  
Sum of electronic and thermal Energies= -1438.018569  
Sum of electronic and thermal Enthalpies= -1438.017625  
Sum of electronic and thermal Free Energies= -1438.083451

---

| Center<br>Number | Atomic<br>Number | Atomic<br>Type | Coordinates (Angstroms) |           |           |
|------------------|------------------|----------------|-------------------------|-----------|-----------|
|                  |                  |                | X                       | Y         | Z         |
| 1                | 17               | 0              | 0.681602                | -2.021782 | 1.367584  |
| 2                | 44               | 0              | 0.790916                | -0.039469 | -0.036812 |
| 3                | 6                | 0              | 1.019757                | -0.880508 | -1.634746 |
| 4                | 17               | 0              | 0.949603                | 2.179946  | -1.067457 |
| 5                | 6                | 0              | -1.246838               | 0.058405  | -0.044230 |
| 6                | 6                | 0              | -3.357169               | 0.727731  | 0.710174  |
| 7                | 7                | 0              | -1.916473               | 1.003569  | 0.650477  |
| 8                | 7                | 0              | -2.147676               | -0.771078 | -0.606432 |
| 9                | 6                | 0              | -3.527250               | -0.304000 | -0.411557 |
| 10               | 6                | 0              | -1.881759               | -1.920432 | -1.447993 |
| 11               | 6                | 0              | -1.327817               | 1.949079  | 1.583426  |
| 12               | 1                | 0              | 1.529082                | -1.849833 | -1.710788 |
| 13               | 1                | 0              | 0.681774                | -0.435880 | -2.579136 |
| 14               | 1                | 0              | -3.933765               | 1.642881  | 0.545374  |
| 15               | 1                | 0              | -3.625106               | 0.319345  | 1.695400  |
| 16               | 1                | 0              | -3.911629               | 0.147846  | -1.336846 |
| 17               | 1                | 0              | -4.181478               | -1.136334 | -0.135191 |
| 18               | 1                | 0              | -1.867828               | -1.655462 | -2.514278 |
| 19               | 1                | 0              | -0.930723               | -2.366610 | -1.157929 |
| 20               | 1                | 0              | -2.670786               | -2.662359 | -1.286354 |
| 21               | 1                | 0              | -0.340617               | 2.244272  | 1.223843  |
| 22               | 1                | 0              | -1.260696               | 1.526069  | 2.595674  |
| 23               | 1                | 0              | -1.951285               | 2.848196  | 1.618708  |
| 24               | 6                | 0              | 3.322455                | -0.272014 | -0.142983 |
| 25               | 6                | 0              | 2.934003                | 0.397103  | 0.975207  |
| 26               | 1                | 0              | 3.599900                | 0.263456  | -1.045540 |
| 27               | 1                | 0              | 3.470428                | -1.347322 | -0.123967 |
| 28               | 1                | 0              | 2.786877                | -0.133615 | 1.911654  |
| 29               | 1                | 0              | 2.911796                | 1.483555  | 0.984851  |

---

## TS (IX-X) b

Zero-point correction= 0.264215  
(Hartree/Particle)  
Thermal correction to Energy= 0.282723  
Thermal correction to Enthalpy= 0.283667  
Thermal correction to Gibbs Free Energy= 0.216909  
Sum of electronic and zero-point Energies= -1477.324812  
Sum of electronic and thermal Energies= -1477.306304  
Sum of electronic and thermal Enthalpies= -1477.305360  
Sum of electronic and thermal Free Energies= -1477.372118

---

| Center<br>Number | Atomic<br>Number | Atomic<br>Type | Coordinates (Angstroms) |           |           |
|------------------|------------------|----------------|-------------------------|-----------|-----------|
|                  |                  |                | X                       | Y         | Z         |
| 1                | 17               | 0              | -0.705601               | -1.964762 | -1.267121 |
| 2                | 44               | 0              | -0.575175               | 0.129473  | -0.004812 |
| 3                | 6                | 0              | -1.394971               | -0.579981 | 1.477605  |
| 4                | 17               | 0              | -0.408678               | 2.317941  | 1.094380  |
| 5                | 6                | 0              | 1.465777                | -0.067114 | 0.027468  |
| 6                | 6                | 0              | 3.668534                | 0.249100  | -0.673916 |
| 7                | 7                | 0              | 2.279951                | 0.726692  | -0.695186 |
| 8                | 7                | 0              | 2.212650                | -0.970892 | 0.682228  |
| 9                | 6                | 0              | 3.650604                | -0.703564 | 0.529865  |
| 10               | 6                | 0              | 1.734781                | -1.957511 | 1.631946  |
| 11               | 6                | 0              | 1.845118                | 1.705253  | -1.675532 |
| 12               | 1                | 0              | -1.724701               | -1.623770 | 1.499841  |
| 13               | 1                | 0              | -1.549825               | 0.017061  | 2.382569  |
| 14               | 1                | 0              | 4.364318                | 1.084646  | -0.552438 |
| 15               | 1                | 0              | 3.906906                | -0.272109 | -1.612234 |
| 16               | 1                | 0              | 4.049100                | -0.230596 | 1.438528  |
| 17               | 1                | 0              | 4.199835                | -1.632643 | 0.351527  |
| 18               | 1                | 0              | 1.686833                | -1.551940 | 2.651719  |
| 19               | 1                | 0              | 0.749147                | -2.301330 | 1.319647  |
| 20               | 1                | 0              | 2.419553                | -2.811448 | 1.624845  |
| 21               | 1                | 0              | 0.894517                | 2.137017  | -1.353097 |
| 22               | 1                | 0              | 1.744140                | 1.261152  | -2.675555 |
| 23               | 1                | 0              | 2.578733                | 2.516520  | -1.722092 |
| 24               | 6                | 0              | -3.048622               | 0.334458  | 0.089138  |
| 25               | 6                | 0              | -2.388550               | 0.879676  | -1.020635 |
| 26               | 6                | 0              | -3.903880               | -0.905137 | -0.023361 |
| 27               | 1                | 0              | -3.250283               | 1.016627  | 0.912308  |
| 28               | 1                | 0              | -2.432989               | 0.345755  | -1.968008 |
| 29               | 1                | 0              | -2.198323               | 1.949090  | -1.042665 |
| 30               | 1                | 0              | -4.131398               | -1.344855 | 0.951712  |
| 31               | 1                | 0              | -3.417649               | -1.655527 | -0.652991 |
| 32               | 1                | 0              | -4.858448               | -0.626165 | -0.490060 |

### TS (IX-X) c

|                                              |              |
|----------------------------------------------|--------------|
| Zero-point correction=                       | 0.321102     |
| (Hartree/Particle)                           |              |
| Thermal correction to Energy=                | 0.342374     |
| Thermal correction to Enthalpy=              | 0.343318     |
| Thermal correction to Gibbs Free Energy=     | 0.269561     |
| Sum of electronic and zero-point Energies=   | -1555.891484 |
| Sum of electronic and thermal Energies=      | -1555.870212 |
| Sum of electronic and thermal Enthalpies=    | -1555.869268 |
| Sum of electronic and thermal Free Energies= | -1555.943025 |

| Center<br>Number | Atomic<br>Number | Atomic<br>Type | Coordinates (Angstroms) |           |           |
|------------------|------------------|----------------|-------------------------|-----------|-----------|
|                  |                  |                | X                       | Y         | Z         |
| 1                | 17               | 0              | -0.369255               | 1.934129  | -1.190728 |
| 2                | 44               | 0              | -0.114252               | -0.081199 | 0.182883  |
| 3                | 6                | 0              | -1.032049               | -1.138726 | -1.009754 |
| 4                | 17               | 0              | 0.219239                | -1.970611 | 1.703098  |
| 5                | 6                | 0              | 1.904434                | 0.028271  | -0.114105 |
| 6                | 6                | 0              | 4.029845                | 0.952691  | 0.134599  |

|    |   |   |           |           |           |
|----|---|---|-----------|-----------|-----------|
| 7  | 7 | 0 | 2.663039  | 0.830495  | 0.656887  |
| 8  | 7 | 0 | 2.688804  | -0.572748 | -1.023964 |
| 9  | 6 | 0 | 4.110104  | -0.263991 | -0.797411 |
| 10 | 6 | 0 | 2.332137  | -1.698074 | -1.864847 |
| 11 | 6 | 0 | 2.121746  | 1.814130  | 1.579423  |
| 12 | 6 | 0 | -2.556014 | -0.304140 | 0.514679  |
| 13 | 6 | 0 | -1.823410 | 0.527127  | 1.387423  |
| 14 | 6 | 0 | -3.595455 | 0.258389  | -0.450949 |
| 15 | 6 | 0 | -4.231540 | -0.822964 | -1.338068 |
| 16 | 6 | 0 | -4.701878 | 0.963591  | 0.367699  |
| 17 | 1 | 0 | -1.392335 | -0.718628 | -1.952841 |
| 18 | 1 | 0 | -1.177289 | -2.210563 | -0.840579 |
| 19 | 1 | 0 | 4.764402  | 0.925043  | 0.944842  |
| 20 | 1 | 0 | 4.143352  | 1.899686  | -0.412187 |
| 21 | 1 | 0 | 4.605377  | -1.120647 | -0.318435 |
| 22 | 1 | 0 | 4.618135  | -0.050905 | -1.742591 |
| 23 | 1 | 0 | 2.704969  | -2.639467 | -1.439208 |
| 24 | 1 | 0 | 1.247941  | -1.752920 | -1.946779 |
| 25 | 1 | 0 | 2.761638  | -1.562039 | -2.863435 |
| 26 | 1 | 0 | 1.240083  | 1.399726  | 2.078160  |
| 27 | 1 | 0 | 1.841550  | 2.742096  | 1.066649  |
| 28 | 1 | 0 | 2.866840  | 2.026824  | 2.352297  |
| 29 | 1 | 0 | -2.704868 | -1.328536 | 0.854496  |
| 30 | 1 | 0 | -1.914285 | 1.605729  | 1.278904  |
| 31 | 1 | 0 | -1.553532 | 0.136787  | 2.365598  |
| 32 | 1 | 0 | -3.104997 | 1.013407  | -1.076876 |
| 33 | 1 | 0 | -4.706772 | -1.600841 | -0.726254 |
| 34 | 1 | 0 | -3.503848 | -1.311981 | -1.992708 |
| 35 | 1 | 0 | -5.007205 | -0.384649 | -1.975335 |
| 36 | 1 | 0 | -4.300362 | 1.791678  | 0.959328  |
| 37 | 1 | 0 | -5.195820 | 0.263533  | 1.053391  |
| 38 | 1 | 0 | -5.466056 | 1.367560  | -0.306142 |

## TS (IX-X) d

|                                              |              |
|----------------------------------------------|--------------|
| Zero-point correction=                       | 0.292480     |
| (Hartree/Particle)                           |              |
| Thermal correction to Energy=                | 0.312502     |
| Thermal correction to Enthalpy=              | 0.313446     |
| Thermal correction to Gibbs Free Energy=     | 0.243474     |
| Sum of electronic and zero-point Energies=   | -1516.609265 |
| Sum of electronic and thermal Energies=      | -1516.589242 |
| Sum of electronic and thermal Enthalpies=    | -1516.588298 |
| Sum of electronic and thermal Free Energies= | -1516.658271 |

| Center<br>Number | Atomic<br>Number | Atomic<br>Type | Coordinates (Angstroms) |           |           |
|------------------|------------------|----------------|-------------------------|-----------|-----------|
|                  |                  |                | X                       | Y         | Z         |
| 1                | 17               | 0              | -0.285999               | 2.155976  | 1.222229  |
| 2                | 44               | 0              | -0.473671               | 0.063010  | -0.056304 |
| 3                | 6                | 0              | -1.170214               | 0.994902  | -1.477847 |
| 4                | 17               | 0              | -0.562030               | -2.051638 | -1.310991 |
| 5                | 6                | 0              | 1.575654                | -0.060373 | -0.043140 |
| 6                | 6                | 0              | 3.689746                | -0.762252 | 0.655428  |
| 7                | 7                | 0              | 2.243215                | -1.014724 | 0.635398  |
| 8                | 7                | 0              | 2.466755                | 0.753423  | -0.632110 |
| 9                | 6                | 0              | 3.842647                | 0.256661  | -0.482646 |
| 10               | 6                | 0              | 2.168568                | 1.845685  | -1.539430 |



|    |   |   |           |           |           |
|----|---|---|-----------|-----------|-----------|
| 11 | 6 | 0 | 1.642454  | -1.975974 | 1.541248  |
| 12 | 1 | 0 | -1.311450 | 2.080311  | -1.436807 |
| 13 | 1 | 0 | -1.425162 | 0.489861  | -2.414008 |
| 14 | 1 | 0 | 4.247460  | -1.687800 | 0.483490  |
| 15 | 1 | 0 | 3.992090  | -0.346998 | 1.627635  |
| 16 | 1 | 0 | 4.181744  | -0.213407 | -1.416681 |
| 17 | 1 | 0 | 4.525089  | 1.076004  | -0.238094 |
| 18 | 1 | 0 | 2.087475  | 1.499327  | -2.578861 |
| 19 | 1 | 0 | 1.239116  | 2.322037  | -1.229244 |
| 20 | 1 | 0 | 2.974632  | 2.583463  | -1.475643 |
| 21 | 1 | 0 | 0.650160  | -2.243450 | 1.170145  |
| 22 | 1 | 0 | 1.576554  | -1.584752 | 2.566301  |
| 23 | 1 | 0 | 2.249211  | -2.887149 | 1.550907  |
| 24 | 6 | 0 | -2.910198 | 0.340905  | -0.100363 |
| 25 | 6 | 0 | -2.409216 | -0.562359 | 0.857242  |
| 26 | 6 | 0 | -2.359626 | -0.268271 | 2.340987  |
| 27 | 6 | 0 | -3.754445 | -0.152916 | -1.257757 |
| 28 | 1 | 0 | -3.068591 | 1.365384  | 0.232531  |
| 29 | 1 | 0 | -2.491407 | -1.616668 | 0.591012  |
| 30 | 1 | 0 | -2.261810 | 0.798602  | 2.545979  |
| 31 | 1 | 0 | -1.525966 | -0.787386 | 2.829139  |
| 32 | 1 | 0 | -3.283024 | -0.646280 | 2.805228  |
| 33 | 1 | 0 | -4.762700 | -0.372835 | -0.880390 |
| 34 | 1 | 0 | -3.340051 | -1.073178 | -1.679428 |
| 35 | 1 | 0 | -3.857342 | 0.591798  | -2.052213 |

## Xa

Zero-point correction= 0.238769  
(Hartree/Particle)  
Thermal correction to Energy= 0.255770  
Thermal correction to Enthalpy= 0.256714  
Thermal correction to Gibbs Free Energy= 0.192775  
Sum of electronic and zero-point Energies= -1438.053069  
Sum of electronic and thermal Energies= -1438.036069  
Sum of electronic and thermal Enthalpies= -1438.035124  
Sum of electronic and thermal Free Energies= -1438.099064

| Center<br>Number | Atomic<br>Number | Atomic<br>Type | Coordinates (Angstroms) |           |           |
|------------------|------------------|----------------|-------------------------|-----------|-----------|
|                  |                  |                | X                       | Y         | Z         |
| 1                | 17               | 0              | -0.733690               | 2.146940  | 1.155060  |
| 2                | 44               | 0              | -0.769905               | 0.000067  | -0.000092 |
| 3                | 6                | 0              | -2.216107               | 0.644235  | -1.181734 |
| 4                | 17               | 0              | -0.735283               | -2.146840 | -1.155088 |
| 5                | 6                | 0              | 1.256169                | -0.000224 | -0.000199 |
| 6                | 6                | 0              | 3.448063                | -0.415287 | 0.647997  |
| 7                | 7                | 0              | 2.027675                | -0.771381 | 0.778892  |
| 8                | 7                | 0              | 2.028153                | 0.770549  | -0.779151 |
| 9                | 6                | 0              | 3.448419                | 0.414241  | -0.647590 |
| 10               | 6                | 0              | 1.558616                | 1.638676  | -1.843639 |
| 11               | 6                | 0              | 1.557264                | -1.638962 | 1.843491  |
| 12               | 6                | 0              | -3.050380               | 0.000342  | 0.000110  |
| 13               | 6                | 0              | -2.216023               | -0.642971 | 1.182241  |
| 14               | 1                | 0              | -2.324484               | 1.726713  | -1.240483 |
| 15               | 1                | 0              | -2.317751               | 0.106406  | -2.123692 |
| 16               | 1                | 0              | 4.066826                | -1.315052 | 0.582126  |
| 17               | 1                | 0              | 3.774048                | 0.172279  | 1.517444  |
| 18               | 1                | 0              | 3.774683                | -0.173340 | -1.516923 |

|    |   |   |           |           |           |
|----|---|---|-----------|-----------|-----------|
| 19 | 1 | 0 | 4.067297  | 1.313909  | -0.581434 |
| 20 | 1 | 0 | 1.577149  | 1.129387  | -2.816273 |
| 21 | 1 | 0 | 0.542236  | 1.963590  | -1.614657 |
| 22 | 1 | 0 | 2.198362  | 2.525699  | -1.892617 |
| 23 | 1 | 0 | 0.542427  | -1.966966 | 1.611975  |
| 24 | 1 | 0 | 1.571644  | -1.128179 | 2.815407  |
| 25 | 1 | 0 | 2.199261  | -2.524155 | 1.895656  |
| 26 | 1 | 0 | -3.643893 | -0.803161 | -0.437723 |
| 27 | 1 | 0 | -3.644304 | 0.803595  | 0.437880  |
| 28 | 1 | 0 | -2.317286 | -0.104483 | 2.123862  |
| 29 | 1 | 0 | -2.324761 | -1.725374 | 1.241727  |

**Xb**

Zero-point correction= 0.267120  
(Hartree/Particle)  
Thermal correction to Energy= 0.285432  
Thermal correction to Enthalpy= 0.286376  
Thermal correction to Gibbs Free Energy= 0.219843  
Sum of electronic and zero-point Energies= -1477.337541  
Sum of electronic and thermal Energies= -1477.319229  
Sum of electronic and thermal Enthalpies= -1477.318285  
Sum of electronic and thermal Free Energies= -1477.384818

| Center<br>Number | Atomic<br>Number | Atomic<br>Type | Coordinates (Angstroms) |           |           |
|------------------|------------------|----------------|-------------------------|-----------|-----------|
|                  |                  |                | X                       | Y         | Z         |
| 1                | 17               | 0              | 0.697224                | -2.113790 | 0.993874  |
| 2                | 44               | 0              | 0.556261                | 0.091141  | -0.042658 |
| 3                | 6                | 0              | 2.015245                | -0.346058 | -1.303268 |
| 4                | 17               | 0              | 0.312627                | 2.286129  | -1.079158 |
| 5                | 6                | 0              | -1.459808               | -0.063649 | 0.021530  |
| 6                | 6                | 0              | -3.648126               | 0.140625  | 0.771501  |
| 7                | 7                | 0              | -2.254302               | 0.596741  | 0.875869  |
| 8                | 7                | 0              | -2.203067               | -0.838067 | -0.781080 |
| 9                | 6                | 0              | -3.638989               | -0.595986 | -0.579082 |
| 10               | 6                | 0              | -1.711236               | -1.596093 | -1.917088 |
| 11               | 6                | 0              | -1.801819               | 1.420172  | 1.982698  |
| 12               | 1                | 0              | 2.225633                | -1.410046 | -1.420384 |
| 13               | 1                | 0              | 2.021013                | 0.235791  | -2.224577 |
| 14               | 1                | 0              | -4.335023               | 0.991740  | 0.791928  |
| 15               | 1                | 0              | -3.892880               | -0.529072 | 1.607678  |
| 16               | 1                | 0              | -4.038040               | 0.024873  | -1.393249 |
| 17               | 1                | 0              | -4.189961               | -1.540836 | -0.557384 |
| 18               | 1                | 0              | -1.798455               | -1.024796 | -2.850726 |
| 19               | 1                | 0              | -0.667205               | -1.861562 | -1.741573 |
| 20               | 1                | 0              | -2.288495               | -2.521750 | -2.008458 |
| 21               | 1                | 0              | -0.839247               | 1.864694  | 1.723056  |
| 22               | 1                | 0              | -1.705266               | 0.835860  | 2.907213  |
| 23               | 1                | 0              | -2.520357               | 2.230003  | 2.143620  |
| 24               | 6                | 0              | 2.856097                | 0.327593  | -0.135973 |
| 25               | 6                | 0              | 1.994314                | 0.793389  | 1.115104  |
| 26               | 6                | 0              | 3.967473                | -0.628307 | 0.324079  |
| 27               | 1                | 0              | 3.229463                | 1.258099  | -0.570820 |
| 28               | 1                | 0              | 2.187987                | 0.204611  | 2.012579  |
| 29               | 1                | 0              | 2.000789                | 1.874220  | 1.254246  |
| 30               | 1                | 0              | 4.608624                | -0.904203 | -0.520026 |
| 31               | 1                | 0              | 3.530167                | -1.538017 | 0.745973  |
| 32               | 1                | 0              | 4.590994                | -0.150394 | 1.087170  |

-----  
**Xc**

Zero-point correction= 0.323599  
(Hartree/Particle)  
Thermal correction to Energy= 0.344910  
Thermal correction to Enthalpy= 0.345854  
Thermal correction to Gibbs Free Energy= 0.271282  
Sum of electronic and zero-point Energies= -1555.904583  
Sum of electronic and thermal Energies= -1555.883272  
Sum of electronic and thermal Enthalpies= -1555.882328  
Sum of electronic and thermal Free Energies= -1555.956900

-----

| Center<br>Number | Atomic<br>Number | Atomic<br>Type | Coordinates (Angstroms) |           |           |
|------------------|------------------|----------------|-------------------------|-----------|-----------|
|                  |                  |                | X                       | Y         | Z         |
| 1                | 17               | 0              | -0.244602               | -1.867386 | 1.323543  |
| 2                | 44               | 0              | -0.093039               | 0.129199  | -0.090926 |
| 3                | 6                | 0              | -1.546300               | 0.992697  | 0.929907  |
| 4                | 17               | 0              | 0.179737                | 2.096688  | -1.489023 |
| 5                | 6                | 0              | 1.909822                | -0.067590 | 0.042972  |
| 6                | 6                | 0              | 4.053296                | -0.880366 | -0.304452 |
| 7                | 7                | 0              | 2.668295                | -0.793071 | -0.792455 |
| 8                | 7                | 0              | 2.680612                | 0.502442  | 0.979561  |
| 9                | 6                | 0              | 4.107181                | 0.283181  | 0.698182  |
| 10               | 6                | 0              | 2.247331                | 1.539176  | 1.900032  |
| 11               | 6                | 0              | 2.154638                | -1.752125 | -1.756473 |
| 12               | 6                | 0              | -2.396683               | 0.373532  | -0.262055 |
| 13               | 6                | 0              | -1.551066               | -0.566939 | -1.225049 |
| 14               | 6                | 0              | -3.636998               | -0.390552 | 0.292671  |
| 15               | 6                | 0              | -4.497299               | 0.520921  | 1.183961  |
| 16               | 6                | 0              | -4.504036               | -0.943886 | -0.850704 |
| 17               | 1                | 0              | -1.746453               | 0.531837  | 1.896965  |
| 18               | 1                | 0              | -1.543293               | 2.082611  | 0.923800  |
| 19               | 1                | 0              | 4.764787                | -0.773374 | -1.128158 |
| 20               | 1                | 0              | 4.218523                | -1.851927 | 0.182244  |
| 21               | 1                | 0              | 4.547044                | 1.188855  | 0.257368  |
| 22               | 1                | 0              | 4.652002                | 0.037890  | 1.614408  |
| 23               | 1                | 0              | 2.433079                | 2.540317  | 1.490593  |
| 24               | 1                | 0              | 1.179090                | 1.426161  | 2.093088  |
| 25               | 1                | 0              | 2.783643                | 1.427604  | 2.847793  |
| 26               | 1                | 0              | 1.194072                | -1.401779 | -2.138707 |
| 27               | 1                | 0              | 2.019588                | -2.741935 | -1.302503 |
| 28               | 1                | 0              | 2.853535                | -1.825287 | -2.595501 |
| 29               | 1                | 0              | -2.687718               | 1.228152  | -0.880064 |
| 30               | 1                | 0              | -1.755751               | -1.628958 | -1.093483 |
| 31               | 1                | 0              | -1.545021               | -0.216328 | -2.257213 |
| 32               | 1                | 0              | -3.257498               | -1.226803 | 0.893517  |
| 33               | 1                | 0              | -4.852367               | 1.395204  | 0.622848  |
| 34               | 1                | 0              | -3.952694               | 0.882786  | 2.061196  |
| 35               | 1                | 0              | -5.379089               | -0.023042 | 1.541471  |
| 36               | 1                | 0              | -3.964091               | -1.659744 | -1.477859 |
| 37               | 1                | 0              | -4.863129               | -0.132638 | -1.497400 |
| 38               | 1                | 0              | -5.383506               | -1.456359 | -0.444167 |

-----

**Xd**

Zero-point correction= 0.295270  
 (Hartree/Particle)  
 Thermal correction to Energy= 0.315236  
 Thermal correction to Enthalpy= 0.316180  
 Thermal correction to Gibbs Free Energy= 0.246201  
 Sum of electronic and zero-point Energies= -1516.624357  
 Sum of electronic and thermal Energies= -1516.604392  
 Sum of electronic and thermal Enthalpies= -1516.603447  
 Sum of electronic and thermal Free Energies= -1516.673426

| Center<br>Number | Atomic<br>Number | Atomic<br>Type | Coordinates (Angstroms) |           |           |
|------------------|------------------|----------------|-------------------------|-----------|-----------|
|                  |                  |                | X                       | Y         | Z         |
| 1                | 17               | 0              | -0.288634               | 2.314245  | 0.919733  |
| 2                | 44               | 0              | -0.448130               | 0.097307  | -0.103094 |
| 3                | 6                | 0              | -1.766506               | 0.796609  | -1.404261 |
| 4                | 17               | 0              | -0.427735               | -2.077592 | -1.234754 |
| 5                | 6                | 0              | 1.565872                | -0.060134 | 0.011665  |
| 6                | 6                | 0              | 3.680349                | -0.614801 | 0.799236  |
| 7                | 7                | 0              | 2.231565                | -0.855133 | 0.862446  |
| 8                | 7                | 0              | 2.438738                | 0.616214  | -0.748879 |
| 9                | 6                | 0              | 3.814513                | 0.146138  | -0.530357 |
| 10               | 6                | 0              | 2.094999                | 1.453041  | -1.884777 |
| 11               | 6                | 0              | 1.634664                | -1.633387 | 1.931942  |
| 12               | 1                | 0              | -1.765676               | 1.880140  | -1.522157 |
| 13               | 1                | 0              | -1.853883               | 0.227927  | -2.330673 |
| 14               | 1                | 0              | 4.229460                | -1.560927 | 0.810812  |
| 15               | 1                | 0              | 4.004059                | -0.009793 | 1.657749  |
| 16               | 1                | 0              | 4.126411                | -0.511281 | -1.353976 |
| 17               | 1                | 0              | 4.507271                | 0.990807  | -0.474355 |
| 18               | 1                | 0              | 2.077117                | 0.876723  | -2.819202 |
| 19               | 1                | 0              | 1.117809                | 1.906530  | -1.709944 |
| 20               | 1                | 0              | 2.833468                | 2.256139  | -1.973040 |
| 21               | 1                | 0              | 0.621868                | -1.918416 | 1.640368  |
| 22               | 1                | 0              | 1.608213                | -1.071702 | 2.875278  |
| 23               | 1                | 0              | 2.217389                | -2.548503 | 2.078065  |
| 24               | 6                | 0              | -2.739872               | 0.300376  | -0.265856 |
| 25               | 6                | 0              | -2.038418               | -0.508193 | 0.929481  |
| 26               | 6                | 0              | -2.349788               | -0.032257 | 2.331504  |
| 27               | 6                | 0              | -3.826588               | -0.600014 | -0.880286 |
| 28               | 1                | 0              | -3.141408               | 1.203216  | 0.200960  |
| 29               | 1                | 0              | -2.195697               | -1.581615 | 0.795663  |
| 30               | 1                | 0              | -2.173064               | 1.037121  | 2.455715  |
| 31               | 1                | 0              | -1.735151               | -0.572960 | 3.060751  |
| 32               | 1                | 0              | -3.400905               | -0.256648 | 2.572596  |
| 33               | 1                | 0              | -4.537714               | -0.923607 | -0.112316 |
| 34               | 1                | 0              | -3.371193               | -1.485388 | -1.333319 |
| 35               | 1                | 0              | -4.379867               | -0.054204 | -1.652206 |

## XIb

Zero-point correction= 0.263335  
 (Hartree/Particle)  
 Thermal correction to Energy= 0.283132  
 Thermal correction to Enthalpy= 0.284077  
 Thermal correction to Gibbs Free Energy= 0.214579  
 Sum of electronic and zero-point Energies= -1477.325146  
 Sum of electronic and thermal Energies= -1477.305349  
 Sum of electronic and thermal Enthalpies= -1477.304405

Sum of electronic and thermal Free Energies= -1477.373903

| Center<br>Number | Atomic<br>Number | Atomic<br>Type | Coordinates (Angstroms) |           |           |
|------------------|------------------|----------------|-------------------------|-----------|-----------|
|                  |                  |                | X                       | Y         | Z         |
| 1                | 17               | 0              | 0.555085                | -2.053463 | 1.294142  |
| 2                | 44               | 0              | 0.651073                | -0.117073 | -0.217521 |
| 3                | 6                | 0              | 0.762207                | -1.141869 | -1.715080 |
| 4                | 17               | 0              | 0.696994                | 1.910361  | -1.616484 |
| 5                | 6                | 0              | -1.371605               | 0.089969  | 0.027786  |
| 6                | 6                | 0              | -3.347061               | 0.960107  | 0.922134  |
| 7                | 7                | 0              | -1.914347               | 1.150644  | 0.662591  |
| 8                | 7                | 0              | -2.360196               | -0.754523 | -0.314047 |
| 9                | 6                | 0              | -3.688522               | -0.190111 | -0.033230 |
| 10               | 6                | 0              | -2.220310               | -1.991020 | -1.061344 |
| 11               | 1                | 0              | 0.843626                | -2.233959 | -1.651151 |
| 12               | 1                | 0              | 0.810782                | -0.693116 | -2.714229 |
| 13               | 1                | 0              | -3.903833               | 1.877548  | 0.708924  |
| 14               | 1                | 0              | -3.510871               | 0.688920  | 1.975149  |
| 15               | 1                | 0              | -4.156265               | 0.167269  | -0.961490 |
| 16               | 1                | 0              | -4.341759               | -0.942796 | 0.417571  |
| 17               | 1                | 0              | -2.111235               | -1.808044 | -2.138950 |
| 18               | 1                | 0              | -1.361185               | -2.545893 | -0.683003 |
| 19               | 1                | 0              | -3.119832               | -2.592511 | -0.900787 |
| 20               | 6                | 0              | 3.101962                | -0.606373 | -0.282055 |
| 21               | 6                | 0              | 2.876446                | 0.578939  | 0.360974  |
| 22               | 6                | 0              | 2.759456                | 0.724723  | 1.858589  |
| 23               | 1                | 0              | 3.408293                | -0.611999 | -1.323568 |
| 24               | 1                | 0              | 3.126002                | -1.549401 | 0.255101  |
| 25               | 1                | 0              | 2.967302                | 1.499422  | -0.210626 |
| 26               | 1                | 0              | 2.618789                | -0.237873 | 2.355236  |
| 27               | 1                | 0              | 1.931885                | 1.389334  | 2.140366  |
| 28               | 1                | 0              | 3.674675                | 1.198539  | 2.240896  |
| 29               | 6                | 0              | -1.184363               | 2.200943  | 1.348991  |
| 30               | 1                | 0              | -0.252920               | 2.398995  | 0.814646  |
| 31               | 1                | 0              | -0.982771               | 1.935997  | 2.396819  |
| 32               | 1                | 0              | -1.780682               | 3.118846  | 1.329444  |

## XIc

Zero-point correction= 0.320473  
(Hartree/Particle)  
Thermal correction to Energy= 0.342974  
Thermal correction to Enthalpy= 0.343918  
Thermal correction to Gibbs Free Energy= 0.267971  
Sum of electronic and zero-point Energies= -1555.891067  
Sum of electronic and thermal Energies= -1555.868566  
Sum of electronic and thermal Enthalpies= -1555.867622  
Sum of electronic and thermal Free Energies= -1555.943569

| Center<br>Number | Atomic<br>Number | Atomic<br>Type | Coordinates (Angstroms) |           |           |
|------------------|------------------|----------------|-------------------------|-----------|-----------|
|                  |                  |                | X                       | Y         | Z         |
| 1                | 17               | 0              | -0.568167               | 0.786145  | 2.340182  |
| 2                | 44               | 0              | -0.204234               | -0.475715 | 0.259519  |
| 3                | 6                | 0              | -2.571510               | -0.612753 | -0.390178 |
| 4                | 17               | 0              | 0.152335                | -1.557975 | -1.919133 |
| 5                | 6                | 0              | -2.498853               | -1.385755 | 0.734548  |

|    |   |   |           |           |           |
|----|---|---|-----------|-----------|-----------|
| 6  | 6 | 0 | 0.127039  | -2.012047 | 1.171932  |
| 7  | 6 | 0 | 1.681419  | 0.309875  | 0.053601  |
| 8  | 6 | 0 | 3.313091  | 1.913418  | -0.454138 |
| 9  | 7 | 0 | 1.890189  | 1.602027  | -0.267164 |
| 10 | 7 | 0 | 2.871600  | -0.325324 | 0.066278  |
| 11 | 6 | 0 | 3.945796  | 0.517927  | -0.482196 |
| 12 | 6 | 0 | 0.933651  | 2.692559  | -0.202855 |
| 13 | 6 | 0 | 3.079918  | -1.763687 | 0.113801  |
| 14 | 6 | 0 | -3.070332 | 0.821811  | -0.418206 |
| 15 | 6 | 0 | -2.489225 | 1.596242  | -1.612872 |
| 16 | 6 | 0 | -4.613736 | 0.811324  | -0.489570 |
| 17 | 1 | 0 | -2.485775 | -1.107234 | -1.356481 |
| 18 | 1 | 0 | -2.420914 | -2.465505 | 0.651584  |
| 19 | 1 | 0 | -2.675452 | -0.971961 | 1.722923  |
| 20 | 1 | 0 | 0.237795  | -2.972970 | 0.654005  |
| 21 | 1 | 0 | 0.164012  | -2.026700 | 2.268588  |
| 22 | 1 | 0 | 3.670515  | 2.521540  | 0.388700  |
| 23 | 1 | 0 | 3.473455  | 2.477436  | -1.378516 |
| 24 | 1 | 0 | 4.851491  | 0.442855  | 0.127251  |
| 25 | 1 | 0 | 4.186225  | 0.194759  | -1.504491 |
| 26 | 1 | 0 | 0.703406  | 3.071170  | -1.206329 |
| 27 | 1 | 0 | 0.025186  | 2.360089  | 0.299324  |
| 28 | 1 | 0 | 1.356555  | 3.511116  | 0.392607  |
| 29 | 1 | 0 | 2.753771  | -2.246385 | -0.813851 |
| 30 | 1 | 0 | 4.145692  | -1.947676 | 0.277345  |
| 31 | 1 | 0 | 2.530077  | -2.193613 | 0.952872  |
| 32 | 1 | 0 | -2.803131 | 1.142838  | -2.560915 |
| 33 | 1 | 0 | -1.393779 | 1.601637  | -1.610910 |
| 34 | 1 | 0 | -2.833675 | 2.636685  | -1.603416 |
| 35 | 1 | 0 | -5.047639 | 0.317743  | 0.386147  |
| 36 | 1 | 0 | -4.964354 | 0.284810  | -1.385989 |
| 37 | 1 | 0 | -4.997529 | 1.837625  | -0.531025 |
| 38 | 1 | 0 | -2.776568 | 1.313900  | 0.516924  |

## XIe

|                                              |              |
|----------------------------------------------|--------------|
| Zero-point correction=                       | 0.348609     |
| (Hartree/Particle)                           |              |
| Thermal correction to Energy=                | 0.372653     |
| Thermal correction to Enthalpy=              | 0.373597     |
| Thermal correction to Gibbs Free Energy=     | 0.294524     |
| Sum of electronic and zero-point Energies=   | -1595.178313 |
| Sum of electronic and thermal Energies=      | -1595.154269 |
| Sum of electronic and thermal Enthalpies=    | -1595.153324 |
| Sum of electronic and thermal Free Energies= | -1595.232398 |

| Center<br>Number | Atomic<br>Number | Atomic<br>Type | Coordinates (Angstroms) |           |           |
|------------------|------------------|----------------|-------------------------|-----------|-----------|
|                  |                  |                | X                       | Y         | Z         |
| 1                | 17               | 0              | -0.417182               | 0.798593  | 2.366015  |
| 2                | 44               | 0              | -0.153935               | -0.370788 | 0.211556  |
| 3                | 17               | 0              | 0.097914                | -1.376963 | -2.017374 |
| 4                | 6                | 0              | 0.069073                | -1.952052 | 1.069896  |
| 5                | 6                | 0              | 1.817030                | 0.202446  | 0.089541  |
| 6                | 6                | 0              | 3.640495                | 1.637097  | -0.244150 |
| 7                | 7                | 0              | 2.187004                | 1.486282  | -0.097213 |
| 8                | 7                | 0              | 2.923421                | -0.570950 | 0.029246  |
| 9                | 6                | 0              | 4.095832                | 0.187945  | -0.433312 |
| 10               | 6                | 0              | 1.385902                | 2.682322  | 0.096985  |

|    |   |   |           |           |           |
|----|---|---|-----------|-----------|-----------|
| 11 | 6 | 0 | 2.963165  | -2.018916 | -0.092933 |
| 12 | 1 | 0 | -0.023563 | -2.905303 | 0.534807  |
| 13 | 1 | 0 | 0.245940  | -2.000495 | 2.151780  |
| 14 | 1 | 0 | 4.055339  | 2.093639  | 0.665702  |
| 15 | 1 | 0 | 3.884218  | 2.281482  | -1.094757 |
| 16 | 1 | 0 | 4.983361  | -0.066753 | 0.153834  |
| 17 | 1 | 0 | 4.297310  | -0.047308 | -1.487832 |
| 18 | 1 | 0 | 1.261964  | 3.222628  | -0.849462 |
| 19 | 1 | 0 | 0.417319  | 2.417773  | 0.518074  |
| 20 | 1 | 0 | 1.887995  | 3.342358  | 0.815432  |
| 21 | 1 | 0 | 2.650640  | -2.345471 | -1.090556 |
| 22 | 1 | 0 | 3.985988  | -2.350153 | 0.110106  |
| 23 | 1 | 0 | 2.304530  | -2.474281 | 0.647530  |
| 24 | 6 | 0 | -2.508158 | -0.129135 | -0.503550 |
| 25 | 6 | 0 | -2.661318 | -0.961116 | 0.568599  |
| 26 | 6 | 0 | -2.692460 | 1.379976  | -0.468251 |
| 27 | 6 | 0 | -1.914010 | 2.069688  | -1.602097 |
| 28 | 6 | 0 | -4.198142 | 1.704512  | -0.587965 |
| 29 | 6 | 0 | -2.968926 | -2.431354 | 0.434168  |
| 30 | 1 | 0 | -2.492862 | -0.578657 | -1.496566 |
| 31 | 1 | 0 | -2.755304 | -0.522609 | 1.560770  |
| 32 | 1 | 0 | -2.344194 | 1.756466  | 0.501480  |
| 33 | 1 | 0 | -2.283770 | 1.741559  | -2.581162 |
| 34 | 1 | 0 | -0.843068 | 1.838169  | -1.578643 |
| 35 | 1 | 0 | -2.027357 | 3.158406  | -1.543240 |
| 36 | 1 | 0 | -4.763317 | 1.274662  | 0.245628  |
| 37 | 1 | 0 | -4.614855 | 1.308464  | -1.522555 |
| 38 | 1 | 0 | -4.354456 | 2.790015  | -0.584099 |
| 39 | 1 | 0 | -2.601895 | -2.833633 | -0.514902 |
| 40 | 1 | 0 | -4.059671 | -2.568853 | 0.460473  |
| 41 | 1 | 0 | -2.553469 | -3.020967 | 1.256994  |

## TS (XI-XII)b

|                                              |              |
|----------------------------------------------|--------------|
| Zero-point correction=                       | 0.264062     |
| (Hartree/Particle)                           |              |
| Thermal correction to Energy=                | 0.282674     |
| Thermal correction to Enthalpy=              | 0.283618     |
| Thermal correction to Gibbs Free Energy=     | 0.216777     |
| Sum of electronic and zero-point Energies=   | -1477.323784 |
| Sum of electronic and thermal Energies=      | -1477.305173 |
| Sum of electronic and thermal Enthalpies=    | -1477.304229 |
| Sum of electronic and thermal Free Energies= | -1477.371069 |

| Center<br>Number | Atomic<br>Number | Atomic<br>Type | Coordinates (Angstroms) |           |           |
|------------------|------------------|----------------|-------------------------|-----------|-----------|
|                  |                  |                | X                       | Y         | Z         |
| 1                | 17               | 0              | -0.631529               | 2.075735  | 1.216743  |
| 2                | 44               | 0              | -0.644413               | 0.059851  | -0.188122 |
| 3                | 6                | 0              | -1.066594               | 1.040169  | -1.679643 |
| 4                | 17               | 0              | -0.591820               | -2.002101 | -1.530068 |
| 5                | 6                | 0              | 1.391132                | -0.056283 | 0.043198  |
| 6                | 6                | 0              | 3.425558                | -0.793490 | 0.921958  |
| 7                | 7                | 0              | 1.993699                | -1.052022 | 0.723893  |
| 8                | 7                | 0              | 2.331518                | 0.804314  | -0.380956 |
| 9                | 6                | 0              | 3.689485                | 0.308634  | -0.113102 |
| 10               | 6                | 0              | 2.119326                | 1.970420  | -1.217451 |
| 11               | 1                | 0              | -1.206771               | 2.125868  | -1.629947 |

|    |   |   |           |           |           |
|----|---|---|-----------|-----------|-----------|
| 12 | 1 | 0 | -1.199601 | 0.562323  | -2.656155 |
| 13 | 1 | 0 | 4.011287  | -1.700556 | 0.744662  |
| 14 | 1 | 0 | 3.613271  | -0.451863 | 1.950095  |
| 15 | 1 | 0 | 4.139738  | -0.087210 | -1.034407 |
| 16 | 1 | 0 | 4.326588  | 1.112390  | 0.267501  |
| 17 | 1 | 0 | 2.131514  | 1.713822  | -2.285674 |
| 18 | 1 | 0 | 1.168187  | 2.429960  | -0.950185 |
| 19 | 1 | 0 | 2.919448  | 2.690998  | -1.020999 |
| 20 | 6 | 0 | -3.025432 | 0.398630  | -0.492697 |
| 21 | 6 | 0 | -2.738635 | -0.626068 | 0.403920  |
| 22 | 6 | 0 | -2.853084 | -0.485202 | 1.904436  |
| 23 | 1 | 0 | -3.348235 | 0.149164  | -1.498980 |
| 24 | 1 | 0 | -3.230087 | 1.402087  | -0.131939 |
| 25 | 1 | 0 | -2.763732 | -1.640323 | 0.010936  |
| 26 | 1 | 0 | -2.768790 | 0.553983  | 2.227169  |
| 27 | 1 | 0 | -2.087516 | -1.072345 | 2.426251  |
| 28 | 1 | 0 | -3.826553 | -0.887121 | 2.221280  |
| 29 | 6 | 0 | 1.316414  | -2.083807 | 1.487419  |
| 30 | 1 | 0 | 0.373335  | -2.332048 | 0.995193  |
| 31 | 1 | 0 | 1.139043  | -1.770961 | 2.526176  |
| 32 | 1 | 0 | 1.934430  | -2.987468 | 1.494114  |

### TS (XI-XII) c

|                                              |              |
|----------------------------------------------|--------------|
| Zero-point correction=                       | 0.320939     |
| (Hartree/Particle)                           |              |
| Thermal correction to Energy=                | 0.342364     |
| Thermal correction to Enthalpy=              | 0.343308     |
| Thermal correction to Gibbs Free Energy=     | 0.269890     |
| Sum of electronic and zero-point Energies=   | -1555.890212 |
| Sum of electronic and thermal Energies=      | -1555.868787 |
| Sum of electronic and thermal Enthalpies=    | -1555.867843 |
| Sum of electronic and thermal Free Energies= | -1555.941261 |

| Center<br>Number | Atomic<br>Number | Atomic<br>Type | Coordinates (Angstroms) |           |           |
|------------------|------------------|----------------|-------------------------|-----------|-----------|
|                  |                  |                | X                       | Y         | Z         |
| 1                | 17               | 0              | -0.649437               | 0.993707  | 2.166728  |
| 2                | 44               | 0              | -0.198689               | -0.419005 | 0.208596  |
| 3                | 6                | 0              | -2.454552               | -0.565110 | -0.442632 |
| 4                | 17               | 0              | 0.256180                | -1.708447 | -1.834848 |
| 5                | 6                | 0              | -2.376287               | -1.495098 | 0.580796  |
| 6                | 6                | 0              | -0.110258               | -1.909968 | 1.266641  |
| 7                | 6                | 0              | 1.712529                | 0.318088  | 0.041618  |
| 8                | 6                | 0              | 3.432878                | 1.810430  | -0.504987 |
| 9                | 7                | 0              | 1.989400                | 1.564102  | -0.386557 |
| 10               | 7                | 0              | 2.871013                | -0.350212 | 0.204247  |
| 11               | 6                | 0              | 4.015078                | 0.400926  | -0.337065 |
| 12               | 6                | 0              | 1.063011                | 2.679037  | -0.474212 |
| 13               | 6                | 0              | 3.008224                | -1.781769 | 0.424419  |
| 14               | 6                | 0              | -3.158966               | 0.775822  | -0.312346 |
| 15               | 6                | 0              | -2.696301               | 1.761355  | -1.395845 |
| 16               | 6                | 0              | -4.683544               | 0.548088  | -0.417794 |
| 17               | 1                | 0              | -2.329217               | -0.942723 | -1.457259 |
| 18               | 1                | 0              | -2.293319               | -2.550680 | 0.341417  |
| 19               | 1                | 0              | -2.683873               | -1.231023 | 1.588750  |
| 20               | 1                | 0              | 0.060838                | -2.906841 | 0.844113  |
| 21               | 1                | 0              | -0.246648               | -1.846154 | 2.352506  |



|    |   |   |           |           |           |
|----|---|---|-----------|-----------|-----------|
| 22 | 1 | 0 | 3.755435  | 2.497255  | 0.290010  |
| 23 | 1 | 0 | 3.677589  | 2.262946  | -1.471253 |
| 24 | 1 | 0 | 4.866377  | 0.365874  | 0.349675  |
| 25 | 1 | 0 | 4.324872  | -0.033491 | -1.297461 |
| 26 | 1 | 0 | 0.851062  | 2.938055  | -1.518996 |
| 27 | 1 | 0 | 0.141583  | 2.432732  | 0.055546  |
| 28 | 1 | 0 | 1.502624  | 3.553506  | 0.020819  |
| 29 | 1 | 0 | 2.686688  | -2.351870 | -0.453652 |
| 30 | 1 | 0 | 4.058165  | -1.993411 | 0.645530  |
| 31 | 1 | 0 | 2.410615  | -2.084105 | 1.286799  |
| 32 | 1 | 0 | -2.905587 | 1.369737  | -2.399396 |
| 33 | 1 | 0 | -1.620682 | 1.956827  | -1.336791 |
| 34 | 1 | 0 | -3.215243 | 2.721011  | -1.292976 |
| 35 | 1 | 0 | -5.045175 | -0.104588 | 0.383939  |
| 36 | 1 | 0 | -4.951830 | 0.087552  | -1.377001 |
| 37 | 1 | 0 | -5.214382 | 1.504792  | -0.344856 |
| 38 | 1 | 0 | -2.935968 | 1.193381  | 0.674987  |

### TS (XI-XII) e

|                                              |              |
|----------------------------------------------|--------------|
| Zero-point correction=                       | 0.349334     |
| (Hartree/Particle)                           |              |
| Thermal correction to Energy=                | 0.372117     |
| Thermal correction to Enthalpy=              | 0.373061     |
| Thermal correction to Gibbs Free Energy=     | 0.296908     |
| Sum of electronic and zero-point Energies=   | -1595.175453 |
| Sum of electronic and thermal Energies=      | -1595.152670 |
| Sum of electronic and thermal Enthalpies=    | -1595.151726 |
| Sum of electronic and thermal Free Energies= | -1595.227879 |

| Center<br>Number | Atomic<br>Number | Atomic<br>Type | Coordinates (Angstroms) |           |           |
|------------------|------------------|----------------|-------------------------|-----------|-----------|
|                  |                  |                | X                       | Y         | Z         |
| 1                | 17               | 0              | -0.427121               | 1.212681  | 2.129149  |
| 2                | 44               | 0              | -0.130682               | -0.277859 | 0.194540  |
| 3                | 17               | 0              | 0.223792                | -1.653912 | -1.813774 |
| 4                | 6                | 0              | -0.343315               | -1.727496 | 1.298334  |
| 5                | 6                | 0              | 1.865364                | 0.232927  | 0.048138  |
| 6                | 6                | 0              | 3.763593                | 1.500218  | -0.480333 |
| 7                | 7                | 0              | 2.299151                | 1.431629  | -0.382326 |
| 8                | 7                | 0              | 2.931927                | -0.569926 | 0.234203  |
| 9                | 6                | 0              | 4.167404                | 0.032960  | -0.290490 |
| 10               | 6                | 0              | 1.518722                | 2.652181  | -0.485682 |
| 11               | 6                | 0              | 2.906295                | -2.006391 | 0.448263  |
| 12               | 1                | 0              | -0.279406               | -2.751259 | 0.915907  |
| 13               | 1                | 0              | -0.512386               | -1.605934 | 2.373922  |
| 14               | 1                | 0              | 4.154869                | 2.151182  | 0.313861  |
| 15               | 1                | 0              | 4.074814                | 1.910682  | -1.446234 |
| 16               | 1                | 0              | 4.995488                | -0.099642 | 0.412777  |
| 17               | 1                | 0              | 4.439006                | -0.447530 | -1.240629 |
| 18               | 1                | 0              | 1.348273                | 2.926481  | -1.534053 |
| 19               | 1                | 0              | 0.570945                | 2.524931  | 0.038974  |
| 20               | 1                | 0              | 2.060954                | 3.469132  | 0.005732  |
| 21               | 1                | 0              | 2.775959                | -2.547955 | -0.495668 |
| 22               | 1                | 0              | 3.847490                | -2.302585 | 0.922551  |
| 23               | 1                | 0              | 2.083839                | -2.261796 | 1.114837  |
| 24               | 6                | 0              | -2.304802               | -0.112551 | -0.471932 |
| 25               | 6                | 0              | -2.439158               | -1.119678 | 0.496452  |
| 26               | 6                | 0              | -2.887901               | 1.285631  | -0.304196 |

|    |   |   |           |           |           |
|----|---|---|-----------|-----------|-----------|
| 27 | 6 | 0 | -2.321971 | 2.260966  | -1.346124 |
| 28 | 6 | 0 | -4.424159 | 1.198255  | -0.446306 |
| 29 | 6 | 0 | -2.781003 | -2.541243 | 0.097307  |
| 30 | 1 | 0 | -2.247811 | -0.463375 | -1.504885 |
| 31 | 1 | 0 | -2.731012 | -0.797375 | 1.495463  |
| 32 | 1 | 0 | -2.651124 | 1.652532  | 0.698972  |
| 33 | 1 | 0 | -2.540032 | 1.917887  | -2.365772 |
| 34 | 1 | 0 | -1.236646 | 2.367052  | -1.257340 |
| 35 | 1 | 0 | -2.763828 | 3.256485  | -1.224716 |
| 36 | 1 | 0 | -4.862166 | 0.560344  | 0.329446  |
| 37 | 1 | 0 | -4.711260 | 0.789065  | -1.423484 |
| 38 | 1 | 0 | -4.871952 | 2.195373  | -0.356789 |
| 39 | 1 | 0 | -2.201704 | -2.848912 | -0.777860 |
| 40 | 1 | 0 | -3.846775 | -2.576144 | -0.167307 |
| 41 | 1 | 0 | -2.620874 | -3.258530 | 0.907422  |

## XIIb

|                                              |              |
|----------------------------------------------|--------------|
| Zero-point correction=                       | 0.266748     |
| (Hartree/Particle)                           |              |
| Thermal correction to Energy=                | 0.284504     |
| Thermal correction to Enthalpy=              | 0.285448     |
| Thermal correction to Gibbs Free Energy=     | 0.220831     |
| Sum of electronic and zero-point Energies=   | -1477.340255 |
| Sum of electronic and thermal Energies=      | -1477.322500 |
| Sum of electronic and thermal Enthalpies=    | -1477.321556 |
| Sum of electronic and thermal Free Energies= | -1477.386172 |

| Center<br>Number | Atomic<br>Number | Atomic<br>Type | Coordinates (Angstroms) |           |           |
|------------------|------------------|----------------|-------------------------|-----------|-----------|
|                  |                  |                | X                       | Y         | Z         |
| 1                | 17               | 0              | 0.704076                | 1.856032  | -1.512591 |
| 2                | 44               | 0              | 0.632257                | 0.094521  | 0.177182  |
| 3                | 6                | 0              | 1.860105                | 1.119426  | 1.345640  |
| 4                | 17               | 0              | 0.376014                | -1.583706 | 1.945416  |
| 5                | 6                | 0              | -1.373708               | -0.033931 | -0.078279 |
| 6                | 6                | 0              | -3.441769               | -0.731276 | -0.877411 |
| 7                | 7                | 0              | -2.007444               | -1.017923 | -0.732729 |
| 8                | 7                | 0              | -2.268798               | 0.854492  | 0.375386  |
| 9                | 6                | 0              | -3.645864               | 0.388318  | 0.157615  |
| 10               | 6                | 0              | -1.980002               | 1.963994  | 1.265695  |
| 11               | 1                | 0              | 1.930983                | 2.182307  | 1.115388  |
| 12               | 1                | 0              | 1.814438                | 0.870794  | 2.404944  |
| 13               | 1                | 0              | -4.037763               | -1.624405 | -0.667370 |
| 14               | 1                | 0              | -3.661205               | -0.395485 | -1.900485 |
| 15               | 1                | 0              | -4.070895               | 0.011199  | 1.098240  |
| 16               | 1                | 0              | -4.276800               | 1.203049  | -0.209771 |
| 17               | 1                | 0              | -2.148175               | 1.689174  | 2.315338  |
| 18               | 1                | 0              | -0.941844               | 2.270844  | 1.129350  |
| 19               | 1                | 0              | -2.624494               | 2.810642  | 1.007985  |
| 20               | 6                | 0              | 2.875213                | 0.241447  | 0.526727  |
| 21               | 6                | 0              | 2.255932                | -0.892311 | -0.417601 |
| 22               | 6                | 0              | 2.734323                | -0.902636 | -1.852387 |
| 23               | 1                | 0              | 3.465954                | -0.307083 | 1.263533  |
| 24               | 1                | 0              | 3.470105                | 0.900748  | -0.105942 |
| 25               | 1                | 0              | 2.319855                | -1.867079 | 0.070662  |
| 26               | 1                | 0              | 2.667911                | 0.082180  | -2.317507 |
| 27               | 1                | 0              | 2.138663                | -1.606923 | -2.444964 |

|    |   |   |           |           |           |
|----|---|---|-----------|-----------|-----------|
| 28 | 1 | 0 | 3.776902  | -1.254593 | -1.892138 |
| 29 | 6 | 0 | -1.363141 | -2.076005 | -1.488011 |
| 30 | 1 | 0 | -0.390882 | -2.290767 | -1.040218 |
| 31 | 1 | 0 | -1.233016 | -1.798299 | -2.542368 |
| 32 | 1 | 0 | -1.973432 | -2.982890 | -1.429242 |

---

## XIIC

|                                              |              |
|----------------------------------------------|--------------|
| Zero-point correction=                       | 0.324015     |
| (Hartree/Particle)                           |              |
| Thermal correction to Energy=                | 0.345262     |
| Thermal correction to Enthalpy=              | 0.346206     |
| Thermal correction to Gibbs Free Energy=     | 0.273488     |
| Sum of electronic and zero-point Energies=   | -1555.909042 |
| Sum of electronic and thermal Energies=      | -1555.887795 |
| Sum of electronic and thermal Enthalpies=    | -1555.886851 |
| Sum of electronic and thermal Free Energies= | -1555.959570 |

---

| Center<br>Number | Atomic<br>Number | Atomic<br>Type | Coordinates (Angstroms) |           |           |
|------------------|------------------|----------------|-------------------------|-----------|-----------|
|                  |                  |                | X                       | Y         | Z         |
| 1                | 17               | 0              | 0.415284                | -0.827182 | -2.241345 |
| 2                | 44               | 0              | 0.228530                | -0.488338 | 0.174161  |
| 3                | 6                | 0              | 2.085348                | 0.196065  | 0.418683  |
| 4                | 17               | 0              | -0.123255               | -0.216348 | 2.584531  |
| 5                | 6                | 0              | 2.284043                | -1.386204 | 0.547397  |
| 6                | 6                | 0              | 0.992107                | -2.282977 | 0.501881  |
| 7                | 6                | 0              | -1.646192               | 0.256283  | -0.091398 |
| 8                | 6                | 0              | -3.432354               | 1.738206  | -0.263265 |
| 9                | 7                | 0              | -2.030978               | 1.522631  | 0.123530  |
| 10               | 7                | 0              | -2.702601               | -0.470761 | -0.487260 |
| 11               | 6                | 0              | -3.952595               | 0.296740  | -0.390533 |
| 12               | 6                | 0              | -1.175089               | 2.630621  | 0.502434  |
| 13               | 6                | 0              | -2.720155               | -1.909012 | -0.688546 |
| 14               | 6                | 0              | 2.903240                | 0.891589  | -0.662013 |
| 15               | 6                | 0              | 2.349924                | 2.295154  | -0.953609 |
| 16               | 6                | 0              | 4.379069                | 0.974138  | -0.218118 |
| 17               | 1                | 0              | 2.189370                | 0.671657  | 1.398555  |
| 18               | 1                | 0              | 2.730312                | -1.539369 | 1.531583  |
| 19               | 1                | 0              | 2.929254                | -1.688926 | -0.278109 |
| 20               | 1                | 0              | 0.735732                | -2.731287 | 1.460889  |
| 21               | 1                | 0              | 0.967039                | -2.957395 | -0.353702 |
| 22               | 1                | 0              | -3.485300               | 2.286318  | -1.214052 |
| 23               | 1                | 0              | -3.956656               | 2.318163  | 0.502302  |
| 24               | 1                | 0              | -4.570123               | 0.139576  | -1.279848 |
| 25               | 1                | 0              | -4.524734               | -0.018419 | 0.493228  |
| 26               | 1                | 0              | -1.703449               | 3.262233  | 1.224427  |
| 27               | 1                | 0              | -0.279252               | 2.239053  | 0.985329  |
| 28               | 1                | 0              | -0.896232               | 3.239998  | -0.367154 |
| 29               | 1                | 0              | -3.019598               | -2.438837 | 0.225684  |
| 30               | 1                | 0              | -3.429512               | -2.148051 | -1.487330 |
| 31               | 1                | 0              | -1.728543               | -2.236151 | -1.004540 |
| 32               | 1                | 0              | 2.309520                | 2.907154  | -0.042381 |
| 33               | 1                | 0              | 1.343349                | 2.231805  | -1.378788 |
| 34               | 1                | 0              | 2.989279                | 2.816531  | -1.675571 |
| 35               | 1                | 0              | 4.805909                | -0.018369 | -0.032689 |
| 36               | 1                | 0              | 4.483433                | 1.562791  | 0.702316  |
| 37               | 1                | 0              | 4.982779                | 1.456991  | -0.995607 |
| 38               | 1                | 0              | 2.838602                | 0.304728  | -1.583177 |

-----

## XIIe

Zero-point correction= 0.352382  
 (Hartree/Particle)  
 Thermal correction to Energy= 0.375034  
 Thermal correction to Enthalpy= 0.375978  
 Thermal correction to Gibbs Free Energy= 0.300395  
 Sum of electronic and zero-point Energies= -1595.189400  
 Sum of electronic and thermal Energies= -1595.166747  
 Sum of electronic and thermal Enthalpies= -1595.165803  
 Sum of electronic and thermal Free Energies= -1595.241387

-----

| Center<br>Number | Atomic<br>Number | Atomic<br>Type | Coordinates (Angstroms) |           |           |
|------------------|------------------|----------------|-------------------------|-----------|-----------|
|                  |                  |                | X                       | Y         | Z         |
| 1                | 17               | 0              | -0.269910               | 1.044845  | 2.228300  |
| 2                | 44               | 0              | -0.115028               | -0.319005 | 0.206225  |
| 3                | 17               | 0              | 0.238146                | -1.682503 | -1.808354 |
| 4                | 6                | 0              | -0.987907               | -1.819583 | 1.137115  |
| 5                | 6                | 0              | 1.837374                | 0.230422  | -0.005126 |
| 6                | 6                | 0              | 3.770759                | 1.430000  | -0.510669 |
| 7                | 7                | 0              | 2.300550                | 1.396402  | -0.475467 |
| 8                | 7                | 0              | 2.867538                | -0.586462 | 0.268933  |
| 9                | 6                | 0              | 4.137677                | -0.035550 | -0.226782 |
| 10               | 6                | 0              | 1.534838                | 2.622212  | -0.618847 |
| 11               | 6                | 0              | 2.771484                | -2.003360 | 0.583088  |
| 12               | 6                | 0              | -1.959708               | 0.107579  | -0.475944 |
| 13               | 6                | 0              | -2.257000               | -1.119787 | 0.505521  |
| 14               | 6                | 0              | -2.720868               | 1.403464  | -0.213548 |
| 15               | 6                | 0              | -2.317634               | 2.479967  | -1.234481 |
| 16               | 6                | 0              | -4.245913               | 1.168596  | -0.304165 |
| 17               | 6                | 0              | -3.067841               | -2.180049 | -0.264367 |
| 18               | 1                | 0              | -0.797518               | -2.810110 | 0.721470  |
| 19               | 1                | 0              | -0.964434               | -1.761082 | 2.225675  |
| 20               | 1                | 0              | 4.140088                | 2.113147  | 0.266288  |
| 21               | 1                | 0              | 4.133233                | 1.781523  | -1.481589 |
| 22               | 1                | 0              | 4.928882                | -0.144733 | 0.521352  |
| 23               | 1                | 0              | 4.441961                | -0.569606 | -1.137230 |
| 24               | 1                | 0              | 1.372340                | 2.869880  | -1.674378 |
| 25               | 1                | 0              | 0.580471                | 2.510552  | -0.103689 |
| 26               | 1                | 0              | 2.079954                | 3.445502  | -0.142099 |
| 27               | 1                | 0              | 2.774602                | -2.612484 | -0.327903 |
| 28               | 1                | 0              | 3.617074                | -2.278887 | 1.221870  |
| 29               | 1                | 0              | 1.846650                | -2.195098 | 1.127414  |
| 30               | 1                | 0              | -2.046001               | -0.218150 | -1.517230 |
| 31               | 1                | 0              | -2.800721               | -0.685587 | 1.347798  |
| 32               | 1                | 0              | -2.482029               | 1.757669  | 0.794017  |
| 33               | 1                | 0              | -2.533619               | 2.150659  | -2.259162 |
| 34               | 1                | 0              | -1.251922               | 2.716337  | -1.179574 |
| 35               | 1                | 0              | -2.876339               | 3.405948  | -1.055803 |
| 36               | 1                | 0              | -4.600414               | 0.457440  | 0.449284  |
| 37               | 1                | 0              | -4.532535               | 0.788912  | -1.293268 |
| 38               | 1                | 0              | -4.777734               | 2.113788  | -0.143561 |
| 39               | 1                | 0              | -2.469651               | -2.582894 | -1.086745 |
| 40               | 1                | 0              | -3.984636               | -1.747891 | -0.676602 |
| 41               | 1                | 0              | -3.344656               | -3.001461 | 0.405656  |

-----
